# Supplementary material for: Determination of Trunk Neural Crest Cell Fate and Susceptibility to Splicing Perturbation by the DLC1-SF3B1-PHF5A Splicing Complex
Source: Research Square preprint supplement (doi:10.21203/rs.3.rs-2603667/v1), 2024-05-09
Supplement: Supplementary file 1 [file 34bb66373e84a15c981a6ba8.xlsx]

## Sheet: Hub_1
Hub_1	ID	Majority protein IDs	Protein names	GeneNames	iBAQ_IgG	iBAQ_DLC1	GO term_Molecular function	Mutual GO
RNA binding	RBM17	Q96I25	Splicing factor 45	RBM17	NaN	18.5053	RNA binding	RNA binding
RNA binding	CWC22	Q96I26	Pre-mRNA-splicing factor CWC22 homolog	CWC22	NaN	18.9436	RNA binding	RNA binding
RNA binding	PRPF38A	Q96I28	Pre-mRNA-splicing factor 38A	PRPF38A	NaN	19.5214	RNA binding	RNA binding
RNA binding	U2AF1	Q96I29	Splicing factor U2AF 26 kDa subunit;Splicing factor U2AF 35 kDa subunit	U2AF1	NaN	19.6405	Metal ion binding;pre-mRNA 3'-splice site binding;RNA binding;RS domain binding	RNA binding
RNA binding	SRSF5	Q96I30	Serine/arginine-rich splicing factor 5	SRSF5	NaN	20.61	RNA binding	RNA binding
RNA binding	SF3B1	Q96I31	Splicing factor 3B subunit 1	SF3B1	NaN	20.8261	mRNA binding;RNA binding;splicing factor binding	RNA binding
RNA binding	PHF5A	Q96I32	PHD finger-like domain-containing protein 5A	PHF5A	NaN	20.838	DNA binding;RNA binding;Zinc ion binding	RNA binding
RNA binding	ISY1	Q96I33	Pre-mRNA-splicing factor ISY1 homolog	ISY1	NaN	21.5172	RNA binding	RNA binding
RNA binding	DHX15	Q96I36	Pre-mRNA-splicing factor ATP-dependent RNA helicase DHX15	DHX15	NaN	22.3803	ATP binding;ATP hydrolysis activity;ATP-dependent activity, acting on RNA;double-stranded RNA binding;helicase activity;RNA binding;RNA helicase activity	RNA binding
RNA binding	SF3B6	Q96I37	Splicing factor 3B subunit 6	SF3B6	NaN	22.4415	mRNA binding; RNA binding	RNA binding
RNA binding	SF3B2	Q96I38	Splicing factor 3B subunit 2	SF3B2	NaN	22.5236	RNA binding	RNA binding
RNA binding	RTCB	Q96I39	tRNA-splicing ligase RtcB homolog	RTCB	NaN	23.1056	GTP binding;metal ion binding;RNA binding;RNA ligase (ATP) activity;vinculin binding	RNA binding
RNA binding	SF3B3	Q96I40	Splicing factor 3B subunit 3	SF3B3	NaN	23.1497	protein-containing complex binding;U2 snRNA binding	RNA binding
RNA binding	SRSF10	Q96I41	Serine/arginine-rich splicing factor 10	SRSF10	NaN	23.2758	RNA binding;RS domain binding;unfolded protein binding	RNA binding
RNA binding	SF3A1	Q96I42	Splicing factor 3A subunit 1	SF3A1	NaN	23.368	RNA binding	RNA binding
RNA binding	SF1	Q96I43	Splicing factor 1	SF1	NaN	23.7819	identical protein binding;mRNA binding;RNA binding;transcription corepressor activity;zinc ion binding	RNA binding
RNA binding	SFPQ	Q96I44	Splicing factor, proline- and glutamine-rich	SFPQ	NaN	23.8104	chromatin binding;DNA binding;histone deacetylase binding;protein homodimerization activity;RNA binding;transcription cis-regulatory region binding	RNA binding
RNA binding	U2AF2	Q96I45	Splicing factor U2AF 65 kDa subunit	U2AF2	NaN	24.5753	C2H2 zinc finger domain binding;enzyme binding;molecular function inhibitor activity;poly-pyrimidine tract binding;pre-mRNA 3'-splice site binding;RNA binding	RNA binding
RNA binding	SRSF2	Q96I46	Serine/arginine-rich splicing factor 2	SRSF2	NaN	25.6558	RNA binding;transcription corepressor activity	RNA binding
RNA binding	SRSF1	Q96I47	Serine/arginine-rich splicing factor 1	SRSF1	NaN	25.8433	DNA topoisomerase binding;mRNA binding;protein kinase B binding;RNA binding	RNA binding
RNA binding	SRSF6	Q96I48	Serine/arginine-rich splicing factor 6	SRSF6	NaN	26.6165	pre-mRNA binding;RNA binding	RNA binding
RNA binding	SRSF3	Q96I49	Serine/arginine-rich splicing factor 3	SRSF3	NaN	27.1504	phospholipase binding;primary miRNA binding; RNA binding	RNA binding
Notes:
Protein in yellow: protein of interest in the splicing complex.

## Sheet: Hub_2
Hub_2	ID	Protein Name	Mutual GO
GTP binding	ARL15	ADP ribosylation factor like GTPase 15(ARL15)	GTP_binding
GTP binding	ARL2	ADP ribosylation factor like GTPase 2(ARL2)	GTP_binding
GTP binding	ARL3	ADP ribosylation factor like GTPase 3(ARL3)	GTP_binding
GTP binding	ARL8A	ADP ribosylation factor like GTPase 8A(ARL8A)	GTP_binding
GTP binding	ARL8B	ADP ribosylation factor like GTPase 8B(ARL8B)	GTP_binding
GTP binding	EHD3	EH domain containing 3(EHD3)	GTP_binding
GTP binding	FKBP4	FKBP prolyl isomerase 4(FKBP4)	GTP_binding
GTP binding	GFM1	G elongation factor mitochondrial 1(GFM1)	GTP_binding
GTP binding	GNAI1	G protein subunit alpha i1(GNAI1)	GTP_binding
GTP binding	GNAI2	G protein subunit alpha i2(GNAI2)	GTP_binding
GTP binding	GNAO1	G protein subunit alpha o1(GNAO1)	GTP_binding
GTP binding	GTPBP1	GTP binding protein 1(GTPBP1)	GTP_binding
GTP binding	HRAS	HRas proto-oncogene, GTPase(HRAS)	GTP_binding
GTP binding	OLA1	Obg like ATPase 1(OLA1)	GTP_binding
GTP binding	RAB14	RAB14, member RAS oncogene family(RAB14)	GTP_binding
GTP binding	RAB18	RAB18, member RAS oncogene family(RAB18)	GTP_binding
GTP binding	RAB1A	RAB1A, member RAS oncogene family(RAB1A)	GTP_binding
GTP binding	RAB1B	RAB1B, member RAS oncogene family(RAB1B)	GTP_binding
GTP binding	RAB21	RAB21, member RAS oncogene family(RAB21)	GTP_binding
GTP binding	RAB27A	RAB27A, member RAS oncogene family(RAB27A)	GTP_binding
GTP binding	RAB35	RAB35, member RAS oncogene family(RAB35)	GTP_binding
GTP binding	RAB5A	RAB5A, member RAS oncogene family(RAB5A)	GTP_binding
GTP binding	RAB5B	RAB5B, member RAS oncogene family(RAB5B)	GTP_binding
GTP binding	RAB5C	RAB5C, member RAS oncogene family(RAB5C)	GTP_binding
GTP binding	RAB6C	RAB6C, member RAS oncogene family(RAB6C)	GTP_binding
GTP binding	RAB7A	RAB7A, member RAS oncogene family(RAB7A)	GTP_binding
GTP binding	RAN	RAN, member RAS oncogene family(RAN)	GTP_binding
GTP binding	RALA	RAS like proto-oncogene A(RALA)	GTP_binding
GTP binding	RALB	RAS like proto-oncogene B(RALB)	GTP_binding
GTP binding	RTCB	RNA 2',3'-cyclic phosphate and 5'-OH ligase(RTCB)	GTP_binding
GTP binding	TUFM	Tu translation elongation factor, mitochondrial(TUFM)	GTP_binding
GTP binding	ANXA6	annexin A6(ANXA6)	GTP_binding
GTP binding	CDC42	cell division cycle 42(CDC42)	GTP_binding
GTP binding	DRG1	developmentally regulated GTP binding protein 1(DRG1)	GTP_binding
GTP binding	DRG2	developmentally regulated GTP binding protein 2(DRG2)	GTP_binding
GTP binding	DNM1L	dynamin 1 like(DNM1L)	GTP_binding
GTP binding	DNM2	dynamin 2(DNM2)	GTP_binding
GTP binding	EFTUD2	elongation factor Tu GTP binding domain containing 2(EFTUD2)	GTP_binding
GTP binding	EEF2	eukaryotic translation elongation factor 2(EEF2)	GTP_binding
GTP binding	EIF2B2	eukaryotic translation initiation factor 2B subunit beta(EIF2B2)	GTP_binding
GTP binding	EIF5	eukaryotic translation initiation factor 5(EIF5)	GTP_binding
GTP binding	HSP90AA1	heat shock protein 90 alpha family class A member 1(HSP90AA1)	GTP_binding
GTP binding	HSP90AB1	heat shock protein 90 alpha family class B member 1(HSP90AB1)	GTP_binding
GTP binding	NPR1	natriuretic peptide receptor 1(NPR1)	GTP_binding
GTP binding	RHOA	ras homolog family member A(RHOA)	GTP_binding
GTP binding	RHOT1	ras homolog family member T1(RHOT1)	GTP_binding
GTP binding	SEPHS1	selenophosphate synthetase 1(SEPHS1)	GTP_binding
GTP binding	SRP54	signal recognition particle 54(SRP54)	GTP_binding
GTP binding	SUCLG2	succinate-CoA ligase GDP-forming subunit beta(SUCLG2)	GTP_binding
GTP binding	TUBA4A	tubulin alpha 4a(TUBA4A)	GTP_binding
GTP binding	TUBB2A	tubulin beta 2A class IIa(TUBB2A)	GTP_binding
GTP binding	TUBB2B	tubulin beta 2B class IIb(TUBB2B)	GTP_binding
GTP binding	TUBB3	tubulin beta 3 class III(TUBB3)	GTP_binding
GTP binding	TUBB6	tubulin beta 6 class V(TUBB6)	GTP_binding
GTP binding	UPRT	uracil phosphoribosyltransferase homolog(UPRT)	GTP_binding

## Sheet: Hub_3
Hub_3	ID	Protein Name	Mutual GO
GDP binding	ARL2	ADP ribosylation factor like GTPase 2(ARL2)	GDP_binding
GDP binding	ARL3	ADP ribosylation factor like GTPase 3(ARL3)	GDP_binding
GDP binding	ARL8B	ADP ribosylation factor like GTPase 8B(ARL8B)	GDP_binding
GDP binding	GNAI1	G protein subunit alpha i1(GNAI1)	GDP_binding
GDP binding	HRAS	HRas proto-oncogene, GTPase(HRAS)	GDP_binding
GDP binding	RAB14	RAB14, member RAS oncogene family(RAB14)	GDP_binding
GDP binding	RAB18	RAB18, member RAS oncogene family(RAB18)	GDP_binding
GDP binding	RAB21	RAB21, member RAS oncogene family(RAB21)	GDP_binding
GDP binding	RAB27A	RAB27A, member RAS oncogene family(RAB27A)	GDP_binding
GDP binding	RAB35	RAB35, member RAS oncogene family(RAB35)	GDP_binding
GDP binding	RAB5A	RAB5A, member RAS oncogene family(RAB5A)	GDP_binding
GDP binding	RAB5B	RAB5B, member RAS oncogene family(RAB5B)	GDP_binding
GDP binding	RAB5C	RAB5C, member RAS oncogene family(RAB5C)	GDP_binding
GDP binding	RAB7A	RAB7A, member RAS oncogene family(RAB7A)	GDP_binding
GDP binding	RAN	RAN, member RAS oncogene family(RAN)	GDP_binding
GDP binding	RALA	RAS like proto-oncogene A(RALA)	GDP_binding
GDP binding	RALB	RAS like proto-oncogene B(RALB)	GDP_binding
GDP binding	DYNC1LI1	dynein cytoplasmic 1 light intermediate chain 1(DYNC1LI1)	GDP_binding
GDP binding	RHOA	ras homolog family member A(RHOA)	GDP_binding
GDP binding	SRP54	signal recognition particle 54(SRP54)	GDP_binding
GDP binding	SUCLG2	succinate-CoA ligase GDP-forming subunit beta(SUCLG2)	GDP_binding

## Sheet: Hub_4
Hub_4	ID	Protein Name	Mutual GO
GTPase activity	ARL15	ADP ribosylation factor like GTPase 15(ARL15)	GTPase_activity
GTPase activity	ARL2	ADP ribosylation factor like GTPase 2(ARL2)	GTPase_activity
GTPase activity	ARL3	ADP ribosylation factor like GTPase 3(ARL3)	GTPase_activity
GTPase activity	ARL8A	ADP ribosylation factor like GTPase 8A(ARL8A)	GTPase_activity
GTPase activity	ARL8B	ADP ribosylation factor like GTPase 8B(ARL8B)	GTPase_activity
GTPase activity	ABCE1	ATP binding cassette subfamily E member 1(ABCE1)	GTPase_activity
GTPase activity	GFM1	G elongation factor mitochondrial 1(GFM1)	GTPase_activity
GTPase activity	GNAI1	G protein subunit alpha i1(GNAI1)	GTPase_activity
GTPase activity	GNAI2	G protein subunit alpha i2(GNAI2)	GTPase_activity
GTPase activity	GNAO1	G protein subunit alpha o1(GNAO1)	GTPase_activity
GTPase activity	GNB1	G protein subunit beta 1(GNB1)	GTPase_activity
GTPase activity	GTPBP1	GTP binding protein 1(GTPBP1)	GTPase_activity
GTPase activity	HRAS	HRas proto-oncogene, GTPase(HRAS)	GTPase_activity
GTPase activity	RAB14	RAB14, member RAS oncogene family(RAB14)	GTPase_activity
GTPase activity	RAB18	RAB18, member RAS oncogene family(RAB18)	GTPase_activity
GTPase activity	RAB1A	RAB1A, member RAS oncogene family(RAB1A)	GTPase_activity
GTPase activity	RAB1B	RAB1B, member RAS oncogene family(RAB1B)	GTPase_activity
GTPase activity	RAB21	RAB21, member RAS oncogene family(RAB21)	GTPase_activity
GTPase activity	RAB27A	RAB27A, member RAS oncogene family(RAB27A)	GTPase_activity
GTPase activity	RAB35	RAB35, member RAS oncogene family(RAB35)	GTPase_activity
GTPase activity	RAB5A	RAB5A, member RAS oncogene family(RAB5A)	GTPase_activity
GTPase activity	RAB5B	RAB5B, member RAS oncogene family(RAB5B)	GTPase_activity
GTPase activity	RAB5C	RAB5C, member RAS oncogene family(RAB5C)	GTPase_activity
GTPase activity	RAB6C	RAB6C, member RAS oncogene family(RAB6C)	GTPase_activity
GTPase activity	RAB7A	RAB7A, member RAS oncogene family(RAB7A)	GTPase_activity
GTPase activity	RAN	RAN, member RAS oncogene family(RAN)	GTPase_activity
GTPase activity	RALA	RAS like proto-oncogene A(RALA)	GTPase_activity
GTPase activity	RALB	RAS like proto-oncogene B(RALB)	GTPase_activity
GTPase activity	TUFM	Tu translation elongation factor, mitochondrial(TUFM)	GTPase_activity
GTPase activity	CDC42	cell division cycle 42(CDC42)	GTPase_activity
GTPase activity	DRG1	developmentally regulated GTP binding protein 1(DRG1)	GTPase_activity
GTPase activity	DRG2	developmentally regulated GTP binding protein 2(DRG2)	GTPase_activity
GTPase activity	DNM1L	dynamin 1 like(DNM1L)	GTPase_activity
GTPase activity	DNM2	dynamin 2(DNM2)	GTPase_activity
GTPase activity	EFTUD2	elongation factor Tu GTP binding domain containing 2(EFTUD2)	GTPase_activity
GTPase activity	EEF2	eukaryotic translation elongation factor 2(EEF2)	GTPase_activity
GTPase activity	RHOA	ras homolog family member A(RHOA)	GTPase_activity
GTPase activity	RHOT1	ras homolog family member T1(RHOT1)	GTPase_activity
GTPase activity	SRP54	signal recognition particle 54(SRP54)	GTPase_activity
GTPase activity	TUBA4A	tubulin alpha 4a(TUBA4A)	GTPase_activity
GTPase activity	TUBB2A	tubulin beta 2A class IIa(TUBB2A)	GTPase_activity
GTPase activity	TUBB2B	tubulin beta 2B class IIb(TUBB2B)	GTPase_activity
GTPase activity	TUBB3	tubulin beta 3 class III(TUBB3)	GTPase_activity
GTPase activity	TUBB6	tubulin beta 6 class V(TUBB6)	GTPase_activity

## Sheet: Hub_5
Hub_5	ID	Protein Name	Mutual GO
Protein serine threonine kinase activity	AAK1	AP2 associated kinase 1(AAK1)	protein_serinethreonine_kinase_activity
Protein serine threonine kinase activity	TOP1	DNA topoisomerase I(TOP1)	protein_serinethreonine_kinase_activity
Protein serine threonine kinase activity	RIOK2	RIO kinase 2(RIOK2)	protein_serinethreonine_kinase_activity
Protein serine threonine kinase activity	RAF1	Raf-1 proto-oncogene, serine/threonine kinase(RAF1)	protein_serinethreonine_kinase_activity
Protein serine threonine kinase activity	SRPK1	SRSF protein kinase 1(SRPK1)	protein_serinethreonine_kinase_activity
Protein serine threonine kinase activity	SRPK2	SRSF protein kinase 2(SRPK2)	protein_serinethreonine_kinase_activity
Protein serine threonine kinase activity	TAOK1	TAO kinase 1(TAOK1)	protein_serinethreonine_kinase_activity
Protein serine threonine kinase activity	CASK	calcium/calmodulin dependent serine protein kinase(CASK)	protein_serinethreonine_kinase_activity
Protein serine threonine kinase activity	CSNK1A1	casein kinase 1 alpha 1(CSNK1A1)	protein_serinethreonine_kinase_activity
Protein serine threonine kinase activity	CSNK1E	casein kinase 1 epsilon(CSNK1E)	protein_serinethreonine_kinase_activity
Protein serine threonine kinase activity	CSNK2B	casein kinase 2 beta(CSNK2B)	protein_serinethreonine_kinase_activity
Protein serine threonine kinase activity	CPNE3	copine 3(CPNE3)	protein_serinethreonine_kinase_activity
Protein serine threonine kinase activity	CDK2	cyclin dependent kinase 2(CDK2)	protein_serinethreonine_kinase_activity
Protein serine threonine kinase activity	CDK5	cyclin dependent kinase 5(CDK5)	protein_serinethreonine_kinase_activity
Protein serine threonine kinase activity	CLASP1	cytoplasmic linker associated protein 1(CLASP1)	protein_serinethreonine_kinase_activity
Protein serine threonine kinase activity	GSK3B	glycogen synthase kinase 3 beta(GSK3B)	protein_serinethreonine_kinase_activity
Protein serine threonine kinase activity	ILK	integrin linked kinase(ILK)	protein_serinethreonine_kinase_activity
Protein serine threonine kinase activity	PRKCI	protein kinase C iota(PRKCI)	protein_serinethreonine_kinase_activity
Protein serine threonine kinase activity	PDK3	pyruvate dehydrogenase kinase 3(PDK3)	protein_serinethreonine_kinase_activity
Protein serine threonine kinase activity	RPS6KA3	ribosomal protein S6 kinase A3(RPS6KA3)	protein_serinethreonine_kinase_activity
Protein serine threonine kinase activity	RPS6KB1	ribosomal protein S6 kinase B1(RPS6KB1)	protein_serinethreonine_kinase_activity

## Sheet: Hub_6
Hub_6	ID	Protein Name	Mutual GO
Protein kinase activity	AAK1	AP2 associated kinase 1(AAK1)	protein_kinase_activity
Protein kinase activity	RIOK2	RIO kinase 2(RIOK2)	protein_kinase_activity
Protein kinase activity	RAF1	Raf-1 proto-oncogene, serine/threonine kinase(RAF1)	protein_kinase_activity
Protein kinase activity	SRPK1	SRSF protein kinase 1(SRPK1)	protein_kinase_activity
Protein kinase activity	SRPK2	SRSF protein kinase 2(SRPK2)	protein_kinase_activity
Protein kinase activity	TAOK1	TAO kinase 1(TAOK1)	protein_kinase_activity
Protein kinase activity	CASK	calcium/calmodulin dependent serine protein kinase(CASK)	protein_kinase_activity
Protein kinase activity	CSNK1A1	casein kinase 1 alpha 1(CSNK1A1)	protein_kinase_activity
Protein kinase activity	CSNK1E	casein kinase 1 epsilon(CSNK1E)	protein_kinase_activity
Protein kinase activity	CDK2	cyclin dependent kinase 2(CDK2)	protein_kinase_activity
Protein kinase activity	CDK5	cyclin dependent kinase 5(CDK5)	protein_kinase_activity
Protein kinase activity	GSK3B	glycogen synthase kinase 3 beta(GSK3B)	protein_kinase_activity
Protein kinase activity	ILK	integrin linked kinase(ILK)	protein_kinase_activity
Protein kinase activity	MYLK	myosin light chain kinase(MYLK)	protein_kinase_activity
Protein kinase activity	NPR1	natriuretic peptide receptor 1(NPR1)	protein_kinase_activity
Protein kinase activity	PRKCI	protein kinase C iota(PRKCI)	protein_kinase_activity
Protein kinase activity	PDK1	pyruvate dehydrogenase kinase 1(PDK1)	protein_kinase_activity
Protein kinase activity	PDK3	pyruvate dehydrogenase kinase 3(PDK3)	protein_kinase_activity
Protein kinase activity	RPS6KA3	ribosomal protein S6 kinase A3(RPS6KA3)	protein_kinase_activity
Protein kinase activity	RPS6KB1	ribosomal protein S6 kinase B1(RPS6KB1)	protein_kinase_activity

## Sheet: Hub_7
Hub_7	ID	Protein Name	Mutual GO
Protein serine threonine tyrosine kinase activity	AAK1	AP2 associated kinase 1(AAK1)	protein_serinethreoninetyrosine_kinase_activity
Protein serine threonine tyrosine kinase activity	CSK	C-terminal Src kinase(CSK)	protein_serinethreoninetyrosine_kinase_activity
Protein serine threonine tyrosine kinase activity	RIOK2	RIO kinase 2(RIOK2)	protein_serinethreoninetyrosine_kinase_activity
Protein serine threonine tyrosine kinase activity	RAF1	Raf-1 proto-oncogene, serine/threonine kinase(RAF1)	protein_serinethreoninetyrosine_kinase_activity
Protein serine threonine tyrosine kinase activity	SRPK1	SRSF protein kinase 1(SRPK1)	protein_serinethreoninetyrosine_kinase_activity
Protein serine threonine tyrosine kinase activity	SRPK2	SRSF protein kinase 2(SRPK2)	protein_serinethreoninetyrosine_kinase_activity
Protein serine threonine tyrosine kinase activity	TAOK1	TAO kinase 1(TAOK1)	protein_serinethreoninetyrosine_kinase_activity
Protein serine threonine tyrosine kinase activity	CASK	calcium/calmodulin dependent serine protein kinase(CASK)	protein_serinethreoninetyrosine_kinase_activity
Protein serine threonine tyrosine kinase activity	CSNK1A1	casein kinase 1 alpha 1(CSNK1A1)	protein_serinethreoninetyrosine_kinase_activity
Protein serine threonine tyrosine kinase activity	CSNK1E	casein kinase 1 epsilon(CSNK1E)	protein_serinethreoninetyrosine_kinase_activity
Protein serine threonine tyrosine kinase activity	CDK2	cyclin dependent kinase 2(CDK2)	protein_serinethreoninetyrosine_kinase_activity
Protein serine threonine tyrosine kinase activity	CDK5	cyclin dependent kinase 5(CDK5)	protein_serinethreoninetyrosine_kinase_activity
Protein serine threonine tyrosine kinase activity	CLASP1	cytoplasmic linker associated protein 1(CLASP1)	protein_serinethreoninetyrosine_kinase_activity
Protein serine threonine tyrosine kinase activity	GSK3B	glycogen synthase kinase 3 beta(GSK3B)	protein_serinethreoninetyrosine_kinase_activity
Protein serine threonine tyrosine kinase activity	ILK	integrin linked kinase(ILK)	protein_serinethreoninetyrosine_kinase_activity
Protein serine threonine tyrosine kinase activity	PRKCI	protein kinase C iota(PRKCI)	protein_serinethreoninetyrosine_kinase_activity
Protein serine threonine tyrosine kinase activity	RPS6KA3	ribosomal protein S6 kinase A3(RPS6KA3)	protein_serinethreoninetyrosine_kinase_activity
Protein serine threonine tyrosine kinase activity	RPS6KB1	ribosomal protein S6 kinase B1(RPS6KB1)	protein_serinethreoninetyrosine_kinase_activity

## Sheet: Hub_8
Hub_8	ID	Protein Name	Mutual GO
DNA binding	DNMT3A	DNA methyltransferase 3 alpha(DNMT3A)	RNA_polymerase_II_core_promoter_proximal_region_sequence-specific_DNA_binding
DNA binding	TOP1	DNA topoisomerase I(TOP1)	RNA_polymerase_II_core_promoter_proximal_region_sequence-specific_DNA_binding
DNA binding	GABPA	GA binding protein transcription factor subunit alpha(GABPA)	RNA_polymerase_II_core_promoter_proximal_region_sequence-specific_DNA_binding
DNA binding	PBX1	PBX homeobox 1(PBX1)	RNA_polymerase_II_core_promoter_proximal_region_sequence-specific_DNA_binding
DNA binding	RAD23B	RAD23 homolog B, nucleotide excision repair protein(RAD23B)	RNA_polymerase_II_core_promoter_proximal_region_sequence-specific_DNA_binding
DNA binding	RUVBL2	RuvB like AAA ATPase 2(RUVBL2)	RNA_polymerase_II_core_promoter_proximal_region_sequence-specific_DNA_binding
DNA binding	SMAD1	SMAD family member 1(SMAD1)	RNA_polymerase_II_core_promoter_proximal_region_sequence-specific_DNA_binding
DNA binding	SMAD2	SMAD family member 2(SMAD2)	RNA_polymerase_II_core_promoter_proximal_region_sequence-specific_DNA_binding
DNA binding	SMAD3	SMAD family member 3(SMAD3)	RNA_polymerase_II_core_promoter_proximal_region_sequence-specific_DNA_binding
DNA binding	SMAD5	SMAD family member 5(SMAD5)	RNA_polymerase_II_core_promoter_proximal_region_sequence-specific_DNA_binding
DNA binding	TARDBP	TAR DNA binding protein(TARDBP)	RNA_polymerase_II_core_promoter_proximal_region_sequence-specific_DNA_binding
DNA binding	APP	amyloid beta precursor protein(APP)	RNA_polymerase_II_core_promoter_proximal_region_sequence-specific_DNA_binding
DNA binding	HNRNPU	heterogeneous nuclear ribonucleoprotein U(HNRNPU)	RNA_polymerase_II_core_promoter_proximal_region_sequence-specific_DNA_binding
DNA binding	HDAC1	histone deacetylase 1(HDAC1)	RNA_polymerase_II_core_promoter_proximal_region_sequence-specific_DNA_binding
DNA binding	MED8	mediator complex subunit 8(MED8)	RNA_polymerase_II_core_promoter_proximal_region_sequence-specific_DNA_binding
DNA binding	NR6A1	nuclear receptor subfamily 6 group A member 1(NR6A1)	RNA_polymerase_II_core_promoter_proximal_region_sequence-specific_DNA_binding
DNA binding	NFYA	nuclear transcription factor Y subunit alpha(NFYA)	RNA_polymerase_II_core_promoter_proximal_region_sequence-specific_DNA_binding
DNA binding	STAT1	signal transducer and activator of transcription 1(STAT1)	RNA_polymerase_II_core_promoter_proximal_region_sequence-specific_DNA_binding
DNA binding	THRAP3	thyroid hormone receptor associated protein 3(THRAP3)	RNA_polymerase_II_core_promoter_proximal_region_sequence-specific_DNA_binding
DNA binding	ZNF621	zinc finger protein 621(ZNF621)	RNA_polymerase_II_core_promoter_proximal_region_sequence-specific_DNA_binding

## Sheet: DLC_MS
Majority protein IDs	Fasta headers	iBAQ IgG	iBAQ DLC1	Unique peptides	Mol. weight [kDa]	Q-value	Score	Intensity
A0A0A0MQ61;Q08392	tr|A0A0A0MQ61|A0A0A0MQ61_CHICK Glutathione transferase OS=Gallus gallus OX=9031 GN=LOC100859645 PE=3 SV=1;sp|Q08392|GSTA1_CHICK Glutathione S-transferase OS=Gallus gallus OX=9031 PE=2 SV=1	NaN	22.6236	1	25.222	0	17.331	84011000
A0A1L1RM90;A0A1D5PJC9;A0A0E4B9S2;Q679P3;R4GKC8;A0A0E4BA89	tr|A0A1L1RM90|A0A1L1RM90_CHICK PDZ and LIM domain protein 7 OS=Gallus gallus OX=9031 GN=PDLIM7 PE=4 SV=2;tr|A0A1D5PJC9|A0A1D5PJC9_CHICK PDZ and LIM domain protein 7 OS=Gallus gallus OX=9031 GN=PDLIM7 PE=4 SV=1;tr|A0A0E4B9S2|A0A0E4B9S2_CHICK Enigma protein	NaN	20.6705	1	38.799	0.00046382	8.9258	31709000
A0A140T8F5	tr|A0A140T8F5|A0A140T8F5_CHICK Ig-like domain-containing protein OS=Gallus gallus OX=9031 GN=PIGR PE=4 SV=1	NaN	19.79	1	70.57	0	20.189	22663000
Q76I90;A0A140T8H9	sp|Q76I90|NUF2_CHICK Kinetochore protein Nuf2 OS=Gallus gallus OX=9031 GN=NUF2 PE=1 SV=1;tr|A0A140T8H9|A0A140T8H9_CHICK Kinetochore protein Nuf2 OS=Gallus gallus OX=9031 GN=NUF2 PE=3 SV=1	NaN	19.1361	2	55.126	0	12.35	14980000
A0A142EGP7	tr|A0A142EGP7|A0A142EGP7_CHICK Large neutral amino acids transporter small subunit 1 OS=Gallus gallus OX=9031 GN=SLC7A5 PE=2 SV=1	NaN	20.5407	1	56.833	0	120.24	25930000
F1NPQ2;A0A1C7CYU2	sp|F1NPQ2|MINP1_CHICK Multiple inositol polyphosphate phosphatase 1 OS=Gallus gallus OX=9031 GN=MINPP1 PE=1 SV=3;tr|A0A1C7CYU2|A0A1C7CYU2_CHICK 2,3-bisphosphoglycerate 3-phosphatase OS=Gallus gallus OX=9031 GN=MINPP1 PE=3 SV=2	NaN	17.7305	1	50.199	0.006729	5.807	5219500
A0A1D5NT61;P00368	tr|A0A1D5NT61|A0A1D5NT61_CHICK Glutamate dehydrogenase (NAD(P)(+)) OS=Gallus gallus OX=9031 GN=GLUD2 PE=3 SV=1;sp|P00368|DHE3_CHICK Glutamate dehydrogenase 1, mitochondrial OS=Gallus gallus OX=9031 GN=GLUD1 PE=1 SV=1	NaN	24.5768	15	60.861	0	189.18	775700000
A0A1D5NT72;O42479	tr|A0A1D5NT72|A0A1D5NT72_CHICK Ferrochelatase OS=Gallus gallus OX=9031 GN=FECH PE=3 SV=2;sp|O42479|HEMH_CHICK Ferrochelatase, mitochondrial OS=Gallus gallus OX=9031 GN=FECH PE=1 SV=1	NaN	23.086	7	45.983	0	51.098	213700000
A0A1L1RN08;A0A1D5NT90	tr|A0A1L1RN08|A0A1L1RN08_CHICK L-type lectin-like domain-containing protein OS=Gallus gallus OX=9031 GN=LMAN1L PE=4 SV=1;tr|A0A1D5NT90|A0A1D5NT90_CHICK L-type lectin-like domain-containing protein OS=Gallus gallus OX=9031 GN=LMAN1L PE=4 SV=1	NaN	24.9298	9	56.518	0	118.64	767060000
A0A1D5NTA0;A0A3Q2UMW0	tr|A0A1D5NTA0|A0A1D5NTA0_CHICK Ubiquitin thioesterase OS=Gallus gallus OX=9031 GN=OTUB1 PE=3 SV=1;tr|A0A3Q2UMW0|A0A3Q2UMW0_CHICK Ubiquitinyl hydrolase 1 OS=Gallus gallus OX=9031 GN=OTUB1 PE=4 SV=1	NaN	20.8466	2	31.176	0	16.516	26398000
A0A1D5NTB4;A0A1D5PC01;E1C2F7	tr|A0A1D5NTB4|A0A1D5NTB4_CHICK Uncharacterized protein OS=Gallus gallus OX=9031 GN=SMARCA2 PE=3 SV=1;tr|A0A1D5PC01|A0A1D5PC01_CHICK Uncharacterized protein OS=Gallus gallus OX=9031 GN=SMARCA2 PE=3 SV=1;tr|E1C2F7|E1C2F7_CHICK Uncharacterized protein OS=Gall	NaN	16.8465	1	176.74	0.0070975	5.8041	7188500
E1BTL1;A0A1D5NTB9;A0A3Q2UHN2	tr|E1BTL1|E1BTL1_CHICK Uncharacterized protein OS=Gallus gallus OX=9031 GN=CEP131 PE=4 SV=3;tr|A0A1D5NTB9|A0A1D5NTB9_CHICK Uncharacterized protein OS=Gallus gallus OX=9031 GN=CEP131 PE=4 SV=2;tr|A0A3Q2UHN2|A0A3Q2UHN2_CHICK Uncharacterized protein OS=Gallus	NaN	17.7496	3	124.49	0	21.029	13002000
A0A1D5NW88;A0A1D5NTC3	tr|A0A1D5NW88|A0A1D5NW88_CHICK Microtubule-associated protein OS=Gallus gallus OX=9031 GN=MAP4 PE=4 SV=2;tr|A0A1D5NTC3|A0A1D5NTC3_CHICK Microtubule-associated protein OS=Gallus gallus OX=9031 GN=MAP4 PE=4 SV=3	NaN	21.2816	4	111.7	0	59.131	132560000
A0A1D5PPT0;A0A1D5NTD3;Q98SH3	tr|A0A1D5PPT0|A0A1D5PPT0_CHICK Proteasomal ubiquitin receptor ADRM1 OS=Gallus gallus OX=9031 GN=ADRM1 PE=3 SV=1;tr|A0A1D5NTD3|A0A1D5NTD3_CHICK Proteasomal ubiquitin receptor ADRM1 OS=Gallus gallus OX=9031 GN=ADRM1 PE=3 SV=1;sp|Q98SH3|ADRM1_CHICK Proteasoma	NaN	24.5116	4	39.349	0	49.056	239180000
A0A1D5PY15;A0A1D5NTE5	tr|A0A1D5PY15|A0A1D5PY15_CHICK Coronin OS=Gallus gallus OX=9031 GN=LOC107056441 PE=3 SV=2;tr|A0A1D5NTE5|A0A1D5NTE5_CHICK Coronin OS=Gallus gallus OX=9031 GN=LOC107056441 PE=3 SV=2	NaN	23.9237	3	58.502	0	22.941	302350000
A0A3Q2TVA9;A0A1D5NTE9;A0A3Q2U7P5	tr|A0A3Q2TVA9|A0A3Q2TVA9_CHICK Peptidase S1 domain-containing protein OS=Gallus gallus OX=9031 GN=CFD PE=4 SV=1;tr|A0A1D5NTE9|A0A1D5NTE9_CHICK Peptidase S1 domain-containing protein OS=Gallus gallus OX=9031 GN=CFD PE=4 SV=2;tr|A0A3Q2U7P5|A0A3Q2U7P5_CHICK P	NaN	20.7472	1	49.504	0.00045005	8.019	33443000
A0A1D5NTG0	tr|A0A1D5NTG0|A0A1D5NTG0_CHICK MPN domain-containing protein OS=Gallus gallus OX=9031 GN=COPS5 PE=3 SV=1	NaN	20.2192	2	37.752	0	11.962	20750000
A0A1D5NTH5	tr|A0A1D5NTH5|A0A1D5NTH5_CHICK Uncharacterized protein OS=Gallus gallus OX=9031 GN=TWF1 PE=3 SV=2	NaN	18.1685	1	55.201	0.00044863	7.9271	8838900
A0A1L1RNQ9;A0A1D5NYJ9;A0A1D5PKY9;A0A1D5NTQ0;F1NLX2;A0A1D5NUL5;A0A1L1RLQ3	tr|A0A1L1RNQ9|A0A1L1RNQ9_CHICK Septin-type G domain-containing protein OS=Gallus gallus OX=9031 GN=SEPT6 PE=3 SV=2;tr|A0A1D5NYJ9|A0A1D5NYJ9_CHICK Septin-type G domain-containing protein OS=Gallus gallus OX=9031 GN=SEPT6 PE=3 SV=2;tr|A0A1D5PKY9|A0A1D5PKY9_C	NaN	25.7916	7	48	0	226.24	1161700000
A0A1D5NTR1	tr|A0A1D5NTR1|A0A1D5NTR1_CHICK Uncharacterized protein OS=Gallus gallus OX=9031 GN=CCDC6 PE=4 SV=1	NaN	17.6401	1	53.297	0.00082102	6.7055	4698300
Q4W5Z4;A0A1D5NTR2	sp|Q4W5Z4|DNM3A_CHICK DNA (cytosine-5)-methyltransferase 3A OS=Gallus gallus OX=9031 GN=DNMT3A PE=2 SV=1;tr|A0A1D5NTR2|A0A1D5NTR2_CHICK DNA (cytosine-5-)-methyltransferase OS=Gallus gallus OX=9031 GN=DNMT3A PE=2 SV=2	NaN	18.2776	1	98.943	0.0016142	6.4888	15888000
A0A1D5NTS9	tr|A0A1D5NTS9|A0A1D5NTS9_CHICK AH domain-containing protein OS=Gallus gallus OX=9031 GN=ARFIP2 PE=4 SV=2	NaN	19.9278	1	43.255	0.00044803	7.9024	17954000
Q5ZHX7;A0A1D5NTT2	sp|Q5ZHX7|NB5R2_CHICK NADH-cytochrome b5 reductase 2 OS=Gallus gallus OX=9031 GN=CYB5R2 PE=2 SV=1;tr|A0A1D5NTT2|A0A1D5NTT2_CHICK NADH-cytochrome b5 reductase OS=Gallus gallus OX=9031 GN=CYB5R2 PE=3 SV=1	NaN	20.7258	2	33.607	0	11.013	29482000
E1BYN7;A0A1D5NTT4	tr|E1BYN7|E1BYN7_CHICK Voltage-dependent anion-selective channel protein 1 OS=Gallus gallus OX=9031 GN=VDAC1 PE=3 SV=1;tr|A0A1D5NTT4|A0A1D5NTT4_CHICK Voltage-dependent anion-selective channel protein 1 OS=Gallus gallus OX=9031 GN=VDAC1 PE=3 SV=2	NaN	22.2563	2	30.706	0	16.227	85167000
A0A1D5NTU6	tr|A0A1D5NTU6|A0A1D5NTU6_CHICK Protein argonaute-2 OS=Gallus gallus OX=9031 GN=AGO2 PE=3 SV=2	NaN	17.9458	1	97.831	0.00047304	9.6565	12876000
A0A1D5NTU8;A0A1L1RZ04;A0A1L1RNH7;Q6PVZ5	tr|A0A1D5NTU8|A0A1D5NTU8_CHICK IF rod domain-containing protein OS=Gallus gallus OX=9031 PE=3 SV=2;tr|A0A1L1RZ04|A0A1L1RZ04_CHICK IF rod domain-containing protein OS=Gallus gallus OX=9031 PE=3 SV=2;tr|A0A1L1RNH7|A0A1L1RNH7_CHICK IF rod domain-containing pr	22.442	22.1266	1	57.438	0	36.2	287760000
A0A3Q2U999;A0A1L1RNT4;A0A3Q2TZU1;A0A1L1S087;A0A3Q2U7C1;A0A1D5NTW6	tr|A0A3Q2U999|A0A3Q2U999_CHICK Uncharacterized protein OS=Gallus gallus OX=9031 PE=4 SV=1;tr|A0A1L1RNT4|A0A1L1RNT4_CHICK Uncharacterized protein OS=Gallus gallus OX=9031 PE=4 SV=2;tr|A0A3Q2TZU1|A0A3Q2TZU1_CHICK Uncharacterized protein OS=Gallus gallus OX=9	NaN	23.834	1	13.768	0.00043328	7.3753	134590000
A0A1D5NTX7	tr|A0A1D5NTX7|A0A1D5NTX7_CHICK Seryl-tRNA synthetase OS=Gallus gallus OX=9031 GN=SARS2 PE=3 SV=2	NaN	21.6147	5	54.476	0	58.777	96338000
F1NT10;A0A1D5NTY1	tr|F1NT10|F1NT10_CHICK Uncharacterized protein OS=Gallus gallus OX=9031 GN=TCERG1 PE=4 SV=2;tr|A0A1D5NTY1|A0A1D5NTY1_CHICK Uncharacterized protein OS=Gallus gallus OX=9031 GN=TCERG1 PE=4 SV=1	NaN	21.6215	5	109.94	0	51.719	116150000
Q02391;A0A1D5NTY2	sp|Q02391|GSLG1_CHICK Golgi apparatus protein 1 OS=Gallus gallus OX=9031 GN=GLG1 PE=1 SV=1;tr|A0A1D5NTY2|A0A1D5NTY2_CHICK Golgi apparatus protein 1 OS=Gallus gallus OX=9031 GN=GLG1 PE=4 SV=1	NaN	19.3327	3	129.71	0	19.328	40937000
Q5ZMU9;A0A1D5NTY5;A0A1D5P448;A0A1D5PXG2;A0A1D5PF52;A0A1D5P8L6	tr|Q5ZMU9|Q5ZMU9_CHICK Transitional endoplasmic reticulum ATPase OS=Gallus gallus OX=9031 GN=VCP PE=2 SV=1;tr|A0A1D5NTY5|A0A1D5NTY5_CHICK Transitional endoplasmic reticulum ATPase OS=Gallus gallus OX=9031 GN=LOC430766 PE=3 SV=2;tr|A0A1D5P448|A0A1D5P448_CHI	NaN	25.6517	29	89.324	0	323.31	2372100000
A0A1D5NTZ7	tr|A0A1D5NTZ7|A0A1D5NTZ7_CHICK Uncharacterized protein OS=Gallus gallus OX=9031 GN=MRPL27 PE=3 SV=1	NaN	21.1017	2	15.048	0	21.065	15753000
A0A1D5NTZ8	tr|A0A1D5NTZ8|A0A1D5NTZ8_CHICK Leucyl-tRNA synthetase OS=Gallus gallus OX=9031 GN=LARS2 PE=3 SV=1	NaN	19.1088	2	104.42	0	10.966	29398000
F1P3F5;A0A1D5NU12	tr|F1P3F5|F1P3F5_CHICK Protein numb homolog OS=Gallus gallus OX=9031 GN=NUMB PE=4 SV=2;tr|A0A1D5NU12|A0A1D5NU12_CHICK Protein numb homolog OS=Gallus gallus OX=9031 GN=NUMB PE=4 SV=1	NaN	19.9792	1	63.242	0.00044425	7.7513	20673000
F1NMZ1;A0A1D5NU15;A0A3Q2TUA2;A0A3Q3AEY0;A0A3Q2U6B6	tr|F1NMZ1|F1NMZ1_CHICK Uncharacterized protein OS=Gallus gallus OX=9031 GN=MAGI1 PE=4 SV=4;tr|A0A1D5NU15|A0A1D5NU15_CHICK Uncharacterized protein OS=Gallus gallus OX=9031 GN=MAGI1 PE=4 SV=2;tr|A0A3Q2TUA2|A0A3Q2TUA2_CHICK Uncharacterized protein OS=Gallus g	NaN	18.8683	1	136.97	0	12.737	23927000
A0A1L1RW70;Q5ZLM1;A0A1D5NU17	tr|A0A1L1RW70|A0A1L1RW70_CHICK YTH domain-containing protein OS=Gallus gallus OX=9031 GN=YTHDF3 PE=4 SV=2;tr|Q5ZLM1|Q5ZLM1_CHICK YTH domain-containing protein OS=Gallus gallus OX=9031 GN=YTHDF3 PE=2 SV=1;tr|A0A1D5NU17|A0A1D5NU17_CHICK YTH domain-containing	NaN	20.5736	2	62.117	0	23.576	29649000
A0A3Q2UBG9;A0A1D5P8X0;A0A1D5NU31;F1NMW9	tr|A0A3Q2UBG9|A0A3Q2UBG9_CHICK Uncharacterized protein OS=Gallus gallus OX=9031 GN=ARL15 PE=4 SV=1;tr|A0A1D5P8X0|A0A1D5P8X0_CHICK Uncharacterized protein OS=Gallus gallus OX=9031 GN=ARL15 PE=4 SV=2;tr|A0A1D5NU31|A0A1D5NU31_CHICK Uncharacterized protein OS=	NaN	20.7743	2	21.034	0	12.275	16140000
A0A1D5PPA0;Q90623;A0A1D5NU36;F1NA71	tr|A0A1D5PPA0|A0A1D5PPA0_CHICK Protein phosphatase 1 regulatory subunit OS=Gallus gallus OX=9031 GN=PPP1R12A PE=4 SV=2;sp|Q90623|MYPT1_CHICK Protein phosphatase 1 regulatory subunit 12A OS=Gallus gallus OX=9031 GN=PPP1R12A PE=1 SV=1;tr|A0A1D5NU36|A0A1D5NU3	NaN	20.8564	3	108.63	0	36.097	89224000
A0A1D5NU82	tr|A0A1D5NU82|A0A1D5NU82_CHICK Tubulin gamma chain OS=Gallus gallus OX=9031 GN=TUBG1 PE=3 SV=2	NaN	22.6209	2	50.331	0	14.385	103200000
A0A3Q2UGJ5;F1NH66;A0A1D5NU87;A0A1D5PVG7;A0A3Q2UD04;A0A3Q2UFH9	tr|A0A3Q2UGJ5|A0A3Q2UGJ5_CHICK Uncharacterized protein OS=Gallus gallus OX=9031 GN=EML4 PE=3 SV=1;tr|F1NH66|F1NH66_CHICK Uncharacterized protein OS=Gallus gallus OX=9031 GN=EML4 PE=3 SV=2;tr|A0A1D5NU87|A0A1D5NU87_CHICK Uncharacterized protein OS=Gallus gal	NaN	22.3699	6	105.89	0	43.723	249330000
A0A1D5NUA6	tr|A0A1D5NUA6|A0A1D5NUA6_CHICK RNA binding motif protein 34 OS=Gallus gallus OX=9031 PE=4 SV=1	NaN	20.4472	1	31.448	0.0030972	6.0852	21443000
A0A1D5NUD9;A0A1D5NWG1;A0A1D5PC74;E1BWR0;A0A1D5PQS6;A0A3Q2UE21	tr|A0A1D5NUD9|A0A1D5NUD9_CHICK Uncharacterized protein OS=Gallus gallus OX=9031 GN=BCLAF1 PE=3 SV=1;tr|A0A1D5NWG1|A0A1D5NWG1_CHICK Uncharacterized protein OS=Gallus gallus OX=9031 GN=BCLAF1 PE=3 SV=1;tr|A0A1D5PC74|A0A1D5PC74_CHICK Uncharacterized protein O	NaN	21.6264	3	86.636	0	26.299	97122000
A0A1D5P763;A0A1D5NUH1	tr|A0A1D5P763|A0A1D5P763_CHICK PITH domain-containing protein OS=Gallus gallus OX=9031 GN=TXNL1 PE=4 SV=1;tr|A0A1D5NUH1|A0A1D5NUH1_CHICK PITH domain-containing protein OS=Gallus gallus OX=9031 GN=TXNL1 PE=4 SV=1	NaN	24.2763	6	32.448	0	146.92	304770000
H9L0G3;A0A3Q3AN84;Q8UWF3;A0A1D5NUH3	tr|H9L0G3|H9L0G3_CHICK Mothers against decapentaplegic homolog OS=Gallus gallus OX=9031 GN=LOC769000 PE=3 SV=3;tr|A0A3Q3AN84|A0A3Q3AN84_CHICK Mothers against decapentaplegic homolog OS=Gallus gallus OX=9031 GN=SMAD2Z PE=3 SV=1;tr|Q8UWF3|Q8UWF3_CHICK Mother	NaN	21.5818	2	47.849	0	32.347	53362000
Q5ZJZ2;A0A1D5NUI1	tr|Q5ZJZ2|Q5ZJZ2_CHICK Uncharacterized protein OS=Gallus gallus OX=9031 GN=RPL3 PE=2 SV=1;tr|A0A1D5NUI1|A0A1D5NUI1_CHICK Uncharacterized protein OS=Gallus gallus OX=9031 GN=RPL3 PE=3 SV=2	NaN	26.5935	13	46.085	0	131.88	1923900000
A0A1D5NUJ3	tr|A0A1D5NUJ3|A0A1D5NUJ3_CHICK 2-oxoisovalerate dehydrogenase subunit alpha OS=Gallus gallus OX=9031 GN=BCKDHA PE=3 SV=2	NaN	22.7506	5	50.22	0	83.54	183480000
A0A1D5NUK5;A0A1L1RU55	tr|A0A1D5NUK5|A0A1D5NUK5_CHICK Adenine phosphoribosyltransferase OS=Gallus gallus OX=9031 GN=APRT PE=3 SV=1;tr|A0A1L1RU55|A0A1L1RU55_CHICK Adenine phosphoribosyltransferase OS=Gallus gallus OX=9031 GN=APRT PE=3 SV=2	NaN	21.5072	3	19.521	0	17.389	38749000
A0A3Q2UDK3;A0A3Q2TXR3;Q5ZLR6;A0A1D5PAX8;F1NEF5;A0A1D5NUM7;A0A3Q2TT34;A0A3Q3API9;A0A3Q2TZR1	tr|A0A3Q2UDK3|A0A3Q2UDK3_CHICK Rho guanine nucleotide exchange factor 6 OS=Gallus gallus OX=9031 GN=ARHGEF6 PE=4 SV=1;tr|A0A3Q2TXR3|A0A3Q2TXR3_CHICK Rho guanine nucleotide exchange factor 6 OS=Gallus gallus OX=9031 GN=ARHGEF6 PE=4 SV=1;sp|Q5ZLR6|ARHG6_CHIC	NaN	18.3696	1	80.766	0.00047192	9.5848	13548000
A0A1D5NUQ4	tr|A0A1D5NUQ4|A0A1D5NUQ4_CHICK Ribos_L4_asso_C domain-containing protein OS=Gallus gallus OX=9031 GN=RPL4 PE=3 SV=2	NaN	26.8401	14	43.888	0	303.62	1802100000
A0A1D5NUQ6	tr|A0A1D5NUQ6|A0A1D5NUQ6_CHICK Uncharacterized protein OS=Gallus gallus OX=9031 GN=C7H2ORF47 PE=4 SV=2	NaN	21.0152	1	27.837	0.00085034	7.1684	38149000
A0A1D5NUW2	tr|A0A1D5NUW2|A0A1D5NUW2_CHICK Phosvitin OS=Gallus gallus OX=9031 GN=VTG1 PE=4 SV=1	22.2319	28.0428	1	210.68	0	323.31	28707000000
A0A1D5NUY2	tr|A0A1D5NUY2|A0A1D5NUY2_CHICK Kinesin motor domain-containing protein OS=Gallus gallus OX=9031 GN=KIF11 PE=3 SV=2	NaN	18.42	1	119.8	0.0020169	6.479	23498000
A0A1D5NUY5;A0A1D5P797;A0A1D5PJY1	tr|A0A1D5NUY5|A0A1D5NUY5_CHICK Spectrin beta chain OS=Gallus gallus OX=9031 GN=SPTBN1 PE=3 SV=2;tr|A0A1D5P797|A0A1D5P797_CHICK Spectrin beta chain OS=Gallus gallus OX=9031 GN=SPTBN1 PE=3 SV=2;tr|A0A1D5PJY1|A0A1D5PJY1_CHICK Spectrin beta chain OS=Gallus gal	NaN	19.5138	2	257.14	0	18.448	102560000
A0A1D5NUY6;Q6Q122	tr|A0A1D5NUY6|A0A1D5NUY6_CHICK NADH dehydrogenase [ubiquinone] 1 subunit C2 OS=Gallus gallus OX=9031 GN=NDUFC2 PE=3 SV=1;tr|Q6Q122|Q6Q122_CHICK NADH dehydrogenase [ubiquinone] 1 subunit C2 OS=Gallus gallus OX=9031 GN=NDUFC2 PE=2 SV=1	NaN	24.1469	3	12.774	0	20.651	130030000
A0A1D5NV17	tr|A0A1D5NV17|A0A1D5NV17_CHICK Uncharacterized protein OS=Gallus gallus OX=9031 GN=ACTBL2 PE=3 SV=1	NaN	19.7887	1	42.014	1	-2	18114000
A0A1D5PQ87;A0A3Q2UDW7;A0A3Q2TZR5;F1NWE3;A0A452J7R1;A0A1D5PW29;A0A1D5PPA5;A0A1D5NV24;A0A1D5PT51	tr|A0A1D5PQ87|A0A1D5PQ87_CHICK Protein-tyrosine-phosphatase OS=Gallus gallus OX=9031 GN=PTPRS PE=3 SV=2;tr|A0A3Q2UDW7|A0A3Q2UDW7_CHICK Protein-tyrosine-phosphatase OS=Gallus gallus OX=9031 GN=PTPRS PE=3 SV=1;tr|A0A3Q2TZR5|A0A3Q2TZR5_CHICK Protein-tyrosine-	NaN	18.2462	1	168.3	0	13.485	19899000
A0A1D5NV31	tr|A0A1D5NV31|A0A1D5NV31_CHICK RRM domain-containing protein OS=Gallus gallus OX=9031 PE=4 SV=2	NaN	23.4099	3	14.47	0	36.165	100300000
F1NZX7;A0A1D5NV38;A0A1D5PZ41	tr|F1NZX7|F1NZX7_CHICK Sorting nexin-2 OS=Gallus gallus OX=9031 GN=SNX2 PE=3 SV=4;tr|A0A1D5NV38|A0A1D5NV38_CHICK Sorting nexin-2 OS=Gallus gallus OX=9031 GN=SNX2 PE=3 SV=2;tr|A0A1D5PZ41|A0A1D5PZ41_CHICK Sorting nexin-2 OS=Gallus gallus OX=9031 GN=SNX2 PE=3	NaN	21.9716	4	66.529	0	85.966	131600000
A0A1D5NV58;A0A3Q2U5P0;A0A3Q2UGE9;A0A3Q2TX91	tr|A0A1D5NV58|A0A1D5NV58_CHICK BAT2_N domain-containing protein OS=Gallus gallus OX=9031 GN=PRRC2C PE=4 SV=2;tr|A0A3Q2U5P0|A0A3Q2U5P0_CHICK BAT2_N domain-containing protein OS=Gallus gallus OX=9031 GN=PRRC2C PE=4 SV=1;tr|A0A3Q2UGE9|A0A3Q2UGE9_CHICK BAT2_N	NaN	20.6492	3	293.35	0	27.553	154580000
A0A1D5NV60;A0A3S5ZPB6;A0A1L1RZN9	tr|A0A1D5NV60|A0A1D5NV60_CHICK Uncharacterized protein OS=Gallus gallus OX=9031 GN=VPS33B PE=3 SV=2;tr|A0A3S5ZPB6|A0A3S5ZPB6_CHICK Uncharacterized protein OS=Gallus gallus OX=9031 GN=VPS33B PE=3 SV=1;tr|A0A1L1RZN9|A0A1L1RZN9_CHICK Uncharacterized protein O	NaN	17.1008	1	67.277	0.00122	6.5802	4779100
A0A1D5NV75;A0A1D5NUZ0	tr|A0A1D5NV75|A0A1D5NV75_CHICK Uncharacterized protein OS=Gallus gallus OX=9031 GN=NAPA PE=3 SV=2;tr|A0A1D5NUZ0|A0A1D5NUZ0_CHICK Uncharacterized protein OS=Gallus gallus OX=9031 GN=NAPA PE=3 SV=2	NaN	24.3913	11	33.244	0	124.14	396070000
A0A1D5NV93	tr|A0A1D5NV93|A0A1D5NV93_CHICK Pyrroline-5-carboxylate reductase OS=Gallus gallus OX=9031 GN=PYCRL PE=3 SV=2	NaN	21.4023	2	28.481	0	13.911	41574000
A0A3Q3AZZ3;E1C866;A0A1D5NV94	tr|A0A3Q3AZZ3|A0A3Q3AZZ3_CHICK AP-2 complex subunit alpha OS=Gallus gallus OX=9031 GN=AP2A2 PE=3 SV=1;tr|E1C866|E1C866_CHICK AP-2 complex subunit alpha OS=Gallus gallus OX=9031 GN=AP2A2 PE=3 SV=3;tr|A0A1D5NV94|A0A1D5NV94_CHICK AP-2 complex subunit alpha OS	NaN	22.0763	11	95.718	0	71.224	212260000
A0A1D5PCS6;A0A1D5NVE0	tr|A0A1D5PCS6|A0A1D5PCS6_CHICK YJU2 splicing factor homolog OS=Gallus gallus OX=9031 PE=3 SV=2;tr|A0A1D5NVE0|A0A1D5NVE0_CHICK YJU2 splicing factor homolog OS=Gallus gallus OX=9031 PE=3 SV=2	NaN	21.1459	1	36.717	0.00082645	6.796	37125000
A0A1D5NVE9	tr|A0A1D5NVE9|A0A1D5NVE9_CHICK Uncharacterized protein OS=Gallus gallus OX=9031 GN=MPP2 PE=3 SV=2	NaN	21.2909	1	62.292	0.0053517	5.9945	76970000
A0A1D5NVI1	tr|A0A1D5NVI1|A0A1D5NVI1_CHICK 60S ribosomal protein L9 OS=Gallus gallus OX=9031 GN=RPL9 PE=3 SV=1	NaN	25.9057	6	21.835	0	63.667	565760000
A0A1D5NVM2	tr|A0A1D5NVM2|A0A1D5NVM2_CHICK NADH dehydrogenase [ubiquinone] 1 alpha subcomplex subunit 2 OS=Gallus gallus OX=9031 GN=NDUFA2 PE=3 SV=1	NaN	22.0849	2	11.071	0	14.752	31139000
A0A1D5NVN9	tr|A0A1D5NVN9|A0A1D5NVN9_CHICK Uncharacterized protein OS=Gallus gallus OX=9031 GN=MAPK1IP1L PE=3 SV=2	NaN	25.0018	1	24.916	0	69.642	33597000
A0A1D5NVT8	tr|A0A1D5NVT8|A0A1D5NVT8_CHICK Elongator complex protein 2 OS=Gallus gallus OX=9031 GN=ELP2 PE=3 SV=1	NaN	17.4106	1	101.06	0.0008507	7.1685	7492100
A0A1D5P5D9;A0A1D5NVZ1;A0A3Q2UIB1	tr|A0A1D5P5D9|A0A1D5P5D9_CHICK Uncharacterized protein OS=Gallus gallus OX=9031 GN=FAM120C PE=3 SV=2;tr|A0A1D5NVZ1|A0A1D5NVZ1_CHICK Uncharacterized protein OS=Gallus gallus OX=9031 GN=FAM120C PE=3 SV=2;tr|A0A3Q2UIB1|A0A3Q2UIB1_CHICK Uncharacterized protein	NaN	18.6254	3	117.86	0	20.135	21432000
A0A1D5NVZ7;A0A3Q2UDL9;A0A1D5NZ02	tr|A0A1D5NVZ7|A0A1D5NVZ7_CHICK TPR_REGION domain-containing protein OS=Gallus gallus OX=9031 GN=EMC2 PE=3 SV=2;tr|A0A3Q2UDL9|A0A3Q2UDL9_CHICK TPR_REGION domain-containing protein OS=Gallus gallus OX=9031 GN=EMC2 PE=3 SV=1;tr|A0A1D5NZ02|A0A1D5NZ02_CHICK TPR	NaN	22.6547	3	34.313	0	28.621	85841000
A0A1D5NW10;A0A3Q2U6A0;E1BTS5;A0A3Q3A3M8	tr|A0A1D5NW10|A0A1D5NW10_CHICK Uncharacterized protein OS=Gallus gallus OX=9031 GN=STXBP3 PE=3 SV=2;tr|A0A3Q2U6A0|A0A3Q2U6A0_CHICK Uncharacterized protein OS=Gallus gallus OX=9031 GN=STXBP3 PE=3 SV=1;tr|E1BTS5|E1BTS5_CHICK Uncharacterized protein OS=Gallus	NaN	20.1462	2	61.336	0	11.995	32491000
A0A1D5NW15;A0A1D5NWL7	tr|A0A1D5NW15|A0A1D5NW15_CHICK Protein kinase domain-containing protein OS=Gallus gallus OX=9031 GN=AAK1 PE=4 SV=2;tr|A0A1D5NWL7|A0A1D5NWL7_CHICK Protein kinase domain-containing protein OS=Gallus gallus OX=9031 GN=AAK1 PE=4 SV=2	NaN	18.3469	1	48.982	0.001218	6.5385	7334600
A0A1D5NW27;P02552;F1NWX0	tr|A0A1D5NW27|A0A1D5NW27_CHICK Tubulin alpha chain OS=Gallus gallus OX=9031 GN=TUBA1A PE=3 SV=1;sp|P02552|TBA1_CHICK Tubulin alpha-1 chain (Fragment) OS=Gallus gallus OX=9031 PE=1 SV=1;tr|F1NWX0|F1NWX0_CHICK Tubulin alpha chain OS=Gallus gallus OX=9031 GN=	23.7021	29.2615	0	50.135	0	323.31	13802000000
A0A1D5NW43	tr|A0A1D5NW43|A0A1D5NW43_CHICK ESCRT-II complex subunit VPS25 OS=Gallus gallus OX=9031 GN=VPS25 PE=3 SV=1	NaN	21.5143	1	20.404	0	14.966	29953000
A0A1D5NW46;F1NM39;A0A1D5PXE3;P56519	tr|A0A1D5NW46|A0A1D5NW46_CHICK Histone deacetylase 2 OS=Gallus gallus OX=9031 GN=HDAC2 PE=3 SV=1;tr|F1NM39|F1NM39_CHICK Histone deacetylase 2 OS=Gallus gallus OX=9031 GN=HDAC2 PE=3 SV=1;tr|A0A1D5PXE3|A0A1D5PXE3_CHICK Histone deacetylase 2 OS=Gallus gallus	NaN	24.4775	3	51.938	0	42.15	420480000
A0A1D5NW86	tr|A0A1D5NW86|A0A1D5NW86_CHICK Uncharacterized protein OS=Gallus gallus OX=9031 GN=FBN3 PE=3 SV=3	19.4703	20.0953	3	324.63	0	24.268	238200000
A0A1D5NW93	tr|A0A1D5NW93|A0A1D5NW93_CHICK ATP synthase F1 subunit delta OS=Gallus gallus OX=9031 GN=ATP5D PE=3 SV=2	NaN	23.5186	3	16.817	0	17.569	72101000
A0A1D5NWB1	tr|A0A1D5NWB1|A0A1D5NWB1_CHICK LIM zinc-binding domain-containing protein OS=Gallus gallus OX=9031 GN=LIMD2 PE=4 SV=2	NaN	22.3575	1	16.5	0	62.992	48364000
A0A1D5NWC1	tr|A0A1D5NWC1|A0A1D5NWC1_CHICK WW domain-containing protein OS=Gallus gallus OX=9031 GN=WAC PE=4 SV=1	NaN	20.1636	2	70.451	0	24.444	34060000
A0A1D5NWE8	tr|A0A1D5NWE8|A0A1D5NWE8_CHICK Transcription initiation factor IIE subunit alpha OS=Gallus gallus OX=9031 GN=GTF2E1 PE=3 SV=2	NaN	21.6395	2	46.403	0	30.942	62071000
F1P2P4;A0A3Q2TUU0;A0A1D5NWH8	tr|F1P2P4|F1P2P4_CHICK ATP-dependent (S)-NAD(P)H-hydrate dehydratase OS=Gallus gallus OX=9031 GN=NAXD PE=3 SV=4;tr|A0A3Q2TUU0|A0A3Q2TUU0_CHICK ATP-dependent (S)-NAD(P)H-hydrate dehydratase OS=Gallus gallus OX=9031 GN=NAXD PE=3 SV=1;tr|A0A1D5NWH8|A0A1D5NWH8	NaN	19.3091	2	36.525	0	11.85	13640000
A0A1D5NWH9	tr|A0A1D5NWH9|A0A1D5NWH9_CHICK CSD_1 domain-containing protein OS=Gallus gallus OX=9031 GN=YBX3 PE=4 SV=2	NaN	24.5778	6	30.873	0	222.62	250410000
A0A1D5PKL4;A0A1D5NWI9;A0A3Q2TVR8	tr|A0A1D5PKL4|A0A1D5PKL4_CHICK Uncharacterized protein OS=Gallus gallus OX=9031 GN=R3HDM2 PE=4 SV=2;tr|A0A1D5NWI9|A0A1D5NWI9_CHICK Uncharacterized protein OS=Gallus gallus OX=9031 GN=R3HDM2 PE=4 SV=2;tr|A0A3Q2TVR8|A0A3Q2TVR8_CHICK Uncharacterized protein O	NaN	17.7119	1	114.72	0.0067593	5.8355	5796600
A0A1D5NWJ7	tr|A0A1D5NWJ7|A0A1D5NWJ7_CHICK Uncharacterized protein OS=Gallus gallus OX=9031 GN=COX7A2L PE=3 SV=1	NaN	23.9919	4	12.614	0	64.299	116780000
A0A1D5NWM7	tr|A0A1D5NWM7|A0A1D5NWM7_CHICK Uncharacterized protein OS=Gallus gallus OX=9031 GN=RSL1D1 PE=4 SV=1	NaN	23.937	5	49.601	0	38.997	385440000
A0A1D5NWN5	tr|A0A1D5NWN5|A0A1D5NWN5_CHICK Deacetylase sirtuin-type domain-containing protein OS=Gallus gallus OX=9031 GN=SIRT2 PE=4 SV=2	NaN	17.5193	1	52.217	0.00044267	7.6961	5072200
A0A1D5P062;A0A1D5NWP2	tr|A0A1D5P062|A0A1D5P062_CHICK SAM domain-containing protein OS=Gallus gallus OX=9031 GN=STIM1 PE=4 SV=1;tr|A0A1D5NWP2|A0A1D5NWP2_CHICK SAM domain-containing protein OS=Gallus gallus OX=9031 GN=STIM1 PE=4 SV=2	NaN	21.876	5	76.41	0	38.834	127010000
E1BQE4;A0A1D5NWP6	tr|E1BQE4|E1BQE4_CHICK Uncharacterized protein OS=Gallus gallus OX=9031 GN=RBM26 PE=4 SV=2;tr|A0A1D5NWP6|A0A1D5NWP6_CHICK Uncharacterized protein OS=Gallus gallus OX=9031 GN=RBM26 PE=4 SV=1	NaN	19.9642	2	110.06	0	27.284	33755000
A0A1D5NWQ3;A0A3Q3AVI8	tr|A0A1D5NWQ3|A0A1D5NWQ3_CHICK SRP54 domain-containing protein OS=Gallus gallus OX=9031 GN=SRPRA PE=3 SV=1;tr|A0A3Q3AVI8|A0A3Q3AVI8_CHICK Uncharacterized protein OS=Gallus gallus OX=9031 GN=SRPRA PE=4 SV=1	NaN	22.3334	8	71.197	0	126.23	200820000
F1NUQ5;A0A1D5NWQ5;A0A1D5PIK1	tr|F1NUQ5|F1NUQ5_CHICK Uncharacterized protein OS=Gallus gallus OX=9031 GN=EIF4E2 PE=3 SV=2;tr|A0A1D5NWQ5|A0A1D5NWQ5_CHICK Uncharacterized protein OS=Gallus gallus OX=9031 GN=EIF4E2 PE=3 SV=1;tr|A0A1D5PIK1|A0A1D5PIK1_CHICK Uncharacterized protein OS=Gallus	NaN	18.1044	1	27.107	0.002341	6.1566	3381700
A0A1D5NWS0;A0A3Q2U926;A0A1D5PAN4	tr|A0A1D5NWS0|A0A1D5NWS0_CHICK Asp-B-Hydro_N domain-containing protein OS=Gallus gallus OX=9031 GN=ASPH PE=4 SV=2;tr|A0A3Q2U926|A0A3Q2U926_CHICK Asp-B-Hydro_N domain-containing protein OS=Gallus gallus OX=9031 GN=ASPH PE=4 SV=1;tr|A0A1D5PAN4|A0A1D5PAN4_CHI	NaN	20.741	2	39.041	0	23.586	14020000
A0A1D5PTW8;A0A1D5NWT4	tr|A0A1D5PTW8|A0A1D5PTW8_CHICK Non-specific serine/threonine protein kinase OS=Gallus gallus OX=9031 GN=RPS6KA3 PE=3 SV=2;tr|A0A1D5NWT4|A0A1D5NWT4_CHICK Ribosomal protein S6 kinase OS=Gallus gallus OX=9031 GN=RPS6KA3 PE=3 SV=1	NaN	17.8959	1	80.517	0.00043706	7.5165	9999600
A0A1D5NWV6;A0A1D5P934	tr|A0A1D5NWV6|A0A1D5NWV6_CHICK Uncharacterized protein OS=Gallus gallus OX=9031 GN=SNX27 PE=4 SV=2;tr|A0A1D5P934|A0A1D5P934_CHICK Uncharacterized protein OS=Gallus gallus OX=9031 GN=SNX27 PE=4 SV=1	NaN	19.3662	4	60.32	0	37.403	18922000
A0A1D5NWX8	tr|A0A1D5NWX8|A0A1D5NWX8_CHICK RING-type domain-containing protein OS=Gallus gallus OX=9031 GN=MEX3A PE=4 SV=2	NaN	21.0487	3	56.56	0	41.671	54228000
A0A1D5PB11;A0A1D5NWX9	tr|A0A1D5PB11|A0A1D5PB11_CHICK Uncharacterized protein OS=Gallus gallus OX=9031 GN=TJP1 PE=4 SV=1;tr|A0A1D5NWX9|A0A1D5NWX9_CHICK Uncharacterized protein OS=Gallus gallus OX=9031 GN=TJP1 PE=4 SV=1	NaN	21.0074	7	189.49	0	52.454	191820000
A0A1D5NX04;A0A3Q2UIG5;F1P569	tr|A0A1D5NX04|A0A1D5NX04_CHICK Uncharacterized protein OS=Gallus gallus OX=9031 GN=REPS1 PE=4 SV=2;tr|A0A3Q2UIG5|A0A3Q2UIG5_CHICK Uncharacterized protein OS=Gallus gallus OX=9031 GN=REPS1 PE=4 SV=1;tr|F1P569|F1P569_CHICK Uncharacterized protein OS=Gallus g	NaN	18.9377	2	83.991	0	13.157	19081000
A0A1D5NX25;A0A3Q3ADU5;F1NIB4	tr|A0A1D5NX25|A0A1D5NX25_CHICK Uncharacterized protein OS=Gallus gallus OX=9031 GN=HNRNPAB PE=4 SV=1;tr|A0A3Q3ADU5|A0A3Q3ADU5_CHICK Uncharacterized protein OS=Gallus gallus OX=9031 GN=HNRNPAB PE=4 SV=1;tr|F1NIB4|F1NIB4_CHICK Uncharacterized protein OS=Gall	NaN	27.174	9	39.267	0	75.46	1817100000
A0A1D5NX61;E1BWJ6;A0A1D5PP09;A0A1D5PT17	tr|A0A1D5NX61|A0A1D5NX61_CHICK Uncharacterized protein OS=Gallus gallus OX=9031 GN=ABI2 PE=3 SV=2;tr|E1BWJ6|E1BWJ6_CHICK Uncharacterized protein OS=Gallus gallus OX=9031 GN=ABI2 PE=3 SV=4;tr|A0A1D5PP09|A0A1D5PP09_CHICK Uncharacterized protein OS=Gallus gal	NaN	19.2962	1	49.376	0.0008471	7.1184	11588000
A0A1D5NX82;F1NIR6	tr|A0A1D5NX82|A0A1D5NX82_CHICK Nuclear cap-binding protein subunit 2 OS=Gallus gallus OX=9031 GN=NCBP2 PE=3 SV=1;tr|F1NIR6|F1NIR6_CHICK Nuclear cap-binding protein subunit 2 OS=Gallus gallus OX=9031 GN=NCBP2 PE=3 SV=3	NaN	24.1505	2	18.07	0	18.905	148970000
A0A1D5NX83	tr|A0A1D5NX83|A0A1D5NX83_CHICK PHD finger protein 10 OS=Gallus gallus OX=9031 GN=PHF10 PE=3 SV=3	NaN	19.0479	1	55.842	0	13.198	11382000
A0A1D5NX87	tr|A0A1D5NX87|A0A1D5NX87_CHICK tRNA selenocysteine 1-associated protein 1 OS=Gallus gallus OX=9031 GN=C2H6orf52 PE=3 SV=1	NaN	21.0384	1	30.265	0.0031068	6.1152	19383000
A0A1D5NX91	tr|A0A1D5NX91|A0A1D5NX91_CHICK IRF-2BP1_2 domain-containing protein OS=Gallus gallus OX=9031 GN=C5H14orf4 PE=3 SV=1	NaN	21.7597	6	76.513	0	113.05	142030000
A0A1D5NXA0;A0A3Q2U718	tr|A0A1D5NXA0|A0A1D5NXA0_CHICK NADPH:adrenodoxin oxidoreductase, mitochondrial OS=Gallus gallus OX=9031 GN=FDXR PE=3 SV=1;tr|A0A3Q2U718|A0A3Q2U718_CHICK NADPH:adrenodoxin oxidoreductase, mitochondrial OS=Gallus gallus OX=9031 GN=FDXR PE=3 SV=1	NaN	20.3152	2	51.246	0	11.754	33920000
A0A1D5NXB3;A0A1D5P2P2	tr|A0A1D5NXB3|A0A1D5NXB3_CHICK RNA binding motif protein 4 OS=Gallus gallus OX=9031 GN=LOC100859276 PE=4 SV=2;tr|A0A1D5P2P2|A0A1D5P2P2_CHICK Uncharacterized protein OS=Gallus gallus OX=9031 PE=4 SV=2	20.7772	25.3504	8	40.873	0	165.93	891510000
A0A1D5NXD4;A0A1D5P7I9;A0A1D5PX80;A0A1L1RKP9	tr|A0A1D5NXD4|A0A1D5NXD4_CHICK CBFD_NFYB_HMF domain-containing protein OS=Gallus gallus OX=9031 GN=NFYC PE=4 SV=1;tr|A0A1D5P7I9|A0A1D5P7I9_CHICK CBFD_NFYB_HMF domain-containing protein OS=Gallus gallus OX=9031 GN=NFYC PE=4 SV=1;tr|A0A1D5PX80|A0A1D5PX80_CHI	NaN	22.1827	2	36.489	0	12.116	33324000
F1NNV7;A0A1D5NXD7	tr|F1NNV7|F1NNV7_CHICK MICOS complex subunit OS=Gallus gallus OX=9031 GN=APOO PE=3 SV=4;tr|A0A1D5NXD7|A0A1D5NXD7_CHICK MICOS complex subunit OS=Gallus gallus OX=9031 GN=APOO PE=3 SV=1	NaN	24.2039	4	23.914	0	128.3	193240000
A0A1D5NXE4	tr|A0A1D5NXE4|A0A1D5NXE4_CHICK N-acetyltransferase domain-containing protein OS=Gallus gallus OX=9031 GN=LOC107049486 PE=4 SV=2	NaN	22.7189	2	19.004	0	15.622	55229000
A0A3Q3B1H6;A0A1D5PY18;A0A1D5NXG4;Q5ZMT6	tr|A0A3Q3B1H6|A0A3Q3B1H6_CHICK t-SNARE coiled-coil homology domain-containing protein OS=Gallus gallus OX=9031 GN=STX2 PE=3 SV=1;tr|A0A1D5PY18|A0A1D5PY18_CHICK t-SNARE coiled-coil homology domain-containing protein OS=Gallus gallus OX=9031 GN=STX2 PE=3 SV=	NaN	22.7534	4	29.982	0	35.005	84848000
F1NI43;A0A1D5NXI2;Q5ZKR7	tr|F1NI43|F1NI43_CHICK Long-chain-fatty-acid--CoA ligase ACSBG2 OS=Gallus gallus OX=9031 GN=ACSBG2 PE=4 SV=3;tr|A0A1D5NXI2|A0A1D5NXI2_CHICK Long-chain-fatty-acid--CoA ligase ACSBG2 OS=Gallus gallus OX=9031 GN=ACSBG2 PE=4 SV=3;sp|Q5ZKR7|ACBG2_CHICK Long-cha	NaN	19.1532	2	80.987	0	11.073	18657000
P46936;A0A1D5NXI5;A0A3Q3AMD7;A0A1D5PM63	sp|P46936|YAP1_CHICK Transcriptional coactivator YAP1 OS=Gallus gallus OX=9031 GN=YAP1 PE=1 SV=1;tr|A0A1D5NXI5|A0A1D5NXI5_CHICK Transcriptional coactivator YAP1 OS=Gallus gallus OX=9031 GN=YAP1 PE=4 SV=2;tr|A0A3Q3AMD7|A0A3Q3AMD7_CHICK Transcriptional coact	NaN	22.9567	2	47.822	0	13.861	122110000
A0A1D5P6B8;A0A1D5P6J4;A0A1L1RV59;A0A1D5NXJ7	tr|A0A1D5P6B8|A0A1D5P6B8_CHICK Uncharacterized protein OS=Gallus gallus OX=9031 GN=CADM1 PE=3 SV=2;tr|A0A1D5P6J4|A0A1D5P6J4_CHICK Uncharacterized protein OS=Gallus gallus OX=9031 GN=CADM1 PE=3 SV=2;tr|A0A1L1RV59|A0A1L1RV59_CHICK Uncharacterized protein OS=	NaN	23.4446	3	45.001	0	97.643	239740000
A0A1D5NXK6	tr|A0A1D5NXK6|A0A1D5NXK6_CHICK Uncharacterized protein OS=Gallus gallus OX=9031 GN=DDI2 PE=3 SV=2	NaN	19.6547	2	111.16	0	34.846	36317000
A0A1D5PGA6;A0A1D5NXK7	tr|A0A1D5PGA6|A0A1D5PGA6_CHICK Prefoldin subunit 5 OS=Gallus gallus OX=9031 GN=PFDN5 PE=4 SV=1;tr|A0A1D5NXK7|A0A1D5NXK7_CHICK Uncharacterized protein OS=Gallus gallus OX=9031 GN=PFDN5 PE=3 SV=1	NaN	23.7648	1	16.306	0	62.808	85520000
A0A1D5PPE9;E1BZ39;A0A1D5NXL0	tr|A0A1D5PPE9|A0A1D5PPE9_CHICK Neuropilin OS=Gallus gallus OX=9031 GN=NRP2 PE=3 SV=2;tr|E1BZ39|E1BZ39_CHICK Neuropilin OS=Gallus gallus OX=9031 GN=NRP2 PE=3 SV=4;tr|A0A1D5NXL0|A0A1D5NXL0_CHICK Uncharacterized protein OS=Gallus gallus OX=9031 GN=NRP2 PE=3 S	NaN	19.1065	2	101.18	0.00047962	10.696	25401000
A0A3Q2UBU6;A0A1D5NXL1	tr|A0A3Q2UBU6|A0A3Q2UBU6_CHICK Uncharacterized protein OS=Gallus gallus OX=9031 GN=TBL1XR1 PE=4 SV=1;tr|A0A1D5NXL1|A0A1D5NXL1_CHICK Uncharacterized protein OS=Gallus gallus OX=9031 GN=TBL1XR1 PE=4 SV=1	NaN	20.7247	2	51.499	0	37.387	34655000
A0A1D5NXL7;A0A1D5P9K2	tr|A0A1D5NXL7|A0A1D5NXL7_CHICK PCI domain-containing protein OS=Gallus gallus OX=9031 GN=PSMD3 PE=3 SV=1;tr|A0A1D5P9K2|A0A1D5P9K2_CHICK PCI domain-containing protein OS=Gallus gallus OX=9031 GN=PSMD3 PE=3 SV=1	NaN	24.5563	12	59.352	0	184.52	764760000
A0A1D5NXM7;A0A1L1RME9	tr|A0A1D5NXM7|A0A1D5NXM7_CHICK MPN domain-containing protein OS=Gallus gallus OX=9031 GN=NPLOC4 PE=3 SV=1;tr|A0A1L1RME9|A0A1L1RME9_CHICK Uncharacterized protein OS=Gallus gallus OX=9031 GN=NPLOC4 PE=3 SV=2	NaN	20.9518	3	66.892	0	20.197	66931000
A0A1D5PHD7;A0A3Q2ULY1;A0A1D5NXM9;A0A3Q2UPZ2;A0A1D5PB73;A0A1D5P7L1	tr|A0A1D5PHD7|A0A1D5PHD7_CHICK Uncharacterized protein OS=Gallus gallus OX=9031 GN=CASK PE=3 SV=2;tr|A0A3Q2ULY1|A0A3Q2ULY1_CHICK Uncharacterized protein OS=Gallus gallus OX=9031 GN=CASK PE=3 SV=1;tr|A0A1D5NXM9|A0A1D5NXM9_CHICK Uncharacterized protein OS=Ga	NaN	18.1711	1	100.82	0.0023594	6.2327	13282000
A0A1D5NXQ0;A0A1D5PFT3;A0A1D5PBZ2	tr|A0A1D5NXQ0|A0A1D5NXQ0_CHICK KH domain-containing protein OS=Gallus gallus OX=9031 GN=KHDRBS3 PE=3 SV=2;tr|A0A1D5PFT3|A0A1D5PFT3_CHICK KH domain-containing protein OS=Gallus gallus OX=9031 GN=KHDRBS3 PE=3 SV=2;tr|A0A1D5PBZ2|A0A1D5PBZ2_CHICK KH domain-con	NaN	21.1696	2	42.614	0	15.742	33022000
Q5ZI93;A0A1D5NXQ7;A0A1L1S003;A0A1D5PV84;A0A1L1RMB6;A0A1D5PFP7;A0A1L1RQD7	tr|Q5ZI93|Q5ZI93_CHICK Uncharacterized protein OS=Gallus gallus OX=9031 GN=TPD52L2 PE=2 SV=1;tr|A0A1D5NXQ7|A0A1D5NXQ7_CHICK Uncharacterized protein OS=Gallus gallus OX=9031 GN=TPD52L2 PE=3 SV=2;tr|A0A1L1S003|A0A1L1S003_CHICK Uncharacterized protein OS=Gall	NaN	24.8975	6	22.181	0	122.51	375030000
A0A1D5NXR2	tr|A0A1D5NXR2|A0A1D5NXR2_CHICK Endoplasmic reticulum transmembrane protein OS=Gallus gallus OX=9031 GN=BCAP31 PE=3 SV=1	NaN	23.6037	2	27.228	0	54.63	165720000
A0A1D5NXS9;A0A1D5PIX0	tr|A0A1D5NXS9|A0A1D5NXS9_CHICK Alpha-actinin-4 OS=Gallus gallus OX=9031 GN=ACTN4 PE=3 SV=2;tr|A0A1D5PIX0|A0A1D5PIX0_CHICK Alpha-actinin-4 OS=Gallus gallus OX=9031 GN=ACTN4 PE=4 SV=2	NaN	18.9429	1	117.28	0	28.128	30238000
A0A1D5NXV3	tr|A0A1D5NXV3|A0A1D5NXV3_CHICK Aspartate beta-hydroxylase OS=Gallus gallus OX=9031 PE=3 SV=2	NaN	20.7284	3	33.792	0	29.748	34746000
A0A1D5NXV6;F1NNQ1	tr|A0A1D5NXV6|A0A1D5NXV6_CHICK Spermatogenesis-defective protein 39 homolog OS=Gallus gallus OX=9031 GN=VIPAS39 PE=4 SV=2;tr|F1NNQ1|F1NNQ1_CHICK Spermatogenesis-defective protein 39 homolog OS=Gallus gallus OX=9031 GN=VIPAS39 PE=4 SV=5	NaN	17.744	1	56.802	0.00046795	9.3265	6366000
Q5F3L4;A0A1D5NY14	sp|Q5F3L4|DEN6A_CHICK Protein DENND6A OS=Gallus gallus OX=9031 GN=DENND6A PE=2 SV=1;tr|A0A1D5NY14|A0A1D5NY14_CHICK Protein DENND6A OS=Gallus gallus OX=9031 GN=DENND6A PE=3 SV=2	NaN	16.7897	1	67.05	0.001227	6.6678	3059000
A0A1D5NY37;Q5F352;A0A1D5PT95	tr|A0A1D5NY37|A0A1D5NY37_CHICK Uncharacterized protein OS=Gallus gallus OX=9031 GN=KRAS PE=4 SV=1;sp|Q5F352|RASN_CHICK GTPase NRas OS=Gallus gallus OX=9031 GN=NRAS PE=2 SV=1;tr|A0A1D5PT95|A0A1D5PT95_CHICK Uncharacterized protein OS=Gallus gallus OX=9031 GN	NaN	23.0051	1	21.452	0	15.444	75768000
A0A1D5NY47;A0A1D5P3M8;A0A3Q2UAD0	tr|A0A1D5NY47|A0A1D5NY47_CHICK BAT2_N domain-containing protein OS=Gallus gallus OX=9031 GN=PRRC2B PE=4 SV=2;tr|A0A1D5P3M8|A0A1D5P3M8_CHICK BAT2_N domain-containing protein OS=Gallus gallus OX=9031 GN=PRRC2B PE=4 SV=1;tr|A0A3Q2UAD0|A0A3Q2UAD0_CHICK BAT2_N	NaN	15.8707	1	238.93	0.0016207	6.5196	6291300
A0A1D5PT44;A0A1D5NY57	tr|A0A1D5PT44|A0A1D5PT44_CHICK PHD-type domain-containing protein OS=Gallus gallus OX=9031 GN=PYGO2 PE=4 SV=2;tr|A0A1D5NY57|A0A1D5NY57_CHICK PHD-type domain-containing protein OS=Gallus gallus OX=9031 GN=PYGO2 PE=4 SV=2	22.4464	17.0191	2	64.356	0	26.708	146200000
A0A1D5NY89	tr|A0A1D5NY89|A0A1D5NY89_CHICK UBX domain-containing protein OS=Gallus gallus OX=9031 GN=FAF1 PE=4 SV=2	NaN	19.5791	2	73.822	0	12.298	20365000
A0A1D5NYA0;A0A1L1RVH4	tr|A0A1D5NYA0|A0A1D5NYA0_CHICK NIPSNAP domain-containing protein OS=Gallus gallus OX=9031 GN=NIPSNAP1 PE=3 SV=2;tr|A0A1L1RVH4|A0A1L1RVH4_CHICK PH domain-containing protein OS=Gallus gallus OX=9031 GN=NIPSNAP1 PE=3 SV=2	NaN	18.2316	1	32.584	0.0057274	5.9791	4309200
E1BZ86;F1P1J7;F1P011;A0A1D5PNB0;Q5ZKI0;F1NGS8;A0A1D5NZG7;A0A3Q2UPU8;A0A3Q2U2C3;A0A3Q2UMD3;A0A1D5NZU2;A0A1D5NYA6;A0A3Q2UFJ3;A0A1D5PXX2;A0A1D5PDX2;A0A3Q2TYU0	tr|E1BZ86|E1BZ86_CHICK Calcium/calmodulin-dependent protein kinase OS=Gallus gallus OX=9031 GN=CAMK2G PE=3 SV=4;tr|F1P1J7|F1P1J7_CHICK Calcium/calmodulin-dependent protein kinase OS=Gallus gallus OX=9031 GN=CAMK2G PE=3 SV=3;tr|F1P011|F1P011_CHICK Calcium/c	NaN	18.7129	2	51.549	0	19.845	8593600
A0A1D5NYA8	tr|A0A1D5NYA8|A0A1D5NYA8_CHICK Uncharacterized protein OS=Gallus gallus OX=9031 GN=DNAJA4 PE=3 SV=2	NaN	21.711	2	44.802	0	12.36	78958000
A0A1D5NYB2	tr|A0A1D5NYB2|A0A1D5NYB2_CHICK Polyadenylate-binding protein OS=Gallus gallus OX=9031 GN=PABPC1 PE=3 SV=2	21.6022	27.6364	26	70.871	0	323.31	7625100000
A0A1D5NYD8	tr|A0A1D5NYD8|A0A1D5NYD8_CHICK Vesicle-fusing ATPase OS=Gallus gallus OX=9031 GN=VPS4A PE=3 SV=2	NaN	21.1667	2	49.042	0	17.683	61208000
A0A1D5PQN0;A0A1D5NYE8	tr|A0A1D5PQN0|A0A1D5PQN0_CHICK Uncharacterized protein OS=Gallus gallus OX=9031 GN=CTNNB1 PE=3 SV=1;tr|A0A1D5NYE8|A0A1D5NYE8_CHICK Uncharacterized protein OS=Gallus gallus OX=9031 GN=CTNNB1 PE=3 SV=1	NaN	23.7345	10	78.529	0	199.57	586210000
A0A1D5NYF8;E1BVC4;A0A1L1RNL7	tr|A0A1D5NYF8|A0A1D5NYF8_CHICK GATOR complex protein SEC13 OS=Gallus gallus OX=9031 GN=SEC13 PE=3 SV=2;tr|E1BVC4|E1BVC4_CHICK GATOR complex protein SEC13 OS=Gallus gallus OX=9031 GN=SEC13 PE=3 SV=2;tr|A0A1L1RNL7|A0A1L1RNL7_CHICK GATOR complex protein SEC13	NaN	22.4477	3	35.18	0	44.782	74363000
A0A1D5NYI5	tr|A0A1D5NYI5|A0A1D5NYI5_CHICK CULLIN_2 domain-containing protein OS=Gallus gallus OX=9031 GN=CUL5 PE=3 SV=2	NaN	18.9132	1	77.078	0.0008285	6.8122	18760000
A0A1D5NYJ2	tr|A0A1D5NYJ2|A0A1D5NYJ2_CHICK Lon protease homolog, mitochondrial OS=Gallus gallus OX=9031 GN=LONP1 PE=3 SV=1	NaN	23.8588	13	103.65	0	117.41	578080000
A0A1D5NYK3;A0A3Q3AW56;A0A3Q2U8T5	tr|A0A1D5NYK3|A0A1D5NYK3_CHICK Glutaryl-CoA dehydrogenase OS=Gallus gallus OX=9031 GN=GCDH PE=3 SV=2;tr|A0A3Q3AW56|A0A3Q3AW56_CHICK Uncharacterized protein OS=Gallus gallus OX=9031 GN=GCDH PE=3 SV=1;tr|A0A3Q2U8T5|A0A3Q2U8T5_CHICK Uncharacterized protein OS	NaN	23.8429	5	46.758	0	32.78	285880000
A0A1D5NYK7	tr|A0A1D5NYK7|A0A1D5NYK7_CHICK Moesin OS=Gallus gallus OX=9031 PE=4 SV=1	NaN	25.508	6	68.37	0	137.52	1527000000
A0A1D5NYM1;Q5ZHU4;A0A1D5P4S8	tr|A0A1D5NYM1|A0A1D5NYM1_CHICK ATP-dependent 6-phosphofructokinase OS=Gallus gallus OX=9031 GN=PFKP PE=3 SV=1;tr|Q5ZHU4|Q5ZHU4_CHICK Uncharacterized protein OS=Gallus gallus OX=9031 GN=PFKP PE=2 SV=1;tr|A0A1D5P4S8|A0A1D5P4S8_CHICK 6-phosphofructokinase OS=	NaN	23.3023	11	86.214	0	106.01	320680000
P50460;A0A1D5NYM7	sp|P50460|CSRP2_CHICK Cysteine and glycine-rich protein 2 OS=Gallus gallus OX=9031 GN=CSRP2 PE=2 SV=3;tr|A0A1D5NYM7|A0A1D5NYM7_CHICK Cysteine and glycine-rich protein 2 OS=Gallus gallus OX=9031 GN=CSRP2 PE=4 SV=1	NaN	25.1072	3	20.925	0	66.505	397560000
A0A1D5NYP8	tr|A0A1D5NYP8|A0A1D5NYP8_CHICK SHC-transforming protein 1 OS=Gallus gallus OX=9031 GN=SHC1 PE=4 SV=1	NaN	20.4984	3	67.555	0	16.96	41477000
A0A1D5NYR0	tr|A0A1D5NYR0|A0A1D5NYR0_CHICK N-acetyltransferase domain-containing protein OS=Gallus gallus OX=9031 GN=NAA50 PE=4 SV=1	NaN	22.8882	1	17.815	0.0023772	6.2929	77630000
A0A1D5NYR1	tr|A0A1D5NYR1|A0A1D5NYR1_CHICK HTH La-type RNA-binding domain-containing protein OS=Gallus gallus OX=9031 GN=LARP4 PE=4 SV=2	NaN	22.0802	3	81.415	0	26.848	115290000
A0A1L1RR29;A0A1D5P6Y8;A0A1D5NYU5	tr|A0A1L1RR29|A0A1L1RR29_CHICK RRM domain-containing protein OS=Gallus gallus OX=9031 GN=SLIRP PE=4 SV=2;tr|A0A1D5P6Y8|A0A1D5P6Y8_CHICK RRM domain-containing protein OS=Gallus gallus OX=9031 GN=SLIRP PE=4 SV=2;tr|A0A1D5NYU5|A0A1D5NYU5_CHICK RRM domain-cont	NaN	24.2399	3	10.877	0	35.083	118880000
A0A1D5NYV3;E1BXX6	tr|A0A1D5NYV3|A0A1D5NYV3_CHICK Uncharacterized protein OS=Gallus gallus OX=9031 GN=DIS3 PE=3 SV=1;tr|E1BXX6|E1BXX6_CHICK Uncharacterized protein OS=Gallus gallus OX=9031 GN=DIS3 PE=3 SV=2	NaN	19.4923	2	101.32	0	14.423	36139000
P51971;R4GLE6;A0A1D5P2D3;A0A1D5NYX1	sp|P51971|EIF1_CHICK Eukaryotic translation initiation factor 1 (Fragment) OS=Gallus gallus OX=9031 GN=EIF1 PE=3 SV=1;tr|R4GLE6|R4GLE6_CHICK Eukaryotic translation initiation factor 1 OS=Gallus gallus OX=9031 GN=EIF1 PE=3 SV=2;tr|A0A1D5P2D3|A0A1D5P2D3_CHIC	NaN	23.9827	1	9.0043	0.00043745	7.5236	49730000
A0A1D5NYX6;P00174	tr|A0A1D5NYX6|A0A1D5NYX6_CHICK Cytochrome b5 OS=Gallus gallus OX=9031 GN=CYB5A PE=3 SV=2;sp|P00174|CYB5_CHICK Cytochrome b5 OS=Gallus gallus OX=9031 GN=CYB5A PE=1 SV=4	NaN	25.1715	2	14.396	0	14.407	151160000
A0A1D5NYX8;A0A1L1RV27;A0A1L1RP85;A0A1L1RPZ6;Q5ZK92	tr|A0A1D5NYX8|A0A1D5NYX8_CHICK Spastin OS=Gallus gallus OX=9031 GN=SPAST PE=3 SV=2;tr|A0A1L1RV27|A0A1L1RV27_CHICK Spastin OS=Gallus gallus OX=9031 GN=SPAST PE=3 SV=2;tr|A0A1L1RP85|A0A1L1RP85_CHICK Spastin OS=Gallus gallus OX=9031 GN=SPAST PE=3 SV=2;tr|A0A1	NaN	18.8844	2	59.292	0	11.73	17421000
A0A3Q2U340;E1BVC3;A0A3Q2U411;A0A1D5NYY2;A0A1D5P7I0	tr|A0A3Q2U340|A0A3Q2U340_CHICK Uncharacterized protein OS=Gallus gallus OX=9031 GN=CLASP1 PE=4 SV=1;tr|E1BVC3|E1BVC3_CHICK Uncharacterized protein OS=Gallus gallus OX=9031 GN=CLASP1 PE=4 SV=4;tr|A0A3Q2U411|A0A3Q2U411_CHICK Uncharacterized protein OS=Gallus	NaN	18.6733	3	161.5	0	19.523	35951000
A0A1D5NYY8	tr|A0A1D5NYY8|A0A1D5NYY8_CHICK Uncharacterized protein OS=Gallus gallus OX=9031 GN=DPP7 PE=3 SV=2	NaN	22.4902	3	62.122	0	24.662	129610000
A0A1D5NZ00	tr|A0A1D5NZ00|A0A1D5NZ00_CHICK Uncharacterized protein OS=Gallus gallus OX=9031 GN=SCFD2 PE=3 SV=2	NaN	18.6337	1	69.805	0	11.307	13422000
A0A1D5NZ06;A0A3Q2TV39	tr|A0A1D5NZ06|A0A1D5NZ06_CHICK 40S ribosomal protein S27 OS=Gallus gallus OX=9031 GN=RPS27 PE=3 SV=1;tr|A0A3Q2TV39|A0A3Q2TV39_CHICK 40S ribosomal protein S27 OS=Gallus gallus OX=9031 GN=RPS27L PE=3 SV=1	NaN	25.6715	2	9.461	0	20.988	213770000
A0A1D5PBJ2;A0A1D5NZ08;A0A1D5PCN9	tr|A0A1D5PBJ2|A0A1D5PBJ2_CHICK Uridine-cytidine kinase OS=Gallus gallus OX=9031 GN=LOC776992 PE=3 SV=3;tr|A0A1D5NZ08|A0A1D5NZ08_CHICK Uridine-cytidine kinase OS=Gallus gallus OX=9031 GN=LOC776992 PE=3 SV=3;tr|A0A1D5PCN9|A0A1D5PCN9_CHICK Uridine-cytidine ki	NaN	18.5052	1	57.773	0.00083682	6.9332	10418000
A0A1D5NZ09;A0A3Q2UP90	tr|A0A1D5NZ09|A0A1D5NZ09_CHICK Polyribonucleotide nucleotidyltransferase OS=Gallus gallus OX=9031 GN=PNPT1 PE=3 SV=2;tr|A0A3Q2UP90|A0A3Q2UP90_CHICK Polyribonucleotide nucleotidyltransferase OS=Gallus gallus OX=9031 GN=PNPT1 PE=3 SV=1	NaN	23.6891	13	86.953	0	174.97	513960000
A0A1D5NZ30;P15771	tr|A0A1D5NZ30|A0A1D5NZ30_CHICK Nucleolin OS=Gallus gallus OX=9031 GN=NCL PE=4 SV=1;sp|P15771|NUCL_CHICK Nucleolin OS=Gallus gallus OX=9031 GN=NCL PE=1 SV=1	NaN	27.1524	28	75.399	0	323.31	4624400000
A0A1L1RTK6;A0A1D5NZ54	tr|A0A1L1RTK6|A0A1L1RTK6_CHICK Hydroxymethylbilane synthase OS=Gallus gallus OX=9031 GN=HMBS PE=3 SV=2;tr|A0A1D5NZ54|A0A1D5NZ54_CHICK Hydroxymethylbilane synthase OS=Gallus gallus OX=9031 GN=HMBS PE=3 SV=1	NaN	20.6396	2	37.109	0	12.371	31039000
A0A1D5NZ92	tr|A0A1D5NZ92|A0A1D5NZ92_CHICK Uncharacterized protein OS=Gallus gallus OX=9031 GN=CBX5 PE=4 SV=1	NaN	21.4784	1	21.727	0.0060629	5.9254	29217000
E1C8L8;A0A1D5NZ97	tr|E1C8L8|E1C8L8_CHICK G-patch domain-containing protein OS=Gallus gallus OX=9031 GN=GPATCH11 PE=4 SV=2;tr|A0A1D5NZ97|A0A1D5NZ97_CHICK Coiled-coil domain-containing protein 75 OS=Gallus gallus OX=9031 GN=GPATCH11 PE=3 SV=1	NaN	19.7716	1	24.071	0.00043103	7.3209	8950400
E1C7F8;A0A1D5NZA1	tr|E1C7F8|E1C7F8_CHICK Rae1 protein homolog OS=Gallus gallus OX=9031 GN=RAE1 PE=3 SV=4;tr|A0A1D5NZA1|A0A1D5NZA1_CHICK Rae1 protein homolog OS=Gallus gallus OX=9031 GN=RAE1 PE=3 SV=1	NaN	19.3558	1	47.398	0	19.523	10735000
Q5ZHL5;A0A1D5NZB9	tr|Q5ZHL5|Q5ZHL5_CHICK NFU1 iron-sulfur cluster scaffold homolog, mitochondrial OS=Gallus gallus OX=9031 GN=NFU1 PE=2 SV=1;tr|A0A1D5NZB9|A0A1D5NZB9_CHICK NFU1 iron-sulfur cluster scaffold homolog, mitochondrial OS=Gallus gallus OX=9031 GN=NFU1 PE=3 SV=1	NaN	23.1538	4	26.017	0	36.439	111990000
Q5ZLS2;A0A1D5NZF2	sp|Q5ZLS2|EDC3_CHICK Enhancer of mRNA-decapping protein 3 OS=Gallus gallus OX=9031 GN=EDC3 PE=2 SV=1;tr|A0A1D5NZF2|A0A1D5NZF2_CHICK Enhancer of mRNA-decapping protein 3 OS=Gallus gallus OX=9031 GN=EDC3 PE=3 SV=1	NaN	21.2683	2	56.036	0	15.678	78300000
A0A1D5NZG5	tr|A0A1D5NZG5|A0A1D5NZG5_CHICK TRMT1-like protein OS=Gallus gallus OX=9031 GN=TRMT1L PE=3 SV=2	NaN	20.2478	2	85.366	0	41.536	56030000
A0A1D5NZM5	tr|A0A1D5NZM5|A0A1D5NZM5_CHICK Uncharacterized protein OS=Gallus gallus OX=9031 GN=RCC2 PE=4 SV=1	NaN	22.9042	8	56.649	0	71.905	235490000
A0A1D5PXH0;A0A1D5NZQ6;A0A1D5P8N3	tr|A0A1D5PXH0|A0A1D5PXH0_CHICK AP complex subunit beta OS=Gallus gallus OX=9031 GN=AP1B1 PE=3 SV=2;tr|A0A1D5NZQ6|A0A1D5NZQ6_CHICK Uncharacterized protein OS=Gallus gallus OX=9031 GN=AP1B1 PE=3 SV=2;tr|A0A1D5P8N3|A0A1D5P8N3_CHICK Uncharacterized protein OS=	NaN	22.2526	2	104.8	0	15.108	219870000
A0A1D5NZQ7;F1NN41	tr|A0A1D5NZQ7|A0A1D5NZQ7_CHICK Peroxidase OS=Gallus gallus OX=9031 GN=PXDN PE=4 SV=2;tr|F1NN41|F1NN41_CHICK Peroxidase OS=Gallus gallus OX=9031 GN=PXDN PE=4 SV=4	NaN	16.8898	1	177.5	0.0008244	6.7404	9714200
A0A1L1RKI2;A0A1D5NZU0	tr|A0A1L1RKI2|A0A1L1RKI2_CHICK Uncharacterized protein OS=Gallus gallus OX=9031 GN=SEH1L PE=3 SV=2;tr|A0A1D5NZU0|A0A1D5NZU0_CHICK Uncharacterized protein OS=Gallus gallus OX=9031 GN=SEH1L PE=3 SV=1	NaN	22.5961	3	39.784	0	34.601	133150000
A0A1D5NZU4	tr|A0A1D5NZU4|A0A1D5NZU4_CHICK Protein kinase domain-containing protein OS=Gallus gallus OX=9031 GN=CDC2L1 PE=4 SV=2	NaN	19.5534	2	89.925	0	24.246	29238000
A0A1D5NZV1;A0A3Q2TYN9;A0A3Q2U699	tr|A0A1D5NZV1|A0A1D5NZV1_CHICK Uncharacterized protein OS=Gallus gallus OX=9031 GN=MAPRE3 PE=3 SV=2;tr|A0A3Q2TYN9|A0A3Q2TYN9_CHICK Uncharacterized protein OS=Gallus gallus OX=9031 GN=MAPRE3 PE=3 SV=1;tr|A0A3Q2U699|A0A3Q2U699_CHICK Uncharacterized protein O	NaN	20.0158	2	31.833	0	16.363	15902000
A0A1D5NZY6;Q5ZMK9	tr|A0A1D5NZY6|A0A1D5NZY6_CHICK Adenosine kinase OS=Gallus gallus OX=9031 GN=ADK PE=3 SV=1;tr|Q5ZMK9|Q5ZMK9_CHICK Adenosine kinase OS=Gallus gallus OX=9031 GN=ADK PE=2 SV=1	NaN	21.877	2	38.561	0	12.754	65477000
F1NRD6;A0A1D5P047;A0A3Q3AWA9;A0A3Q2U7S7;A0A3Q2UNM8	tr|F1NRD6|F1NRD6_CHICK Uncharacterized protein OS=Gallus gallus OX=9031 GN=PTBP2 PE=4 SV=3;tr|A0A1D5P047|A0A1D5P047_CHICK Uncharacterized protein OS=Gallus gallus OX=9031 GN=PTBP2 PE=4 SV=1;tr|A0A3Q3AWA9|A0A3Q3AWA9_CHICK Uncharacterized protein OS=Gallus g	NaN	18.8513	1	52.577	0	11.289	8039900
A0A1L1RSJ4;A0A1D5P079;F1NXB0	tr|A0A1L1RSJ4|A0A1L1RSJ4_CHICK Procollagen-lysine 5-dioxygenase OS=Gallus gallus OX=9031 GN=PLOD2 PE=4 SV=2;tr|A0A1D5P079|A0A1D5P079_CHICK Procollagen-lysine 5-dioxygenase OS=Gallus gallus OX=9031 GN=PLOD2 PE=4 SV=1;tr|F1NXB0|F1NXB0_CHICK Procollagen-lysin	NaN	22.8937	10	87.01	0	131.79	335090000
A0A1D5P097	tr|A0A1D5P097|A0A1D5P097_CHICK Uncharacterized protein OS=Gallus gallus OX=9031 GN=ACOT7 PE=4 SV=2	NaN	20.4147	1	43.134	0.00043917	7.5682	26558000
A0A1L1RP39;A0A1D5P0A1	tr|A0A1L1RP39|A0A1L1RP39_CHICK UTP--glucose-1-phosphate uridylyltransferase OS=Gallus gallus OX=9031 GN=UGP2 PE=3 SV=1;tr|A0A1D5P0A1|A0A1D5P0A1_CHICK UTP--glucose-1-phosphate uridylyltransferase OS=Gallus gallus OX=9031 GN=UGP2 PE=3 SV=1	NaN	24.4695	9	55.633	0	57.601	627230000
A0A1D5P0B9	tr|A0A1D5P0B9|A0A1D5P0B9_CHICK Uncharacterized protein OS=Gallus gallus OX=9031 GN=EXOSC7 PE=4 SV=1	NaN	22.4662	2	31.645	0	24.562	98505000
A0A1D5P0D2	tr|A0A1D5P0D2|A0A1D5P0D2_CHICK Uncharacterized protein OS=Gallus gallus OX=9031 GN=C33H12orf10 PE=3 SV=2	NaN	21.5531	2	52.351	0	16.011	76924000
A0A1D5P0D3;F1NLE7	tr|A0A1D5P0D3|A0A1D5P0D3_CHICK Aminoacyl tRNA synthetase complex interacting multifunctional protein 1 OS=Gallus gallus OX=9031 GN=AIMP1 PE=4 SV=1;tr|F1NLE7|F1NLE7_CHICK tRNA-binding domain-containing protein OS=Gallus gallus OX=9031 GN=AIMP1 PE=4 SV=3	NaN	23.836	7	33.866	0	73.404	269530000
A0A1D5P0E2	tr|A0A1D5P0E2|A0A1D5P0E2_CHICK Protein transport protein SEC23 OS=Gallus gallus OX=9031 GN=SEC23A PE=3 SV=1	NaN	21.2807	3	86.186	0	24.518	91711000
P98157;A0A1D5P0G1;A0A1D5PUA3	sp|P98157|LRP1_CHICK Low-density lipoprotein receptor-related protein 1 OS=Gallus gallus OX=9031 GN=LRP1 PE=2 SV=1;tr|A0A1D5P0G1|A0A1D5P0G1_CHICK Low-density lipoprotein receptor-related protein 1 OS=Gallus gallus OX=9031 GN=LRP1 PE=3 SV=2;tr|A0A1D5PUA3|A0	NaN	15.8505	1	507.13	0	12.23	13353000
Q90830;A0A1D5P0K3;A0A1D5P2L6	sp|Q90830|CRTAP_CHICK Cartilage-associated protein OS=Gallus gallus OX=9031 GN=CRTAP PE=1 SV=1;tr|A0A1D5P0K3|A0A1D5P0K3_CHICK Cartilage-associated protein OS=Gallus gallus OX=9031 GN=CRTAP PE=4 SV=2;tr|A0A1D5P2L6|A0A1D5P2L6_CHICK Cartilage-associated prote	NaN	19.6468	2	31.493	0	11.837	13955000
A0A1D5P0R4	tr|A0A1D5P0R4|A0A1D5P0R4_CHICK Mitochondrial 18 kDa protein OS=Gallus gallus OX=9031 GN=MTFP1 PE=3 SV=2	NaN	20.9644	1	17.302	0	33.505	18415000
A0A1D5P0T2;F1NSQ4;Q5ZM73	tr|A0A1D5P0T2|A0A1D5P0T2_CHICK Mitochondrial Rho GTPase OS=Gallus gallus OX=9031 GN=RHOT1 PE=3 SV=2;tr|F1NSQ4|F1NSQ4_CHICK Mitochondrial Rho GTPase OS=Gallus gallus OX=9031 GN=RHOT1 PE=3 SV=1;sp|Q5ZM73|MIRO1_CHICK Mitochondrial Rho GTPase 1 OS=Gallus gallu	NaN	17.1851	1	68.559	0.00085179	7.175	4321500
A0A1D5P0T5;A0A1D5PGK7;A0A1D5P6I0	tr|A0A1D5P0T5|A0A1D5P0T5_CHICK DNA primase OS=Gallus gallus OX=9031 GN=PRIM1 PE=3 SV=1;tr|A0A1D5PGK7|A0A1D5PGK7_CHICK DNA primase OS=Gallus gallus OX=9031 GN=PRIM1 PE=3 SV=1;tr|A0A1D5P6I0|A0A1D5P6I0_CHICK DNA primase OS=Gallus gallus OX=9031 GN=PRIM1 PE=3	NaN	19.458	2	49.657	0	11.074	20165000
A0A1D5P0U5	tr|A0A1D5P0U5|A0A1D5P0U5_CHICK Calreticulin OS=Gallus gallus OX=9031 GN=CALR PE=3 SV=3	NaN	27.4936	13	48.106	0	199.6	4346400000
E1C6C0;A0A1D5P0V5	tr|E1C6C0|E1C6C0_CHICK Mediator of ErbB2-driven cell motility 1 OS=Gallus gallus OX=9031 GN=MEMO1 PE=3 SV=4;tr|A0A1D5P0V5|A0A1D5P0V5_CHICK Mediator of ErbB2-driven cell motility 1 OS=Gallus gallus OX=9031 GN=MEMO1 PE=3 SV=2	NaN	21.0566	2	31.81	0	24.147	37077000
F1NK46;A0A1D5P0V7;A0A1L1RXE7	tr|F1NK46|F1NK46_CHICK Uncharacterized protein OS=Gallus gallus OX=9031 GN=SPOUT1 PE=3 SV=2;tr|A0A1D5P0V7|A0A1D5P0V7_CHICK Uncharacterized protein OS=Gallus gallus OX=9031 GN=SPOUT1 PE=3 SV=2;tr|A0A1L1RXE7|A0A1L1RXE7_CHICK Uncharacterized protein OS=Gallus	NaN	19.3544	1	42.693	0.00043879	7.5591	14076000
F1P1X0;A0A1D5P0V9;A0A3Q2TXY5	tr|F1P1X0|F1P1X0_CHICK HTH La-type RNA-binding domain-containing protein OS=Gallus gallus OX=9031 GN=LARP4B PE=4 SV=2;tr|A0A1D5P0V9|A0A1D5P0V9_CHICK HTH La-type RNA-binding domain-containing protein OS=Gallus gallus OX=9031 GN=LARP4B PE=4 SV=1;tr|A0A3Q2TXY	NaN	18.1896	1	81.219	0.0031056	6.1146	10464000
A0A1D5P0Y1	tr|A0A1D5P0Y1|A0A1D5P0Y1_CHICK O-GlcNAc transferase subunit p110 OS=Gallus gallus OX=9031 GN=OGT PE=3 SV=2	NaN	20.3949	5	115.51	0	42.131	70314000
A0A1D5P5N9;A0A1D5P102;A0A3Q2TXA3;E1BT38;A0A1D5PT29;A0A3Q2U359;A0A1D5P1S9	tr|A0A1D5P5N9|A0A1D5P5N9_CHICK Uncharacterized protein OS=Gallus gallus OX=9031 GN=DLG1 PE=4 SV=2;tr|A0A1D5P102|A0A1D5P102_CHICK Uncharacterized protein OS=Gallus gallus OX=9031 GN=DLG1 PE=3 SV=1;tr|A0A3Q2TXA3|A0A3Q2TXA3_CHICK Uncharacterized protein OS=Ga	NaN	21.0495	2	82.07	0	11.798	56431000
A0A1D5P117	tr|A0A1D5P117|A0A1D5P117_CHICK RNA polymerase II-associated factor 1 homolog OS=Gallus gallus OX=9031 GN=PAF1 PE=3 SV=2	NaN	20.245	3	55.497	0	20.792	33553000
A0A1D5P146	tr|A0A1D5P146|A0A1D5P146_CHICK DNA mismatch repair protein MLH1 OS=Gallus gallus OX=9031 GN=MLH1 PE=2 SV=1	NaN	15.7969	1	84.85	0.0023819	6.3111	2789500
A0A1D5P782;E1BS87;A0A1D5P158	tr|A0A1D5P782|A0A1D5P782_CHICK Sec3-PIP2_bind domain-containing protein OS=Gallus gallus OX=9031 GN=EXOC1 PE=3 SV=1;tr|E1BS87|E1BS87_CHICK Sec3-PIP2_bind domain-containing protein OS=Gallus gallus OX=9031 GN=EXOC1 PE=3 SV=3;tr|A0A1D5P158|A0A1D5P158_CHICK S	NaN	17.8481	1	100.53	0	12.467	10146000
A0A1D5P179	tr|A0A1D5P179|A0A1D5P179_CHICK Complex I-B16.6 OS=Gallus gallus OX=9031 GN=NDUFA13 PE=3 SV=1	NaN	25.111	3	16.777	0	24.514	326150000
A0A1D5P185;H9L3L2	tr|A0A1D5P185|A0A1D5P185_CHICK Coatomer subunit alpha OS=Gallus gallus OX=9031 GN=COPA PE=4 SV=1;tr|H9L3L2|H9L3L2_CHICK Coatomer subunit alpha OS=Gallus gallus OX=9031 GN=COPA PE=4 SV=2	NaN	18.3031	2	129.8	0	13.064	21023000
A0A1D5PH14;A0A1D5P194	tr|A0A1D5PH14|A0A1D5PH14_CHICK Dynein light chain roadblock OS=Gallus gallus OX=9031 GN=DYNLRB1 PE=3 SV=2;tr|A0A1D5P194|A0A1D5P194_CHICK Dynein light chain roadblock OS=Gallus gallus OX=9031 GN=DYNLRB2 PE=3 SV=1	NaN	23.3494	2	10.78	0	15.725	64119000
A0A1D5P198;A0A1D5NXV1;A0A1L1RJP8;F1NW97	tr|A0A1D5P198|A0A1D5P198_CHICK Tubulin alpha chain OS=Gallus gallus OX=9031 GN=LOC100859737 PE=3 SV=2;tr|A0A1D5NXV1|A0A1D5NXV1_CHICK Tubulin alpha chain OS=Gallus gallus OX=9031 GN=LOC100857858 PE=3 SV=2;tr|A0A1L1RJP8|A0A1L1RJP8_CHICK Tubulin alpha chain O	NaN	17.5545	0	51.693	1	-2	4234900
A0A3Q2UJ67;A0A1D5PJX5;A0A1D5P1B0;A0A3Q2UGP2;A0A3Q2U2T5	tr|A0A3Q2UJ67|A0A3Q2UJ67_CHICK Uncharacterized protein OS=Gallus gallus OX=9031 GN=CLASP2 PE=4 SV=1;tr|A0A1D5PJX5|A0A1D5PJX5_CHICK Uncharacterized protein OS=Gallus gallus OX=9031 GN=CLASP2 PE=4 SV=1;tr|A0A1D5P1B0|A0A1D5P1B0_CHICK Uncharacterized protein O	NaN	20.3366	4	160.46	0	67.268	109900000
A0A1D5P1E1	tr|A0A1D5P1E1|A0A1D5P1E1_CHICK Tripeptidyl aminopeptidase OS=Gallus gallus OX=9031 GN=TPP1 PE=4 SV=2	NaN	22.6119	3	62.884	0	19.019	141020000
A0A1D5P1F4	tr|A0A1D5P1F4|A0A1D5P1F4_CHICK E3 ubiquitin-protein ligase RING2 OS=Gallus gallus OX=9031 GN=RNF2 PE=4 SV=1	NaN	20.7781	1	37.591	0.00043783	7.5339	25175000
A0A1D5P1J7	tr|A0A1D5P1J7|A0A1D5P1J7_CHICK ATP synthase membrane subunit f OS=Gallus gallus OX=9031 GN=ATP5J2 PE=3 SV=1	NaN	23.9905	3	10.308	0	21.365	66669000
A0A1D5PW21;A0A1D5P1Q3	tr|A0A1D5PW21|A0A1D5PW21_CHICK Enhancer of mRNA-decapping protein 4 OS=Gallus gallus OX=9031 GN=EDC4 PE=3 SV=1;tr|A0A1D5P1Q3|A0A1D5P1Q3_CHICK Enhancer of mRNA-decapping protein 4 OS=Gallus gallus OX=9031 GN=EDC4 PE=3 SV=1	NaN	19.8869	5	148.95	0	93.409	57202000
A0A1D5P1T0	tr|A0A1D5P1T0|A0A1D5P1T0_CHICK Uncharacterized protein OS=Gallus gallus OX=9031 GN=RALA PE=3 SV=1	NaN	24.2367	2	23.548	0	36.543	177920000
A0A1D5P1U2	tr|A0A1D5P1U2|A0A1D5P1U2_CHICK Pyruvate dehydrogenase E1 component subunit beta OS=Gallus gallus OX=9031 GN=PDHB PE=4 SV=2	NaN	26.0686	9	38.877	0	145.33	1407600000
A0A1D5P1U9;A0A1D5P9H5	tr|A0A1D5P1U9|A0A1D5P1U9_CHICK Ubiquitin carboxyl-terminal hydrolase OS=Gallus gallus OX=9031 GN=USP15 PE=3 SV=2;tr|A0A1D5P9H5|A0A1D5P9H5_CHICK Ubiquitin carboxyl-terminal hydrolase OS=Gallus gallus OX=9031 GN=USP15 PE=3 SV=2	NaN	17.2938	1	109.06	0.00044763	7.8949	8033800
A0A1D5P1W7	tr|A0A1D5P1W7|A0A1D5P1W7_CHICK Importin N-terminal domain-containing protein OS=Gallus gallus OX=9031 GN=KPNB1 PE=3 SV=2	NaN	24.9005	8	97.332	0	180.06	1252700000
A0A1L1RZN7;A0A1D5PT82;A0A1D5P1X0	tr|A0A1L1RZN7|A0A1L1RZN7_CHICK J domain-containing protein OS=Gallus gallus OX=9031 GN=DNAJB12 PE=4 SV=1;tr|A0A1D5PT82|A0A1D5PT82_CHICK J domain-containing protein OS=Gallus gallus OX=9031 GN=DNAJB12 PE=4 SV=1;tr|A0A1D5P1X0|A0A1D5P1X0_CHICK J domain-contai	NaN	21.2489	3	39.278	0	18.574	39873000
A0A1L1RZD7;A0A1D5P203	tr|A0A1L1RZD7|A0A1L1RZD7_CHICK Bifunctional lysine-specific demethylase and histidyl-hydroxylase OS=Gallus gallus OX=9031 GN=MINA PE=3 SV=1;tr|A0A1D5P203|A0A1D5P203_CHICK Bifunctional lysine-specific demethylase and histidyl-hydroxylase OS=Gallus gallus OX	NaN	22.2428	1	54.011	0	13.896	99258000
A0A1D5P245;A0A3Q2U0D3	tr|A0A1D5P245|A0A1D5P245_CHICK Uncharacterized protein OS=Gallus gallus OX=9031 GN=TMEM141 PE=4 SV=1;tr|A0A3Q2U0D3|A0A3Q2U0D3_CHICK Uncharacterized protein OS=Gallus gallus OX=9031 GN=TMEM141 PE=4 SV=1	NaN	21.2421	1	15.004	0	46.056	17363000
A0A1D5P251	tr|A0A1D5P251|A0A1D5P251_CHICK Uncharacterized protein OS=Gallus gallus OX=9031 GN=MAP1S PE=4 SV=2	NaN	22.207	6	147.2	0	49.514	295330000
A0A1D5P2B1;Q9YH18;F1NWV0;A0A452J833	tr|A0A1D5P2B1|A0A1D5P2B1_CHICK Protein quaking OS=Gallus gallus OX=9031 GN=QKI PE=4 SV=2;sp|Q9YH18|QKI_CHICK Protein quaking OS=Gallus gallus OX=9031 GN=QKI PE=2 SV=2;tr|F1NWV0|F1NWV0_CHICK Protein quaking OS=Gallus gallus OX=9031 GN=QKI PE=4 SV=2;tr|A0A45	NaN	24.68	6	36.725	0	60.573	403200000
A0A1D5P2D9;A0A3Q2UA96	tr|A0A1D5P2D9|A0A1D5P2D9_CHICK T-complex protein 1 subunit gamma OS=Gallus gallus OX=9031 GN=LOC101751456 PE=3 SV=2;tr|A0A3Q2UA96|A0A3Q2UA96_CHICK T-complex protein 1 subunit gamma OS=Gallus gallus OX=9031 GN=CCT3 PE=3 SV=1	NaN	27.1771	28	59.302	0	323.31	4856000000
A0A1D5P2F3;A0A3Q2UE29;A0A1D5PEV5;A0A3Q2UC74;A0A3Q2TRS0;A0A3Q2TWI9;A0A3Q2U8S5;A0A3Q2U6V1	tr|A0A1D5P2F3|A0A1D5P2F3_CHICK Hexokinase OS=Gallus gallus OX=9031 GN=HK2 PE=3 SV=2;tr|A0A3Q2UE29|A0A3Q2UE29_CHICK Hexokinase OS=Gallus gallus OX=9031 GN=HK2 PE=3 SV=1;tr|A0A1D5PEV5|A0A1D5PEV5_CHICK Hexokinase OS=Gallus gallus OX=9031 GN=HK2 PE=3 SV=2;tr|A	NaN	23.7323	12	98.885	0	164.21	613160000
A0A3Q2UIX5;A0A1D5P2F6	tr|A0A3Q2UIX5|A0A3Q2UIX5_CHICK Serine/threonine-protein phosphatase OS=Gallus gallus OX=9031 GN=LOC101748851 PE=3 SV=1;tr|A0A1D5P2F6|A0A1D5P2F6_CHICK Serine/threonine-protein phosphatase OS=Gallus gallus OX=9031 GN=LOC101748851 PE=3 SV=2	NaN	17.8705	1	57.384	0	11.337	5272000
A0A1D5P2H8	tr|A0A1D5P2H8|A0A1D5P2H8_CHICK Prenylcys_lyase domain-containing protein OS=Gallus gallus OX=9031 GN=PCYOX1L PE=3 SV=2	26.0227	22.0381	3	55.014	0	26.818	1304600000
A0A1D5P2K1	tr|A0A1D5P2K1|A0A1D5P2K1_CHICK UV excision repair protein RAD23 OS=Gallus gallus OX=9031 GN=RAD23A PE=3 SV=2	NaN	22.8161	4	39.373	0	61.418	103380000
A0A1D5P2N4;A0A1D5PWN1	tr|A0A1D5P2N4|A0A1D5P2N4_CHICK GTP-binding protein 1 OS=Gallus gallus OX=9031 GN=GTPBP1 PE=4 SV=1;tr|A0A1D5PWN1|A0A1D5PWN1_CHICK GTP-binding protein 1 OS=Gallus gallus OX=9031 GN=GTPBP1 PE=4 SV=1	NaN	19.7286	1	72.214	0.00044189	7.6705	27801000
A0A1D5P2Q1	tr|A0A1D5P2Q1|A0A1D5P2Q1_CHICK SAC domain-containing protein OS=Gallus gallus OX=9031 GN=SACM1L PE=4 SV=2	NaN	21.4908	3	67.45	0	36.815	111980000
F1NW17;A0A1D5P2W2;A0A3Q3AYW8;A0A1D5PFM4	tr|F1NW17|F1NW17_CHICK Uncharacterized protein OS=Gallus gallus OX=9031 GN=ESYT2 PE=3 SV=3;tr|A0A1D5P2W2|A0A1D5P2W2_CHICK Uncharacterized protein OS=Gallus gallus OX=9031 GN=ESYT2 PE=3 SV=1;tr|A0A3Q3AYW8|A0A3Q3AYW8_CHICK Uncharacterized protein OS=Gallus g	NaN	19.3846	2	95.977	0	12.599	29432000
A0A1D5P2W8	tr|A0A1D5P2W8|A0A1D5P2W8_CHICK TOG domain-containing protein OS=Gallus gallus OX=9031 GN=RANBP6 PE=4 SV=2	NaN	21.9697	8	89.238	0	106.15	160180000
A0A1D5P2Y5	tr|A0A1D5P2Y5|A0A1D5P2Y5_CHICK P-type domain-containing protein OS=Gallus gallus OX=9031 GN=GAAGSD PE=3 SV=2	NaN	18.3175	1	104.53	0.0081361	5.7311	13393000
A0A1D5P2Y6	tr|A0A1D5P2Y6|A0A1D5P2Y6_CHICK PBX homeobox interacting protein 1 OS=Gallus gallus OX=9031 GN=PBXIP1 PE=4 SV=1	NaN	19.8669	1	67.263	0.00044111	7.6302	24861000
A0A1D5P315;Q5ZJJ1;F1NLA7	tr|A0A1D5P315|A0A1D5P315_CHICK Uncharacterized protein OS=Gallus gallus OX=9031 GN=ZC3H11B PE=4 SV=1;sp|Q5ZJJ1|ZC11A_CHICK Zinc finger CCCH domain-containing protein 11A OS=Gallus gallus OX=9031 GN=ZC3H11A PE=2 SV=1;tr|F1NLA7|F1NLA7_CHICK Uncharacterized p	NaN	21.8591	6	72.728	0	57.312	125540000
F1NVL5;A0A1D5PEL3;A0A1D5P321	tr|F1NVL5|F1NVL5_CHICK Septin-5 OS=Gallus gallus OX=9031 GN=SEPT5 PE=3 SV=4;tr|A0A1D5PEL3|A0A1D5PEL3_CHICK Septin-5 OS=Gallus gallus OX=9031 GN=SEPT5 PE=3 SV=2;tr|A0A1D5P321|A0A1D5P321_CHICK Septin-5 OS=Gallus gallus OX=9031 GN=SEPT5 PE=3 SV=2	NaN	19.4799	2	42.765	0	14.297	16818000
A0A1D5P338	tr|A0A1D5P338|A0A1D5P338_CHICK Glutathione reductase OS=Gallus gallus OX=9031 GN=GSR PE=3 SV=1	NaN	20.8315	4	50.415	0	29.644	42918000
P04268;A0A1D5P342;A0A1D5PSX3;A0A1D5NT47;A0A452J839;F1NK75	sp|P04268|TPM1_CHICK Tropomyosin alpha-1 chain OS=Gallus gallus OX=9031 GN=TPM1 PE=1 SV=2;tr|A0A1D5P342|A0A1D5P342_CHICK Tropomyosin alpha-1 chain OS=Gallus gallus OX=9031 GN=TPM1 PE=3 SV=2;tr|A0A1D5PSX3|A0A1D5PSX3_CHICK Tropomyosin alpha-1 chain OS=Gallus	NaN	24.0408	3	32.765	0	42.461	276140000
A0A3Q3AI12;A0A1D5P344	tr|A0A3Q3AI12|A0A3Q3AI12_CHICK Kinesin light chain OS=Gallus gallus OX=9031 GN=KLC2 PE=3 SV=1;tr|A0A1D5P344|A0A1D5P344_CHICK Kinesin light chain OS=Gallus gallus OX=9031 GN=KLC2 PE=3 SV=2	NaN	21.3966	2	61.627	0	18.582	93861000
A0A1D5P356;A0A3Q2U4I3;A0A3Q3AZ91	tr|A0A1D5P356|A0A1D5P356_CHICK Uncharacterized protein OS=Gallus gallus OX=9031 GN=ABCB8 PE=4 SV=2;tr|A0A3Q2U4I3|A0A3Q2U4I3_CHICK Uncharacterized protein OS=Gallus gallus OX=9031 GN=ABCB8 PE=4 SV=1;tr|A0A3Q3AZ91|A0A3Q3AZ91_CHICK Uncharacterized protein OS=	NaN	20.889	5	78.811	0	32.637	89328000
A0A1D5P378;A0A3Q2U3D5;A0A1D5PSP5;A0A1D5PBQ5;A0A3Q2UDB9	tr|A0A1D5P378|A0A1D5P378_CHICK Uncharacterized protein OS=Gallus gallus OX=9031 GN=SART3 PE=4 SV=2;tr|A0A3Q2U3D5|A0A3Q2U3D5_CHICK Uncharacterized protein OS=Gallus gallus OX=9031 GN=SART3 PE=4 SV=1;tr|A0A1D5PSP5|A0A1D5PSP5_CHICK Uncharacterized protein OS=	NaN	22.1427	5	105.68	0	62.142	240790000
A0A1D5P384	tr|A0A1D5P384|A0A1D5P384_CHICK Complex I-B18 OS=Gallus gallus OX=9031 GN=NDUFB7 PE=3 SV=2	NaN	23.6853	3	18.215	0	51.607	107910000
A0A1D5P3B1	tr|A0A1D5P3B1|A0A1D5P3B1_CHICK 60S ribosomal protein L11 OS=Gallus gallus OX=9031 GN=RPL11 PE=3 SV=1	NaN	27.5656	4	20.233	0	82.486	1986400000
A0A1D5P3B2;A0A3Q2UG09	tr|A0A1D5P3B2|A0A1D5P3B2_CHICK Condensin complex subunit 2 OS=Gallus gallus OX=9031 GN=NCAPH PE=3 SV=1;tr|A0A3Q2UG09|A0A3Q2UG09_CHICK Condensin complex subunit 2 OS=Gallus gallus OX=9031 GN=NCAPH PE=3 SV=1	NaN	22.0697	6	78.502	0	123.7	158470000
A0A1D5PBM6;A0A1D5P3B3;A0A1D5PKE1	tr|A0A1D5PBM6|A0A1D5PBM6_CHICK Complex I-49kD OS=Gallus gallus OX=9031 GN=NDUFS2 PE=3 SV=2;tr|A0A1D5P3B3|A0A1D5P3B3_CHICK Complex I-49kD OS=Gallus gallus OX=9031 GN=NDUFS2 PE=3 SV=2;tr|A0A1D5PKE1|A0A1D5PKE1_CHICK Complex I-49kD OS=Gallus gallus OX=9031 GN=	NaN	23.4726	6	84.612	0	43.603	395750000
Q5ZIY5;A0A1D5P3G1	sp|Q5ZIY5|2ABD_CHICK Serine/threonine-protein phosphatase 2A 55 kDa regulatory subunit B delta isoform OS=Gallus gallus OX=9031 GN=PPP2R2D PE=2 SV=1;tr|A0A1D5P3G1|A0A1D5P3G1_CHICK Serine/threonine-protein phosphatase 2A 55 kDa regulatory subunit B OS=Gallu	NaN	20.0188	1	52.015	0.00043478	7.4636	20184000
Q5ZIR1;A0A1D5P3G5	sp|Q5ZIR1|SHLB1_CHICK Endophilin-B1 OS=Gallus gallus OX=9031 GN=SH3GLB1 PE=2 SV=1;tr|A0A1D5P3G5|A0A1D5P3G5_CHICK Endophilin-B1 OS=Gallus gallus OX=9031 GN=SH3GLB1 PE=4 SV=2	NaN	21.8674	2	40.795	0	52.541	65042000
A0A1D5P3H2;A0A1D5P859;A0A3Q3AHK5	tr|A0A1D5P3H2|A0A1D5P3H2_CHICK Guanylate cyclase OS=Gallus gallus OX=9031 GN=LOC107055115 PE=3 SV=2;tr|A0A1D5P859|A0A1D5P859_CHICK Guanylate cyclase OS=Gallus gallus OX=9031 GN=LOC107055115 PE=3 SV=2;tr|A0A3Q3AHK5|A0A3Q3AHK5_CHICK Guanylate cyclase OS=Gall	NaN	14.3277	1	120.88	0.0077807	5.751	1233700
A0A1D5P3I6	tr|A0A1D5P3I6|A0A1D5P3I6_CHICK Peptidylprolyl isomerase OS=Gallus gallus OX=9031 GN=FKBP3 PE=4 SV=1	NaN	23.9513	6	62.84	0	99.525	535260000
A0A3Q2U252;A0A1D5P3J7	tr|A0A3Q2U252|A0A3Q2U252_CHICK Pyr_redox_2 domain-containing protein OS=Gallus gallus OX=9031 PE=4 SV=1;tr|A0A1D5P3J7|A0A1D5P3J7_CHICK Pyr_redox_2 domain-containing protein OS=Gallus gallus OX=9031 PE=4 SV=2	NaN	21.1172	2	42.256	0	16.709	54593000
A0A1D5P3J8	tr|A0A1D5P3J8|A0A1D5P3J8_CHICK Serine hydroxymethyltransferase OS=Gallus gallus OX=9031 GN=SHMT1 PE=3 SV=3	NaN	21.7238	2	52.475	0	15.693	58880000
A0A1D5P3K4	tr|A0A1D5P3K4|A0A1D5P3K4_CHICK NADH dehydrogenase [ubiquinone] 1 alpha subcomplex subunit 8 OS=Gallus gallus OX=9031 GN=NDUFA8 PE=3 SV=1	NaN	24.0092	5	20.125	0	46.471	151960000
A0A1D5P3L6;A0A3Q2UCF0;E1C8G8;A0A3Q2U6Y4	tr|A0A1D5P3L6|A0A1D5P3L6_CHICK Uncharacterized protein OS=Gallus gallus OX=9031 GN=PRPF39 PE=4 SV=2;tr|A0A3Q2UCF0|A0A3Q2UCF0_CHICK Uncharacterized protein OS=Gallus gallus OX=9031 GN=PRPF39 PE=4 SV=1;tr|E1C8G8|E1C8G8_CHICK Uncharacterized protein OS=Gallus	NaN	21.9409	3	64.047	0	29.053	116750000
A0A1D5P3M1;A0A1D5PU39;E1C2A1	tr|A0A1D5P3M1|A0A1D5P3M1_CHICK LRRcap domain-containing protein OS=Gallus gallus OX=9031 GN=ANP32A PE=4 SV=2;tr|A0A1D5PU39|A0A1D5PU39_CHICK LRRcap domain-containing protein OS=Gallus gallus OX=9031 GN=ANP32A PE=4 SV=2;tr|E1C2A1|E1C2A1_CHICK LRRcap domain-c	NaN	22.6504	3	32.17	0	22.613	65834000
A0A3Q3AZY2;A0A1D5P3M6;A0A3Q2UML9;A0A3Q2UC38;A0A3Q2TWR9;A0A3Q3ACZ7;A0A3Q2U1C4;A0A3Q2UAJ6	tr|A0A3Q3AZY2|A0A3Q3AZY2_CHICK Uncharacterized protein OS=Gallus gallus OX=9031 GN=CNNM4 PE=3 SV=1;tr|A0A1D5P3M6|A0A1D5P3M6_CHICK Uncharacterized protein OS=Gallus gallus OX=9031 GN=CNNM4 PE=3 SV=2;tr|A0A3Q2UML9|A0A3Q2UML9_CHICK Uncharacterized protein OS=	NaN	19.2028	2	60.615	0	11.909	17498000
A0A1D5PU43;A0A1L1RUN7;A0A1D5P3S9	tr|A0A1D5PU43|A0A1D5PU43_CHICK Uncharacterized protein OS=Gallus gallus OX=9031 GN=ECI1 PE=3 SV=1;tr|A0A1L1RUN7|A0A1L1RUN7_CHICK Uncharacterized protein OS=Gallus gallus OX=9031 GN=ECI1 PE=3 SV=2;tr|A0A1D5P3S9|A0A1D5P3S9_CHICK Uncharacterized protein OS=Ga	NaN	24.9163	8	34.264	0	82.418	633280000
A0A1D5P3U0;Q98SE2;Q98TR0	tr|A0A1D5P3U0|A0A1D5P3U0_CHICK Uncharacterized protein OS=Gallus gallus OX=9031 GN=U2AF1 PE=4 SV=1;tr|Q98SE2|Q98SE2_CHICK U2snRNP auxiliary factor small subunit OS=Gallus gallus OX=9031 GN=U2AF1 PE=2 SV=1;tr|Q98TR0|Q98TR0_CHICK U2snRNP auxiliary factor sma	NaN	21.7355	2	27.711	0	12.029	31424000
A0A3Q2U2M9;E1C0T6;A0A1D5P3U4;A0A1D5PU09	tr|A0A3Q2U2M9|A0A3Q2U2M9_CHICK PH domain-containing protein OS=Gallus gallus OX=9031 GN=FERMT2 PE=3 SV=1;tr|E1C0T6|E1C0T6_CHICK PH domain-containing protein OS=Gallus gallus OX=9031 GN=FERMT2 PE=3 SV=3;tr|A0A1D5P3U4|A0A1D5P3U4_CHICK PH domain-containing pr	NaN	22.327	4	77.449	0	30.693	189400000
A0A1D5P3Y2;A0A3Q2U159	tr|A0A1D5P3Y2|A0A1D5P3Y2_CHICK Serine/threonine-protein phosphatase OS=Gallus gallus OX=9031 GN=PPP3CA PE=3 SV=2;tr|A0A3Q2U159|A0A3Q2U159_CHICK Serine/threonine-protein phosphatase OS=Gallus gallus OX=9031 GN=PPP3CA PE=3 SV=1	NaN	18.3491	1	53.094	0.0030912	6.0774	7346300
A0A1D5P3Y4	tr|A0A1D5P3Y4|A0A1D5P3Y4_CHICK KOW domain-containing protein OS=Gallus gallus OX=9031 GN=MRPL24 PE=3 SV=1	NaN	22.6732	4	24.995	0	22.232	86948000
A0A1D5P407	tr|A0A1D5P407|A0A1D5P407_CHICK Uncharacterized protein OS=Gallus gallus OX=9031 GN=SRSF5A PE=3 SV=1	NaN	19.9875	1	32.223	0.0023885	6.3358	12474000
A0A1D5P411;A0A1D5PPI6;A0A3Q3AMH7	tr|A0A1D5P411|A0A1D5P411_CHICK RRM domain-containing protein OS=Gallus gallus OX=9031 GN=FUS PE=4 SV=2;tr|A0A1D5PPI6|A0A1D5PPI6_CHICK RRM domain-containing protein OS=Gallus gallus OX=9031 GN=FUS PE=4 SV=2;tr|A0A3Q3AMH7|A0A3Q3AMH7_CHICK RRM domain-containi	NaN	25.6954	4	49.402	0	58.812	652040000
A0A1D5P4Z4;A0A1D5P415;A0A3Q3B189;A0A3Q2U9Q0;E1C7I8	tr|A0A1D5P4Z4|A0A1D5P4Z4_CHICK Transmembrane protein 63B OS=Gallus gallus OX=9031 PE=3 SV=2;tr|A0A1D5P415|A0A1D5P415_CHICK Transmembrane protein 63B OS=Gallus gallus OX=9031 PE=3 SV=2;tr|A0A3Q3B189|A0A3Q3B189_CHICK Transmembrane protein 63B OS=Gallus gallu	NaN	20.0551	1	86.889	0.0095238	5.6729	26147000
F1P1L1;A0A1D5P419;A0A3Q2U8J3	tr|F1P1L1|F1P1L1_CHICK Uncharacterized protein OS=Gallus gallus OX=9031 GN=DPP9 PE=4 SV=4;tr|A0A1D5P419|A0A1D5P419_CHICK Uncharacterized protein OS=Gallus gallus OX=9031 GN=DPP9 PE=4 SV=1;tr|A0A3Q2U8J3|A0A3Q2U8J3_CHICK Uncharacterized protein OS=Gallus gal	NaN	19.6433	1	98.449	0.00047483	9.9457	31936000
A0A1D5P426;Q5ZIE1	tr|A0A1D5P426|A0A1D5P426_CHICK Transcription initiation factor IIE subunit beta OS=Gallus gallus OX=9031 GN=GTF2E2 PE=4 SV=1;tr|Q5ZIE1|Q5ZIE1_CHICK Transcription initiation factor IIE subunit beta OS=Gallus gallus OX=9031 GN=GTF2E2 PE=2 SV=1	NaN	20.7116	1	31.296	0.00043592	7.4845	27475000
F1NDC2;A0A1D5P462	tr|F1NDC2|F1NDC2_CHICK 40S ribosomal protein S23 OS=Gallus gallus OX=9031 GN=RPS23 PE=3 SV=2;tr|A0A1D5P462|A0A1D5P462_CHICK 40S ribosomal protein S23 OS=Gallus gallus OX=9031 GN=RPS23 PE=3 SV=2	NaN	25.4878	3	15.807	0	21.793	282330000
A0A1D5P470	tr|A0A1D5P470|A0A1D5P470_CHICK Glutathione S-transferase OS=Gallus gallus OX=9031 GN=LOC107050492 PE=3 SV=2	NaN	23.3512	4	25.449	0	38.981	149810000
A0A3Q3AA34;A0A1D5PPZ0;A0A1D5P6I5;E1BSG5;A0A1D5P490	tr|A0A3Q3AA34|A0A3Q3AA34_CHICK Uncharacterized protein OS=Gallus gallus OX=9031 GN=EIF4G1 PE=3 SV=1;tr|A0A1D5PPZ0|A0A1D5PPZ0_CHICK Uncharacterized protein OS=Gallus gallus OX=9031 GN=EIF4G1 PE=3 SV=2;tr|A0A1D5P6I5|A0A1D5P6I5_CHICK Uncharacterized protein O	NaN	20.8953	4	172.44	0	114.31	136520000
A0A1D5P4B1	tr|A0A1D5P4B1|A0A1D5P4B1_CHICK NADH dehydrogenase [ubiquinone] 1 alpha subcomplex subunit 6 OS=Gallus gallus OX=9031 GN=NDUFA6 PE=3 SV=1	NaN	23.7562	1	14.396	0.0023502	6.2016	85014000
P38024;R9PXP8;A0A1D5PH07;A0A3Q2U811;A0A1D5P4C5;A0A3Q3A5F2;A0A3Q2ULT4;A0A452J876	sp|P38024|PUR6_CHICK Multifunctional protein ADE2 OS=Gallus gallus OX=9031 GN=AIRC PE=2 SV=1;tr|R9PXP8|R9PXP8_CHICK AIR carboxylase OS=Gallus gallus OX=9031 GN=PAICS PE=3 SV=1;tr|A0A1D5PH07|A0A1D5PH07_CHICK AIR carboxylase OS=Gallus gallus OX=9031 GN=PAICS	NaN	25.4969	16	47.24	0	226.83	994390000
A0A1D5P4C7	tr|A0A1D5P4C7|A0A1D5P4C7_CHICK Amidohydro-rel domain-containing protein OS=Gallus gallus OX=9031 GN=LOC107053190 PE=3 SV=2	NaN	19.4463	2	60.384	0	25.777	20717000
A0A1D5P4I8;A0A3Q2TZL5	tr|A0A1D5P4I8|A0A1D5P4I8_CHICK FAM193_C domain-containing protein OS=Gallus gallus OX=9031 GN=FAM193B PE=3 SV=2;tr|A0A3Q2TZL5|A0A3Q2TZL5_CHICK FAM193_C domain-containing protein OS=Gallus gallus OX=9031 GN=FAM193B PE=3 SV=1	NaN	18.1024	1	95.325	0.0004529	8.0865	10694000
E1BVD4;A0A1D5P4L1;A0A1D5PCC0;A0A1D5PS38	tr|E1BVD4|E1BVD4_CHICK Uncharacterized protein OS=Gallus gallus OX=9031 GN=SLC39A11 PE=4 SV=3;tr|A0A1D5P4L1|A0A1D5P4L1_CHICK Uncharacterized protein OS=Gallus gallus OX=9031 GN=SLC39A11 PE=4 SV=2;tr|A0A1D5PCC0|A0A1D5PCC0_CHICK Uncharacterized protein OS=Ga	NaN	20.8944	1	35.575	0	11.912	19491000
Q5ZKK1;A0A1D5P4N3;A0A1D5P9Q6	sp|Q5ZKK1|MARE2_CHICK Microtubule-associated protein RP/EB family member 2 OS=Gallus gallus OX=9031 GN=MAPRE2 PE=2 SV=1;tr|A0A1D5P4N3|A0A1D5P4N3_CHICK Microtubule-associated protein RP/EB family member 2 OS=Gallus gallus OX=9031 GN=MAPRE2 PE=3 SV=2;tr|A0A1	NaN	20.9751	2	38.139	0	17.627	35043000
A0A1D5P4Q8	tr|A0A1D5P4Q8|A0A1D5P4Q8_CHICK Uncharacterized protein OS=Gallus gallus OX=9031 GN=TTLL8 PE=3 SV=2	NaN	19.6702	1	20.853	0.0064078	5.8799	5005800
A0A1L1RZR1;E1BY52;A0A1D5P4R2;P16924	tr|A0A1L1RZR1|A0A1L1RZR1_CHICK Procollagen-proline 4-dioxygenase OS=Gallus gallus OX=9031 GN=P4HA1 PE=3 SV=2;tr|E1BY52|E1BY52_CHICK Procollagen-proline 4-dioxygenase OS=Gallus gallus OX=9031 GN=P4HA1 PE=3 SV=2;tr|A0A1D5P4R2|A0A1D5P4R2_CHICK Procollagen-pro	NaN	23.6533	4	61.044	0	94.316	356210000
F1NF89;A0A1D5PGS1;A0A1D5P4V9	tr|F1NF89|F1NF89_CHICK 40S ribosomal protein S24 OS=Gallus gallus OX=9031 GN=RPS24 PE=3 SV=4;tr|A0A1D5PGS1|A0A1D5PGS1_CHICK 40S ribosomal protein S24 OS=Gallus gallus OX=9031 GN=RPS24 PE=3 SV=1;tr|A0A1D5P4V9|A0A1D5P4V9_CHICK 40S ribosomal protein S24 OS=Ga	NaN	25.1594	5	15.197	0	40.539	224850000
A0A1D5P4W0	tr|A0A1D5P4W0|A0A1D5P4W0_CHICK Uncharacterized protein OS=Gallus gallus OX=9031 GN=RCC1 PE=4 SV=2	NaN	22.0792	2	44.522	0	13.586	79758000
A0A1D5P4W9;A0A1D5P6Q8;P46896	tr|A0A1D5P4W9|A0A1D5P4W9_CHICK Solute carrier family 2, facilitated glucose transporter member 1 OS=Gallus gallus OX=9031 GN=SLC2A1 PE=3 SV=2;tr|A0A1D5P6Q8|A0A1D5P6Q8_CHICK Solute carrier family 2, facilitated glucose transporter member 1 OS=Gallus gallus	NaN	22.1001	2	50.665	0	18.836	44957000
A0A3Q3AD57;F1NR84;A0A1D5PT84;A0A1D5P4X0	tr|A0A3Q3AD57|A0A3Q3AD57_CHICK AIP3 domain-containing protein OS=Gallus gallus OX=9031 GN=KIAA1217 PE=4 SV=1;tr|F1NR84|F1NR84_CHICK AIP3 domain-containing protein OS=Gallus gallus OX=9031 GN=KIAA1217 PE=4 SV=2;tr|A0A1D5PT84|A0A1D5PT84_CHICK AIP3 domain-con	NaN	17.0914	1	151.58	1	-2	11451000
A0A1D5P4Z5	tr|A0A1D5P4Z5|A0A1D5P4Z5_CHICK Uncharacterized protein OS=Gallus gallus OX=9031 GN=PEF1 PE=4 SV=2	NaN	19.2555	1	24.363	0.0077778	5.7506	5007000
A0A1D5P522;P05094;A0A1D5P9P3;A0A1D5PF13	tr|A0A1D5P522|A0A1D5P522_CHICK Alpha-actinin cytoskeletal isoform OS=Gallus gallus OX=9031 GN=ACTN1 PE=3 SV=2;sp|P05094|ACTN1_CHICK Alpha-actinin-1 OS=Gallus gallus OX=9031 GN=ACTN1 PE=1 SV=3;tr|A0A1D5P9P3|A0A1D5P9P3_CHICK Alpha-actinin-1 OS=Gallus gallus	NaN	21.6513	5	98.952	0	48.336	171270000
A0A1D5PH81;A0A1D5P537;F1P458	tr|A0A1D5PH81|A0A1D5PH81_CHICK Sulfhydryl oxidase OS=Gallus gallus OX=9031 GN=QSOX2 PE=3 SV=2;tr|A0A1D5P537|A0A1D5P537_CHICK Sulfhydryl oxidase OS=Gallus gallus OX=9031 GN=QSOX2 PE=3 SV=2;tr|F1P458|F1P458_CHICK Sulfhydryl oxidase OS=Gallus gallus OX=9031 G	NaN	20.5075	3	71.733	0	26.262	56642000
A0A1D5P560	tr|A0A1D5P560|A0A1D5P560_CHICK Integrin beta OS=Gallus gallus OX=9031 GN=ITGB5 PE=3 SV=1	NaN	19.5824	1	88.377	0.005723	5.9732	32187000
E1BRJ7;A0A1D5P579	tr|E1BRJ7|E1BRJ7_CHICK FAD-binding FR-type domain-containing protein OS=Gallus gallus OX=9031 GN=OXNAD1 PE=4 SV=2;tr|A0A1D5P579|A0A1D5P579_CHICK FAD-binding FR-type domain-containing protein OS=Gallus gallus OX=9031 GN=OXNAD1 PE=4 SV=1	NaN	19.8839	1	31.568	0.0070737	5.7884	13545000
A0A1D5P592	tr|A0A1D5P592|A0A1D5P592_CHICK Uncharacterized protein OS=Gallus gallus OX=9031 GN=PCCB PE=4 SV=1	NaN	22.1699	5	57.502	0	144.44	141560000
A0A1D5P5B2	tr|A0A1D5P5B2|A0A1D5P5B2_CHICK Butyryl-CoA dehydrogenase OS=Gallus gallus OX=9031 GN=IVD PE=3 SV=1	NaN	22.7593	3	45.845	0	23.491	156190000
A0A1D5PHR2;A0A1D5P5B6	tr|A0A1D5PHR2|A0A1D5PHR2_CHICK Kinesin-like protein OS=Gallus gallus OX=9031 GN=KIF13B PE=3 SV=2;tr|A0A1D5P5B6|A0A1D5P5B6_CHICK Uncharacterized protein OS=Gallus gallus OX=9031 GN=KIF13B PE=3 SV=2	NaN	17.5444	1	83.282	0.0067695	5.8565	6881700
A0A1D5PDN0;A0A1D5PGR2;F1N9Y3;F1NDB6;A0A1D5P5C3;A0A1D5PVL6;E1C492;A0A1D5PPC0;A0A1D5PJ48;A0A3Q2UI75	tr|A0A1D5PDN0|A0A1D5PDN0_CHICK TLE family member 2, transcriptional corepressor OS=Gallus gallus OX=9031 PE=3 SV=2;tr|A0A1D5PGR2|A0A1D5PGR2_CHICK Uncharacterized protein OS=Gallus gallus OX=9031 GN=TLE1 PE=3 SV=1;tr|F1N9Y3|F1N9Y3_CHICK Uncharacterized prot	NaN	21.8342	2	38.253	0	22.206	71041000
A0A1D5P5J0;A0A1D5NX76	tr|A0A1D5P5J0|A0A1D5P5J0_CHICK FoP_duplication domain-containing protein OS=Gallus gallus OX=9031 GN=CHTOP PE=4 SV=1;tr|A0A1D5NX76|A0A1D5NX76_CHICK Uncharacterized protein OS=Gallus gallus OX=9031 GN=CHTOP PE=4 SV=2	NaN	25.5689	4	26.154	0	53.005	447960000
A0A1D5P5L5	tr|A0A1D5P5L5|A0A1D5P5L5_CHICK Methyltransf_11 domain-containing protein OS=Gallus gallus OX=9031 GN=LOC107048987 PE=4 SV=1	NaN	23.5503	3	30.318	0	122.8	184260000
Q5ZI00;A0A1D5P5L8	tr|Q5ZI00|Q5ZI00_CHICK Epimerase domain-containing protein OS=Gallus gallus OX=9031 GN=NDUFA9 PE=2 SV=1;tr|A0A1D5P5L8|A0A1D5P5L8_CHICK Epimerase domain-containing protein OS=Gallus gallus OX=9031 GN=NDUFA9 PE=4 SV=2	NaN	23.633	6	43.079	0	46.417	286200000
A0A1D5P5M6;E1BQD1	tr|A0A1D5P5M6|A0A1D5P5M6_CHICK Uncharacterized protein OS=Gallus gallus OX=9031 GN=GATD3AL1 PE=4 SV=1;tr|E1BQD1|E1BQD1_CHICK Uncharacterized protein OS=Gallus gallus OX=9031 GN=GATD3AL1 PE=4 SV=4	NaN	21.972	1	26.794	0.0023428	6.1709	74044000
A0A1D5P5T1	tr|A0A1D5P5T1|A0A1D5P5T1_CHICK Eukaryotic translation initiation factor 3 subunit K OS=Gallus gallus OX=9031 GN=EIF3K PE=3 SV=2	NaN	25.94	9	25.13	0	66.174	772470000
A0A1D5P5T8	tr|A0A1D5P5T8|A0A1D5P5T8_CHICK Poly(A) polymerase OS=Gallus gallus OX=9031 GN=PAPOLB PE=3 SV=2	NaN	21.5903	7	82.897	0	43.471	119980000
A0A1D5P5X1	tr|A0A1D5P5X1|A0A1D5P5X1_CHICK Uncharacterized protein OS=Gallus gallus OX=9031 GN=RCN2 PE=4 SV=2	NaN	22.7636	3	35.711	0	83.865	106810000
A0A1D5P5X8	tr|A0A1D5P5X8|A0A1D5P5X8_CHICK Tim44 domain-containing protein OS=Gallus gallus OX=9031 GN=MRPL45 PE=4 SV=2	NaN	22.0916	4	46.477	0	29.388	120670000
A0A1D5P607;F1P4R6	tr|A0A1D5P607|A0A1D5P607_CHICK Uncharacterized protein OS=Gallus gallus OX=9031 GN=MRPS9 PE=3 SV=1;tr|F1P4R6|F1P4R6_CHICK Uncharacterized protein OS=Gallus gallus OX=9031 GN=MRPS9 PE=3 SV=3	NaN	22.6346	5	38.384	0	53.609	156280000
A0A1D5P624	tr|A0A1D5P624|A0A1D5P624_CHICK Uncharacterized protein OS=Gallus gallus OX=9031 GN=UBQLN4 PE=4 SV=1	NaN	22.6667	3	64.027	0	46.48	113190000
A0A1D5P628	tr|A0A1D5P628|A0A1D5P628_CHICK Uncharacterized protein OS=Gallus gallus OX=9031 GN=HSPBP1 PE=4 SV=1	NaN	24.0713	2	35.742	0	89.855	282040000
A0A1D5P629;A0A1L1RXD1;A0A1L1RSN0	tr|A0A1D5P629|A0A1D5P629_CHICK Nop domain-containing protein OS=Gallus gallus OX=9031 GN=NOP56 PE=3 SV=1;tr|A0A1L1RXD1|A0A1L1RXD1_CHICK Nop domain-containing protein OS=Gallus gallus OX=9031 GN=NOP56 PE=3 SV=2;tr|A0A1L1RSN0|A0A1L1RSN0_CHICK Nop domain-cont	NaN	22.5558	5	59.832	0	58.75	178800000
A0A1D5PJH5;A0A1D5PW75;A0A1D5PAU8;A0A1D5PDC1;A0A1D5P650	tr|A0A1D5PJH5|A0A1D5PJH5_CHICK Clathrin heavy chain OS=Gallus gallus OX=9031 GN=CLTCL1 PE=3 SV=2;tr|A0A1D5PW75|A0A1D5PW75_CHICK Clathrin heavy chain OS=Gallus gallus OX=9031 GN=CLTCL1 PE=3 SV=1;tr|A0A1D5PAU8|A0A1D5PAU8_CHICK Clathrin heavy chain OS=Gallus	NaN	16.6263	1	182.81	0.00085361	7.2178	9407600
A0A1D5P655;E1BW56	tr|A0A1D5P655|A0A1D5P655_CHICK Cytoplasmic FMR1-interacting protein OS=Gallus gallus OX=9031 GN=CYFIP1 PE=3 SV=2;tr|E1BW56|E1BW56_CHICK Cytoplasmic FMR1-interacting protein OS=Gallus gallus OX=9031 GN=CYFIP1 PE=3 SV=3	NaN	21.3095	5	145.2	0	38.125	166330000
A0A1D5P668	tr|A0A1D5P668|A0A1D5P668_CHICK tRNA nucleotidyl transferase 1 OS=Gallus gallus OX=9031 GN=TRNT1 PE=3 SV=1	NaN	22.8126	6	49.492	0	68.378	206270000
A0A1D5P6D2	tr|A0A1D5P6D2|A0A1D5P6D2_CHICK COP9 signalosome complex subunit 8 OS=Gallus gallus OX=9031 GN=COPS8 PE=3 SV=2	NaN	22.8214	3	25.608	0	20.385	66706000
A0A1D5P6E8;A0A1D5PFD2	tr|A0A1D5P6E8|A0A1D5P6E8_CHICK AMP-binding domain-containing protein OS=Gallus gallus OX=9031 GN=CDH15 PE=4 SV=2;tr|A0A1D5PFD2|A0A1D5PFD2_CHICK AMP-binding domain-containing protein OS=Gallus gallus OX=9031 GN=CDH15 PE=4 SV=2	NaN	19.8856	3	67.248	0	21.232	32934000
A0A1D5P9K6;A0A1D5P6J0	tr|A0A1D5P9K6|A0A1D5P9K6_CHICK Uncharacterized protein OS=Gallus gallus OX=9031 GN=ACADSB PE=3 SV=2;tr|A0A1D5P6J0|A0A1D5P6J0_CHICK Uncharacterized protein OS=Gallus gallus OX=9031 GN=ACADSB PE=3 SV=2	NaN	19.8427	3	47.292	0	27.605	20685000
A0A1D5P6N1	tr|A0A1D5P6N1|A0A1D5P6N1_CHICK WD_REPEATS_REGION domain-containing protein OS=Gallus gallus OX=9031 GN=WDR43 PE=4 SV=2	NaN	20.4224	3	73.063	0	16.935	50591000
A0A1D5P6Q6	tr|A0A1D5P6Q6|A0A1D5P6Q6_CHICK Uncharacterized protein OS=Gallus gallus OX=9031 PE=4 SV=2	NaN	18.7311	1	28.049	0.00084531	7.0656	4786500
A0A1D5P6R9	tr|A0A1D5P6R9|A0A1D5P6R9_CHICK Ribosome biogenesis regulatory protein OS=Gallus gallus OX=9031 GN=RRS1 PE=3 SV=2	NaN	22.7138	5	39.784	0	37.753	123830000
A0A1D5P6S2	tr|A0A1D5P6S2|A0A1D5P6S2_CHICK FAA_hydrolase domain-containing protein OS=Gallus gallus OX=9031 GN=FAHD2A PE=3 SV=2	NaN	22.8536	3	32.872	0	31.295	113680000
A0A1D5P6S3;A0A1D5PK43;E1BUW5;A0A3Q2UNG1	tr|A0A1D5P6S3|A0A1D5P6S3_CHICK Phosphatidate cytidylyltransferase, mitochondrial OS=Gallus gallus OX=9031 GN=TAMM41 PE=3 SV=1;tr|A0A1D5PK43|A0A1D5PK43_CHICK Phosphatidate cytidylyltransferase, mitochondrial OS=Gallus gallus OX=9031 GN=TAMM41 PE=3 SV=2;tr|E	NaN	20.1648	1	35.127	0.00044883	7.9443	15281000
A0A1D5P6T3	tr|A0A1D5P6T3|A0A1D5P6T3_CHICK Tyrosine-protein kinase receptor OS=Gallus gallus OX=9031 GN=INSR PE=3 SV=2	NaN	17.274	1	149.74	0.0088365	5.6951	9826700
O93319;A0A1D5P6T7	sp|O93319|CAD11_CHICK Cadherin-11 OS=Gallus gallus OX=9031 GN=CDH11 PE=2 SV=1;tr|A0A1D5P6T7|A0A1D5P6T7_CHICK Cadherin-11 OS=Gallus gallus OX=9031 GN=CDH11 PE=4 SV=1	NaN	21.6658	5	87.572	0	75.293	129750000
A0A1D5P6V5	tr|A0A1D5P6V5|A0A1D5P6V5_CHICK Perilipin OS=Gallus gallus OX=9031 GN=PLIN4 PE=3 SV=1	NaN	22.7764	4	45.388	0	128.45	172420000
A0A1D5P6W8	tr|A0A1D5P6W8|A0A1D5P6W8_CHICK Lysine-specific histone demethylase OS=Gallus gallus OX=9031 GN=KDM1A PE=3 SV=2	NaN	20.0793	4	90.539	0	47.496	42098000
A0A1D5PMU0;A0A1D5P6Y6;A0A1D5PWI5;A0A1D5PEL5	tr|A0A1D5PMU0|A0A1D5PMU0_CHICK Phenylalanyl-tRNA synthetase OS=Gallus gallus OX=9031 GN=FARS2 PE=3 SV=1;tr|A0A1D5P6Y6|A0A1D5P6Y6_CHICK Phenylalanyl-tRNA synthetase OS=Gallus gallus OX=9031 GN=FARS2 PE=3 SV=2;tr|A0A1D5PWI5|A0A1D5PWI5_CHICK Phenylalanyl-tRNA	NaN	20.3384	2	48.622	0	11.041	27843000
A0A3Q2TZ20;A0A1D5P6Z4;A0A3Q2U9G4	tr|A0A3Q2TZ20|A0A3Q2TZ20_CHICK Uncharacterized protein OS=Gallus gallus OX=9031 GN=SUGP1 PE=4 SV=1;tr|A0A1D5P6Z4|A0A1D5P6Z4_CHICK Uncharacterized protein OS=Gallus gallus OX=9031 GN=SUGP1 PE=4 SV=1;tr|A0A3Q2U9G4|A0A3Q2U9G4_CHICK Uncharacterized protein OS=	NaN	19.1907	1	73.161	0.00045106	8.0466	20345000
A0A1L1RKA0;A0A1D5P709	tr|A0A1L1RKA0|A0A1L1RKA0_CHICK Uncharacterized protein OS=Gallus gallus OX=9031 GN=DNAJC7 PE=4 SV=2;tr|A0A1D5P709|A0A1D5P709_CHICK Uncharacterized protein OS=Gallus gallus OX=9031 GN=DNAJC7 PE=4 SV=2	NaN	22.7273	5	58.878	0	56.145	243030000
A0A1D5P765	tr|A0A1D5P765|A0A1D5P765_CHICK Transket_pyr domain-containing protein OS=Gallus gallus OX=9031 GN=BCKDHB PE=4 SV=2	NaN	22.0469	1	42.501	0	10.897	64995000
A0A1D5P768	tr|A0A1D5P768|A0A1D5P768_CHICK TPR_REGION domain-containing protein OS=Gallus gallus OX=9031 GN=NAA25 PE=3 SV=1	NaN	20.8807	3	112.3	0	21.099	83019000
A0A3Q2U2R1;A0A3Q2U748;A0A1D5P770;E1C7L0;A0A3Q2U0V6	tr|A0A3Q2U2R1|A0A3Q2U2R1_CHICK Uncharacterized protein OS=Gallus gallus OX=9031 GN=CTBP1 PE=3 SV=1;tr|A0A3Q2U748|A0A3Q2U748_CHICK Uncharacterized protein OS=Gallus gallus OX=9031 GN=CTBP1 PE=3 SV=1;tr|A0A1D5P770|A0A1D5P770_CHICK Uncharacterized protein OS=	NaN	22.7762	2	46.845	0	14.183	136480000
A0A3Q2ULT0;F1P257;A0A1D5P774	tr|A0A3Q2ULT0|A0A3Q2ULT0_CHICK Tripeptidyl-peptidase 2 OS=Gallus gallus OX=9031 GN=TPP2 PE=4 SV=1;tr|F1P257|F1P257_CHICK Tripeptidyl-peptidase 2 OS=Gallus gallus OX=9031 GN=TPP2 PE=4 SV=2;tr|A0A1D5P774|A0A1D5P774_CHICK Tripeptidyl-peptidase 2 OS=Gallus gal	NaN	19.0141	1	141.67	0.0023474	6.1817	34942000
A0A1D5P778;A0A1D5PZ38;A0A1D5PIU0	tr|A0A1D5P778|A0A1D5P778_CHICK YTH domain-containing protein OS=Gallus gallus OX=9031 GN=YTHDF2 PE=4 SV=1;tr|A0A1D5PZ38|A0A1D5PZ38_CHICK YTH domain-containing protein OS=Gallus gallus OX=9031 GN=YTHDF2 PE=4 SV=1;tr|A0A1D5PIU0|A0A1D5PIU0_CHICK YTH domain-co	NaN	24.0256	4	62.505	0	122.12	341540000
A0A1D5P7B5	tr|A0A1D5P7B5|A0A1D5P7B5_CHICK Uncharacterized protein OS=Gallus gallus OX=9031 GN=MRPL3 PE=3 SV=2	NaN	21.5248	1	38.615	0.0038476	6.0438	63363000
A0A1D5P7C6	tr|A0A1D5P7C6|A0A1D5P7C6_CHICK Peptidase_M24 domain-containing protein OS=Gallus gallus OX=9031 GN=PA2G4 PE=3 SV=1	NaN	27.3443	11	43.779	0	176.07	3919000000
A0A1D5P7K7	tr|A0A1D5P7K7|A0A1D5P7K7_CHICK Septin-7 OS=Gallus gallus OX=9031 GN=SEPT7 PE=3 SV=1	NaN	26.4917	1	49.411	0	250.91	1981600000
A0A1D5P7L6;A0A3Q2U387;A0A1D5PIY2	tr|A0A1D5P7L6|A0A1D5P7L6_CHICK Septin-type G domain-containing protein OS=Gallus gallus OX=9031 GN=SEPTIN8 PE=3 SV=2;tr|A0A3Q2U387|A0A3Q2U387_CHICK Septin-type G domain-containing protein OS=Gallus gallus OX=9031 GN=SEPTIN8 PE=3 SV=1;tr|A0A1D5PIY2|A0A1D5PI	NaN	23.0877	2	49.7	0	15.358	169380000
F1NXR8;A0A1D5P7P5	tr|F1NXR8|F1NXR8_CHICK Uncharacterized protein OS=Gallus gallus OX=9031 GN=LUC7L3 PE=3 SV=1;tr|A0A1D5P7P5|A0A1D5P7P5_CHICK Uncharacterized protein OS=Gallus gallus OX=9031 GN=LUC7L3 PE=3 SV=2	NaN	22.0318	2	51.44	0	90.485	81468000
A0A1D5P7Q3	tr|A0A1D5P7Q3|A0A1D5P7Q3_CHICK MRP-S28 domain-containing protein OS=Gallus gallus OX=9031 GN=MRPS35 PE=4 SV=2	NaN	22.801	5	44.094	0	99.716	168080000
A0A1D5P7R1	tr|A0A1D5P7R1|A0A1D5P7R1_CHICK RNA transcription, translation and transport factor protein OS=Gallus gallus OX=9031 GN=C5H14orf166 PE=3 SV=1	NaN	24.0048	4	28.02	0	55.075	269330000
F1NNU3;A0A3Q2UPK4;A0A1D5P7V7	tr|F1NNU3|F1NNU3_CHICK Cysteine desulfurase, mitochondrial OS=Gallus gallus OX=9031 GN=NFS1 PE=3 SV=2;tr|A0A3Q2UPK4|A0A3Q2UPK4_CHICK Cysteine desulfurase, mitochondrial OS=Gallus gallus OX=9031 GN=NFS1 PE=3 SV=1;tr|A0A1D5P7V7|A0A1D5P7V7_CHICK Cysteine desu	NaN	23.7846	7	49.105	0	121.08	404600000
A0A3Q2UJ64;A0A1D5P7X9	tr|A0A3Q2UJ64|A0A3Q2UJ64_CHICK Cytochrome b-c1 complex subunit 7 OS=Gallus gallus OX=9031 GN=UQCRB PE=3 SV=1;tr|A0A1D5P7X9|A0A1D5P7X9_CHICK Cytochrome b-c1 complex subunit 7 OS=Gallus gallus OX=9031 GN=UQCRB PE=3 SV=1	NaN	24.7166	3	13.143	0	19.122	165420000
A0A1D5P7Y8	tr|A0A1D5P7Y8|A0A1D5P7Y8_CHICK AP complex subunit beta OS=Gallus gallus OX=9031 GN=AP2B1 PE=3 SV=2	NaN	22.9255	4	105.65	0	45	350510000
A0A1L1RJ69;A0A3Q2UIW4;A0A3Q2TRR9;A0A3Q2UCG1;A0A1D5P806;A0A1D5PF99	tr|A0A1L1RJ69|A0A1L1RJ69_CHICK Uncharacterized protein OS=Gallus gallus OX=9031 GN=HSPG2 PE=4 SV=2;tr|A0A3Q2UIW4|A0A3Q2UIW4_CHICK Uncharacterized protein OS=Gallus gallus OX=9031 GN=HSPG2 PE=4 SV=1;tr|A0A3Q2TRR9|A0A3Q2TRR9_CHICK Uncharacterized protein OS=	NaN	16.2362	2	395.04	0	12.362	13818000
A0A1D5P810	tr|A0A1D5P810|A0A1D5P810_CHICK ATP synthase peripheral stalk subunit OSCP OS=Gallus gallus OX=9031 GN=ATP5O PE=3 SV=2	NaN	27.3579	6	26.639	0	71.381	2236100000
A0A1D5P811;Q5ZLA7	tr|A0A1D5P811|A0A1D5P811_CHICK Dolichyl-diphosphooligosaccharide--protein glycotransferase OS=Gallus gallus OX=9031 GN=STT3A PE=3 SV=1;tr|Q5ZLA7|Q5ZLA7_CHICK Dolichyl-diphosphooligosaccharide--protein glycotransferase OS=Gallus gallus OX=9031 GN=STT3A PE=2	NaN	18.145	1	78.254	0.0023962	6.3873	7826200
A0A1D5P822;E1C1T1	tr|A0A1D5P822|A0A1D5P822_CHICK OCIA domain-containing protein OS=Gallus gallus OX=9031 GN=OCIAD2 PE=4 SV=1;tr|E1C1T1|E1C1T1_CHICK OCIA domain-containing protein OS=Gallus gallus OX=9031 GN=OCIAD2 PE=4 SV=1	NaN	23.7982	4	27.387	0	89.238	189630000
A0A1D5P832	tr|A0A1D5P832|A0A1D5P832_CHICK Uncharacterized protein OS=Gallus gallus OX=9031 GN=PUF60 PE=4 SV=2	23.5761	25.2631	7	38.696	0	143.06	738840000
A0A1D5P835;A0A3Q3AZU9;A0A3Q2U1C5	tr|A0A1D5P835|A0A1D5P835_CHICK DUF1681 domain-containing protein OS=Gallus gallus OX=9031 GN=NECAP1 PE=3 SV=1;tr|A0A3Q3AZU9|A0A3Q3AZU9_CHICK DUF1681 domain-containing protein OS=Gallus gallus OX=9031 GN=NECAP1 PE=3 SV=1;tr|A0A3Q2U1C5|A0A3Q2U1C5_CHICK DUF16	NaN	22.245	3	29.662	0	21.848	64619000
A0A1D5P888;A0A1L1RXL4	tr|A0A1D5P888|A0A1D5P888_CHICK Serine/threonine-protein phosphatase OS=Gallus gallus OX=9031 GN=PPP1CA PE=3 SV=2;tr|A0A1L1RXL4|A0A1L1RXL4_CHICK Protein-serine/threonine phosphatase OS=Gallus gallus OX=9031 GN=PPP1CA PE=4 SV=2	NaN	23.9494	3	39.101	0	51.192	323980000
A0A1D5P892;E1C270	tr|A0A1D5P892|A0A1D5P892_CHICK Uncharacterized protein OS=Gallus gallus OX=9031 GN=SRSF6 PE=4 SV=2;tr|E1C270|E1C270_CHICK RRM domain-containing protein OS=Gallus gallus OX=9031 GN=SRSF6 PE=4 SV=3	NaN	26.9067	3	40.521	0	75.066	1635500000
A0A1D5P893;A0A1D5PAH2;A0A1D5PD11;A0A3Q2UHA5;F1NPL2;A0A3Q2UHV4	tr|A0A1D5P893|A0A1D5P893_CHICK Uncharacterized protein OS=Gallus gallus OX=9031 GN=LOC426023 PE=4 SV=2;tr|A0A1D5PAH2|A0A1D5PAH2_CHICK Uncharacterized protein OS=Gallus gallus OX=9031 GN=LOC426023 PE=4 SV=2;tr|A0A1D5PD11|A0A1D5PD11_CHICK Uncharacterized pro	22.1131	26.5602	5	34.832	0	67.719	1759200000
F1NEW6;A0A1D5P899;A0A3Q3A2M4;A0A3Q2U367;A0A3Q2U5P3;A0A3Q2U0Y4	tr|F1NEW6|F1NEW6_CHICK Uncharacterized protein OS=Gallus gallus OX=9031 GN=MRPL19 PE=3 SV=4;tr|A0A1D5P899|A0A1D5P899_CHICK Uncharacterized protein OS=Gallus gallus OX=9031 GN=MRPL19 PE=3 SV=2;tr|A0A3Q3A2M4|A0A3Q3A2M4_CHICK Uncharacterized protein OS=Gallus	NaN	22.5648	2	29.67	0	12.588	68244000
A0A1D5P8A7	tr|A0A1D5P8A7|A0A1D5P8A7_CHICK Uncharacterized protein OS=Gallus gallus OX=9031 GN=EIF2B4 PE=3 SV=1	NaN	21.6342	3	36.716	0	22.726	58588000
A0A3Q2U8F1;A0A1D5P8B1;A0A3Q2U7Q5;A0A3Q2U8M0	tr|A0A3Q2U8F1|A0A3Q2U8F1_CHICK Uncharacterized protein OS=Gallus gallus OX=9031 GN=ARHGAP17 PE=4 SV=1;tr|A0A1D5P8B1|A0A1D5P8B1_CHICK Uncharacterized protein OS=Gallus gallus OX=9031 GN=ARHGAP17 PE=4 SV=2;tr|A0A3Q2U7Q5|A0A3Q2U7Q5_CHICK Uncharacterized prote	NaN	20.4494	2	91.216	0	14.306	44387000
A0A1L1RLA6;A0A1D5P8C5	tr|A0A1L1RLA6|A0A1L1RLA6_CHICK LRRcap domain-containing protein OS=Gallus gallus OX=9031 GN=PPP1R7 PE=4 SV=1;tr|A0A1D5P8C5|A0A1D5P8C5_CHICK LRRcap domain-containing protein OS=Gallus gallus OX=9031 GN=PPP1R7 PE=4 SV=1	NaN	19.3882	3	40.611	0	19.595	13723000
A0A1D5P8F9	tr|A0A1D5P8F9|A0A1D5P8F9_CHICK Saposin B-type domain-containing protein OS=Gallus gallus OX=9031 GN=CNPY2 PE=3 SV=2	NaN	24.2633	1	21.189	0	63.334	241640000
A0A1D5P8H6	tr|A0A1D5P8H6|A0A1D5P8H6_CHICK Uncharacterized protein OS=Gallus gallus OX=9031 GN=SPATS2 PE=3 SV=1	NaN	22.5594	6	57.545	0	45.084	179250000
A0A1D5P8H7	tr|A0A1D5P8H7|A0A1D5P8H7_CHICK Importin N-terminal domain-containing protein OS=Gallus gallus OX=9031 GN=XPO1 PE=3 SV=1	NaN	20.4877	6	123.16	0	40.36	77924000
A0A1D5P8I3	tr|A0A1D5P8I3|A0A1D5P8I3_CHICK Uncharacterized protein OS=Gallus gallus OX=9031 GN=SFPQ PE=4 SV=2	19.7824	24.7658	14	69.532	0	219.91	941730000
A0A1D5P8I7	tr|A0A1D5P8I7|A0A1D5P8I7_CHICK Isocitrate dehydrogenase [NADP] OS=Gallus gallus OX=9031 GN=IDH2 PE=3 SV=2	NaN	26.9176	17	50.482	0	286.79	3042500000
A0A3Q2TX57;A0A1D5P8M1;A0A1D5PGX3;F1NNX7;A0A3Q2UL65;A0A1D5PD49;A0A3Q2U103;A0A3Q2UH12;A0A3Q3AGB0;A0A1D5PIW9	tr|A0A3Q2TX57|A0A3Q2TX57_CHICK Uncharacterized protein OS=Gallus gallus OX=9031 GN=ANK3 PE=4 SV=1;tr|A0A1D5P8M1|A0A1D5P8M1_CHICK Uncharacterized protein OS=Gallus gallus OX=9031 GN=ANK3 PE=4 SV=1;tr|A0A1D5PGX3|A0A1D5PGX3_CHICK Uncharacterized protein OS=Ga	20.601	18.2963	3	208.66	0	17.809	187410000
A0A1D5P8M2	tr|A0A1D5P8M2|A0A1D5P8M2_CHICK Uncharacterized protein OS=Gallus gallus OX=9031 GN=PDDC1 PE=4 SV=2	NaN	21.6095	2	23.585	0	14.643	35196000
Q5ZKZ9;A0A1D5P8M7	sp|Q5ZKZ9|LMF2_CHICK Lipase maturation factor 2 OS=Gallus gallus OX=9031 GN=LMF2 PE=2 SV=2;tr|A0A1D5P8M7|A0A1D5P8M7_CHICK Lipase maturation factor OS=Gallus gallus OX=9031 GN=LMF2 PE=3 SV=1	NaN	19.6921	2	81.565	0	14.079	20329000
A0A1D5P8P5;F1NBJ8	tr|A0A1D5P8P5|A0A1D5P8P5_CHICK NTP_transferase domain-containing protein OS=Gallus gallus OX=9031 GN=EIF2B3 PE=4 SV=1;tr|F1NBJ8|F1NBJ8_CHICK NTP_transferase domain-containing protein OS=Gallus gallus OX=9031 GN=EIF2B3 PE=4 SV=4	NaN	21.8013	4	48.909	0	32.566	95021000
A0A3Q3A846;A0A3Q2UCS5;A0A3Q2TWS0;E1BRQ5;A0A3Q3AFS3;A0A1D5P8Q5	tr|A0A3Q3A846|A0A3Q3A846_CHICK Coiled-coil domain-containing protein 25 OS=Gallus gallus OX=9031 GN=CCDC25 PE=3 SV=1;tr|A0A3Q2UCS5|A0A3Q2UCS5_CHICK Coiled-coil domain-containing protein 25 OS=Gallus gallus OX=9031 GN=CCDC25 PE=3 SV=1;tr|A0A3Q2TWS0|A0A3Q2TW	NaN	25.9476	2	21.855	0	13.966	776550000
A0A1D5P8U8;Q0KKP5;A0A1L1RZ69	tr|A0A1D5P8U8|A0A1D5P8U8_CHICK Uncharacterized protein OS=Gallus gallus OX=9031 GN=CYP51A1 PE=3 SV=2;tr|Q0KKP5|Q0KKP5_CHICK Lanosterol 14alpha-demethylase OS=Gallus gallus OX=9031 GN=CYP51 PE=2 SV=1;tr|A0A1L1RZ69|A0A1L1RZ69_CHICK Uncharacterized protein OS	NaN	23.5657	8	52.65	0	54.42	297990000
A0A1D5P8V6;A0A1D5PCY0;H9L3J8;A0A1D5PVZ8	tr|A0A1D5P8V6|A0A1D5P8V6_CHICK UBA domain-containing protein OS=Gallus gallus OX=9031 GN=UBAP2L PE=4 SV=2;tr|A0A1D5PCY0|A0A1D5PCY0_CHICK UBA domain-containing protein OS=Gallus gallus OX=9031 GN=UBAP2L PE=4 SV=2;tr|H9L3J8|H9L3J8_CHICK UBA domain-containing	NaN	24.0128	9	113.92	0	155.2	490890000
A0A1D5P8Y3	tr|A0A1D5P8Y3|A0A1D5P8Y3_CHICK Non-specific serine/threonine protein kinase OS=Gallus gallus OX=9031 GN=PAK4 PE=4 SV=2	NaN	21.7124	5	71.586	0	40.619	109960000
E1BYF5;A0A1D5PJR8;A0A1D5PSL2;A0A1D5P8Z8	tr|E1BYF5|E1BYF5_CHICK Uncharacterized protein OS=Gallus gallus OX=9031 GN=AFDN PE=4 SV=4;tr|A0A1D5PJR8|A0A1D5PJR8_CHICK Uncharacterized protein OS=Gallus gallus OX=9031 GN=AFDN PE=4 SV=2;tr|A0A1D5PSL2|A0A1D5PSL2_CHICK Uncharacterized protein OS=Gallus gal	NaN	17.3067	1	206.33	0.00043422	7.4169	14753000
A0A1D5P908	tr|A0A1D5P908|A0A1D5P908_CHICK DUF3456 domain-containing protein OS=Gallus gallus OX=9031 GN=CNPY3 PE=4 SV=2	NaN	21.679	1	28.116	0.00043384	7.4075	50365000
A0A1D5P926;A0A1D5PI31;A0A3S5ZP84;A0A3Q2U6Z4	tr|A0A1D5P926|A0A1D5P926_CHICK ANK_REP_REGION domain-containing protein OS=Gallus gallus OX=9031 GN=GIT1 PE=4 SV=2;tr|A0A1D5PI31|A0A1D5PI31_CHICK Uncharacterized protein OS=Gallus gallus OX=9031 GN=GIT1 PE=4 SV=2;tr|A0A3S5ZP84|A0A3S5ZP84_CHICK Uncharacteri	NaN	18.4338	1	77.59	0	11.318	13810000
F1NK34;A0A1D5P943	tr|F1NK34|F1NK34_CHICK Uncharacterized protein OS=Gallus gallus OX=9031 GN=TJP2 PE=4 SV=2;tr|A0A1D5P943|A0A1D5P943_CHICK Uncharacterized protein OS=Gallus gallus OX=9031 GN=TJP2 PE=4 SV=1	NaN	17.7966	1	130.73	0	20.507	15027000
E1BZR1;F6SG96;A0A1D5P954	tr|E1BZR1|E1BZR1_CHICK Uncharacterized protein OS=Gallus gallus OX=9031 GN=HNRNPR PE=4 SV=3;tr|F6SG96|F6SG96_CHICK Uncharacterized protein OS=Gallus gallus OX=9031 GN=HNRNPR PE=4 SV=1;tr|A0A1D5P954|A0A1D5P954_CHICK Uncharacterized protein OS=Gallus gallus	NaN	23.591	8	71.974	0	119.63	467540000
F1NT40;A0A1D5P973	tr|F1NT40|F1NT40_CHICK Uncharacterized protein OS=Gallus gallus OX=9031 GN=SAR1A PE=3 SV=1;tr|A0A1D5P973|A0A1D5P973_CHICK Uncharacterized protein OS=Gallus gallus OX=9031 GN=SAR1B PE=3 SV=1	NaN	20.2333	1	22.391	0.00042882	7.2792	12326000
A0A1D5PXH4;A0A1D5P980;Q5ZIG5	tr|A0A1D5PXH4|A0A1D5PXH4_CHICK Glutamine--fructose-6-phosphate transaminase (isomerizing) OS=Gallus gallus OX=9031 GN=GFPT1 PE=4 SV=1;tr|A0A1D5P980|A0A1D5P980_CHICK Glutamine--fructose-6-phosphate transaminase (isomerizing) OS=Gallus gallus OX=9031 GN=GFPT	NaN	21.0113	2	76.777	0	61.74	88770000
A0A1D5P991;E1C6R7	tr|A0A1D5P991|A0A1D5P991_CHICK ANK_REP_REGION domain-containing protein OS=Gallus gallus OX=9031 GN=RAI14 PE=4 SV=1;tr|E1C6R7|E1C6R7_CHICK ANK_REP_REGION domain-containing protein OS=Gallus gallus OX=9031 GN=RAI14 PE=4 SV=3	NaN	17.3814	1	107.15	0.0004417	7.6492	10757000
A0A1D5P997;A0A1D5PI15	tr|A0A1D5P997|A0A1D5P997_CHICK AH domain-containing protein OS=Gallus gallus OX=9031 GN=ARFIP1 PE=4 SV=1;tr|A0A1D5PI15|A0A1D5PI15_CHICK AH domain-containing protein OS=Gallus gallus OX=9031 GN=ARFIP1 PE=4 SV=1	NaN	20.4664	3	44.682	0	18.299	31873000
Q5ZL34;F1NGU9;A0A1D5P9A5	sp|Q5ZL34|CPSF6_CHICK Cleavage and polyadenylation specificity factor subunit 6 OS=Gallus gallus OX=9031 GN=CPSF6 PE=2 SV=1;tr|F1NGU9|F1NGU9_CHICK Cleavage and polyadenylation specificity factor subunit 6 OS=Gallus gallus OX=9031 GN=CPSF6 PE=3 SV=2;tr|A0A1	NaN	24.278	6	59.359	0	124.51	366150000
A0A1D5P9D0;F1NW83	tr|A0A1D5P9D0|A0A1D5P9D0_CHICK Uncharacterized protein OS=Gallus gallus OX=9031 GN=MOB1A PE=4 SV=1;tr|F1NW83|F1NW83_CHICK MOB kinase activator 1B OS=Gallus gallus OX=9031 PE=4 SV=4	NaN	22.4564	3	25.077	0	21.528	63304000
A0A1D5P9D4	tr|A0A1D5P9D4|A0A1D5P9D4_CHICK Uncharacterized protein OS=Gallus gallus OX=9031 GN=IPO4 PE=4 SV=2	NaN	18.0422	1	50.59	0	12.913	7017900
A0A3Q2UDX5;A0A3Q2U3D6;A0A1D5P9E9;E1C2P9	tr|A0A3Q2UDX5|A0A3Q2UDX5_CHICK Kinectin OS=Gallus gallus OX=9031 GN=KTN1 PE=4 SV=1;tr|A0A3Q2U3D6|A0A3Q2U3D6_CHICK Kinectin OS=Gallus gallus OX=9031 GN=KTN1 PE=4 SV=1;tr|A0A1D5P9E9|A0A1D5P9E9_CHICK Kinectin OS=Gallus gallus OX=9031 GN=KTN1 PE=4 SV=2;tr|E1C2	NaN	21.7417	2	150.15	0	143.77	291060000
A0A1D5PSG8;A0A1D5P9G5;F1P189	tr|A0A1D5PSG8|A0A1D5PSG8_CHICK COMM domain-containing protein OS=Gallus gallus OX=9031 GN=COMMD10 PE=4 SV=2;tr|A0A1D5P9G5|A0A1D5P9G5_CHICK COMM domain-containing protein OS=Gallus gallus OX=9031 GN=COMMD10 PE=4 SV=1;tr|F1P189|F1P189_CHICK COMM domain-conta	NaN	22.0864	1	20.802	0	19.524	40080000
A0A3Q2TYK9;E1BWX3;A0A1D5P9H3	tr|A0A3Q2TYK9|A0A3Q2TYK9_CHICK Calcium uniporter protein OS=Gallus gallus OX=9031 GN=MCU PE=3 SV=1;tr|E1BWX3|E1BWX3_CHICK Calcium uniporter protein OS=Gallus gallus OX=9031 GN=MCU PE=3 SV=3;tr|A0A1D5P9H3|A0A1D5P9H3_CHICK Calcium uniporter protein OS=Gallus	NaN	21.8448	1	34.679	0.00044924	7.9859	45199000
A0A1D5P9I3;A0A1D5PLP8;A0A1D5PG36	tr|A0A1D5P9I3|A0A1D5P9I3_CHICK Isocitrate dehydrogenase [NAD] subunit, mitochondrial OS=Gallus gallus OX=9031 GN=IDH3B PE=3 SV=2;tr|A0A1D5PLP8|A0A1D5PLP8_CHICK Isocitrate dehydrogenase [NAD] subunit, mitochondrial OS=Gallus gallus OX=9031 GN=IDH3B PE=3 SV=	NaN	22.7248	3	40.489	0	21.412	117840000
A0A1D5P9L6;A0A1D5PFB1	tr|A0A1D5P9L6|A0A1D5P9L6_CHICK J domain-containing protein OS=Gallus gallus OX=9031 GN=DNAJC5 PE=4 SV=1;tr|A0A1D5PFB1|A0A1D5PFB1_CHICK J domain-containing protein OS=Gallus gallus OX=9031 GN=DNAJC5B PE=4 SV=1	NaN	21.2687	2	22.097	0	18.981	17685000
A0A1D5P9P4	tr|A0A1D5P9P4|A0A1D5P9P4_CHICK BTB domain-containing protein OS=Gallus gallus OX=9031 GN=KCTD12 PE=4 SV=2	NaN	17.3275	1	35.196	0.0004717	9.5642	2631500
A0A1D5P9Q2;A0A1D5PAY6;Q5ZJA2	tr|A0A1D5P9Q2|A0A1D5P9Q2_CHICK Anamorsin OS=Gallus gallus OX=9031 GN=CIAPIN1 PE=3 SV=1;tr|A0A1D5PAY6|A0A1D5PAY6_CHICK Anamorsin OS=Gallus gallus OX=9031 GN=CIAPIN1 PE=3 SV=2;sp|Q5ZJA2|CPIN1_CHICK Anamorsin OS=Gallus gallus OX=9031 GN=CIAPIN1 PE=2 SV=1	NaN	23.8524	6	32.961	0	66.456	257480000
A0A3Q2UK47;A0A3Q3AQV2;A0A1D5P9Q7;A0A3Q2UED1;A0A3Q3ANW1;A0A3Q2TXN7;Q5F3X8	tr|A0A3Q2UK47|A0A3Q2UK47_CHICK Protein transport protein Sec31A OS=Gallus gallus OX=9031 GN=SEC31A PE=3 SV=1;tr|A0A3Q3AQV2|A0A3Q3AQV2_CHICK Protein transport protein Sec31A OS=Gallus gallus OX=9031 GN=SEC31A PE=3 SV=1;tr|A0A1D5P9Q7|A0A1D5P9Q7_CHICK Protein	NaN	20.3975	4	125.15	0	28.302	70440000
A0A3Q3AW40;A0A1D5P9T4;A0A1D5PEF5;A0A3Q2U3E9	tr|A0A3Q3AW40|A0A3Q3AW40_CHICK TPR_REGION domain-containing protein OS=Gallus gallus OX=9031 GN=UNC45A PE=4 SV=1;tr|A0A1D5P9T4|A0A1D5P9T4_CHICK TPR_REGION domain-containing protein OS=Gallus gallus OX=9031 GN=UNC45A PE=4 SV=1;tr|A0A1D5PEF5|A0A1D5PEF5_CHICK	NaN	19.7121	4	94.301	0	34.9	45520000
A0A1D5P9U4;A0A1D5PYI1;A0A1D5PGQ5	tr|A0A1D5P9U4|A0A1D5P9U4_CHICK AdoHcyase_NAD domain-containing protein OS=Gallus gallus OX=9031 GN=AHCYL1 PE=3 SV=2;tr|A0A1D5PYI1|A0A1D5PYI1_CHICK AdoHcyase_NAD domain-containing protein OS=Gallus gallus OX=9031 GN=AHCYL1 PE=3 SV=3;tr|A0A1D5PGQ5|A0A1D5PGQ5	NaN	22.54	1	59.168	0	34.128	170750000
A0A1D5P9V0;P00548	tr|A0A1D5P9V0|A0A1D5P9V0_CHICK Pyruvate kinase OS=Gallus gallus OX=9031 GN=PKLR PE=3 SV=2;sp|P00548|KPYM_CHICK Pyruvate kinase PKM OS=Gallus gallus OX=9031 GN=PKM PE=2 SV=2	NaN	20.3072	1	60.378	0.00044092	7.6284	45408000
O73612;A0A1D5P9X0	sp|O73612|EFNB1_CHICK Ephrin-B1 OS=Gallus gallus OX=9031 GN=EFNB1 PE=2 SV=1;tr|A0A1D5P9X0|A0A1D5P9X0_CHICK Ephrin-B1 OS=Gallus gallus OX=9031 GN=EFNB1 PE=3 SV=1	NaN	20.2665	1	36.858	0.00044287	7.7059	23964000
Q5ZKG5;A0A1D5P9Z1	sp|Q5ZKG5|PPAC_CHICK Low molecular weight phosphotyrosine protein phosphatase OS=Gallus gallus OX=9031 GN=ACP1 PE=2 SV=3;tr|A0A1D5P9Z1|A0A1D5P9Z1_CHICK Low molecular weight cytosolic acid phosphatase OS=Gallus gallus OX=9031 GN=ACP1 PE=3 SV=1	NaN	23.1434	3	18.196	0	19.376	83388000
A0A1D5PA06	tr|A0A1D5PA06|A0A1D5PA06_CHICK Uncharacterized protein OS=Gallus gallus OX=9031 GN=RRP36 PE=3 SV=2	NaN	18.9432	1	23.903	0.0016201	6.5166	4032500
A0A1D5PA09	tr|A0A1D5PA09|A0A1D5PA09_CHICK V-type proton ATPase subunit C OS=Gallus gallus OX=9031 GN=ATP6V1C1 PE=3 SV=1	NaN	20.9225	2	44.14	0	20.748	53659000
A0A1D5PA36;A0A1D5NUK4	tr|A0A1D5PA36|A0A1D5PA36_CHICK Uncharacterized protein OS=Gallus gallus OX=9031 GN=CDK5RAP3 PE=3 SV=1;tr|A0A1D5NUK4|A0A1D5NUK4_CHICK Uncharacterized protein OS=Gallus gallus OX=9031 GN=CDK5RAP3 PE=3 SV=2	NaN	21.8692	5	57.131	0	38.839	99598000
A0A1D5PHR5;A0A3Q2UBG4;A0A1D5PA60	tr|A0A1D5PHR5|A0A1D5PHR5_CHICK Methionine--tRNA ligase, cytoplasmic OS=Gallus gallus OX=9031 GN=MARS PE=3 SV=2;tr|A0A3Q2UBG4|A0A3Q2UBG4_CHICK Methionine--tRNA ligase, cytoplasmic OS=Gallus gallus OX=9031 GN=MARS PE=3 SV=1;tr|A0A1D5PA60|A0A1D5PA60_CHICK Met	NaN	22.141	8	96.861	0	85.367	198860000
A0A1D5PAA8	tr|A0A1D5PAA8|A0A1D5PAA8_CHICK Uncharacterized protein OS=Gallus gallus OX=9031 GN=GYG1 PE=4 SV=1	NaN	18.9677	1	37.2	0	29.556	8202800
A0A1D5PAD0;A0A3Q2UMP0	tr|A0A1D5PAD0|A0A1D5PAD0_CHICK Uncharacterized protein OS=Gallus gallus OX=9031 GN=LOC420562 PE=3 SV=2;tr|A0A3Q2UMP0|A0A3Q2UMP0_CHICK Uncharacterized protein OS=Gallus gallus OX=9031 GN=LOC420562 PE=3 SV=1	NaN	18.3277	1	41.959	0.00083264	6.852	6908900
E1C4P2;A0A1D5PAD1;A0A1L1RN79;E1C0L3;A0A1D5PQ86;A0A1D5PY45	tr|E1C4P2|E1C4P2_CHICK Uncharacterized protein OS=Gallus gallus OX=9031 GN=MTA1 PE=4 SV=3;tr|A0A1D5PAD1|A0A1D5PAD1_CHICK Uncharacterized protein OS=Gallus gallus OX=9031 GN=MTA3 PE=4 SV=1;tr|A0A1L1RN79|A0A1L1RN79_CHICK Uncharacterized protein OS=Gallus gal	NaN	16.4046	1	71.144	0.0023419	6.1657	3296500
A0A1D5PAE0	tr|A0A1D5PAE0|A0A1D5PAE0_CHICK ZP domain-containing protein OS=Gallus gallus OX=9031 GN=ENG PE=4 SV=2	NaN	19.5616	1	78.278	0.00082169	6.7093	24761000
A0A1L1RR94;O13035;E1BSP1;A0A1D5PAE3	tr|A0A1L1RR94|A0A1L1RR94_CHICK Prosaposin OS=Gallus gallus OX=9031 GN=PSAP PE=4 SV=2;sp|O13035|SAP_CHICK Prosaposin OS=Gallus gallus OX=9031 GN=PSAP PE=1 SV=1;tr|E1BSP1|E1BSP1_CHICK Prosaposin OS=Gallus gallus OX=9031 GN=PSAP PE=4 SV=3;tr|A0A1D5PAE3|A0A1D5	NaN	19.838	1	57.16	0.00082338	6.7234	28117000
A0A1D5PAE4	tr|A0A1D5PAE4|A0A1D5PAE4_CHICK PWWP domain-containing protein OS=Gallus gallus OX=9031 GN=HDGF PE=4 SV=1	NaN	21.9833	2	26.248	0	15.192	62191000
A0A1D5PAE7	tr|A0A1D5PAE7|A0A1D5PAE7_CHICK Elongin-A OS=Gallus gallus OX=9031 GN=TCEB3 PE=4 SV=1	NaN	18.2543	1	87.916	0.0004771	10.441	10006000
A0A1D5PAE8	tr|A0A1D5PAE8|A0A1D5PAE8_CHICK Leukotriene A(4) hydrolase OS=Gallus gallus OX=9031 GN=LTA4H PE=3 SV=1	NaN	17.7787	2	76.639	0	10.968	8320200
F1NH92;Q5ZK55;A0A1D5PAF6	tr|F1NH92|F1NH92_CHICK MICOS complex subunit OS=Gallus gallus OX=9031 GN=APOOL PE=3 SV=2;sp|Q5ZK55|MIC27_CHICK MICOS complex subunit MIC27 OS=Gallus gallus OX=9031 GN=APOOL PE=2 SV=1;tr|A0A1D5PAF6|A0A1D5PAF6_CHICK MICOS complex subunit OS=Gallus gallus OX=	NaN	20.5957	2	29.693	0	46.941	23769000
E1BW97;A0A1D5PAF9	tr|E1BW97|E1BW97_CHICK AP-3 complex subunit beta OS=Gallus gallus OX=9031 GN=AP3B1 PE=3 SV=3;tr|A0A1D5PAF9|A0A1D5PAF9_CHICK AP-3 complex subunit beta OS=Gallus gallus OX=9031 GN=AP3B1 PE=3 SV=1	NaN	19.8246	3	122.23	0	20.495	54783000
A0A1D5PF55;A0A1D5PU95;A0A1D5PAM6	tr|A0A1D5PF55|A0A1D5PF55_CHICK Uncharacterized protein OS=Gallus gallus OX=9031 GN=STAU2 PE=4 SV=2;tr|A0A1D5PU95|A0A1D5PU95_CHICK Uncharacterized protein OS=Gallus gallus OX=9031 GN=STAU2 PE=4 SV=2;tr|A0A1D5PAM6|A0A1D5PAM6_CHICK Uncharacterized protein OS=	NaN	23.3235	9	66.934	0	120.92	356910000
A0A1D5PEZ5;A0A1D5PAN9	tr|A0A1D5PEZ5|A0A1D5PEZ5_CHICK Nucleoporin NDC1 OS=Gallus gallus OX=9031 GN=NDC1 PE=3 SV=1;tr|A0A1D5PAN9|A0A1D5PAN9_CHICK Nucleoporin NDC1 OS=Gallus gallus OX=9031 GN=NDC1 PE=3 SV=1	NaN	18.0161	1	82.942	0.0081301	5.7269	7952800
A0A1D5PAP2	tr|A0A1D5PAP2|A0A1D5PAP2_CHICK Uncharacterized protein OS=Gallus gallus OX=9031 GN=RRP1B PE=3 SV=2	NaN	22.9809	8	84.456	0	138.01	355970000
A0A1D5PAR5;A0A1D5PA34;P09645	tr|A0A1D5PAR5|A0A1D5PAR5_CHICK Tubulin alpha chain OS=Gallus gallus OX=9031 GN=TUBA3E PE=3 SV=1;tr|A0A1D5PA34|A0A1D5PA34_CHICK Tubulin alpha chain OS=Gallus gallus OX=9031 GN=TUBA3E PE=3 SV=1;sp|P09645|TBA8_CHICK Tubulin alpha-8 chain (Fragment) OS=Gallus	20.93	23.544	2	49.956	0	18.549	298810000
A0A1D5PAU7	tr|A0A1D5PAU7|A0A1D5PAU7_CHICK N-acyl-L-amino-acid amidohydrolase OS=Gallus gallus OX=9031 GN=ACY1 PE=3 SV=1	NaN	22.6143	4	45.909	0	57.516	160520000
E1BUV1;A0A1D5PB13;A0A3Q2TY40	tr|E1BUV1|E1BUV1_CHICK Ribosomal RNA-processing protein 43 OS=Gallus gallus OX=9031 GN=EXOSC8 PE=3 SV=4;tr|A0A1D5PB13|A0A1D5PB13_CHICK Ribosomal RNA-processing protein 43 OS=Gallus gallus OX=9031 GN=EXOSC8 PE=3 SV=2;tr|A0A3Q2TY40|A0A3Q2TY40_CHICK Ribosomal	NaN	21.8642	2	30.391	0	19.471	41993000
A0A1L1RN94;Q90Y35;A0A1D5PB45	tr|A0A1L1RN94|A0A1L1RN94_CHICK Zinc finger protein 622 OS=Gallus gallus OX=9031 GN=ZNF622 PE=4 SV=2;sp|Q90Y35|ZN622_CHICK Zinc finger protein 622 OS=Gallus gallus OX=9031 GN=ZNF622 PE=2 SV=1;tr|A0A1D5PB45|A0A1D5PB45_CHICK Zinc finger protein 622 OS=Gallus	NaN	21.4766	3	41.531	0	19.1	49610000
F1NDS5;A0A1L1RWG0;A0A1D5PB69	tr|F1NDS5|F1NDS5_CHICK Uncharacterized protein OS=Gallus gallus OX=9031 GN=PFDN1 PE=3 SV=2;tr|A0A1L1RWG0|A0A1L1RWG0_CHICK Uncharacterized protein OS=Gallus gallus OX=9031 GN=PFDN1 PE=3 SV=2;tr|A0A1D5PB69|A0A1D5PB69_CHICK Uncharacterized protein OS=Gallus g	NaN	22.2063	2	14.222	0	16.019	43551000
A0A1D5PB91	tr|A0A1D5PB91|A0A1D5PB91_CHICK Thioredoxin domain-containing protein OS=Gallus gallus OX=9031 GN=TXNDC9 PE=4 SV=1	NaN	23.4458	2	26.354	0	27.619	148540000
A0A1D5PBA6;E1BQQ5	tr|A0A1D5PBA6|A0A1D5PBA6_CHICK Uncharacterized protein OS=Gallus gallus OX=9031 GN=DCTN4 PE=4 SV=2;tr|E1BQQ5|E1BQQ5_CHICK Uncharacterized protein OS=Gallus gallus OX=9031 GN=DCTN4 PE=4 SV=4	NaN	22.8977	8	52.43	0	61.802	179730000
A0A1D5PBC6;A0A1L1RYR6;A0A3Q2U945	tr|A0A1D5PBC6|A0A1D5PBC6_CHICK Asparagine--tRNA ligase OS=Gallus gallus OX=9031 GN=NARS PE=3 SV=1;tr|A0A1L1RYR6|A0A1L1RYR6_CHICK Asparagine--tRNA ligase OS=Gallus gallus OX=9031 GN=NARS PE=3 SV=2;tr|A0A3Q2U945|A0A3Q2U945_CHICK Asparagine--tRNA ligase OS=Ga	NaN	22.3905	7	64.115	0	71.774	131960000
A0A1D5PBD8;A0A3Q2UDG1	tr|A0A1D5PBD8|A0A1D5PBD8_CHICK Nuclear pore complex protein Nup96 OS=Gallus gallus OX=9031 GN=NUP98 PE=3 SV=2;tr|A0A3Q2UDG1|A0A3Q2UDG1_CHICK Nuclear pore complex protein Nup96 OS=Gallus gallus OX=9031 GN=NUP98 PE=3 SV=1	NaN	20.5871	7	192.9	0	52.136	122870000
A0A1D5PBF6	tr|A0A1D5PBF6|A0A1D5PBF6_CHICK Uncharacterized protein OS=Gallus gallus OX=9031 GN=FLII PE=4 SV=2	16.8708	16.0967	1	140.64	0	15.492	11965000
H9L0E7;A0A1D5PBJ5	tr|H9L0E7|H9L0E7_CHICK TPR_REGION domain-containing protein OS=Gallus gallus OX=9031 GN=SGTA PE=3 SV=3;tr|A0A1D5PBJ5|A0A1D5PBJ5_CHICK TPR_REGION domain-containing protein OS=Gallus gallus OX=9031 GN=SGTA PE=3 SV=3	NaN	25.0271	5	32.265	0	125.22	410300000
A0A1D5PY04;A0A1D5PBL3	tr|A0A1D5PY04|A0A1D5PY04_CHICK Uncharacterized protein OS=Gallus gallus OX=9031 GN=CLIP2 PE=4 SV=2;tr|A0A1D5PBL3|A0A1D5PBL3_CHICK Uncharacterized protein OS=Gallus gallus OX=9031 GN=CLIP2 PE=4 SV=2	NaN	19.5915	3	111.87	0	21.607	46611000
A0A1D5PBN7;Q5ZKT8	tr|A0A1D5PBN7|A0A1D5PBN7_CHICK 39S ribosomal protein L15, mitochondrial OS=Gallus gallus OX=9031 GN=MRPL15 PE=3 SV=2;sp|Q5ZKT8|RM15_CHICK 39S ribosomal protein L15, mitochondrial OS=Gallus gallus OX=9031 GN=MRPL15 PE=2 SV=1	NaN	23.1177	6	33.586	0	58.887	172930000
A0A1D5PBN9	tr|A0A1D5PBN9|A0A1D5PBN9_CHICK Uncharacterized protein OS=Gallus gallus OX=9031 GN=PURA PE=3 SV=2	NaN	22.6157	2	34.388	0	36.625	51416000
A0A1D5PSB3;E1C541;A0A1D5PBQ1	tr|A0A1D5PSB3|A0A1D5PSB3_CHICK Miff domain-containing protein OS=Gallus gallus OX=9031 GN=MFF PE=3 SV=2;tr|E1C541|E1C541_CHICK Uncharacterized protein OS=Gallus gallus OX=9031 GN=MFF PE=3 SV=4;tr|A0A1D5PBQ1|A0A1D5PBQ1_CHICK Mitochondrial fission factor OS=	NaN	22.7516	1	10.128	0	17.687	28247000
A0A1D5PDC4;A0A1D5PRK4;A0A1D5PBT2;F1N851;A0A1D5PZJ5	tr|A0A1D5PDC4|A0A1D5PDC4_CHICK Uncharacterized protein OS=Gallus gallus OX=9031 GN=ENTPD1 PE=3 SV=2;tr|A0A1D5PRK4|A0A1D5PRK4_CHICK Uncharacterized protein OS=Gallus gallus OX=9031 GN=ENTPD1 PE=3 SV=2;tr|A0A1D5PBT2|A0A1D5PBT2_CHICK Uncharacterized protein O	NaN	20.7227	1	54.259	0.0031032	6.1012	31147000
A0A1D5PBV0;A0A1D5PM89	tr|A0A1D5PBV0|A0A1D5PBV0_CHICK Protein CASC3 OS=Gallus gallus OX=9031 GN=CASC3 PE=3 SV=2;tr|A0A1D5PM89|A0A1D5PM89_CHICK Protein CASC3 OS=Gallus gallus OX=9031 GN=CASC3 PE=3 SV=2	NaN	20.107	1	72.535	0	11.986	27104000
A0A1D5PBW1	tr|A0A1D5PBW1|A0A1D5PBW1_CHICK NudC domain-containing protein 1 OS=Gallus gallus OX=9031 GN=NUDCD1 PE=4 SV=2	NaN	20.5697	2	83.435	0	16.196	54472000
A0A3Q2U2C4;A0A3Q3AW20;A0A1D5PBX2	tr|A0A3Q2U2C4|A0A3Q2U2C4_CHICK MBD domain-containing protein OS=Gallus gallus OX=9031 GN=MBD3 PE=4 SV=1;tr|A0A3Q3AW20|A0A3Q3AW20_CHICK MBD domain-containing protein OS=Gallus gallus OX=9031 GN=MBD3 PE=4 SV=1;tr|A0A1D5PBX2|A0A1D5PBX2_CHICK MBD domain-contai	NaN	22.2601	2	33.217	0	30.738	70319000
A0A1D5PBY3;A0A1D5PNR4	tr|A0A1D5PBY3|A0A1D5PBY3_CHICK Thioredoxin domain-containing protein OS=Gallus gallus OX=9031 GN=PRDX3 PE=4 SV=2;tr|A0A1D5PNR4|A0A1D5PNR4_CHICK Thioredoxin domain-containing protein OS=Gallus gallus OX=9031 GN=PRDX3 PE=4 SV=2	NaN	24.4862	4	25.761	0	72.447	352510000
F1NRQ2;A0A1D5PBY7	tr|F1NRQ2|F1NRQ2_CHICK Protein NDRG3 OS=Gallus gallus OX=9031 GN=LOC107057310 PE=3 SV=3;tr|A0A1D5PBY7|A0A1D5PBY7_CHICK Protein NDRG3 OS=Gallus gallus OX=9031 GN=LOC107057310 PE=3 SV=2	NaN	18.6724	2	41.071	0	21.566	5431300
A0A1D5PC23	tr|A0A1D5PC23|A0A1D5PC23_CHICK Transaldolase OS=Gallus gallus OX=9031 GN=TALDO1 PE=3 SV=1	NaN	24.9877	7	37.582	0	57.806	632120000
A0A1D5PC35	tr|A0A1D5PC35|A0A1D5PC35_CHICK Uncharacterized protein OS=Gallus gallus OX=9031 GN=LSM3 PE=4 SV=2	NaN	23.7867	1	11.285	0	36.421	57885000
A0A1D5PC51;E1C409	tr|A0A1D5PC51|A0A1D5PC51_CHICK Ceramide transfer protein OS=Gallus gallus OX=9031 GN=COL4A3BP PE=4 SV=1;tr|E1C409|E1C409_CHICK Ceramide transfer protein OS=Gallus gallus OX=9031 GN=COL4A3BP PE=4 SV=4	NaN	18.9876	1	73.332	0.003108	6.1256	17153000
A0A1D5PC75	tr|A0A1D5PC75|A0A1D5PC75_CHICK FA_desaturase domain-containing protein OS=Gallus gallus OX=9031 GN=SCD PE=3 SV=2	NaN	21.1816	1	65.033	0.00044823	7.9098	57084000
A0A1D5PC90	tr|A0A1D5PC90|A0A1D5PC90_CHICK Histidine--tRNA ligase OS=Gallus gallus OX=9031 GN=HARS PE=3 SV=1	NaN	23.786	9	56.684	0	113.29	404980000
A0A1D5PC99;F1N9U8	tr|A0A1D5PC99|A0A1D5PC99_CHICK Electron transfer flavoprotein subunit alpha OS=Gallus gallus OX=9031 GN=ETFA PE=3 SV=1;tr|F1N9U8|F1N9U8_CHICK Electron transfer flavoprotein subunit alpha OS=Gallus gallus OX=9031 GN=ETFA PE=3 SV=4	NaN	26.0867	8	34.217	0	94.309	1354100000
Q5ZHQ3;A0A1L1RV80;A0A1D5PCD1	tr|Q5ZHQ3|Q5ZHQ3_CHICK Flotillin OS=Gallus gallus OX=9031 GN=FLOT2 PE=2 SV=1;tr|A0A1L1RV80|A0A1L1RV80_CHICK Flotillin OS=Gallus gallus OX=9031 GN=FLOT2 PE=3 SV=2;tr|A0A1D5PCD1|A0A1D5PCD1_CHICK Flotillin OS=Gallus gallus OX=9031 GN=FLOT2 PE=3 SV=2	NaN	19.599	1	36.204	0.0057186	5.971	16677000
A0A3Q2U530;A0A1D5PCE8;A0A3Q2U8E8;A0A3Q2TVX2	tr|A0A3Q2U530|A0A3Q2U530_CHICK Uncharacterized protein OS=Gallus gallus OX=9031 GN=MAP7D3 PE=3 SV=1;tr|A0A1D5PCE8|A0A1D5PCE8_CHICK Uncharacterized protein OS=Gallus gallus OX=9031 GN=MAP7D3 PE=3 SV=2;tr|A0A3Q2U8E8|A0A3Q2U8E8_CHICK Uncharacterized protein O	NaN	20.4124	3	94.608	0	65.251	65587000
A0A1D5PCG3;A0A3Q3AUY5	tr|A0A1D5PCG3|A0A1D5PCG3_CHICK Secretory carrier-associated membrane protein OS=Gallus gallus OX=9031 GN=SCAMP3 PE=3 SV=2;tr|A0A3Q3AUY5|A0A3Q3AUY5_CHICK Secretory carrier-associated membrane protein OS=Gallus gallus OX=9031 GN=SCAMP3 PE=3 SV=1	NaN	23.1633	5	35.49	0	194.98	112730000
E1BZE5;A0A1D5PCJ6	tr|E1BZE5|E1BZE5_CHICK RRM domain-containing protein OS=Gallus gallus OX=9031 GN=RBM33 PE=4 SV=4;tr|A0A1D5PCJ6|A0A1D5PCJ6_CHICK RRM domain-containing protein OS=Gallus gallus OX=9031 GN=RBM33 PE=4 SV=2	NaN	19.248	1	125.18	0.0024	6.3965	26151000
A0A3Q2TS92;A0A1D5PCK3;A0A3Q3A8X7	tr|A0A3Q2TS92|A0A3Q2TS92_CHICK ASPSCR1 tether for SLC2A4, UBX domain containing OS=Gallus gallus OX=9031 PE=4 SV=1;tr|A0A1D5PCK3|A0A1D5PCK3_CHICK ASPSCR1 tether for SLC2A4, UBX domain containing OS=Gallus gallus OX=9031 PE=4 SV=2;tr|A0A3Q3A8X7|A0A3Q3A8X7_C	NaN	20.008	2	64.105	0	40.103	27416000
F1NVM8;A0A1D5PCP4	tr|F1NVM8|F1NVM8_CHICK Uncharacterized protein OS=Gallus gallus OX=9031 GN=NR6A1 PE=3 SV=4;tr|A0A1D5PCP4|A0A1D5PCP4_CHICK Uncharacterized protein OS=Gallus gallus OX=9031 GN=NR6A1 PE=3 SV=2	NaN	21.6117	2	50.801	0	13.574	70499000
A0A1D5PTE2;A0A1D5PGQ9;A0A1D5PFB8;A0A1D5PCQ7;A0A1D5PHJ8;Q9PTG6	tr|A0A1D5PTE2|A0A1D5PTE2_CHICK Dynactin subunit 2 OS=Gallus gallus OX=9031 GN=DCTN2 PE=3 SV=2;tr|A0A1D5PGQ9|A0A1D5PGQ9_CHICK Dynactin subunit 2 OS=Gallus gallus OX=9031 GN=DCTN2 PE=3 SV=1;tr|A0A1D5PFB8|A0A1D5PFB8_CHICK Dynactin subunit 2 OS=Gallus gallus O	NaN	24.8093	12	44.579	0	235.97	646780000
A0A1D5PCR1	tr|A0A1D5PCR1|A0A1D5PCR1_CHICK Uncharacterized protein OS=Gallus gallus OX=9031 GN=HIP1R PE=3 SV=1	NaN	18.3209	2	110.26	0	11.906	18009000
Q5ZI60;A0A1L1RWS8;A0A1D5PCT4	tr|Q5ZI60|Q5ZI60_CHICK Coronin OS=Gallus gallus OX=9031 GN=CORO1C PE=2 SV=1;tr|A0A1L1RWS8|A0A1L1RWS8_CHICK Coronin OS=Gallus gallus OX=9031 GN=CORO1C PE=3 SV=1;tr|A0A1D5PCT4|A0A1D5PCT4_CHICK Coronin OS=Gallus gallus OX=9031 GN=CORO1C PE=3 SV=1	21.7141	23.7449	5	53.207	0	51.231	332470000
A0A1D5PCU1;F1NJ10	tr|A0A1D5PCU1|A0A1D5PCU1_CHICK Uncharacterized protein OS=Gallus gallus OX=9031 GN=SLC25A5 PE=3 SV=2;tr|F1NJ10|F1NJ10_CHICK Uncharacterized protein OS=Gallus gallus OX=9031 GN=SLC25A5 PE=3 SV=4	NaN	22.1817	2	32.864	0	13.376	95148000
A0A1D5PCU3	tr|A0A1D5PCU3|A0A1D5PCU3_CHICK RBR-type E3 ubiquitin transferase OS=Gallus gallus OX=9031 GN=ARIH2 PE=2 SV=2	NaN	19.4527	1	57.318	0.00084495	7.0643	17938000
Q5ZHN1;A0A1D5PCX2	sp|Q5ZHN1|CHM2A_CHICK Charged multivesicular body protein 2a OS=Gallus gallus OX=9031 GN=CHMP2A PE=2 SV=1;tr|A0A1D5PCX2|A0A1D5PCX2_CHICK Charged multivesicular body protein 2a OS=Gallus gallus OX=9031 GN=CHMP2A PE=3 SV=2	NaN	22.2914	3	24.732	0	24.484	46197000
A0A1D5PD25;Q49B65	tr|A0A1D5PD25|A0A1D5PD25_CHICK Uncharacterized protein OS=Gallus gallus OX=9031 GN=EFHD2 PE=4 SV=2;tr|Q49B65|Q49B65_CHICK EF hand-containing protein 1 OS=Gallus gallus OX=9031 GN=EFHD1 PE=2 SV=1	NaN	20.7	1	24.563	0.0023438	6.1736	20441000
A0A1D5PD29;F1NDS2;A0A1L1S0D7	tr|A0A1D5PD29|A0A1D5PD29_CHICK Uncharacterized protein OS=Gallus gallus OX=9031 GN=MRPL39 PE=4 SV=1;tr|F1NDS2|F1NDS2_CHICK Uncharacterized protein OS=Gallus gallus OX=9031 GN=MRPL39 PE=4 SV=3;tr|A0A1L1S0D7|A0A1L1S0D7_CHICK Uncharacterized protein OS=Gallus	NaN	23.7135	5	40.059	0	44.237	302600000
A0A1D5PD32	tr|A0A1D5PD32|A0A1D5PD32_CHICK RNA helicase OS=Gallus gallus OX=9031 GN=DDX17 PE=3 SV=1	NaN	25.0803	13	73.041	0	166.09	1099700000
Q90694;A0A1D5PD33;A0A3Q2TUW7	sp|Q90694|CDC42_CHICK Cell division control protein 42 homolog OS=Gallus gallus OX=9031 GN=CDC42 PE=2 SV=1;tr|A0A1D5PD33|A0A1D5PD33_CHICK Cell division control protein 42 homolog OS=Gallus gallus OX=9031 GN=CDC42 PE=3 SV=1;tr|A0A3Q2TUW7|A0A3Q2TUW7_CHICK Ce	NaN	22.8309	1	21.272	0.00047619	10.276	67149000
A0A1D5PD41	tr|A0A1D5PD41|A0A1D5PD41_CHICK WD_REPEATS_REGION domain-containing protein OS=Gallus gallus OX=9031 GN=WDR77 PE=4 SV=1	NaN	24.5659	6	38.49	0	66.594	273190000
A0A1D5PD53;E1C1N7;A0A3Q3A7M9;A0A1D5NVG6	tr|A0A1D5PD53|A0A1D5PD53_CHICK Uncharacterized protein OS=Gallus gallus OX=9031 GN=MIA2 PE=4 SV=1;tr|E1C1N7|E1C1N7_CHICK SH3 domain-containing protein OS=Gallus gallus OX=9031 GN=MIA2 PE=4 SV=4;tr|A0A3Q3A7M9|A0A3Q3A7M9_CHICK SH3 domain-containing protein O	NaN	18.1758	2	107.16	0	13.608	15694000
F1P2G2;A0A1D5PD59;A0A3Q3B2A2	tr|F1P2G2|F1P2G2_CHICK Uncharacterized protein OS=Gallus gallus OX=9031 GN=EPS15L1 PE=4 SV=4;tr|A0A1D5PD59|A0A1D5PD59_CHICK Uncharacterized protein OS=Gallus gallus OX=9031 GN=EPS15L1 PE=4 SV=2;tr|A0A3Q3B2A2|A0A3Q3B2A2_CHICK Uncharacterized protein OS=Gall	NaN	17.2299	1	101.37	0.00084175	7.0356	7993000
A0A1D5PD65	tr|A0A1D5PD65|A0A1D5PD65_CHICK Phosphatidylinositol-4,5-bisphosphate 4-phosphatase OS=Gallus gallus OX=9031 GN=TMEM55A PE=4 SV=1	NaN	20.5967	2	27.938	0	22.693	22200000
A0A1L1RTA1;A0A1D5PD86	tr|A0A1L1RTA1|A0A1L1RTA1_CHICK Uncharacterized protein OS=Gallus gallus OX=9031 GN=DECR1 PE=4 SV=2;tr|A0A1D5PD86|A0A1D5PD86_CHICK Uncharacterized protein OS=Gallus gallus OX=9031 GN=DECR1 PE=4 SV=2	NaN	24.3233	6	33.321	0	62.928	377850000
A0A1D5PD87;A0A3Q2TY03;A0A3Q2UHY3;A0A1D5PSR0	tr|A0A1D5PD87|A0A1D5PD87_CHICK WD_REPEATS_REGION domain-containing protein OS=Gallus gallus OX=9031 GN=STRN3 PE=3 SV=2;tr|A0A3Q2TY03|A0A3Q2TY03_CHICK WD_REPEATS_REGION domain-containing protein OS=Gallus gallus OX=9031 GN=STRN3 PE=3 SV=1;tr|A0A3Q2UHY3|A0A3	NaN	22.4227	3	79.364	0	85.116	140550000
A0A1D5PDA1	tr|A0A1D5PDA1|A0A1D5PDA1_CHICK Uncharacterized protein OS=Gallus gallus OX=9031 GN=ECH1 PE=4 SV=2	NaN	22.1146	6	56.388	0	100.71	140770000
A0A1D5PDC7;Q5F3C6;A0A1L1RVT0;A0A1L1RTN3;A0A3Q2U6X1;A0A3Q2U021	tr|A0A1D5PDC7|A0A1D5PDC7_CHICK Serine/threonine protein phosphatase 2A regulatory subunit OS=Gallus gallus OX=9031 GN=PPP2R5D PE=3 SV=2;tr|Q5F3C6|Q5F3C6_CHICK Serine/threonine protein phosphatase 2A regulatory subunit OS=Gallus gallus OX=9031 GN=PPP2R5C PE	NaN	20.5365	2	56.217	0	17.816	38022000
A0A1D5PDE6;P16527	tr|A0A1D5PDE6|A0A1D5PDE6_CHICK Myristoylated alanine-rich C-kinase substrate OS=Gallus gallus OX=9031 GN=MARCKS PE=3 SV=1;sp|P16527|MARCS_CHICK Myristoylated alanine-rich C-kinase substrate OS=Gallus gallus OX=9031 GN=MARCKS PE=1 SV=2	NaN	26.551	7	27.643	0	320.29	1769800000
A0A1D5PDE7	tr|A0A1D5PDE7|A0A1D5PDE7_CHICK Peptidyl-prolyl cis-trans isomerase E OS=Gallus gallus OX=9031 GN=PPIE PE=3 SV=1	18.6169	24.5261	4	35.5	0	89.773	417550000
A0A1D5PDG4;A0A3Q2TWD9	tr|A0A1D5PDG4|A0A1D5PDG4_CHICK Uncharacterized protein OS=Gallus gallus OX=9031 GN=GNAS PE=3 SV=2;tr|A0A3Q2TWD9|A0A3Q2TWD9_CHICK GNAS complex locus OS=Gallus gallus OX=9031 GN=GNAS PE=2 SV=1	NaN	21.5838	2	44.382	0	14.851	59722000
A0A1D5PDJ8	tr|A0A1D5PDJ8|A0A1D5PDJ8_CHICK Corrinoid adenosyltransferase OS=Gallus gallus OX=9031 PE=3 SV=2	NaN	21.785	2	24.242	0	11.15	43363000
A0A1D5PDK5	tr|A0A1D5PDK5|A0A1D5PDK5_CHICK Calponin-homology (CH) domain-containing protein OS=Gallus gallus OX=9031 GN=IGSF9 PE=4 SV=3	NaN	25.3292	7	20.599	0	114.04	590190000
A0A3Q2U9M5;A0A1D5PDN2	tr|A0A3Q2U9M5|A0A3Q2U9M5_CHICK Evolutionarily conserved signaling intermediate in Toll pathway, mitochondrial OS=Gallus gallus OX=9031 GN=ECSIT PE=3 SV=1;tr|A0A1D5PDN2|A0A1D5PDN2_CHICK Evolutionarily conserved signaling intermediate in Toll pathway, mitoch	NaN	21.5903	3	41.621	0	24.417	66303000
A0A1D5PDR0	tr|A0A1D5PDR0|A0A1D5PDR0_CHICK Terpene cyclase/mutase family member OS=Gallus gallus OX=9031 GN=LSS PE=3 SV=1	NaN	23.5965	11	85.351	0	119.88	469300000
A0A1D5PDV6	tr|A0A1D5PDV6|A0A1D5PDV6_CHICK Uncharacterized protein OS=Gallus gallus OX=9031 GN=RPS19 PE=3 SV=2	NaN	29.1175	11	16.074	0	209.08	5824300000
A0A1D5PDZ1	tr|A0A1D5PDZ1|A0A1D5PDZ1_CHICK Uncharacterized protein OS=Gallus gallus OX=9031 GN=FAM32A PE=3 SV=1	NaN	20.7589	1	12.973	0.0023971	6.3901	8872100
A0A1D5PDZ7;A0A3Q3A8C7;A0A3Q3AG64	tr|A0A1D5PDZ7|A0A1D5PDZ7_CHICK RNA helicase OS=Gallus gallus OX=9031 GN=LOC423693 PE=3 SV=2;tr|A0A3Q3A8C7|A0A3Q3A8C7_CHICK RNA helicase OS=Gallus gallus OX=9031 GN=LOC423693 PE=3 SV=1;tr|A0A3Q3AG64|A0A3Q3AG64_CHICK RNA helicase OS=Gallus gallus OX=9031 GN=	NaN	23.4409	10	74.008	0	140.07	444100000
A0A1D5PE10;A0A1D5PI96;E1C5D0	tr|A0A1D5PE10|A0A1D5PE10_CHICK C-type lectin domain-containing protein OS=Gallus gallus OX=9031 GN=CHODL PE=4 SV=1;tr|A0A1D5PI96|A0A1D5PI96_CHICK C-type lectin domain-containing protein OS=Gallus gallus OX=9031 GN=CHODL PE=4 SV=2;tr|E1C5D0|E1C5D0_CHICK C-t	NaN	23.1402	1	31.372	0.0053578	5.9997	83202000
A0A1D5PE14	tr|A0A1D5PE14|A0A1D5PE14_CHICK J domain-containing protein OS=Gallus gallus OX=9031 GN=DNAJC17 PE=4 SV=1	NaN	21.0058	2	35.326	0	60.293	40007000
A0A1D5PE41	tr|A0A1D5PE41|A0A1D5PE41_CHICK Complex I-23kD OS=Gallus gallus OX=9031 GN=NDUFS8 PE=3 SV=1	NaN	21.7918	1	23.824	1	-2	39938000
A0A1D5PE45	tr|A0A1D5PE45|A0A1D5PE45_CHICK Uncharacterized protein OS=Gallus gallus OX=9031 GN=DHRS4 PE=4 SV=1	NaN	22.2791	1	28.261	0	13.033	71251000
A0A1D5PGW7;A0A1D5PE56;F1NUE0	tr|A0A1D5PGW7|A0A1D5PGW7_CHICK Uncharacterized protein OS=Gallus gallus OX=9031 GN=SRI PE=4 SV=1;tr|A0A1D5PE56|A0A1D5PE56_CHICK Uncharacterized protein OS=Gallus gallus OX=9031 GN=SRI PE=4 SV=1;tr|F1NUE0|F1NUE0_CHICK Uncharacterized protein OS=Gallus gallu	NaN	23.8978	2	21.849	0	19.683	171930000
A0A1D5PE83	tr|A0A1D5PE83|A0A1D5PE83_CHICK Microsomal prostaglandin E synthase 2 OS=Gallus gallus OX=9031 GN=PTGES2 PE=3 SV=2	NaN	21.4151	3	39.617	0	23.41	61521000
E1C181;A0A1D5PE93	tr|E1C181|E1C181_CHICK Cnd3 domain-containing protein OS=Gallus gallus OX=9031 GN=NCAPG PE=3 SV=4;tr|A0A1D5PE93|A0A1D5PE93_CHICK Cnd3 domain-containing protein OS=Gallus gallus OX=9031 GN=NCAPG PE=3 SV=1	NaN	17.6007	2	108.42	0	14.785	8944100
A0A1D5PED8;E1BSD8;A0A3Q2TVW3	tr|A0A1D5PED8|A0A1D5PED8_CHICK Uncharacterized protein OS=Gallus gallus OX=9031 GN=POLR2H PE=3 SV=1;tr|E1BSD8|E1BSD8_CHICK DNA-directed RNA polymerases I, II, and III subunit RPABC3 OS=Gallus gallus OX=9031 GN=POLR2H PE=3 SV=1;tr|A0A3Q2TVW3|A0A3Q2TVW3_CHIC	NaN	23.5788	2	13.883	0	20.812	87700000
A0A1D5PEE1	tr|A0A1D5PEE1|A0A1D5PEE1_CHICK Oxysterol-binding protein OS=Gallus gallus OX=9031 GN=OSBP PE=3 SV=2	NaN	19.6525	3	95.175	0	18.616	37086000
Q5ZL12;E1BX04;A0A1D5PRA2;A0A1D5PEF4	sp|Q5ZL12|PPR21_CHICK Protein phosphatase 1 regulatory subunit 21 OS=Gallus gallus OX=9031 GN=PPP1R21 PE=2 SV=1;tr|E1BX04|E1BX04_CHICK Coiled-coil domain-containing protein 128 OS=Gallus gallus OX=9031 GN=PPP1R21 PE=4 SV=3;tr|A0A1D5PRA2|A0A1D5PRA2_CHICK Co	NaN	18.1906	1	88.857	0	12.649	13462000
Q5F426;A0A1D5PEH3	tr|Q5F426|Q5F426_CHICK Pyruvate dehydrogenase E1 component subunit alpha OS=Gallus gallus OX=9031 GN=PDHA2 PE=2 SV=1;tr|A0A1D5PEH3|A0A1D5PEH3_CHICK Pyruvate dehydrogenase E1 component subunit alpha OS=Gallus gallus OX=9031 GN=PDHA2 PE=4 SV=1	NaN	24.7801	7	44.442	0	73.511	720260000
P09652;F1NMU4;A0A1D5PEI5	sp|P09652|TBB4_CHICK Tubulin beta-4 chain OS=Gallus gallus OX=9031 PE=1 SV=1;tr|F1NMU4|F1NMU4_CHICK Tubulin beta chain OS=Gallus gallus OX=9031 GN=TUBB3 PE=3 SV=4;tr|A0A1D5PEI5|A0A1D5PEI5_CHICK Tubulin beta chain OS=Gallus gallus OX=9031 GN=TUBB3 PE=3 SV=2	NaN	22.6164	3	50.42	0	37.688	128600000
A0A1D5PEJ0;A0A3Q2UNL6;A0A3Q2UKX0;A0A3Q2UGD9;A0A3Q3AF09;A0A3Q3AYD1;A0A3Q2U0P9	tr|A0A1D5PEJ0|A0A1D5PEJ0_CHICK Uncharacterized protein OS=Gallus gallus OX=9031 GN=IGF2BP2 PE=3 SV=2;tr|A0A3Q2UNL6|A0A3Q2UNL6_CHICK Uncharacterized protein OS=Gallus gallus OX=9031 GN=IGF2BP2 PE=3 SV=1;tr|A0A3Q2UKX0|A0A3Q2UKX0_CHICK Uncharacterized protein	NaN	22.6699	7	71.136	0	111.43	200190000
A0A1D5PEJ1	tr|A0A1D5PEJ1|A0A1D5PEJ1_CHICK CBF domain-containing protein OS=Gallus gallus OX=9031 GN=CEBPZ PE=3 SV=1	NaN	16.6821	1	122.48	0.00082271	6.7143	5467600
A0A1D5PEK3	tr|A0A1D5PEK3|A0A1D5PEK3_CHICK Calcium-activated neutral proteinase 1 OS=Gallus gallus OX=9031 GN=CAPN1 PE=3 SV=2	NaN	19.2719	1	81.435	0.00043048	7.3044	24055000
A0A1D5PEN7	tr|A0A1D5PEN7|A0A1D5PEN7_CHICK Coiled-coil domain-containing protein 86 OS=Gallus gallus OX=9031 GN=LOC107056412 PE=4 SV=2	NaN	24.0563	2	12.768	0	12.327	52334000
A0A1D5PEP2	tr|A0A1D5PEP2|A0A1D5PEP2_CHICK R3H domain and coiled-coil containing 1 OS=Gallus gallus OX=9031 PE=4 SV=2	NaN	20.7504	2	49.834	0	16.349	38807000
A0A1D5PEP4	tr|A0A1D5PEP4|A0A1D5PEP4_CHICK G-patch domain-containing protein OS=Gallus gallus OX=9031 GN=GPKOW PE=4 SV=1	NaN	20.6805	2	25.333	0	13.79	15126000
A0A3Q2TWJ4;A0A1D5PES4;A0A1D5PNP7;F1NC62;P29318;F1NJX6;Q07496;A0A3Q2TWZ3;P54755;F1NSE6	tr|A0A3Q2TWJ4|A0A3Q2TWJ4_CHICK Receptor protein-tyrosine kinase OS=Gallus gallus OX=9031 GN=EPHA5 PE=4 SV=1;tr|A0A1D5PES4|A0A1D5PES4_CHICK Receptor protein-tyrosine kinase OS=Gallus gallus OX=9031 GN=EPHA5 PE=4 SV=2;tr|A0A1D5PNP7|A0A1D5PNP7_CHICK Receptor	NaN	18.8479	1	94.467	0.00044583	7.7853	21705000
O93481;A0A1D5PEX8	tr|O93481|O93481_CHICK Chromobox protein (CHCB2) OS=Gallus gallus OX=9031 GN=CBX3 PE=2 SV=1;tr|A0A1D5PEX8|A0A1D5PEX8_CHICK Uncharacterized protein OS=Gallus gallus OX=9031 GN=CBX3 PE=4 SV=1	NaN	24.6058	5	19.777	0	39.908	178720000
A0A1D5PF08	tr|A0A1D5PF08|A0A1D5PF08_CHICK Uncharacterized protein OS=Gallus gallus OX=9031 GN=CANX PE=3 SV=1	NaN	24.1201	6	68.368	0	78.432	547010000
A0A1D5PF37	tr|A0A1D5PF37|A0A1D5PF37_CHICK Uncharacterized protein OS=Gallus gallus OX=9031 GN=MRPL55 PE=4 SV=3	NaN	21.514	2	13.382	0	18.634	20963000
A0A1D5PF61;Q5ZL77	tr|A0A1D5PF61|A0A1D5PF61_CHICK Uncharacterized protein OS=Gallus gallus OX=9031 GN=RIC8B PE=3 SV=2;sp|Q5ZL77|RIC8A_CHICK Synembryn-A OS=Gallus gallus OX=9031 GN=RIC8A PE=2 SV=1	NaN	18.3572	1	60.535	0	14.721	10409000
A0A3Q2TS16;E1BVK0;A0A3Q3AH33;A0A1D5PF65;A0A3Q2UJ38	tr|A0A3Q2TS16|A0A3Q2TS16_CHICK Non-specific serine/threonine protein kinase OS=Gallus gallus OX=9031 GN=MARK1 PE=3 SV=1;tr|E1BVK0|E1BVK0_CHICK Non-specific serine/threonine protein kinase OS=Gallus gallus OX=9031 GN=MARK1 PE=3 SV=4;tr|A0A3Q3AH33|A0A3Q3AH33	NaN	17.9452	1	80.012	0	13.699	10347000
A0A1D5PF79;A0A3Q3AMZ0;Q5ZLT2	tr|A0A1D5PF79|A0A1D5PF79_CHICK Protein-serine/threonine kinase OS=Gallus gallus OX=9031 GN=PDK3 PE=3 SV=1;tr|A0A3Q3AMZ0|A0A3Q3AMZ0_CHICK Protein-serine/threonine kinase OS=Gallus gallus OX=9031 GN=PDK3 PE=3 SV=1;tr|Q5ZLT2|Q5ZLT2_CHICK Protein-serine/threon	NaN	21.1525	3	43.563	0	48.153	55941000
A0A1D5PF81	tr|A0A1D5PF81|A0A1D5PF81_CHICK Uncharacterized protein OS=Gallus gallus OX=9031 GN=RMDN1 PE=4 SV=1	NaN	20.5702	2	34.457	0	12.415	32695000
E1C702;A0A1D5PF91	tr|E1C702|E1C702_CHICK Asparagine--tRNA ligase OS=Gallus gallus OX=9031 GN=NARS2 PE=3 SV=3;tr|A0A1D5PF91|A0A1D5PF91_CHICK Asparagine--tRNA ligase OS=Gallus gallus OX=9031 GN=NARS2 PE=3 SV=1	NaN	20.3421	2	50.385	0	12.088	34560000
E1C4M3;A0A1D5PFA7	tr|E1C4M3|E1C4M3_CHICK Cathepsin X OS=Gallus gallus OX=9031 GN=CTSZ PE=3 SV=1;tr|A0A1D5PFA7|A0A1D5PFA7_CHICK Cathepsin X OS=Gallus gallus OX=9031 GN=CTSZ PE=3 SV=2	NaN	21.1081	1	33.853	0.0070711	5.7884	27123000
F1NQG6;A0A1D5PFC5	tr|F1NQG6|F1NQG6_CHICK Signal transducing adapter molecule 2 OS=Gallus gallus OX=9031 GN=STAM2 PE=3 SV=3;tr|A0A1D5PFC5|A0A1D5PFC5_CHICK Signal transducing adapter molecule 2 OS=Gallus gallus OX=9031 GN=STAM2 PE=3 SV=1	NaN	17.8146	1	52.432	0.0023566	6.2219	5071700
A0A1D5PFC7;A0A1D5PWK3;F1P1Z3	tr|A0A1D5PFC7|A0A1D5PFC7_CHICK Uncharacterized protein OS=Gallus gallus OX=9031 GN=SYT9 PE=4 SV=1;tr|A0A1D5PWK3|A0A1D5PWK3_CHICK Uncharacterized protein OS=Gallus gallus OX=9031 GN=SYT9 PE=4 SV=1;tr|F1P1Z3|F1P1Z3_CHICK Uncharacterized protein OS=Gallus gal	NaN	19.9838	1	51.159	0.0023981	6.3944	22813000
A0A1D5PFD3;Q5ZKQ5;F1NDU0	tr|A0A1D5PFD3|A0A1D5PFD3_CHICK Golgi membrane protein 2 OS=Gallus gallus OX=9031 GN=CASC4 PE=3 SV=1;sp|Q5ZKQ5|GOLM2_CHICK Protein GOLM2 OS=Gallus gallus OX=9031 GN=GOLM2 PE=2 SV=1;tr|F1NDU0|F1NDU0_CHICK Golgi membrane protein 2 OS=Gallus gallus OX=9031 GN=	NaN	20.5786	2	49.531	0	15.665	37581000
A0A1D5PFG3;A0A1D5PWR4;A0A1D5PQ85;A0A1D5P9F9	tr|A0A1D5PFG3|A0A1D5PFG3_CHICK Uncharacterized protein OS=Gallus gallus OX=9031 GN=C3 PE=4 SV=2;tr|A0A1D5PWR4|A0A1D5PWR4_CHICK Uncharacterized protein OS=Gallus gallus OX=9031 GN=C3 PE=4 SV=2;tr|A0A1D5PQ85|A0A1D5PQ85_CHICK Uncharacterized protein OS=Gallus	NaN	19.8615	3	179.25	0	85.118	78111000
A0A1D5PFJ2;A0A1D5PL09;F1NB94;A0A3Q2U6J9;A0A1D5PFM3;E1C5E0	tr|A0A1D5PFJ2|A0A1D5PFJ2_CHICK Calpain inhibitor OS=Gallus gallus OX=9031 GN=CAST PE=3 SV=2;tr|A0A1D5PL09|A0A1D5PL09_CHICK Calpain inhibitor OS=Gallus gallus OX=9031 GN=CAST PE=3 SV=1;tr|F1NB94|F1NB94_CHICK Calpain inhibitor OS=Gallus gallus OX=9031 GN=CAS	NaN	19.3302	3	78.061	0	19.93	23069000
F1NWP3;A0A1D5PYK0;A0A1D5PFJ6;A0A1L1RPG0;O73885	tr|F1NWP3|F1NWP3_CHICK Heat shock cognate 71 kDa protein OS=Gallus gallus OX=9031 GN=HSPA8 PE=3 SV=2;tr|A0A1D5PYK0|A0A1D5PYK0_CHICK Heat shock cognate 71 kDa protein OS=Gallus gallus OX=9031 GN=HSPA8 PE=3 SV=2;tr|A0A1D5PFJ6|A0A1D5PFJ6_CHICK Heat shock cogn	24.1334	30.2385	23	64.786	0	323.31	39840000000
A0A1D5PFK0;F1NNP8	tr|A0A1D5PFK0|A0A1D5PFK0_CHICK Bms1-type G domain-containing protein OS=Gallus gallus OX=9031 GN=SMG6 PE=4 SV=2;tr|F1NNP8|F1NNP8_CHICK Bms1-type G domain-containing protein OS=Gallus gallus OX=9031 GN=SMG6 PE=4 SV=3	NaN	22.2682	6	92.116	0	59.892	156580000
A0A1D5PFK3	tr|A0A1D5PFK3|A0A1D5PFK3_CHICK Alpha-dystroglycan OS=Gallus gallus OX=9031 GN=DAG1 PE=4 SV=1	NaN	18.5039	2	97.709	0	14.599	16356000
A0A1D5PFL9	tr|A0A1D5PFL9|A0A1D5PFL9_CHICK Nuclear pore complex protein Nup93 OS=Gallus gallus OX=9031 GN=NUP93 PE=3 SV=1	NaN	22.1744	7	93.598	0	56.646	241390000
Q98SH2;A0A1D5PFN0;A0A1D5PXJ7	sp|Q98SH2|AT2B1_CHICK Plasma membrane calcium-transporting ATPase 1 OS=Gallus gallus OX=9031 GN=ATP2B1 PE=2 SV=2;tr|A0A1D5PFN0|A0A1D5PFN0_CHICK Calcium-transporting ATPase OS=Gallus gallus OX=9031 GN=ATP2B1 PE=3 SV=2;tr|A0A1D5PXJ7|A0A1D5PXJ7_CHICK Calcium-	NaN	22.6866	6	133.02	0	155.57	344270000
A0A1D5PYJ4;A0A1D5PG96;A0A1D5PFQ6;A0A3Q2TYJ7	tr|A0A1D5PYJ4|A0A1D5PYJ4_CHICK GATA-type domain-containing protein OS=Gallus gallus OX=9031 GN=GATAD2A PE=4 SV=2;tr|A0A1D5PG96|A0A1D5PG96_CHICK GATA-type domain-containing protein OS=Gallus gallus OX=9031 GN=GATAD2A PE=4 SV=1;tr|A0A1D5PFQ6|A0A1D5PFQ6_CHICK	NaN	20.2653	3	59.87	0	19.144	36550000
A0A1D5PFS5	tr|A0A1D5PFS5|A0A1D5PFS5_CHICK Maturin OS=Gallus gallus OX=9031 PE=3 SV=2	NaN	22.0698	1	14.965	0	18.385	13207000
A0A1D5PFT2	tr|A0A1D5PFT2|A0A1D5PFT2_CHICK Uncharacterized protein OS=Gallus gallus OX=9031 GN=BABAM1 PE=4 SV=2	NaN	20.4448	2	49.79	0	71.427	38535000
Q5ZMA8;A0A1D5PX83;A0A1D5PFT4	tr|Q5ZMA8|Q5ZMA8_CHICK Uncharacterized protein OS=Gallus gallus OX=9031 GN=SS18 PE=2 SV=1;tr|A0A1D5PX83|A0A1D5PX83_CHICK Uncharacterized protein OS=Gallus gallus OX=9031 GN=SS18 PE=3 SV=1;tr|A0A1D5PFT4|A0A1D5PFT4_CHICK Uncharacterized protein OS=Gallus gal	NaN	21.219	1	38.402	0.0024038	6.4051	12204000
Q98TF7;A0A1D5PFV4	sp|Q98TF7|RL35_CHICK 60S ribosomal protein L35 OS=Gallus gallus OX=9031 GN=RPL35 PE=2 SV=3;tr|A0A1D5PFV4|A0A1D5PFV4_CHICK 60S ribosomal protein L35 OS=Gallus gallus OX=9031 GN=RPL35 PE=4 SV=2	NaN	28.4064	2	14.551	0	48.072	1067300000
A0A1D5PFV9	tr|A0A1D5PFV9|A0A1D5PFV9_CHICK Protein kinase domain-containing protein OS=Gallus gallus OX=9031 GN=SRPK1 PE=4 SV=1	NaN	22.7449	7	83.694	0	75.924	246010000
A0A1D5PFX6	tr|A0A1D5PFX6|A0A1D5PFX6_CHICK Uncharacterized protein OS=Gallus gallus OX=9031 GN=RBM12 PE=4 SV=1	NaN	23.5314	12	93.043	0	130.59	375850000
A0A1D5PFY6;A0A3Q2U5V8;A0A3Q3ACZ0;A0A3Q2UNM0	tr|A0A1D5PFY6|A0A1D5PFY6_CHICK HTH La-type RNA-binding domain-containing protein OS=Gallus gallus OX=9031 GN=LARP1 PE=4 SV=2;tr|A0A3Q2U5V8|A0A3Q2U5V8_CHICK HTH La-type RNA-binding domain-containing protein OS=Gallus gallus OX=9031 GN=LARP1 PE=4 SV=1;tr|A0A	NaN	19.8686	5	118.61	0	60.744	55521000
A0A1D5PFY7	tr|A0A1D5PFY7|A0A1D5PFY7_CHICK Succinate-semialdehyde dehydrogenase OS=Gallus gallus OX=9031 GN=ALDH5A1 PE=3 SV=1	NaN	23.0522	6	57.922	0	107.92	278330000
A0A1D5PG13	tr|A0A1D5PG13|A0A1D5PG13_CHICK Protein transport protein Sec61 subunit gamma OS=Gallus gallus OX=9031 GN=SEC61G PE=3 SV=1	NaN	22.0557	1	7.7412	0.00043159	7.3293	13078000
A0A1D5PG62;A0A3Q2U636	tr|A0A1D5PG62|A0A1D5PG62_CHICK UBC core domain-containing protein OS=Gallus gallus OX=9031 GN=UBE2E2 PE=3 SV=2;tr|A0A3Q2U636|A0A3Q2U636_CHICK UBC core domain-containing protein OS=Gallus gallus OX=9031 GN=UBE2E2 PE=3 SV=1	NaN	21.7099	1	19.809	0	33.247	30872000
A0A1D5PG75	tr|A0A1D5PG75|A0A1D5PG75_CHICK Uncharacterized protein OS=Gallus gallus OX=9031 GN=GGT5 PE=3 SV=3	NaN	16.4499	1	60.222	1	-2	2416900
A0A1D5PG82;E1BXE0	tr|A0A1D5PG82|A0A1D5PG82_CHICK Uncharacterized protein OS=Gallus gallus OX=9031 GN=GOLIM4 PE=4 SV=3;tr|E1BXE0|E1BXE0_CHICK Uncharacterized protein OS=Gallus gallus OX=9031 GN=GOLIM4 PE=4 SV=5	NaN	18.4102	1	75.939	0.0084808	5.7022	11844000
A0A1D5PGA0	tr|A0A1D5PGA0|A0A1D5PGA0_CHICK Small nuclear ribonucleoprotein Sm D1 OS=Gallus gallus OX=9031 GN=SNRPD1 PE=3 SV=2	NaN	26.1961	2	13.281	0	18.949	307520000
A0A1D5PGB1	tr|A0A1D5PGB1|A0A1D5PGB1_CHICK Uncharacterized protein OS=Gallus gallus OX=9031 GN=GALK2 PE=3 SV=2	NaN	17.8741	1	50.067	0.0067517	5.8315	4324300
A0A1D5PGC2;E1C8A2	tr|A0A1D5PGC2|A0A1D5PGC2_CHICK POTRA domain-containing protein OS=Gallus gallus OX=9031 GN=SAMM50 PE=3 SV=2;tr|E1C8A2|E1C8A2_CHICK POTRA domain-containing protein OS=Gallus gallus OX=9031 GN=SAMM50 PE=3 SV=1	NaN	20.6608	2	48.181	0	13.899	44757000
A0A3Q3AQG0;F1N9F3;A0A1D5PGC8;A0A3Q2UFT2;E1BSC6	tr|A0A3Q3AQG0|A0A3Q3AQG0_CHICK Oxysterol-binding protein OS=Gallus gallus OX=9031 GN=OSBPL8 PE=3 SV=1;tr|F1N9F3|F1N9F3_CHICK Oxysterol-binding protein OS=Gallus gallus OX=9031 GN=OSBPL8 PE=3 SV=3;tr|A0A1D5PGC8|A0A1D5PGC8_CHICK Oxysterol-binding protein OS=	17.2663	18.0142	2	91.077	0	15.547	19851000
A0A1D5PGF0	tr|A0A1D5PGF0|A0A1D5PGF0_CHICK Uncharacterized protein OS=Gallus gallus OX=9031 GN=GHITM PE=3 SV=1	NaN	20.2757	1	36.579	0.0049866	6.0152	19041000
F1NB68;P49024;A0A3Q2UB68;A0A3Q2UAL9;A0A1D5PGG4	tr|F1NB68|F1NB68_CHICK Paxillin OS=Gallus gallus OX=9031 GN=TGFB1I1 PE=3 SV=4;sp|P49024|PAXI_CHICK Paxillin OS=Gallus gallus OX=9031 GN=PXN PE=1 SV=1;tr|A0A3Q2UB68|A0A3Q2UB68_CHICK Uncharacterized protein OS=Gallus gallus OX=9031 GN=TGFB1I1 PE=4 SV=1;tr|A0	NaN	18.8869	1	61.059	0	22.203	14058000
A0A1D5PGH1;P17790	tr|A0A1D5PGH1|A0A1D5PGH1_CHICK Basigin OS=Gallus gallus OX=9031 GN=BSG PE=4 SV=2;sp|P17790|BASI_CHICK Basigin OS=Gallus gallus OX=9031 GN=BSG PE=1 SV=2	NaN	24.3573	6	39.823	0	173.35	300890000
A0A3Q2UF31;A0A1D5PGH3;A0A3Q2U1S2	tr|A0A3Q2UF31|A0A3Q2UF31_CHICK PPM-type phosphatase domain-containing protein OS=Gallus gallus OX=9031 GN=PDP1 PE=3 SV=1;tr|A0A1D5PGH3|A0A1D5PGH3_CHICK PPM-type phosphatase domain-containing protein OS=Gallus gallus OX=9031 GN=PDP1 PE=3 SV=1;tr|A0A3Q2U1S2|	NaN	19.8533	2	60.616	0	70.057	29363000
A0A3Q3AED9;A0A1D5PGI3;A0A1D5PV44	tr|A0A3Q3AED9|A0A3Q3AED9_CHICK Uncharacterized protein OS=Gallus gallus OX=9031 GN=SFXN1 PE=3 SV=1;tr|A0A1D5PGI3|A0A1D5PGI3_CHICK Sidoreflexin OS=Gallus gallus OX=9031 GN=SFXN1 PE=3 SV=2;tr|A0A1D5PV44|A0A1D5PV44_CHICK Sidoreflexin OS=Gallus gallus OX=9031	NaN	24.6185	8	29.547	0	141.64	334860000
E1BUS7;Q8JHZ8;A0A1D5PGJ3	tr|E1BUS7|E1BUS7_CHICK Paladin OS=Gallus gallus OX=9031 GN=PALD1 PE=4 SV=4;sp|Q8JHZ8|PALD_CHICK Paladin OS=Gallus gallus OX=9031 GN=PALD1 PE=2 SV=2;tr|A0A1D5PGJ3|A0A1D5PGJ3_CHICK Paladin OS=Gallus gallus OX=9031 GN=PALD1 PE=4 SV=1	NaN	19.6395	2	93.829	0	17.132	39203000
A0A1L1RVM1;F1P0S2;A0A1D5PGL9	tr|A0A1L1RVM1|A0A1L1RVM1_CHICK t-SNARE coiled-coil homology domain-containing protein OS=Gallus gallus OX=9031 GN=STX8 PE=4 SV=1;tr|F1P0S2|F1P0S2_CHICK t-SNARE coiled-coil homology domain-containing protein OS=Gallus gallus OX=9031 GN=STX8 PE=4 SV=1;tr|A0A	NaN	22.0481	2	26.569	0	17.602	60713000
A0A1D5PH20	tr|A0A1D5PH20|A0A1D5PH20_CHICK Uncharacterized protein OS=Gallus gallus OX=9031 GN=SMG8 PE=3 SV=2	NaN	19.524	1	71.642	0.00043554	7.473	27140000
A0A1D5PH35;F1NKW5	tr|A0A1D5PH35|A0A1D5PH35_CHICK Uncharacterized protein OS=Gallus gallus OX=9031 GN=CPSF3 PE=4 SV=1;tr|F1NKW5|F1NKW5_CHICK Uncharacterized protein OS=Gallus gallus OX=9031 GN=CPSF3 PE=4 SV=3	NaN	17.2633	2	72.196	0	11.149	4719200
A0A1D5PH43	tr|A0A1D5PH43|A0A1D5PH43_CHICK Uncharacterized protein OS=Gallus gallus OX=9031 GN=YKT6 PE=3 SV=1	NaN	19.233	1	22.423	0	12.636	8626700
A0A1D5PH50	tr|A0A1D5PH50|A0A1D5PH50_CHICK RBR-type E3 ubiquitin transferase OS=Gallus gallus OX=9031 GN=ARIH1 PE=4 SV=1	NaN	20.6809	2	63.838	0	11.71	43706000
A0A1D5PH76	tr|A0A1D5PH76|A0A1D5PH76_CHICK Uncharacterized protein OS=Gallus gallus OX=9031 GN=FAM89A PE=4 SV=2	NaN	18.7703	1	14.515	0.00083647	6.9185	2682800
A0A1D5PHB1	tr|A0A1D5PHB1|A0A1D5PHB1_CHICK HEXIM P-TEFb complex subunit 1 OS=Gallus gallus OX=9031 PE=3 SV=3	NaN	21.6448	2	32.816	0.00047939	10.678	42626000
A0A1D5PHC5;F1NC33;Q04619	tr|A0A1D5PHC5|A0A1D5PHC5_CHICK Heat shock cognate protein HSP 90-beta OS=Gallus gallus OX=9031 GN=HSP90AB1 PE=3 SV=1;tr|F1NC33|F1NC33_CHICK Heat shock cognate protein HSP 90-beta OS=Gallus gallus OX=9031 GN=HSP90AB1 PE=3 SV=1;sp|Q04619|HS90B_CHICK Heat sho	NaN	26.1547	18	80.018	0	291.03	2540000000
A0A1D5PHJ9;A0A3Q2UNP2;A0A1D5P6M3	tr|A0A1D5PHJ9|A0A1D5PHJ9_CHICK 1,4-alpha-glucan branching enzyme OS=Gallus gallus OX=9031 GN=GBE1 PE=3 SV=1;tr|A0A3Q2UNP2|A0A3Q2UNP2_CHICK 1,4-alpha-glucan branching enzyme OS=Gallus gallus OX=9031 GN=GBE1 PE=3 SV=1;tr|A0A1D5P6M3|A0A1D5P6M3_CHICK 1,4-alpha	NaN	19.6779	2	79.501	0	11.405	29357000
A0A1D5PHK9	tr|A0A1D5PHK9|A0A1D5PHK9_CHICK PDZ domain-containing protein OS=Gallus gallus OX=9031 GN=HTRA2 PE=3 SV=1	NaN	21.7639	3	21.699	0	19.921	35612000
A0A1D5PHL0	tr|A0A1D5PHL0|A0A1D5PHL0_CHICK Proteasome subunit alpha type OS=Gallus gallus OX=9031 GN=PSMA2 PE=3 SV=1	NaN	23.4893	4	25.919	0	61.64	153080000
A0A1D5PHL1	tr|A0A1D5PHL1|A0A1D5PHL1_CHICK Uncharacterized protein OS=Gallus gallus OX=9031 GN=RBM14 PE=4 SV=2	NaN	22.4479	6	77.306	0	102.4	160190000
A0A1D5PHM1	tr|A0A1D5PHM1|A0A1D5PHM1_CHICK Septin-type G domain-containing protein OS=Gallus gallus OX=9031 GN=SEPT4 PE=3 SV=2	NaN	23.6988	1	55.209	0.0053599	6.0024	435720000
A0A1D5PHS2	tr|A0A1D5PHS2|A0A1D5PHS2_CHICK IF rod domain-containing protein OS=Gallus gallus OX=9031 GN=KRT18 PE=3 SV=2	24.3035	26.9674	14	46.849	0	318.24	3646200000
Q6R748;A0A1D5PK28;A0A1D5PHU2	sp|Q6R748|STXB1_CHICK Syntaxin-binding protein 1 OS=Gallus gallus OX=9031 GN=STXBP1 PE=2 SV=1;tr|A0A1D5PK28|A0A1D5PK28_CHICK Syntaxin-binding protein 1 OS=Gallus gallus OX=9031 GN=STXBP1 PE=3 SV=1;tr|A0A1D5PHU2|A0A1D5PHU2_CHICK Syntaxin-binding protein 1 O	NaN	22.2116	5	67.472	0	38.071	150570000
Q5ZM96;A0A1D5PHZ2	sp|Q5ZM96|QTRT2_CHICK Queuine tRNA-ribosyltransferase accessory subunit 2 OS=Gallus gallus OX=9031 GN=QTRT2 PE=2 SV=1;tr|A0A1D5PHZ2|A0A1D5PHZ2_CHICK Queuine tRNA-ribosyltransferase accessory subunit 2 OS=Gallus gallus OX=9031 GN=QTRT2 PE=3 SV=1	NaN	21.5123	3	47.064	0	24.237	65808000
A0A1D5PI06	tr|A0A1D5PI06|A0A1D5PI06_CHICK NADH dehydrogenase [ubiquinone] flavoprotein 2, mitochondrial OS=Gallus gallus OX=9031 GN=NDUFV2 PE=3 SV=1	NaN	24.5311	9	26.893	0	110.82	339420000
A0A1D5PI14;A0A1D5PXG9	tr|A0A1D5PI14|A0A1D5PI14_CHICK Uncharacterized protein OS=Gallus gallus OX=9031 GN=TBL1X PE=4 SV=2;tr|A0A1D5PXG9|A0A1D5PXG9_CHICK Uncharacterized protein OS=Gallus gallus OX=9031 GN=TBL1X PE=4 SV=1	NaN	20.5412	2	56.395	0	137.42	35095000
A0A1D5PI21	tr|A0A1D5PI21|A0A1D5PI21_CHICK eIF-2B GDP-GTP exchange factor subunit epsilon OS=Gallus gallus OX=9031 GN=EIF2B5 PE=3 SV=1	NaN	21.6503	3	80.513	0	27.419	88872000
Q5F418;A0A1D5PI39	sp|Q5F418|PSMD1_CHICK 26S proteasome non-ATPase regulatory subunit 1 OS=Gallus gallus OX=9031 GN=PSMD1 PE=2 SV=1;tr|A0A1D5PI39|A0A1D5PI39_CHICK 26S proteasome non-ATPase regulatory subunit 1 OS=Gallus gallus OX=9031 GN=PSMD1 PE=3 SV=1	NaN	23.7906	13	106.06	0	95.339	682000000
A0A1D5PI58;P01013	tr|A0A1D5PI58|A0A1D5PI58_CHICK SERPIN domain-containing protein OS=Gallus gallus OX=9031 GN=OVALX PE=3 SV=1;sp|P01013|OVALX_CHICK Ovalbumin-related protein X (Fragment) OS=Gallus gallus OX=9031 GN=SERPINB14C PE=1 SV=1	22.1444	27.1597	11	43.627	0	152.27	3400400000
A0A1D5PI64;A0A3Q2UCQ3;F1N8K3;A0A1D5PT80	tr|A0A1D5PI64|A0A1D5PI64_CHICK Arf-GAP domain-containing protein OS=Gallus gallus OX=9031 GN=ARFGAP1 PE=4 SV=2;tr|A0A3Q2UCQ3|A0A3Q2UCQ3_CHICK Arf-GAP domain-containing protein OS=Gallus gallus OX=9031 GN=ARFGAP1 PE=4 SV=1;tr|F1N8K3|F1N8K3_CHICK Arf-GAP dom	NaN	21.3193	1	44.357	0.0016155	6.4925	49715000
A0A1D5PP94;A0A1D5PI72;A0A1D5PDR7	tr|A0A1D5PP94|A0A1D5PP94_CHICK Dynamin GTPase OS=Gallus gallus OX=9031 GN=LOC430067 PE=3 SV=2;tr|A0A1D5PI72|A0A1D5PI72_CHICK Dynamin GTPase OS=Gallus gallus OX=9031 GN=LOC430067 PE=3 SV=2;tr|A0A1D5PDR7|A0A1D5PDR7_CHICK Dynamin GTPase OS=Gallus gallus OX=90	NaN	22.9611	8	90.214	0	189.05	351110000
A0A1D5PVT3;A0A1D5PI82;E1C929;A0A3Q2U858;F1NCB1	tr|A0A1D5PVT3|A0A1D5PVT3_CHICK AKAP2_C domain-containing protein OS=Gallus gallus OX=9031 GN=PALM2AKAP2 PE=3 SV=2;tr|A0A1D5PI82|A0A1D5PI82_CHICK AKAP2_C domain-containing protein OS=Gallus gallus OX=9031 GN=PALM2AKAP2 PE=3 SV=2;tr|E1C929|E1C929_CHICK AKAP2	NaN	17.9417	2	116.83	0	28.019	14854000
A0A1D5PI87;A0A3Q2UAV3	tr|A0A1D5PI87|A0A1D5PI87_CHICK Uncharacterized protein OS=Gallus gallus OX=9031 GN=HSD17B10 PE=3 SV=2;tr|A0A3Q2UAV3|A0A3Q2UAV3_CHICK Uncharacterized protein OS=Gallus gallus OX=9031 GN=HSD17B10 PE=3 SV=1	NaN	25.8532	7	43.384	0	144.9	1454800000
Q9YHT2;A0A1D5PIF0	sp|Q9YHT2|SDHB_CHICK Succinate dehydrogenase [ubiquinone] iron-sulfur subunit, mitochondrial OS=Gallus gallus OX=9031 GN=SDHB PE=1 SV=1;tr|A0A1D5PIF0|A0A1D5PIF0_CHICK Succinate dehydrogenase [ubiquinone] iron-sulfur subunit, mitochondrial OS=Gallus gallus	NaN	23.6158	7	32.597	0	123.06	218530000
A0A1D5PIH8	tr|A0A1D5PIH8|A0A1D5PIH8_CHICK Uncharacterized protein OS=Gallus gallus OX=9031 GN=CEP250 PE=4 SV=2	NaN	18.6753	1	299.79	0.0053496	5.9945	61955000
A0A1D5PT04;A0A1D5PIN3	tr|A0A1D5PT04|A0A1D5PT04_CHICK Nucleolar protein 6 OS=Gallus gallus OX=9031 GN=NOL6 PE=3 SV=2;tr|A0A1D5PIN3|A0A1D5PIN3_CHICK Nucleolar protein 6 OS=Gallus gallus OX=9031 GN=NOL6 PE=3 SV=2	NaN	17.5981	2	128.99	0	14.572	11110000
A0A3Q2TSG4;A0A3Q2TWE1;A0A3Q2UCW3;Q5ZI74;A0A1D5PIN7;A0A3Q2U0G0	tr|A0A3Q2TSG4|A0A3Q2TSG4_CHICK RNA helicase OS=Gallus gallus OX=9031 GN=DHX30 PE=3 SV=1;tr|A0A3Q2TWE1|A0A3Q2TWE1_CHICK RNA helicase OS=Gallus gallus OX=9031 GN=DHX30 PE=3 SV=1;tr|A0A3Q2UCW3|A0A3Q2UCW3_CHICK RNA helicase OS=Gallus gallus OX=9031 GN=DHX30 PE	NaN	17.9804	2	129.79	0	12.815	16550000
A0A3Q2U670;A0A1D5PIQ5	tr|A0A3Q2U670|A0A3Q2U670_CHICK Mitogen-activated protein kinase OS=Gallus gallus OX=9031 GN=MAPK14 PE=3 SV=1;tr|A0A1D5PIQ5|A0A1D5PIQ5_CHICK Mitogen-activated protein kinase OS=Gallus gallus OX=9031 GN=MAPK14 PE=3 SV=2	NaN	20.6893	1	41.632	0.00083752	6.9519	30434000
A0A1D5PIQ9	tr|A0A1D5PIQ9|A0A1D5PIQ9_CHICK G domain-containing protein OS=Gallus gallus OX=9031 GN=NOA1 PE=4 SV=1	NaN	17.9378	1	68.521	0.00043898	7.5606	9039300
A0A1D5PIT4	tr|A0A1D5PIT4|A0A1D5PIT4_CHICK Lipocln_cytosolic_FA-bd_dom domain-containing protein OS=Gallus gallus OX=9031 GN=PTGDS PE=3 SV=1	NaN	21.4013	1	20.873	0.00045641	8.2724	22158000
A0A3Q3AES4;A0A1D5PLQ6;A0A1D5PIW4;A0A3Q2TZA0	tr|A0A3Q3AES4|A0A3Q3AES4_CHICK ULP_PROTEASE domain-containing protein OS=Gallus gallus OX=9031 GN=SENP1 PE=3 SV=1;tr|A0A1D5PLQ6|A0A1D5PLQ6_CHICK ULP_PROTEASE domain-containing protein OS=Gallus gallus OX=9031 GN=SENP1 PE=3 SV=2;tr|A0A1D5PIW4|A0A1D5PIW4_CHI	NaN	18.6127	1	73.318	0.00046019	8.5931	12427000
A0A1L1RUL3;A0A1D5PIZ1	tr|A0A1L1RUL3|A0A1L1RUL3_CHICK Peptidase_M3 domain-containing protein OS=Gallus gallus OX=9031 GN=THOP1 PE=3 SV=2;tr|A0A1D5PIZ1|A0A1D5PIZ1_CHICK Peptidase_M3 domain-containing protein OS=Gallus gallus OX=9031 GN=THOP1 PE=3 SV=1	NaN	18.1998	2	74.705	0	33.965	11441000
A0A1D5PJ03	tr|A0A1D5PJ03|A0A1D5PJ03_CHICK Uncharacterized protein OS=Gallus gallus OX=9031 GN=NT5DC2 PE=3 SV=1	NaN	22.7126	6	65.775	0	110.39	199320000
A0A1D5PJ08	tr|A0A1D5PJ08|A0A1D5PJ08_CHICK Uncharacterized protein OS=Gallus gallus OX=9031 GN=NID1 PE=4 SV=3	17.7656	20.456	4	126.52	0	30.475	78078000
A0A1D5PUZ2;A0A1D5PJ18;A0A1L1RXJ1	tr|A0A1D5PUZ2|A0A1D5PUZ2_CHICK Glutaminyl-tRNA synthetase OS=Gallus gallus OX=9031 GN=QARS PE=3 SV=1;tr|A0A1D5PJ18|A0A1D5PJ18_CHICK Glutaminyl-tRNA synthetase OS=Gallus gallus OX=9031 GN=QARS PE=3 SV=1;tr|A0A1L1RXJ1|A0A1L1RXJ1_CHICK Glutaminyl-tRNA synthet	NaN	23.14	11	94.011	0	93.998	462170000
A0A1D5PJ40;A0A1D5PL88	tr|A0A1D5PJ40|A0A1D5PJ40_CHICK Clathrin light chain OS=Gallus gallus OX=9031 GN=CLTB PE=3 SV=1;tr|A0A1D5PL88|A0A1D5PL88_CHICK Clathrin light chain OS=Gallus gallus OX=9031 GN=CLTB PE=3 SV=1	NaN	19.9301	1	23.121	0.0095273	5.673	8991000
A0A1D5PJ54	tr|A0A1D5PJ54|A0A1D5PJ54_CHICK Uncharacterized protein OS=Gallus gallus OX=9031 PE=4 SV=2	NaN	22.7541	1	14.166	0	25.141	28296000
A0A1D5PJA6;Q5F3U4	tr|A0A1D5PJA6|A0A1D5PJA6_CHICK 3-phosphoinositide-dependent protein kinase 1 OS=Gallus gallus OX=9031 GN=PDPK1 PE=3 SV=2;tr|Q5F3U4|Q5F3U4_CHICK 3-phosphoinositide-dependent protein kinase 1 OS=Gallus gallus OX=9031 GN=PDPK1 PE=2 SV=1	NaN	19.0195	2	60.318	0	15.247	12755000
A0A1D5PJG4;A0A3Q2UAF8;F1NZU2	tr|A0A1D5PJG4|A0A1D5PJG4_CHICK Uncharacterized protein OS=Gallus gallus OX=9031 GN=SYNCRIP PE=4 SV=1;tr|A0A3Q2UAF8|A0A3Q2UAF8_CHICK Uncharacterized protein OS=Gallus gallus OX=9031 GN=SYNCRIP PE=4 SV=1;tr|F1NZU2|F1NZU2_CHICK Uncharacterized protein OS=Gall	NaN	26.0907	12	62.677	0	245.57	2072400000
A0A1L1RZJ6;A0A1D5PJG9;A0A1D5P3S4	tr|A0A1L1RZJ6|A0A1L1RZJ6_CHICK ATP synthase subunit alpha OS=Gallus gallus OX=9031 GN=ATP5A1W PE=3 SV=2;tr|A0A1D5PJG9|A0A1D5PJG9_CHICK ATP synthase subunit alpha OS=Gallus gallus OX=9031 GN=ATP5A1W PE=3 SV=2;tr|A0A1D5P3S4|A0A1D5P3S4_CHICK ATP synthase subu	NaN	22.0151	1	60.027	0	17.694	131390000
A0A1D5PJI0	tr|A0A1D5PJI0|A0A1D5PJI0_CHICK Septin-7 OS=Gallus gallus OX=9031 GN=SEPT7 PE=3 SV=2	NaN	17.0425	1	48.703	0.0038536	6.0592	2834700
F1P0X3;A0A1D5PJI5	tr|F1P0X3|F1P0X3_CHICK Septin-type G domain-containing protein OS=Gallus gallus OX=9031 GN=SEPTIN11 PE=3 SV=2;tr|A0A1D5PJI5|A0A1D5PJI5_CHICK Septin-type G domain-containing protein OS=Gallus gallus OX=9031 GN=SEPTIN11 PE=3 SV=2	NaN	25.0206	6	50.634	0	198.47	714770000
A0A1D5PJJ8	tr|A0A1D5PJJ8|A0A1D5PJJ8_CHICK Uncharacterized protein OS=Gallus gallus OX=9031 GN=HIP1 PE=3 SV=2	NaN	19.8429	3	113.05	0	27.898	52660000
A0A1D5PJL7	tr|A0A1D5PJL7|A0A1D5PJL7_CHICK Uncharacterized protein OS=Gallus gallus OX=9031 GN=PM5 PE=4 SV=1	NaN	17.442	1	132.88	0.00047642	10.292	11574000
A0A1D5PJM6	tr|A0A1D5PJM6|A0A1D5PJM6_CHICK Uncharacterized protein OS=Gallus gallus OX=9031 GN=NUP214 PE=4 SV=3	NaN	16.0984	1	206.89	0.00043764	7.5308	5402700
F1NLF2;A0A1D5PJQ8;E1BVW8;Q8UUW7	tr|F1NLF2|F1NLF2_CHICK KH domain-containing, RNA-binding, signal transduction-associated protein 1 OS=Gallus gallus OX=9031 GN=KHDRBS1 PE=3 SV=3;tr|A0A1D5PJQ8|A0A1D5PJQ8_CHICK KH domain-containing, RNA-binding, signal transduction-associated protein 1 OS=G	NaN	24.0933	2	46.525	0	33.043	196880000
A0A1D5PJR5;Q5ZM11	tr|A0A1D5PJR5|A0A1D5PJR5_CHICK Arginine--tRNA ligase, cytoplasmic OS=Gallus gallus OX=9031 GN=RARS PE=3 SV=1;sp|Q5ZM11|SYRC_CHICK Arginine--tRNA ligase, cytoplasmic OS=Gallus gallus OX=9031 GN=RARS1 PE=2 SV=1	NaN	23.5648	13	75.471	0	126.89	459090000
A0A1D5PJW4;O13268	tr|A0A1D5PJW4|A0A1D5PJW4_CHICK Proteasome subunit alpha type OS=Gallus gallus OX=9031 GN=PSMA7 PE=3 SV=1;sp|O13268|PSA7_CHICK Proteasome subunit alpha type-7 OS=Gallus gallus OX=9031 GN=PSMA7 PE=2 SV=1	NaN	25.8743	7	27.872	0	91.888	861110000
E1C784;A0A1D5PJX0;A0A3Q2TVE8;A0A1D5PDT3;A0A1D5PU07;A0A1D5PXK5;A0A3Q2U0I3	tr|E1C784|E1C784_CHICK Calcium-transporting ATPase OS=Gallus gallus OX=9031 GN=ATP2B4 PE=3 SV=4;tr|A0A1D5PJX0|A0A1D5PJX0_CHICK Calcium-transporting ATPase OS=Gallus gallus OX=9031 GN=ATP2B4 PE=3 SV=2;tr|A0A3Q2TVE8|A0A3Q2TVE8_CHICK Calcium-transporting ATPa	NaN	19.9273	3	129.51	0	20.009	49854000
A0A1D5PJZ8	tr|A0A1D5PJZ8|A0A1D5PJZ8_CHICK PAT1 domain-containing protein OS=Gallus gallus OX=9031 GN=PATL1 PE=3 SV=2	NaN	18.7952	1	84.371	0.00043253	7.3449	17741000
A0A1D5PK62;A0A1D5PCF9	tr|A0A1D5PK62|A0A1D5PK62_CHICK Coatomer subunit zeta OS=Gallus gallus OX=9031 GN=COPZ1 PE=3 SV=1;tr|A0A1D5PCF9|A0A1D5PCF9_CHICK Coatomer subunit zeta OS=Gallus gallus OX=9031 GN=COPZ1 PE=3 SV=2	NaN	24.201	4	33.762	0	34.304	231430000
A0A1D5PKC2	tr|A0A1D5PKC2|A0A1D5PKC2_CHICK dTMP kinase OS=Gallus gallus OX=9031 GN=DTYMK PE=3 SV=1	NaN	21.3253	2	24.082	0	11.895	36786000
Q5ZMI4;A0A1D5PKF0;A0A3Q2U184;A0A1L1S0M1	sp|Q5ZMI4|MVP_CHICK Major vault protein OS=Gallus gallus OX=9031 GN=MVP PE=2 SV=1;tr|A0A1D5PKF0|A0A1D5PKF0_CHICK Major vault protein OS=Gallus gallus OX=9031 GN=MVP PE=4 SV=1;tr|A0A3Q2U184|A0A3Q2U184_CHICK Major vault protein OS=Gallus gallus OX=9031 GN=MV	NaN	19.3786	2	93.821	0	82.63	28628000
F1NED5;O93257;A0A1D5PKF7	tr|F1NED5|F1NED5_CHICK ATP-dependent DNA helicase 2 subunit 1 OS=Gallus gallus OX=9031 GN=XRCC6 PE=3 SV=3;sp|O93257|XRCC6_CHICK X-ray repair cross-complementing protein 5 OS=Gallus gallus OX=9031 GN=XRCC6 PE=2 SV=1;tr|A0A1D5PKF7|A0A1D5PKF7_CHICK ATP-depend	NaN	21.7786	4	70.47	0	26.354	118720000
A0A1D5PKH3	tr|A0A1D5PKH3|A0A1D5PKH3_CHICK Uncharacterized protein OS=Gallus gallus OX=9031 GN=GRSF1 PE=4 SV=2	NaN	26.0223	14	52.103	0	256.5	1635700000
A0A1D5PMY4;A0A1D5PKH7	tr|A0A1D5PMY4|A0A1D5PMY4_CHICK Alanine--tRNA ligase OS=Gallus gallus OX=9031 GN=AARS2 PE=3 SV=2;tr|A0A1D5PKH7|A0A1D5PKH7_CHICK Alanine--tRNA ligase OS=Gallus gallus OX=9031 GN=AARS2 PE=3 SV=2	NaN	16.3149	2	104.42	0	13.141	4157600
A0A1D5PKI0	tr|A0A1D5PKI0|A0A1D5PKI0_CHICK H1.10 linker histone OS=Gallus gallus OX=9031 PE=3 SV=2	NaN	25.725	8	22.541	0	127.67	610100000
A0A1D5PKI8;F1NAU1	tr|A0A1D5PKI8|A0A1D5PKI8_CHICK Uncharacterized protein OS=Gallus gallus OX=9031 GN=GPC4 PE=3 SV=2;tr|F1NAU1|F1NAU1_CHICK Uncharacterized protein OS=Gallus gallus OX=9031 GN=GPC4 PE=3 SV=4	NaN	23.0685	4	63.086	0	31.148	228700000
F1N914;A0A1D5PKK0;A0A1D5NXW6	tr|F1N914|F1N914_CHICK Pyrroline-5-carboxylate reductase OS=Gallus gallus OX=9031 GN=PYCR1 PE=3 SV=4;tr|A0A1D5PKK0|A0A1D5PKK0_CHICK Pyrroline-5-carboxylate reductase OS=Gallus gallus OX=9031 GN=PYCR1 PE=3 SV=2;tr|A0A1D5NXW6|A0A1D5NXW6_CHICK Pyrroline-5-car	NaN	25.5226	8	32.954	0	91.576	819430000
A0A1D5PKK3	tr|A0A1D5PKK3|A0A1D5PKK3_CHICK Uncharacterized protein OS=Gallus gallus OX=9031 GN=MRPL53 PE=3 SV=1	NaN	21.13	1	12.159	0	11.683	11474000
A0A1D5PKL9	tr|A0A1D5PKL9|A0A1D5PKL9_CHICK Integrin_alpha2 domain-containing protein OS=Gallus gallus OX=9031 GN=ITGA4 PE=3 SV=1	NaN	16.6191	1	113.97	0.00044346	7.7149	4026400
A0A1L1RQP3;A0A1D5PWR3;A0A3Q2UEM6;A0A3Q2U5Y0;A0A3Q2U010;A0A1D5PKM2	tr|A0A1L1RQP3|A0A1L1RQP3_CHICK Uncharacterized protein OS=Gallus gallus OX=9031 GN=LOC100858664 PE=3 SV=1;tr|A0A1D5PWR3|A0A1D5PWR3_CHICK Uncharacterized protein OS=Gallus gallus OX=9031 GN=LOC420807 PE=3 SV=1;tr|A0A3Q2UEM6|A0A3Q2UEM6_CHICK Uncharacterized	NaN	20.6449	1	35.775	0	19.022	19675000
A0A1D5PKN8	tr|A0A1D5PKN8|A0A1D5PKN8_CHICK Uncharacterized protein OS=Gallus gallus OX=9031 GN=MPST PE=4 SV=1	NaN	22.1393	3	33.222	0	18.622	83150000
A0A1D5PKP4;A0A3Q3AZC4;A0A3Q2UB71;A0A1D5P3D4;A0A1D5PII0	tr|A0A1D5PKP4|A0A1D5PKP4_CHICK Uncharacterized protein OS=Gallus gallus OX=9031 GN=STRIP1 PE=3 SV=2;tr|A0A3Q3AZC4|A0A3Q3AZC4_CHICK Uncharacterized protein OS=Gallus gallus OX=9031 GN=STRIP1 PE=3 SV=1;tr|A0A3Q2UB71|A0A3Q2UB71_CHICK Uncharacterized protein O	NaN	19.3611	2	93.424	0	12.892	26263000
A0A1D5PKP7;A0A1D5PY85;F1NB38;H9L0N9	tr|A0A1D5PKP7|A0A1D5PKP7_CHICK Ethylmalonyl-CoA decarboxylase OS=Gallus gallus OX=9031 GN=ECHDC1 PE=3 SV=1;tr|A0A1D5PY85|A0A1D5PY85_CHICK Ethylmalonyl-CoA decarboxylase OS=Gallus gallus OX=9031 GN=ECHDC1 PE=3 SV=1;sp|F1NB38|ECHD1_CHICK Ethylmalonyl-CoA dec	NaN	20.2806	1	19.114	0.003096	6.0841	14011000
A0A1D5PKQ1	tr|A0A1D5PKQ1|A0A1D5PKQ1_CHICK Queuine tRNA-ribosyltransferase catalytic subunit 1 OS=Gallus gallus OX=9031 GN=QTRT1 PE=3 SV=2	NaN	20.3788	1	43.364	0.00046147	8.7617	27268000
A0A1D5PKT3	tr|A0A1D5PKT3|A0A1D5PKT3_CHICK Uncharacterized protein OS=Gallus gallus OX=9031 GN=TOMM20 PE=3 SV=1	NaN	22.7441	1	16.418	0.0030948	6.0822	35125000
A0A1D5PL06;A0A3Q2U659	tr|A0A1D5PL06|A0A1D5PL06_CHICK RAP domain-containing protein OS=Gallus gallus OX=9031 GN=TBRG4 PE=4 SV=1;tr|A0A3Q2U659|A0A3Q2U659_CHICK RAP domain-containing protein OS=Gallus gallus OX=9031 GN=TBRG4 PE=4 SV=1	NaN	23.1399	9	71.396	0	75.799	277270000
A0A1D5PL07	tr|A0A1D5PL07|A0A1D5PL07_CHICK CUE domain-containing protein OS=Gallus gallus OX=9031 GN=AUP1 PE=4 SV=2	NaN	18.2666	1	44.618	0.00042845	7.2774	5360900
A0A1D5PL36	tr|A0A1D5PL36|A0A1D5PL36_CHICK Uncharacterized protein OS=Gallus gallus OX=9031 GN=ACAA2 PE=3 SV=2	NaN	26.7812	12	44.293	0	148.23	2306500000
A0A1L1RR71;A0A1D5PL38	tr|A0A1L1RR71|A0A1L1RR71_CHICK Delta-1-pyrroline-5-carboxylate synthase OS=Gallus gallus OX=9031 GN=ALDH18A1 PE=3 SV=1;tr|A0A1D5PL38|A0A1D5PL38_CHICK Delta-1-pyrroline-5-carboxylate synthase OS=Gallus gallus OX=9031 GN=ALDH18A1 PE=3 SV=2	NaN	21.6786	8	87.386	0	70.676	151050000
Q5ZJL5;A0A1D5PL45;F1NS23	sp|Q5ZJL5|PURA2_CHICK Adenylosuccinate synthetase isozyme 2 OS=Gallus gallus OX=9031 GN=ADSS2 PE=2 SV=1;tr|A0A1D5PL45|A0A1D5PL45_CHICK Adenylosuccinate synthetase isozyme 2 OS=Gallus gallus OX=9031 GN=ADSS PE=3 SV=1;tr|F1NS23|F1NS23_CHICK Adenylosuccinate	NaN	21.2638	4	49.454	0	39.595	52875000
A0A1D5PL53	tr|A0A1D5PL53|A0A1D5PL53_CHICK Thioredoxin-disulfide reductase OS=Gallus gallus OX=9031 GN=TXNRD3 PE=3 SV=1	NaN	21.3843	4	66.4	0	27.646	93066000
F1NCA4;A0A3Q2UC20;A0A1D5PL64;A0A3Q2U0L1;A0A1D5PMS0;A0A3Q3AHJ0	tr|F1NCA4|F1NCA4_CHICK RNA binding protein fox-1 homolog 2 OS=Gallus gallus OX=9031 GN=RBFOX2 PE=4 SV=3;tr|A0A3Q2UC20|A0A3Q2UC20_CHICK RNA binding protein fox-1 homolog 1 OS=Gallus gallus OX=9031 GN=RBFOX1 PE=4 SV=1;tr|A0A1D5PL64|A0A1D5PL64_CHICK RNA bindi	NaN	21.4242	2	39.502	0	28.605	30955000
A0A1D5PL70	tr|A0A1D5PL70|A0A1D5PL70_CHICK Uncharacterized protein OS=Gallus gallus OX=9031 GN=MCAM PE=4 SV=2	NaN	22.0682	5	69.001	0	36.502	145110000
A0A1D5PLE8	tr|A0A1D5PLE8|A0A1D5PLE8_CHICK Uncharacterized protein OS=Gallus gallus OX=9031 GN=METTL15P1 PE=3 SV=1	NaN	20.3761	1	45.503	0.00042918	7.2821	24496000
A0A1D5PLG0;A0A3Q2TVR5;A0A3Q3AL01	tr|A0A1D5PLG0|A0A1D5PLG0_CHICK EXOSC1 domain-containing protein OS=Gallus gallus OX=9031 GN=EXOSC1 PE=4 SV=1;tr|A0A3Q2TVR5|A0A3Q2TVR5_CHICK S1 domain-containing protein OS=Gallus gallus OX=9031 GN=EXOSC1 PE=4 SV=1;tr|A0A3Q3AL01|A0A3Q3AL01_CHICK Uncharacter	NaN	22.8127	3	15.575	0	18.389	51570000
A0A1D5PLH4	tr|A0A1D5PLH4|A0A1D5PLH4_CHICK Nucleoplasmin domain-containing protein OS=Gallus gallus OX=9031 GN=NPM3 PE=3 SV=1	NaN	27.6489	5	16.367	0	74.028	1683600000
F1NNS8;A0A1D5PLH7	tr|F1NNS8|F1NNS8_CHICK Thioredoxin domain-containing protein OS=Gallus gallus OX=9031 GN=PRDX4 PE=4 SV=3;tr|A0A1D5PLH7|A0A1D5PLH7_CHICK Peroxiredoxin 4 OS=Gallus gallus OX=9031 GN=PRDX4 PE=4 SV=2	NaN	25.5135	8	29.634	0	85.721	814280000
A0A1L1RNV4;Q5ZJC8;A0A1D5PLI3	tr|A0A1L1RNV4|A0A1L1RNV4_CHICK Transcription termination factor 3, mitochondrial OS=Gallus gallus OX=9031 GN=MTERF3 PE=3 SV=2;sp|Q5ZJC8|MTEF3_CHICK Transcription termination factor 3, mitochondrial OS=Gallus gallus OX=9031 GN=MTERF3 PE=2 SV=1;tr|A0A1D5PLI3	NaN	21.5809	3	43.236	0	18.756	72149000
A0A1D5PLK6	tr|A0A1D5PLK6|A0A1D5PLK6_CHICK BRO1 domain-containing protein OS=Gallus gallus OX=9031 GN=PDCD6IP PE=4 SV=1	NaN	22.0315	6	97.44	0	55.314	205770000
A0A1D5PLP1;A0A1D5PMH5;A0A1L1RNL6	tr|A0A1D5PLP1|A0A1D5PLP1_CHICK NAC-A/B domain-containing protein OS=Gallus gallus OX=9031 GN=NACA PE=4 SV=1;tr|A0A1D5PMH5|A0A1D5PMH5_CHICK NAC-A/B domain-containing protein OS=Gallus gallus OX=9031 GN=NACA PE=4 SV=2;tr|A0A1L1RNL6|A0A1L1RNL6_CHICK NAC-A/B d	NaN	26.8467	4	24.873	0	135.25	724150000
A0A1D5PLQ2	tr|A0A1D5PLQ2|A0A1D5PLQ2_CHICK Fip1 domain-containing protein OS=Gallus gallus OX=9031 PE=3 SV=2	NaN	19.8213	1	20.014	0.0060744	5.9297	10190000
A0A1D5PLS2	tr|A0A1D5PLS2|A0A1D5PLS2_CHICK Citrate synthase OS=Gallus gallus OX=9031 GN=CS PE=3 SV=2	NaN	28.2212	19	52.056	0	233.72	5945500000
A0A1D5PLU6	tr|A0A1D5PLU6|A0A1D5PLU6_CHICK Uncharacterized protein OS=Gallus gallus OX=9031 GN=ZW10 PE=3 SV=1	NaN	20.1395	1	88.564	0.00045704	8.3247	48512000
A0A1D5PLV9;F1NIW6;A0A1D5NX84	tr|A0A1D5PLV9|A0A1D5PLV9_CHICK Uncharacterized protein OS=Gallus gallus OX=9031 GN=TRABD PE=4 SV=2;tr|F1NIW6|F1NIW6_CHICK Uncharacterized protein OS=Gallus gallus OX=9031 GN=TRABD PE=4 SV=1;tr|A0A1D5NX84|A0A1D5NX84_CHICK Uncharacterized protein OS=Gallus g	NaN	20.376	2	37.924	0	24.846	20412000
A0A1D5PLX0;A0A1L1RZW9;E1C7T8	tr|A0A1D5PLX0|A0A1D5PLX0_CHICK Coatomer subunit gamma OS=Gallus gallus OX=9031 GN=COPG2 PE=3 SV=2;tr|A0A1L1RZW9|A0A1L1RZW9_CHICK Coatomer subunit gamma OS=Gallus gallus OX=9031 GN=COPG2 PE=3 SV=2;tr|E1C7T8|E1C7T8_CHICK Coatomer subunit gamma OS=Gallus gall	NaN	22.2002	9	97.557	0	101.39	226470000
A0A1D5PM19;P14105	tr|A0A1D5PM19|A0A1D5PM19_CHICK Myosin-9 OS=Gallus gallus OX=9031 GN=MYH9 PE=3 SV=2;sp|P14105|MYH9_CHICK Myosin-9 OS=Gallus gallus OX=9031 GN=MYH9 PE=2 SV=1	26.2147	20.5078	45	226.63	0	323.31	8175100000
A0A1D5PM21;Q5ZMJ9;E1BQL2;A0A3Q2TSY7;A0A1D5PQY8	tr|A0A1D5PM21|A0A1D5PM21_CHICK Serine/arginine repetitive matrix protein 1 OS=Gallus gallus OX=9031 GN=SRRM1 PE=4 SV=2;sp|Q5ZMJ9|SRRM1_CHICK Serine/arginine repetitive matrix protein 1 OS=Gallus gallus OX=9031 GN=SRRM1 PE=2 SV=1;tr|E1BQL2|E1BQL2_CHICK Seri	NaN	19.5508	1	98.932	0.0023539	6.2059	29953000
F1NQ08;A0A1D5PM29	tr|F1NQ08|F1NQ08_CHICK Protein MTO1 homolog, mitochondrial OS=Gallus gallus OX=9031 GN=MTO1 PE=3 SV=3;tr|A0A1D5PM29|A0A1D5PM29_CHICK Protein MTO1 homolog, mitochondrial OS=Gallus gallus OX=9031 GN=MTO1 PE=3 SV=2	23.9795	17.9444	2	71.772	0	11.703	604500000
A0A1D5PM40;A0A3Q3AUL4	tr|A0A1D5PM40|A0A1D5PM40_CHICK Uncharacterized protein OS=Gallus gallus OX=9031 GN=RHEB PE=4 SV=2;tr|A0A3Q3AUL4|A0A3Q3AUL4_CHICK Uncharacterized protein OS=Gallus gallus OX=9031 GN=RHEB PE=4 SV=1	NaN	21.4955	1	18.792	0.00084211	7.0379	23653000
A0A1D5PM49	tr|A0A1D5PM49|A0A1D5PM49_CHICK Chondroitinsulfatase OS=Gallus gallus OX=9031 PE=3 SV=2	NaN	19.0704	1	57.283	0.0008489	7.1369	13212000
A0A1D5PM61;A0A3Q2TZF7	tr|A0A1D5PM61|A0A1D5PM61_CHICK Uncharacterized protein OS=Gallus gallus OX=9031 GN=MTA2 PE=4 SV=2;tr|A0A3Q2TZF7|A0A3Q2TZF7_CHICK Uncharacterized protein OS=Gallus gallus OX=9031 GN=MTA2 PE=4 SV=1	NaN	22.008	5	60.883	0	56.359	143390000
A0A1D5PM72	tr|A0A1D5PM72|A0A1D5PM72_CHICK Uncharacterized protein OS=Gallus gallus OX=9031 GN=HSD17B12 PE=3 SV=2	NaN	23.0289	4	42.67	0	26.732	128380000
A0A1D5PM87	tr|A0A1D5PM87|A0A1D5PM87_CHICK Uncharacterized protein OS=Gallus gallus OX=9031 GN=RAD21 PE=3 SV=1	NaN	17.92	2	72.05	0	34.92	6448200
H9L0C0;A0A1D5PMH0	tr|H9L0C0|H9L0C0_CHICK Uncharacterized protein OS=Gallus gallus OX=9031 GN=VPS45 PE=3 SV=1;tr|A0A1D5PMH0|A0A1D5PMH0_CHICK Uncharacterized protein OS=Gallus gallus OX=9031 GN=VPS45 PE=3 SV=2	NaN	21.3134	2	42.876	0	11.141	57331000
Q5H7N8;A0A1D5PMI7	sp|Q5H7N8|ZC3HF_CHICK Zinc finger CCCH domain-containing protein 15 OS=Gallus gallus OX=9031 GN=ZC3H15 PE=1 SV=1;tr|A0A1D5PMI7|A0A1D5PMI7_CHICK Zinc finger CCCH domain-containing protein 15 OS=Gallus gallus OX=9031 GN=ZC3H15 PE=3 SV=1	NaN	23.0484	2	48.996	0	73.022	208200000
A0A1L1RNP9;A0A1D5PMM8;A0A1D5PN34	tr|A0A1L1RNP9|A0A1L1RNP9_CHICK Uncharacterized protein OS=Gallus gallus OX=9031 GN=ZNF207 PE=4 SV=1;tr|A0A1D5PMM8|A0A1D5PMM8_CHICK Uncharacterized protein OS=Gallus gallus OX=9031 GN=ZNF207 PE=4 SV=2;tr|A0A1D5PN34|A0A1D5PN34_CHICK Uncharacterized protein O	25.5379	23.5414	3	47.896	0	84.417	852940000
A0A1D5PMR8	tr|A0A1D5PMR8|A0A1D5PMR8_CHICK RRM domain-containing protein OS=Gallus gallus OX=9031 GN=CPSF7 PE=3 SV=2	NaN	21.6237	4	58.917	0	28.306	71092000
A0A1D5PMT8	tr|A0A1D5PMT8|A0A1D5PMT8_CHICK Ribosomal protein lateral stalk subunit P2 OS=Gallus gallus OX=9031 GN=RPLP2 PE=3 SV=1	NaN	23.8327	1	11.842	0.0027301	6.1557	74698000
Q5ZMS2;A0A1D5PMU2;A0A3Q2UC12	sp|Q5ZMS2|PA1B2_CHICK Platelet-activating factor acetylhydrolase IB subunit beta OS=Gallus gallus OX=9031 GN=PAFAH1B2 PE=2 SV=1;tr|A0A1D5PMU2|A0A1D5PMU2_CHICK Platelet-activating factor acetylhydrolase IB subunit beta OS=Gallus gallus OX=9031 GN=PAFAH1B2 P	NaN	20.5254	1	25.567	0.001219	6.558	13583000
A0A1D5PMU3;F1NCL7	tr|A0A1D5PMU3|A0A1D5PMU3_CHICK TACC_C domain-containing protein OS=Gallus gallus OX=9031 GN=TACC3 PE=3 SV=2;tr|F1NCL7|F1NCL7_CHICK TACC_C domain-containing protein OS=Gallus gallus OX=9031 GN=TACC3 PE=3 SV=3	NaN	21.3467	3	93.467	0	41.01	112010000
A0A1D5PN05	tr|A0A1D5PN05|A0A1D5PN05_CHICK COX6C domain-containing protein OS=Gallus gallus OX=9031 GN=COX6C PE=3 SV=1	NaN	24.9061	2	8.7914	0	13.273	157200000
A0A1D5PN07;A0A1D5PS30	tr|A0A1D5PN07|A0A1D5PN07_CHICK Rho GTPase activating protein 1 OS=Gallus gallus OX=9031 GN=ARHGAP1 PE=4 SV=1;tr|A0A1D5PS30|A0A1D5PS30_CHICK Uncharacterized protein OS=Gallus gallus OX=9031 GN=ARHGAP1 PE=4 SV=1	NaN	23.3625	4	50.4	0	44.214	301990000
Q06066;A0A1D5PN25	sp|Q06066|YBOX1_CHICK Y-box-binding protein 1 OS=Gallus gallus OX=9031 GN=YBX1 PE=2 SV=1;tr|A0A1D5PN25|A0A1D5PN25_CHICK Y-box-binding protein 1 OS=Gallus gallus OX=9031 GN=YBX1 PE=4 SV=1	NaN	28.2027	6	35.799	0	323.31	4016100000
A0A1D5PN32;A0A3Q2U8Y8	tr|A0A1D5PN32|A0A1D5PN32_CHICK Annexin OS=Gallus gallus OX=9031 GN=ANXA11 PE=3 SV=1;tr|A0A3Q2U8Y8|A0A3Q2U8Y8_CHICK Annexin OS=Gallus gallus OX=9031 GN=ANXA11 PE=3 SV=1	NaN	19.0495	3	52.687	0	18.143	11937000
A0A1L1RY35;A0A1D5PN54	tr|A0A1L1RY35|A0A1L1RY35_CHICK ATP synthase subunit alpha OS=Gallus gallus OX=9031 GN=ATP5A1Z PE=3 SV=2;tr|A0A1D5PN54|A0A1D5PN54_CHICK ATP synthase subunit alpha OS=Gallus gallus OX=9031 GN=ATP5A1Z PE=3 SV=1	21.3484	29.357	1	58.41	0	323.31	22088000000
A0A1D5PN56	tr|A0A1D5PN56|A0A1D5PN56_CHICK Uncharacterized protein OS=Gallus gallus OX=9031 GN=TOR1AIP1 PE=3 SV=3	NaN	21.3601	1	23.958	0	13.352	34994000
A0A1D5PN77;A0A3Q2UH18	tr|A0A1D5PN77|A0A1D5PN77_CHICK Probable cytosolic iron-sulfur protein assembly protein CIAO1 OS=Gallus gallus OX=9031 GN=CIAO1 PE=3 SV=2;tr|A0A3Q2UH18|A0A3Q2UH18_CHICK Probable cytosolic iron-sulfur protein assembly protein CIAO1 OS=Gallus gallus OX=9031 G	NaN	17.5457	1	47.749	0.00046816	9.3267	5165800
A0A1D5PN92;A0A3Q3AK34;A0A3Q2UDS3;A0A3Q2U4B8	tr|A0A1D5PN92|A0A1D5PN92_CHICK Uncharacterized protein OS=Gallus gallus OX=9031 GN=DLG3 PE=4 SV=2;tr|A0A3Q3AK34|A0A3Q3AK34_CHICK Uncharacterized protein OS=Gallus gallus OX=9031 GN=DLG3 PE=4 SV=1;tr|A0A3Q2UDS3|A0A3Q2UDS3_CHICK Uncharacterized protein OS=Ga	NaN	19.0956	1	91.073	0.00045126	8.0466	21288000
A0A1D5PN97	tr|A0A1D5PN97|A0A1D5PN97_CHICK Methylthioribose-1-phosphate isomerase OS=Gallus gallus OX=9031 GN=MRI1 PE=3 SV=2	NaN	23.4671	4	36.976	0	65.61	197130000
A0A3Q2U8D7;A0A1D5PNA3	tr|A0A3Q2U8D7|A0A3Q2U8D7_CHICK Endoplasmic reticulum junction formation protein lunapark OS=Gallus gallus OX=9031 GN=LNPK PE=3 SV=1;tr|A0A1D5PNA3|A0A1D5PNA3_CHICK Endoplasmic reticulum junction formation protein lunapark OS=Gallus gallus OX=9031 GN=LNPK PE	NaN	20.426	2	47.229	0	22.027	32401000
A0A1D5PU55;A0A1D5PNA9	tr|A0A1D5PU55|A0A1D5PU55_CHICK Uncharacterized protein OS=Gallus gallus OX=9031 GN=GOLT1B PE=4 SV=2;tr|A0A1D5PNA9|A0A1D5PNA9_CHICK Uncharacterized protein OS=Gallus gallus OX=9031 GN=GOLT1B PE=4 SV=2	NaN	21.7885	1	14.18	0.0064103	5.8814	18111000
A0A1D5PNC5;A0A1D5PYF5;A0A3Q2U9K5;E1BW06	tr|A0A1D5PNC5|A0A1D5PNC5_CHICK ACB domain-containing protein OS=Gallus gallus OX=9031 GN=ECI2 PE=4 SV=2;tr|A0A1D5PYF5|A0A1D5PYF5_CHICK ACB domain-containing protein OS=Gallus gallus OX=9031 GN=ECI2 PE=4 SV=2;tr|A0A3Q2U9K5|A0A3Q2U9K5_CHICK ACB domain-contai	NaN	22.0601	4	39.939	0	27.5	78707000
A0A1D5PNG3	tr|A0A1D5PNG3|A0A1D5PNG3_CHICK Eukaryotic translation initiation factor 6 OS=Gallus gallus OX=9031 GN=EIF6 PE=3 SV=1	NaN	23.6199	4	26.525	0	40.179	116020000
A0A1D5PNH0	tr|A0A1D5PNH0|A0A1D5PNH0_CHICK PKS_ER domain-containing protein OS=Gallus gallus OX=9031 GN=MECR PE=4 SV=2	NaN	17.5582	1	48.766	0.00084782	7.1279	3860100
A0A1D5PNK3	tr|A0A1D5PNK3|A0A1D5PNK3_CHICK Uncharacterized protein OS=Gallus gallus OX=9031 GN=SLC25A11 PE=3 SV=2	NaN	24.9538	8	33.165	0	161.69	584950000
A0A3Q2UEL0;A0A1D5PNL3;A0A1L1RY95	tr|A0A3Q2UEL0|A0A3Q2UEL0_CHICK UBC core domain-containing protein OS=Gallus gallus OX=9031 GN=UBE2N PE=3 SV=1;tr|A0A1D5PNL3|A0A1D5PNL3_CHICK UBC core domain-containing protein OS=Gallus gallus OX=9031 GN=UBE2N PE=3 SV=1;tr|A0A1L1RY95|A0A1L1RY95_CHICK UBC c	NaN	26.4919	3	11.983	0	25.492	660630000
A0A1D5PNM0	tr|A0A1D5PNM0|A0A1D5PNM0_CHICK Complex I-B22 OS=Gallus gallus OX=9031 GN=NDUFB9 PE=3 SV=1	NaN	24.8139	6	21.327	0	42.374	265430000
A0A1D5PNR0	tr|A0A1D5PNR0|A0A1D5PNR0_CHICK RNA-binding protein 8A OS=Gallus gallus OX=9031 GN=RBM8A PE=3 SV=2	24.9565	26.0177	2	18.431	0	33.581	803950000
A0A1D5PNU2	tr|A0A1D5PNU2|A0A1D5PNU2_CHICK Apolipoprotein H OS=Gallus gallus OX=9031 GN=APOH PE=4 SV=1	NaN	19.2981	1	41.093	0	15.878	12893000
A0A1L1RIQ6;A0A1D5PNV6;F1NNQ3;Q5ZIL2	tr|A0A1L1RIQ6|A0A1L1RIQ6_CHICK Vacuolar protein sorting-associated protein 29 OS=Gallus gallus OX=9031 GN=VPS29 PE=3 SV=1;tr|A0A1D5PNV6|A0A1D5PNV6_CHICK Vacuolar protein sorting-associated protein 29 OS=Gallus gallus OX=9031 GN=VPS29 PE=3 SV=2;tr|F1NNQ3|F1	NaN	23.1774	1	20.517	0	56.772	94862000
Q5ZKM1;A0A1D5PNW7	sp|Q5ZKM1|SPB1_CHICK pre-rRNA 2-O-ribose RNA methyltransferase FTSJ3 OS=Gallus gallus OX=9031 GN=FTSJ3 PE=2 SV=2;tr|A0A1D5PNW7|A0A1D5PNW7_CHICK pre-rRNA processing protein FTSJ3 OS=Gallus gallus OX=9031 GN=FTSJ3 PE=3 SV=1	NaN	22.0563	4	95.005	0	72.649	126480000
A0A1D5PNX4	tr|A0A1D5PNX4|A0A1D5PNX4_CHICK Uncharacterized protein OS=Gallus gallus OX=9031 GN=RABL6 PE=4 SV=2	NaN	19.1709	1	78.032	0.00082542	6.78	17117000
A0A1D5PP40	tr|A0A1D5PP40|A0A1D5PP40_CHICK Uncharacterized protein OS=Gallus gallus OX=9031 GN=SLC25A14 PE=3 SV=2	NaN	21.2121	1	52.886	0.00084069	7.0062	68022000
Q5ZI04;A0A3Q2ULP7;E1C8F4;A0A3Q2TTC4;A0A1D5PZ00;A0A1D5PP47;A0A1D5PZI5	sp|Q5ZI04|CYRIA_CHICK CYFIP-related Rac1 interactor A OS=Gallus gallus OX=9031 GN=CYRIA PE=2 SV=1;tr|A0A3Q2ULP7|A0A3Q2ULP7_CHICK DUF1394 domain-containing protein OS=Gallus gallus OX=9031 GN=LOC419677 PE=3 SV=1;tr|E1C8F4|E1C8F4_CHICK DUF1394 domain-contain	NaN	19.3288	1	37.313	0.00045517	8.2023	11852000
A0A1D5PP57;P49712;A0A3Q2U7V8	tr|A0A1D5PP57|A0A1D5PP57_CHICK Vacuolar proton pump subunit B OS=Gallus gallus OX=9031 GN=ATP6V1B2 PE=3 SV=2;sp|P49712|VATB_CHICK V-type proton ATPase subunit B OS=Gallus gallus OX=9031 GN=ATP6V1B PE=3 SV=1;tr|A0A3Q2U7V8|A0A3Q2U7V8_CHICK Vacuolar proton pu	NaN	22.9835	6	55.635	0	75.867	215620000
A0A1D5PP82	tr|A0A1D5PP82|A0A1D5PP82_CHICK Uncharacterized protein OS=Gallus gallus OX=9031 GN=LOC107050474 PE=4 SV=2	NaN	22.7015	7	90.242	0	117.33	306930000
A0A1D5PPA8;A0A1D5NWI2;A0A1D5PNB8	tr|A0A1D5PPA8|A0A1D5PPA8_CHICK AdoHcyase_NAD domain-containing protein OS=Gallus gallus OX=9031 GN=AHCY PE=3 SV=1;tr|A0A1D5NWI2|A0A1D5NWI2_CHICK AdoHcyase_NAD domain-containing protein OS=Gallus gallus OX=9031 GN=AHCY PE=3 SV=2;tr|A0A1D5PNB8|A0A1D5PNB8_CHI	NaN	25.5056	11	47.735	0	137.34	1048000000
Q6U7I1;A0A1D5PPD3	sp|Q6U7I1|UBP7_CHICK Ubiquitin carboxyl-terminal hydrolase 7 OS=Gallus gallus OX=9031 GN=USP7 PE=2 SV=1;tr|A0A1D5PPD3|A0A1D5PPD3_CHICK Ubiquitin carboxyl-terminal hydrolase 7 OS=Gallus gallus OX=9031 GN=USP7 PE=3 SV=1	NaN	19.3737	2	128.3	0.0004787	10.559	43476000
A0A1D5PPF8	tr|A0A1D5PPF8|A0A1D5PPF8_CHICK Heat shock 70 kDa protein 4 OS=Gallus gallus OX=9031 GN=HSPA4 PE=3 SV=1	NaN	24.3788	16	94.239	0	315.24	1134400000
A0A1D5PPG9	tr|A0A1D5PPG9|A0A1D5PPG9_CHICK Reticulon OS=Gallus gallus OX=9031 GN=RTN4 PE=4 SV=3	NaN	21.0911	3	127	0	26.785	129560000
Q5F375;Q5ZMA7;A0A1D5PPH4	tr|Q5F375|Q5F375_CHICK Protein kinase domain-containing protein OS=Gallus gallus OX=9031 GN=STK24 PE=2 SV=1;tr|Q5ZMA7|Q5ZMA7_CHICK Protein kinase domain-containing protein OS=Gallus gallus OX=9031 GN=STK26 PE=2 SV=1;tr|A0A1D5PPH4|A0A1D5PPH4_CHICK Protein k	NaN	19.8538	1	36.965	0	29.884	16108000
A0A1D5PPJ3	tr|A0A1D5PPJ3|A0A1D5PPJ3_CHICK Importin N-terminal domain-containing protein OS=Gallus gallus OX=9031 GN=IPO8 PE=4 SV=3	NaN	17.7541	1	120.15	0.0004662	9.1449	10390000
A0A1D5PPL7;A0A1D5PG30	tr|A0A1D5PPL7|A0A1D5PPL7_CHICK Eukaryotic translation elongation factor 1 delta OS=Gallus gallus OX=9031 GN=EEF1D PE=3 SV=3;tr|A0A1D5PG30|A0A1D5PG30_CHICK Uncharacterized protein OS=Gallus gallus OX=9031 GN=EEF1D PE=3 SV=2	23.5571	28.0363	8	32.325	0	242.61	4026700000
A0A1D5PPM7	tr|A0A1D5PPM7|A0A1D5PPM7_CHICK SURF6 domain-containing protein OS=Gallus gallus OX=9031 GN=SURF6 PE=3 SV=2	NaN	20.0542	2	41.675	0	48.811	17419000
P08110;A0A1D5PPN9	sp|P08110|ENPL_CHICK Endoplasmin OS=Gallus gallus OX=9031 GN=HSP90B1 PE=1 SV=1;tr|A0A1D5PPN9|A0A1D5PPN9_CHICK Endoplasmin OS=Gallus gallus OX=9031 GN=HSP90B1 PE=3 SV=1	NaN	28.5065	32	91.554	0	323.31	14491000000
A0A1D5PPP7;F1NEL6	tr|A0A1D5PPP7|A0A1D5PPP7_CHICK Uncharacterized protein OS=Gallus gallus OX=9031 GN=CASP6 PE=3 SV=2;tr|F1NEL6|F1NEL6_CHICK Uncharacterized protein OS=Gallus gallus OX=9031 GN=CASP6 PE=3 SV=2	NaN	19.1805	1	34.476	0.00083612	6.9168	7724300
A0A1D5PPQ7;A0A3Q2TU97	tr|A0A1D5PPQ7|A0A1D5PPQ7_CHICK Uncharacterized protein OS=Gallus gallus OX=9031 GN=EIF4E PE=3 SV=1;tr|A0A3Q2TU97|A0A3Q2TU97_CHICK Uncharacterized protein OS=Gallus gallus OX=9031 GN=EIF4E PE=3 SV=1	NaN	24.7946	3	25.044	0	30.755	320110000
A0A1D5PPU2;F1NR57	tr|A0A1D5PPU2|A0A1D5PPU2_CHICK Uncharacterized protein OS=Gallus gallus OX=9031 GN=SLC12A2 PE=3 SV=1;tr|F1NR57|F1NR57_CHICK Uncharacterized protein OS=Gallus gallus OX=9031 GN=SLC12A2 PE=3 SV=2	NaN	17.6612	2	124.45	0	11.163	9120400
A0A1D5PPU9;A0A1L1RX38	tr|A0A1D5PPU9|A0A1D5PPU9_CHICK Catalase OS=Gallus gallus OX=9031 GN=CAT PE=3 SV=2;tr|A0A1L1RX38|A0A1L1RX38_CHICK Catalase OS=Gallus gallus OX=9031 GN=CAT PE=3 SV=1	20.5472	25.3773	14	59.614	0	231.51	1353500000
A0A1D5PPX8	tr|A0A1D5PPX8|A0A1D5PPX8_CHICK DGCR8 microprocessor complex subunit OS=Gallus gallus OX=9031 PE=4 SV=1	NaN	20.2661	2	87.395	0	19.714	42874000
Q5ZLJ4;A0A1D5PQ60	sp|Q5ZLJ4|TMM70_CHICK Transmembrane protein 70, mitochondrial OS=Gallus gallus OX=9031 GN=TMEM70 PE=2 SV=1;tr|A0A1D5PQ60|A0A1D5PQ60_CHICK Transmembrane protein 70, mitochondrial OS=Gallus gallus OX=9031 GN=TMEM70 PE=3 SV=1	NaN	18.98	1	27.432	0	22.032	5687600
A0A1D5PQ66	tr|A0A1D5PQ66|A0A1D5PQ66_CHICK Uncharacterized protein OS=Gallus gallus OX=9031 GN=RBM10 PE=3 SV=1	NaN	18.9203	1	104.87	0.0064006	5.8641	17364000
A0A1D5PQ74	tr|A0A1D5PQ74|A0A1D5PQ74_CHICK mRNA_decap_C domain-containing protein OS=Gallus gallus OX=9031 GN=DCP1A PE=3 SV=2	NaN	19.6294	1	64.28	0.00046404	8.9513	22710000
A0A1D5PQ96;Q5ZLI9;A0A1D5PH80	tr|A0A1D5PQ96|A0A1D5PQ96_CHICK 3-hydroxyisobutyrate dehydrogenase OS=Gallus gallus OX=9031 GN=HIBADH PE=3 SV=2;tr|Q5ZLI9|Q5ZLI9_CHICK 3-hydroxyisobutyrate dehydrogenase OS=Gallus gallus OX=9031 GN=HIBADH PE=2 SV=1;tr|A0A1D5PH80|A0A1D5PH80_CHICK 3-hydroxyis	NaN	24.6243	7	31.781	0	104.96	336190000
A0A3Q2UCJ8;A0A3Q2UJT7;A0A3Q2UN82;A0A3Q2UCR2;A0A3Q2UDS9;A0A1D5PQC1;A0A3Q2U0X1	tr|A0A3Q2UCJ8|A0A3Q2UCJ8_CHICK Uncharacterized protein OS=Gallus gallus OX=9031 GN=ARVCF PE=3 SV=1;tr|A0A3Q2UJT7|A0A3Q2UJT7_CHICK Uncharacterized protein OS=Gallus gallus OX=9031 GN=ARVCF PE=3 SV=1;tr|A0A3Q2UN82|A0A3Q2UN82_CHICK Uncharacterized protein OS=	NaN	19.9292	3	99.25	0	19.582	40932000
A0A1D5PQE1;A0A1D5PUA5;A0A1L1RX17;F1NWA8	tr|A0A1D5PQE1|A0A1D5PQE1_CHICK Aspartyl aminopeptidase OS=Gallus gallus OX=9031 GN=DNPEP PE=3 SV=2;tr|A0A1D5PUA5|A0A1D5PUA5_CHICK Aspartyl aminopeptidase OS=Gallus gallus OX=9031 GN=DNPEP PE=3 SV=2;tr|A0A1L1RX17|A0A1L1RX17_CHICK Aspartyl aminopeptidase OS=	NaN	22.321	5	55.855	0	54.827	125750000
A0A1D5PQE8	tr|A0A1D5PQE8|A0A1D5PQE8_CHICK Uncharacterized protein OS=Gallus gallus OX=9031 GN=GNA13 PE=3 SV=2	NaN	20.6793	4	43.776	0	24.319	35262000
E1C2V9;A0A1D5PQF9	tr|E1C2V9|E1C2V9_CHICK Arf-GAP domain-containing protein OS=Gallus gallus OX=9031 GN=ARFGAP2 PE=4 SV=3;tr|A0A1D5PQF9|A0A1D5PQF9_CHICK Arf-GAP domain-containing protein OS=Gallus gallus OX=9031 GN=ARFGAP2 PE=4 SV=1	NaN	22.4156	5	57.362	0	114.87	162240000
A0A1D5PQL9	tr|A0A1D5PQL9|A0A1D5PQL9_CHICK Uncharacterized protein OS=Gallus gallus OX=9031 GN=FAM134A PE=4 SV=2	NaN	20.0274	1	60.227	0.00084567	7.0683	18167000
A0A1D5PQV3;F1NQH8;A0A1D5PK94	tr|A0A1D5PQV3|A0A1D5PQV3_CHICK Dihydrolipoyllysine-residue succinyltransferase component of 2-oxoglutarate dehydrogenase complex, mitochondrial OS=Gallus gallus OX=9031 GN=DLST PE=3 SV=2;tr|F1NQH8|F1NQH8_CHICK Dihydrolipoyllysine-residue succinyltransferas	NaN	26.0265	7	51.067	0	101.89	1435400000
A0A1D5PR32;A0A3Q2UDU3	tr|A0A1D5PR32|A0A1D5PR32_CHICK Heat shock 70 kDa protein 14 OS=Gallus gallus OX=9031 GN=HSPA14 PE=3 SV=2;tr|A0A3Q2UDU3|A0A3Q2UDU3_CHICK Heat shock 70 kDa protein 14 OS=Gallus gallus OX=9031 GN=HSPA14 PE=3 SV=1	NaN	17.5653	1	41.31	0.00084854	7.1303	3878900
A0A1D5PR40	tr|A0A1D5PR40|A0A1D5PR40_CHICK 60S ribosomal protein L17 OS=Gallus gallus OX=9031 GN=LOC107049046 PE=3 SV=1	NaN	26.3615	7	21.397	0	62.091	775950000
A0A1D5PR60	tr|A0A1D5PR60|A0A1D5PR60_CHICK Uncharacterized protein OS=Gallus gallus OX=9031 GN=MTDH PE=4 SV=2	NaN	23.9589	5	41.374	0	79.565	260900000
A0A1D5PRA5	tr|A0A1D5PRA5|A0A1D5PRA5_CHICK ANK_REP_REGION domain-containing protein OS=Gallus gallus OX=9031 GN=ANKRD46 PE=4 SV=1	NaN	22.1039	1	25.265	0.00084818	7.1296	31553000
A0A1D5PRB6	tr|A0A1D5PRB6|A0A1D5PRB6_CHICK Complex I-AGGG OS=Gallus gallus OX=9031 GN=NDUFB2 PE=3 SV=1	NaN	22.0531	1	10.906	0.0031092	6.1292	17406000
A0A3Q2U3K1;A0A1D5PRJ2;A0A3Q3A9F0;A0A1L1RLW9;A0A1L1RYC9;A0A3Q2UC96;A0A1D5PZL4;A0A3Q2TSU2;A0A3Q3ABZ7;A0A1D5NY54;A0A1D5PQ02;A0A3Q2UDW3;A0A3Q2TSX2;A0A1D5PHV0;E1BWY8;A0A3Q2U8I4;A0A1D5NVX3;A0A1D5PIF5;A0A3Q2U0Y9	tr|A0A3Q2U3K1|A0A3Q2U3K1_CHICK E3 ubiquitin-protein ligase OS=Gallus gallus OX=9031 GN=LOC107055431 PE=4 SV=1;tr|A0A1D5PRJ2|A0A1D5PRJ2_CHICK HECT-type E3 ubiquitin transferase OS=Gallus gallus OX=9031 GN=NEDD4L PE=4 SV=2;tr|A0A3Q3A9F0|A0A3Q3A9F0_CHICK E3 u	NaN	17.8685	2	101.16	0	25.968	10529000
A0A1D5PRK3	tr|A0A1D5PRK3|A0A1D5PRK3_CHICK Uncharacterized protein OS=Gallus gallus OX=9031 GN=MRPL13 PE=3 SV=1	NaN	24.2195	4	20.725	0	35.018	214870000
A0A1D5PRM3	tr|A0A1D5PRM3|A0A1D5PRM3_CHICK 39S ribosomal protein L9, mitochondrial OS=Gallus gallus OX=9031 GN=MRPL9 PE=3 SV=1	NaN	22.3008	3	27.911	0	48.116	72331000
A0A1D5PRN9;A0A3Q2UIT5	tr|A0A1D5PRN9|A0A1D5PRN9_CHICK Ribose-5-phosphate isomerase OS=Gallus gallus OX=9031 GN=RPIA PE=3 SV=2;tr|A0A3Q2UIT5|A0A3Q2UIT5_CHICK Ribose-5-phosphate isomerase OS=Gallus gallus OX=9031 GN=RPIA PE=3 SV=1	NaN	19.2215	1	35.951	0.006086	5.9439	11614000
A0A1D5PRQ5;Q90YH9	tr|A0A1D5PRQ5|A0A1D5PRQ5_CHICK Testin OS=Gallus gallus OX=9031 GN=TES PE=3 SV=1;sp|Q90YH9|TES_CHICK Testin OS=Gallus gallus OX=9031 GN=TES PE=2 SV=1	NaN	19.9941	2	47.146	0	13.629	27152000
A0A1D5PRS6;H9L0M5	tr|A0A1D5PRS6|A0A1D5PRS6_CHICK Uncharacterized protein OS=Gallus gallus OX=9031 GN=DAP3 PE=3 SV=1;tr|H9L0M5|H9L0M5_CHICK Uncharacterized protein OS=Gallus gallus OX=9031 GN=DAP3 PE=3 SV=4	NaN	23.6616	7	45.576	0	127.17	331710000
A0A1D5PRV6	tr|A0A1D5PRV6|A0A1D5PRV6_CHICK Uncharacterized protein OS=Gallus gallus OX=9031 GN=RPP40 PE=4 SV=2	NaN	20.1274	1	41.207	0	44.948	22907000
A0A1D5PRX6;F1NPW9	tr|A0A1D5PRX6|A0A1D5PRX6_CHICK SMK-1 domain-containing protein OS=Gallus gallus OX=9031 GN=PPP4R3B PE=3 SV=2;tr|F1NPW9|F1NPW9_CHICK SMK-1 domain-containing protein OS=Gallus gallus OX=9031 GN=PPP4R3A PE=3 SV=2	NaN	20.798	1	83.661	0.00043956	7.5774	60163000
F1NJ69;A0A1D5PRZ7	tr|F1NJ69|F1NJ69_CHICK General vesicular transport factor p115 OS=Gallus gallus OX=9031 GN=USO1 PE=3 SV=2;tr|A0A1D5PRZ7|A0A1D5PRZ7_CHICK General vesicular transport factor p115 OS=Gallus gallus OX=9031 GN=USO1 PE=3 SV=2	NaN	20.9049	3	106.13	0	58.676	80497000
A0A1D5PS16;O93277;F1NRI3	tr|A0A1D5PS16|A0A1D5PS16_CHICK WD repeat-containing protein 1 OS=Gallus gallus OX=9031 GN=WDR1 PE=4 SV=1;sp|O93277|WDR1_CHICK WD repeat-containing protein 1 OS=Gallus gallus OX=9031 GN=WDR1 PE=2 SV=1;tr|F1NRI3|F1NRI3_CHICK WD repeat-containing protein 1 OS	NaN	23.274	7	64.678	0	65.767	294130000
A0A1D5PS29;Q90705	tr|A0A1D5PS29|A0A1D5PS29_CHICK Elongation factor 2 OS=Gallus gallus OX=9031 GN=EEF2 PE=3 SV=1;sp|Q90705|EF2_CHICK Elongation factor 2 OS=Gallus gallus OX=9031 GN=EEF2 PE=1 SV=3	NaN	28.2112	25	95.359	0	244.7	13984000000
A0A1D5PS44	tr|A0A1D5PS44|A0A1D5PS44_CHICK Sulfatase domain-containing protein OS=Gallus gallus OX=9031 GN=ARSA PE=3 SV=1	NaN	21.2406	1	54.951	0.00604	5.8945	39644000
A0A1D5PS46;F1NDV3	tr|A0A1D5PS46|A0A1D5PS46_CHICK Uncharacterized protein OS=Gallus gallus OX=9031 GN=NUP133 PE=3 SV=2;tr|F1NDV3|F1NDV3_CHICK Uncharacterized protein OS=Gallus gallus OX=9031 GN=NUP133 PE=3 SV=4	NaN	20.0422	3	125.4	0	33.657	64782000
A0A1D5PS70	tr|A0A1D5PS70|A0A1D5PS70_CHICK PP28 domain-containing protein OS=Gallus gallus OX=9031 GN=PDAP1 PE=4 SV=2	NaN	23.7709	5	21.129	0	66.507	85884000
A0A1D5PS81;F1NWM9	tr|A0A1D5PS81|A0A1D5PS81_CHICK Uncharacterized protein OS=Gallus gallus OX=9031 GN=LSM14B PE=3 SV=2;tr|F1NWM9|F1NWM9_CHICK Uncharacterized protein OS=Gallus gallus OX=9031 GN=LSM14B PE=3 SV=3	NaN	18.2393	1	42.962	0.0074212	5.7705	4641600
F1NDK1;A0A3Q2UCI0;A0A1D5PSB8	tr|F1NDK1|F1NDK1_CHICK Protein kinase domain-containing protein OS=Gallus gallus OX=9031 GN=VRK1 PE=4 SV=1;tr|A0A3Q2UCI0|A0A3Q2UCI0_CHICK Protein kinase domain-containing protein OS=Gallus gallus OX=9031 GN=VRK1 PE=4 SV=1;tr|A0A1D5PSB8|A0A1D5PSB8_CHICK Pro	NaN	23.486	5	47.001	0	45.917	234980000
F1P269;A0A1D5PSE5	tr|F1P269|F1P269_CHICK ATP-citrate synthase OS=Gallus gallus OX=9031 GN=ACLY PE=3 SV=2;tr|A0A1D5PSE5|A0A1D5PSE5_CHICK ATP-citrate synthase OS=Gallus gallus OX=9031 GN=ACLY PE=3 SV=1	NaN	24.9099	25	120.14	0	323.31	1922800000
A0A1D5PSH3	tr|A0A1D5PSH3|A0A1D5PSH3_CHICK SWIB domain-containing protein OS=Gallus gallus OX=9031 GN=SMARCD1 PE=3 SV=1	NaN	20.2582	2	62.917	0	14.486	41386000
A0A1D5PSH8;A0A3Q2UMW7;E1C298	tr|A0A1D5PSH8|A0A1D5PSH8_CHICK Uncharacterized protein OS=Gallus gallus OX=9031 GN=B4GALT2 PE=3 SV=1;tr|A0A3Q2UMW7|A0A3Q2UMW7_CHICK Uncharacterized protein OS=Gallus gallus OX=9031 GN=B4GALT5 PE=3 SV=1;tr|E1C298|E1C298_CHICK Uncharacterized protein OS=Gall	NaN	17.7019	1	43.182	0.0074129	5.7625	4264200
Q5F4A4;A0A1D5PSI2	tr|Q5F4A4|Q5F4A4_CHICK Inosine-5-monophosphate dehydrogenase OS=Gallus gallus OX=9031 GN=IMPDH2 PE=2 SV=1;tr|A0A1D5PSI2|A0A1D5PSI2_CHICK Inosine-5-monophosphate dehydrogenase OS=Gallus gallus OX=9031 GN=IMPDH2 PE=3 SV=1	NaN	25.4845	15	55.558	0	197.99	1032800000
F1NBL6;A0A1D5PSL9	tr|F1NBL6|F1NBL6_CHICK Importin N-terminal domain-containing protein OS=Gallus gallus OX=9031 GN=XPO5 PE=4 SV=3;tr|A0A1D5PSL9|A0A1D5PSL9_CHICK Importin N-terminal domain-containing protein OS=Gallus gallus OX=9031 GN=XPO5 PE=4 SV=1	NaN	20.3732	4	136.7	0	81.732	86919000
A0A1D5PSP0	tr|A0A1D5PSP0|A0A1D5PSP0_CHICK Uncharacterized protein OS=Gallus gallus OX=9031 GN=SLC25A22 PE=3 SV=1	NaN	22.9289	3	34.774	0	25.375	143730000
Q5ZML4;A0A1D5PSQ9	sp|Q5ZML4|CHRD1_CHICK Cysteine and histidine-rich domain-containing protein 1 OS=Gallus gallus OX=9031 GN=CHORDC1 PE=2 SV=1;tr|A0A1D5PSQ9|A0A1D5PSQ9_CHICK Cysteine and histidine-rich domain-containing protein 1 OS=Gallus gallus OX=9031 GN=CHORDC1 PE=4 SV=1	NaN	21.0087	2	37.37	0	13.84	31648000
A0A1D5PSU1	tr|A0A1D5PSU1|A0A1D5PSU1_CHICK Protein kinase domain-containing protein OS=Gallus gallus OX=9031 GN=SRPK2 PE=4 SV=2	NaN	20.2789	2	77.995	0	16.175	38167000
A0A1D5PT30	tr|A0A1D5PT30|A0A1D5PT30_CHICK Ribosomal_S10 domain-containing protein OS=Gallus gallus OX=9031 GN=MRPL48 PE=4 SV=1	NaN	21.4988	1	23.874	0.00043497	7.4651	32596000
A0A1D5PT37;A0A3Q2U7C4	tr|A0A1D5PT37|A0A1D5PT37_CHICK Vacuolar protein sorting-associated protein 11 homolog OS=Gallus gallus OX=9031 GN=VPS11 PE=3 SV=1;tr|A0A3Q2U7C4|A0A3Q2U7C4_CHICK Vacuolar protein sorting-associated protein 11 homolog OS=Gallus gallus OX=9031 GN=VPS11 PE=3 S	NaN	14.7445	1	106.42	0.0023753	6.2841	1399900
A0A3Q2TVQ2;Q5ZKX1;A0A1D5PT47	tr|A0A3Q2TVQ2|A0A3Q2TVQ2_CHICK Charged multivesicular body protein 1b OS=Gallus gallus OX=9031 GN=CHMP1B PE=3 SV=1;sp|Q5ZKX1|CHM1B_CHICK Charged multivesicular body protein 1b OS=Gallus gallus OX=9031 GN=CHMP1B PE=2 SV=1;tr|A0A1D5PT47|A0A1D5PT47_CHICK Char	NaN	22.3161	2	20.74	0	11.342	41775000
F1NB02;A0A1D5PT58	tr|F1NB02|F1NB02_CHICK 40S ribosomal protein S8 OS=Gallus gallus OX=9031 GN=RPS8 PE=3 SV=3;tr|A0A1D5PT58|A0A1D5PT58_CHICK 40S ribosomal protein S8 OS=Gallus gallus OX=9031 GN=RPS8 PE=3 SV=2	NaN	28.8528	10	24.054	0	231.44	4363000000
Q5ZIF4;F1P3D9;A0A1D5PT81	tr|Q5ZIF4|Q5ZIF4_CHICK Uncharacterized protein OS=Gallus gallus OX=9031 GN=SLC25A13 PE=2 SV=1;tr|F1P3D9|F1P3D9_CHICK Uncharacterized protein OS=Gallus gallus OX=9031 GN=SLC25A13 PE=3 SV=4;tr|A0A1D5PT81|A0A1D5PT81_CHICK Uncharacterized protein OS=Gallus gal	NaN	23.1722	11	74.102	0	151.74	349730000
E1BW77;A0A1D5PTE5;F1NAW2	tr|E1BW77|E1BW77_CHICK Uncharacterized protein OS=Gallus gallus OX=9031 GN=CD2AP PE=4 SV=3;tr|A0A1D5PTE5|A0A1D5PTE5_CHICK Uncharacterized protein OS=Gallus gallus OX=9031 GN=CD2AP PE=4 SV=2;tr|F1NAW2|F1NAW2_CHICK Uncharacterized protein OS=Gallus gallus OX	NaN	20.3465	2	65.22	0	12.61	41331000
A0A1D5PTE8	tr|A0A1D5PTE8|A0A1D5PTE8_CHICK Glia maturation factor OS=Gallus gallus OX=9031 GN=GMFB PE=3 SV=2	NaN	18.0813	2	16.592	0	17.243	2496200
A0A1D5PTF4;A0A3Q3B025	tr|A0A1D5PTF4|A0A1D5PTF4_CHICK LIM zinc-binding domain-containing protein OS=Gallus gallus OX=9031 GN=LIMA1 PE=4 SV=2;tr|A0A3Q3B025|A0A3Q3B025_CHICK LIM zinc-binding domain-containing protein OS=Gallus gallus OX=9031 GN=LIMA1 PE=4 SV=1	NaN	21.2082	3	80.935	0	34.201	96914000
A0A1D5PTH2	tr|A0A1D5PTH2|A0A1D5PTH2_CHICK Uncharacterized protein OS=Gallus gallus OX=9031 GN=CYP20A1 PE=3 SV=2	NaN	22.477	5	52.427	0	119.3	175140000
A0A1D5PTI9	tr|A0A1D5PTI9|A0A1D5PTI9_CHICK Ubiquitin-protein ligase E3A OS=Gallus gallus OX=9031 GN=UBE3A PE=4 SV=1	NaN	17.8227	1	100.99	0.00042992	7.2901	8809500
Q5ZL42;A0A1D5PTM7;F1NM03	sp|Q5ZL42|BZW2_CHICK Basic leucine zipper and W2 domain-containing protein 2 OS=Gallus gallus OX=9031 GN=BZW2 PE=2 SV=1;tr|A0A1D5PTM7|A0A1D5PTM7_CHICK Basic leucine zipper and W2 domain-containing protein 2 OS=Gallus gallus OX=9031 GN=BZW2 PE=3 SV=2;tr|F1N	NaN	22.8096	4	47.842	0	25.076	198490000
A0A1D5PTN0;E1C494	tr|A0A1D5PTN0|A0A1D5PTN0_CHICK 60S ribosome subunit biogenesis protein NIP7 homolog OS=Gallus gallus OX=9031 GN=NIP7 PE=4 SV=1;tr|E1C494|E1C494_CHICK 60S ribosome subunit biogenesis protein NIP7 homolog OS=Gallus gallus OX=9031 GN=NIP7 PE=3 SV=3	NaN	20.7534	2	18.137	0	15.382	10605000
A0A1D5PTS2;A0A3Q3A771;R4GHM1	tr|A0A1D5PTS2|A0A1D5PTS2_CHICK CortBP2 domain-containing protein OS=Gallus gallus OX=9031 GN=CTTNBP2NL PE=4 SV=1;tr|A0A3Q3A771|A0A3Q3A771_CHICK Uncharacterized protein OS=Gallus gallus OX=9031 GN=CTTNBP2NL PE=4 SV=1;tr|R4GHM1|R4GHM1_CHICK CortBP2 domain-co	NaN	18.7389	1	69.404	0.00044366	7.7401	16625000
A0A1D5PTW0	tr|A0A1D5PTW0|A0A1D5PTW0_CHICK Tr-type G domain-containing protein OS=Gallus gallus OX=9031 GN=MTIF2 PE=3 SV=1	NaN	17.3225	1	81.493	0.00045025	8.0277	5736600
A0A1D5PTW3;A0A1D5PWW3	tr|A0A1D5PTW3|A0A1D5PTW3_CHICK Uncharacterized protein OS=Gallus gallus OX=9031 GN=HSD17B7 PE=4 SV=1;tr|A0A1D5PWW3|A0A1D5PWW3_CHICK Uncharacterized protein OS=Gallus gallus OX=9031 GN=HSD17B7 PE=4 SV=1	NaN	22.4533	2	33.832	0	41.19	103370000
A0A1D5PU01;Q92072	tr|A0A1D5PU01|A0A1D5PU01_CHICK DNA (cytosine-5)-methyltransferase OS=Gallus gallus OX=9031 GN=DNMT1 PE=3 SV=2;sp|Q92072|DNMT1_CHICK DNA (cytosine-5)-methyltransferase 1 OS=Gallus gallus OX=9031 GN=DNMT1 PE=1 SV=1	NaN	18.5041	1	159.45	0.0067568	5.8332	27882000
F1NWZ3;A0A1D5PU44	tr|F1NWZ3|F1NWZ3_CHICK Uncharacterized protein OS=Gallus gallus OX=9031 GN=NUFIP2 PE=4 SV=4;tr|A0A1D5PU44|A0A1D5PU44_CHICK Uncharacterized protein OS=Gallus gallus OX=9031 GN=NUFIP2 PE=4 SV=2	NaN	20.4602	1	69.7	0	16.046	37509000
A0A1D5PU56;Q6WNG8;A0A1D5PDS3;A0A1L1RW44	tr|A0A1D5PU56|A0A1D5PU56_CHICK Uncharacterized protein OS=Gallus gallus OX=9031 GN=HNRNPH2 PE=4 SV=2;tr|Q6WNG8|Q6WNG8_CHICK Heterogeneous nuclear ribonucleoprotein H1-like protein OS=Gallus gallus OX=9031 GN=HNRNPH2 PE=2 SV=1;tr|A0A1D5PDS3|A0A1D5PDS3_CHICK	23.6925	26.4373	2	53.076	0	309.07	1984100000
A0A1D5PU80;P09572	tr|A0A1D5PU80|A0A1D5PU80_CHICK Sodium/potassium-transporting ATPase subunit alpha OS=Gallus gallus OX=9031 GN=ATP1A1 PE=3 SV=1;sp|P09572|AT1A1_CHICK Sodium/potassium-transporting ATPase subunit alpha-1 OS=Gallus gallus OX=9031 GN=ATP1A1 PE=2 SV=1	NaN	24.8427	19	112.46	0	323.31	1384100000
F1P587;A0A1D5PU94	tr|F1P587|F1P587_CHICK Anaphylatoxin-like domain-containing protein OS=Gallus gallus OX=9031 GN=C4A PE=4 SV=3;tr|A0A1D5PU94|A0A1D5PU94_CHICK C4a anaphylatoxin OS=Gallus gallus OX=9031 GN=C4A PE=4 SV=1	NaN	17.7433	2	181.09	0	11.795	18431000
Q5ZJN4;A0A1D5PU96	sp|Q5ZJN4|UBP10_CHICK Ubiquitin carboxyl-terminal hydrolase 10 OS=Gallus gallus OX=9031 GN=USP10 PE=2 SV=1;tr|A0A1D5PU96|A0A1D5PU96_CHICK Ubiquitin carboxyl-terminal hydrolase OS=Gallus gallus OX=9031 GN=USP10 PE=3 SV=2	NaN	23.2535	7	86.555	0	51.084	340010000
A0A1D5PUD5	tr|A0A1D5PUD5|A0A1D5PUD5_CHICK Uncharacterized protein OS=Gallus gallus OX=9031 GN=NUP88 PE=4 SV=2	NaN	18.2469	1	77.629	0.00046189	8.79	10577000
A0A1D5PUE2	tr|A0A1D5PUE2|A0A1D5PUE2_CHICK Uncharacterized protein OS=Gallus gallus OX=9031 GN=UNC50 PE=3 SV=1	NaN	21.5583	1	30.29	1	-2	18529000
Q45KJ5;A0A1D5PUF5	sp|Q45KJ5|LN28A_CHICK Protein lin-28 homolog A OS=Gallus gallus OX=9031 GN=LIN28A PE=2 SV=2;tr|A0A1D5PUF5|A0A1D5PUF5_CHICK Protein lin-28 homolog A OS=Gallus gallus OX=9031 GN=LIN28A PE=3 SV=2	NaN	25.6531	5	22.089	0	323.31	633170000
A0A1D5PUF7	tr|A0A1D5PUF7|A0A1D5PUF7_CHICK GDP-4-keto-6-deoxy-D-mannose-3,5-epimerase-4-reductase OS=Gallus gallus OX=9031 GN=TSTA3 PE=3 SV=1	NaN	20.0263	1	36.429	0.00085251	7.1873	22426000
A0A1D5PUG6	tr|A0A1D5PUG6|A0A1D5PUG6_CHICK RNA helicase OS=Gallus gallus OX=9031 GN=DDX23 PE=4 SV=2	NaN	22.1547	8	95.147	0	49.506	205440000
A0A1D5PUI1;A0A3Q2TYF8	tr|A0A1D5PUI1|A0A1D5PUI1_CHICK Threonyl-tRNA synthetase OS=Gallus gallus OX=9031 GN=TARS2 PE=3 SV=2;tr|A0A3Q2TYF8|A0A3Q2TYF8_CHICK Threonyl-tRNA synthetase OS=Gallus gallus OX=9031 GN=TARS2 PE=3 SV=1	NaN	18.3973	3	77.563	0	17.267	14156000
A0A1D5PUI6	tr|A0A1D5PUI6|A0A1D5PUI6_CHICK Cytochrome c oxidase polypeptide Vb OS=Gallus gallus OX=9031 GN=LOC107049545 PE=3 SV=2	NaN	25.6601	3	13.984	0	19.678	424190000
P11501;A0A1D5PUL6;A0A1D5P5R0;A0A1L1RND0	sp|P11501|HS90A_CHICK Heat shock protein HSP 90-alpha OS=Gallus gallus OX=9031 GN=HSP90AA1 PE=3 SV=3;tr|A0A1D5PUL6|A0A1D5PUL6_CHICK Heat shock protein HSP 90-alpha OS=Gallus gallus OX=9031 GN=HSP90AA1 PE=3 SV=1;tr|A0A1D5P5R0|A0A1D5P5R0_CHICK Heat shock pro	NaN	29.3062	28	84.058	0	323.31	21905000000
A0A1D5PUL8	tr|A0A1D5PUL8|A0A1D5PUL8_CHICK Dihydrolipoamide acetyltransferase component of pyruvate dehydrogenase complex OS=Gallus gallus OX=9031 GN=PDHX PE=3 SV=2	NaN	22.0107	3	53.189	0	33.289	101410000
A0A1D5PUU2	tr|A0A1D5PUU2|A0A1D5PUU2_CHICK LisH domain-containing protein OS=Gallus gallus OX=9031 GN=NOLC1 PE=4 SV=2	NaN	20.9718	2	72.417	0	12.257	57586000
A0A1D5PV01;A0A1L1RKJ5	tr|A0A1D5PV01|A0A1D5PV01_CHICK Carboxypeptidase OS=Gallus gallus OX=9031 GN=CTSA PE=3 SV=2;tr|A0A1L1RKJ5|A0A1L1RKJ5_CHICK Carboxypeptidase OS=Gallus gallus OX=9031 GN=CTSA PE=3 SV=1	NaN	22.8437	3	50.492	0	22.561	112910000
A0A1D5PV06;P09102;A0A1L1RZP5	tr|A0A1D5PV06|A0A1D5PV06_CHICK Protein disulfide-isomerase OS=Gallus gallus OX=9031 GN=P4HB PE=3 SV=2;sp|P09102|PDIA1_CHICK Protein disulfide-isomerase OS=Gallus gallus OX=9031 GN=P4HB PE=1 SV=3;tr|A0A1L1RZP5|A0A1L1RZP5_CHICK Protein disulfide-isomerase OS	NaN	27.2388	25	57.475	0	323.31	5068200000
A0A1D5PV32	tr|A0A1D5PV32|A0A1D5PV32_CHICK GYF domain-containing protein OS=Gallus gallus OX=9031 GN=GIGYF2 PE=4 SV=2	NaN	18.3647	2	147.67	0	43.712	18564000
A0A3Q2UCF3;A0A1D5PV41;A0A3Q3AA40	tr|A0A3Q2UCF3|A0A3Q2UCF3_CHICK Eukaryotic translation initiation factor 3 subunit G OS=Gallus gallus OX=9031 GN=EIF3G PE=3 SV=1;tr|A0A1D5PV41|A0A1D5PV41_CHICK Eukaryotic translation initiation factor 3 subunit G OS=Gallus gallus OX=9031 GN=EIF3G PE=3 SV=2;	NaN	23.6676	5	33.647	0	90.874	266490000
A0A1D5PV90	tr|A0A1D5PV90|A0A1D5PV90_CHICK Ribosome biogenesis protein NOP53 OS=Gallus gallus OX=9031 GN=GLTSCR2 PE=3 SV=2	NaN	20.0641	3	68.173	0	32.547	27406000
A0A1D5PVA3	tr|A0A1D5PVA3|A0A1D5PVA3_CHICK Ribosome biogenesis protein RPF2 homolog OS=Gallus gallus OX=9031 GN=RPF2 PE=3 SV=1	NaN	21.8298	1	35.077	0.00047461	9.8823	52186000
A0A1D5PVA4;A0A1D5NZS8	tr|A0A1D5PVA4|A0A1D5PVA4_CHICK AAA domain-containing protein OS=Gallus gallus OX=9031 GN=ATAD3B PE=3 SV=1;tr|A0A1D5NZS8|A0A1D5NZS8_CHICK AAA domain-containing protein OS=Gallus gallus OX=9031 GN=ATAD3B PE=3 SV=1	18.3273	24.078	12	67.219	0	148.23	559180000
A0A1D5PVC4	tr|A0A1D5PVC4|A0A1D5PVC4_CHICK CCR4-NOT transcription complex subunit 9 OS=Gallus gallus OX=9031 GN=CNOT9 PE=3 SV=1	NaN	22.3037	4	33.601	0	34.929	88007000
A0A1D5PVE4	tr|A0A1D5PVE4|A0A1D5PVE4_CHICK Helicase_PWI domain-containing protein OS=Gallus gallus OX=9031 PE=4 SV=1	NaN	16.8183	1	69.579	0.0038551	6.0599	3697900
A0A1D5PVH7	tr|A0A1D5PVH7|A0A1D5PVH7_CHICK Tyrosine-protein kinase receptor OS=Gallus gallus OX=9031 GN=IGF1R PE=3 SV=2	NaN	20.813	2	154.1	0	36.6	128960000
A0A1D5PVL4	tr|A0A1D5PVL4|A0A1D5PVL4_CHICK MPN domain-containing protein OS=Gallus gallus OX=9031 GN=EIF3F PE=4 SV=2	NaN	24.6707	6	23.239	0	211.12	320490000
A0A1D5PVL8;A0A3Q2TTV1	tr|A0A1D5PVL8|A0A1D5PVL8_CHICK Uncharacterized protein OS=Gallus gallus OX=9031 PE=3 SV=1;tr|A0A3Q2TTV1|A0A3Q2TTV1_CHICK Uncharacterized protein OS=Gallus gallus OX=9031 PE=3 SV=1	NaN	20.6084	1	34.594	0.0070869	5.7949	25578000
A0A1L1RUX2;A0A1D5PVM5;Q8JFP1;A0A1D5P2Y8	tr|A0A1L1RUX2|A0A1L1RUX2_CHICK RNA helicase OS=Gallus gallus OX=9031 GN=EIF4A2 PE=3 SV=2;tr|A0A1D5PVM5|A0A1D5PVM5_CHICK RNA helicase OS=Gallus gallus OX=9031 GN=EIF4A2 PE=3 SV=2;sp|Q8JFP1|IF4A2_CHICK Eukaryotic initiation factor 4A-II OS=Gallus gallus OX=9	24.1151	28.4351	12	42.389	0	237	8384100000
Q589G5;A0A1D5PVP9	sp|Q589G5|PRTG_CHICK Protogenin OS=Gallus gallus OX=9031 GN=PRTG PE=2 SV=1;tr|A0A1D5PVP9|A0A1D5PVP9_CHICK Protogenin OS=Gallus gallus OX=9031 GN=PRTG PE=4 SV=2	NaN	20.6407	2	130.51	0	31.933	89916000
I7LRG5;A0A1D5PVQ7;A0A1L1RUW4	tr|I7LRG5|I7LRG5_CHICK HN1 OS=Gallus gallus OX=9031 GN=HN1 PE=2 SV=1;tr|A0A1D5PVQ7|A0A1D5PVQ7_CHICK Uncharacterized protein OS=Gallus gallus OX=9031 GN=HN1 PE=3 SV=2;tr|A0A1L1RUW4|A0A1L1RUW4_CHICK Uncharacterized protein OS=Gallus gallus OX=9031 GN=HN1 PE=	NaN	22.4474	2	16.106	0	31.258	40034000
A0A1D5PVS3	tr|A0A1D5PVS3|A0A1D5PVS3_CHICK Uncharacterized protein OS=Gallus gallus OX=9031 GN=TOMM6 PE=4 SV=1	NaN	22.7574	2	7.896	0	15.035	14180000
Q5ZI34;A0A1D5PW05	sp|Q5ZI34|PXL2A_CHICK Peroxiredoxin-like 2A OS=Gallus gallus OX=9031 GN=PRXL2A PE=2 SV=2;tr|A0A1D5PW05|A0A1D5PW05_CHICK Uncharacterized protein OS=Gallus gallus OX=9031 GN=FAM213A PE=4 SV=1	NaN	20.119	1	24.947	0.0031128	6.1404	13664000
A0A1D5PW25	tr|A0A1D5PW25|A0A1D5PW25_CHICK L-type lectin-like domain-containing protein OS=Gallus gallus OX=9031 GN=LMAN2 PE=4 SV=1	NaN	24.5502	5	37.538	0	47.251	417640000
A0A3Q2U353;A0A1D5PW31;A0A3Q2U0Q7	tr|A0A3Q2U353|A0A3Q2U353_CHICK Cilia- and flagella-associated protein 36 OS=Gallus gallus OX=9031 GN=CFAP36 PE=3 SV=1;tr|A0A1D5PW31|A0A1D5PW31_CHICK Cilia- and flagella-associated protein 36 OS=Gallus gallus OX=9031 GN=CFAP36 PE=3 SV=1;tr|A0A3Q2U0Q7|A0A3Q2	NaN	19.453	1	37.935	0.00046926	9.372	12918000
A0A1D5PW44;A0A3Q2U9F1	tr|A0A1D5PW44|A0A1D5PW44_CHICK Peptidyl-prolyl cis-trans isomerase OS=Gallus gallus OX=9031 GN=PPIL1 PE=3 SV=1;tr|A0A3Q2U9F1|A0A3Q2U9F1_CHICK Peptidyl-prolyl cis-trans isomerase OS=Gallus gallus OX=9031 GN=PPIL1 PE=3 SV=1	20.6614	24.5281	3	18.095	0	23.049	206810000
A0A1D5PW68	tr|A0A1D5PW68|A0A1D5PW68_CHICK Eukaryotic translation initiation factor 3 subunit B OS=Gallus gallus OX=9031 GN=EIF3B PE=3 SV=2	NaN	23.9216	10	92.309	0	131.75	556150000
Q5ZM76;A0A1D5PWA9;A0A3Q3AB26;A0A3Q2TU83;A0A3Q2UAQ9;A0A3Q3AK86;A0A3Q2UDZ2	tr|Q5ZM76|Q5ZM76_CHICK Uncharacterized protein OS=Gallus gallus OX=9031 GN=FUBP3 PE=2 SV=1;tr|A0A1D5PWA9|A0A1D5PWA9_CHICK Uncharacterized protein OS=Gallus gallus OX=9031 GN=FUBP3 PE=4 SV=2;tr|A0A3Q3AB26|A0A3Q3AB26_CHICK Uncharacterized protein OS=Gallus g	NaN	23.9987	9	57.956	0	89.686	519620000
A0A1D5PWB6	tr|A0A1D5PWB6|A0A1D5PWB6_CHICK Uncharacterized protein OS=Gallus gallus OX=9031 GN=LAS1L PE=4 SV=1	NaN	17.9043	1	72.498	0.00043141	7.3289	7114200
A0A1D5PWD8	tr|A0A1D5PWD8|A0A1D5PWD8_CHICK Dihydrolipoamide acetyltransferase component of pyruvate dehydrogenase complex OS=Gallus gallus OX=9031 GN=DBT PE=3 SV=2	NaN	22.5261	7	54.097	0	47.722	187240000
A0A1D5PWF0;Q5ZM89	tr|A0A1D5PWF0|A0A1D5PWF0_CHICK COMM domain-containing protein 5 OS=Gallus gallus OX=9031 GN=COMMD5 PE=4 SV=1;tr|Q5ZM89|Q5ZM89_CHICK COMM domain-containing protein 5 OS=Gallus gallus OX=9031 GN=COMMD5 PE=2 SV=1	NaN	20.2926	1	22.965	0	20.644	19265000
F1NCS2;A0A1D5PWG1	tr|F1NCS2|F1NCS2_CHICK Uncharacterized protein OS=Gallus gallus OX=9031 GN=EWSR1 PE=3 SV=4;tr|A0A1D5PWG1|A0A1D5PWG1_CHICK Uncharacterized protein OS=Gallus gallus OX=9031 GN=EWSR1 PE=3 SV=3	NaN	22.886	3	72.362	0	57.164	147280000
A0A1D5PWH6;Q5ZJK1;A0A1L1S0H5	tr|A0A1D5PWH6|A0A1D5PWH6_CHICK THO complex subunit 5 homolog OS=Gallus gallus OX=9031 GN=THOC5 PE=3 SV=2;sp|Q5ZJK1|THOC5_CHICK THO complex subunit 5 homolog OS=Gallus gallus OX=9031 GN=THOC5 PE=2 SV=1;tr|A0A1L1S0H5|A0A1L1S0H5_CHICK THO complex subunit 5 ho	NaN	20.3049	2	78.612	0	12.629	42745000
Q5F334;F1NU90;A0A1D5PWK4	sp|Q5F334|LRC59_CHICK Leucine-rich repeat-containing protein 59 OS=Gallus gallus OX=9031 GN=LRRC59 PE=2 SV=1;tr|F1NU90|F1NU90_CHICK Leucine-rich repeat-containing protein 59 OS=Gallus gallus OX=9031 GN=LRRC59 PE=4 SV=1;tr|A0A1D5PWK4|A0A1D5PWK4_CHICK Leucin	NaN	22.8316	2	38.665	0	19.843	104500000
A0A1D5PWL1	tr|A0A1D5PWL1|A0A1D5PWL1_CHICK SAM_MT_RSMB_NOP domain-containing protein OS=Gallus gallus OX=9031 GN=NOP2 PE=3 SV=2	NaN	21.8719	5	60.559	0	39.236	99789000
A0A1D5PWP7	tr|A0A1D5PWP7|A0A1D5PWP7_CHICK Protein disulfide-isomerase A4 OS=Gallus gallus OX=9031 GN=PDIA4 PE=3 SV=1	NaN	26.9173	25	72.678	0	306.86	4942700000
F1NV09;Q5F381;A0A1D5PWY3	tr|F1NV09|F1NV09_CHICK Epithelial cell adhesion molecule OS=Gallus gallus OX=9031 GN=EPCAM PE=3 SV=2;sp|Q5F381|EPCAM_CHICK Epithelial cell adhesion molecule OS=Gallus gallus OX=9031 GN=EPCAM PE=2 SV=1;tr|A0A1D5PWY3|A0A1D5PWY3_CHICK Epithelial cell adhesion	NaN	23.3778	3	33.611	0	23.189	141700000
A0A1D5PX32;A0A1L1RZD1;Q5ZMI0;A0A1D5NVD4	tr|A0A1D5PX32|A0A1D5PX32_CHICK Uncharacterized protein OS=Gallus gallus OX=9031 GN=SRSF7L PE=4 SV=2;tr|A0A1L1RZD1|A0A1L1RZD1_CHICK Uncharacterized protein OS=Gallus gallus OX=9031 GN=SRSF7 PE=4 SV=2;tr|Q5ZMI0|Q5ZMI0_CHICK Uncharacterized protein OS=Gallus	22.4017	26.651	3	28.751	0	45.202	998280000
A0A1D5PX68	tr|A0A1D5PX68|A0A1D5PX68_CHICK Uncharacterized protein OS=Gallus gallus OX=9031 GN=SLC25A1 PE=3 SV=1	NaN	21.1119	1	33.907	0.0008547	7.2315	40793000
A0A1D5PX97;F1NIQ9	tr|A0A1D5PX97|A0A1D5PX97_CHICK AMP_N domain-containing protein OS=Gallus gallus OX=9031 GN=PEPD PE=3 SV=2;tr|F1NIQ9|F1NIQ9_CHICK AMP_N domain-containing protein OS=Gallus gallus OX=9031 GN=PEPD PE=3 SV=4	NaN	21.9822	4	55.121	0	33.954	107720000
A0A1D5PXD8	tr|A0A1D5PXD8|A0A1D5PXD8_CHICK Uncharacterized protein OS=Gallus gallus OX=9031 GN=AGO1 PE=3 SV=1	NaN	19.1782	3	97.231	0	24.251	27880000
A0A1D5PXG0;E1C453;Q5ZIQ3;A0A1D5PSI3	tr|A0A1D5PXG0|A0A1D5PXG0_CHICK Heterogeneous nuclear ribonucleoprotein K OS=Gallus gallus OX=9031 GN=HNRNPK PE=4 SV=2;tr|E1C453|E1C453_CHICK Heterogeneous nuclear ribonucleoprotein K OS=Gallus gallus OX=9031 GN=HNRNPK PE=4 SV=3;sp|Q5ZIQ3|HNRPK_CHICK Hetero	NaN	26.5113	12	47.102	0	194.94	2295700000
E1BZE6;A0A1D5PXH1	tr|E1BZE6|E1BZE6_CHICK Uncharacterized protein OS=Gallus gallus OX=9031 GN=HNRNPA3 PE=4 SV=3;tr|A0A1D5PXH1|A0A1D5PXH1_CHICK Heterogeneous nuclear ribonucleoprotein A3 OS=Gallus gallus OX=9031 GN=HNRNPA3 PE=4 SV=2	NaN	27.1326	8	39.54	0	323.31	2648600000
A0A1D5PXI1	tr|A0A1D5PXI1|A0A1D5PXI1_CHICK Multifunctional fusion protein OS=Gallus gallus OX=9031 GN=ALDH4A1 PE=3 SV=1	NaN	21.5566	2	60.626	0	42.667	74027000
A0A1D5PXK1;F1NJT0	tr|A0A1D5PXK1|A0A1D5PXK1_CHICK 39S ribosomal protein L30, mitochondrial OS=Gallus gallus OX=9031 GN=MRPL30 PE=3 SV=2;tr|F1NJT0|F1NJT0_CHICK 39S ribosomal protein L30, mitochondrial OS=Gallus gallus OX=9031 GN=MRPL30 PE=3 SV=3	NaN	22.3968	1	18.109	0.00045167	8.0626	44176000
A0A1D5PXL0	tr|A0A1D5PXL0|A0A1D5PXL0_CHICK Beta-galactosidase OS=Gallus gallus OX=9031 GN=GLB1 PE=3 SV=1	NaN	23.6225	6	73.445	0	110.15	322880000
A0A1D5PXQ1	tr|A0A1D5PXQ1|A0A1D5PXQ1_CHICK Uncharacterized protein OS=Gallus gallus OX=9031 GN=NUP153 PE=4 SV=3	NaN	21.1521	7	151.03	0	101.84	144480000
A0A1D5PXQ6	tr|A0A1D5PXQ6|A0A1D5PXQ6_CHICK Uncharacterized protein OS=Gallus gallus OX=9031 GN=PRCC PE=4 SV=3	NaN	17.8537	1	54.456	0.0049885	6.0162	4026800
A0A1D5PXS5;F1NN25	tr|A0A1D5PXS5|A0A1D5PXS5_CHICK TPR_REGION domain-containing protein OS=Gallus gallus OX=9031 GN=TRAPPC12 PE=4 SV=2;tr|F1NN25|F1NN25_CHICK TPR_REGION domain-containing protein OS=Gallus gallus OX=9031 GN=TRAPPC12 PE=4 SV=2	NaN	18.6307	1	82.498	0.00046904	9.3639	14612000
P41239;A0A1D5PXS9	sp|P41239|CSK_CHICK Tyrosine-protein kinase CSK OS=Gallus gallus OX=9031 GN=CSK PE=2 SV=1;tr|A0A1D5PXS9|A0A1D5PXS9_CHICK Tyrosine-protein kinase OS=Gallus gallus OX=9031 GN=CSK PE=3 SV=1	NaN	22.5899	7	50.751	0	49.625	176770000
A0A1D5PXT0	tr|A0A1D5PXT0|A0A1D5PXT0_CHICK UBC core domain-containing protein OS=Gallus gallus OX=9031 GN=UBE2M PE=3 SV=2	NaN	21.9197	1	20.947	0.00045372	8.1606	43638000
A0A1D5PY03;A0A3Q2UJF4;F1NB03	tr|A0A1D5PY03|A0A1D5PY03_CHICK Kinesin-like protein OS=Gallus gallus OX=9031 GN=KIF2C PE=3 SV=2;tr|A0A3Q2UJF4|A0A3Q2UJF4_CHICK Kinesin-like protein OS=Gallus gallus OX=9031 GN=KIF2C PE=3 SV=1;tr|F1NB03|F1NB03_CHICK Kinesin-like protein OS=Gallus gallus OX=	NaN	17.875	1	75.647	0.0074322	5.7746	8173300
A0A1D5PY21;A0A3Q2UA45	tr|A0A1D5PY21|A0A1D5PY21_CHICK Uncharacterized protein OS=Gallus gallus OX=9031 GN=FUNDC2 PE=3 SV=2;tr|A0A3Q2UA45|A0A3Q2UA45_CHICK Uncharacterized protein OS=Gallus gallus OX=9031 GN=FUNDC2 PE=3 SV=1	NaN	18.7392	1	19.94	0.00083195	6.8416	4375700
A0A1D5PY43;A0A3Q2UNC5;A0A3Q3AH83	tr|A0A1D5PY43|A0A1D5PY43_CHICK Uncharacterized protein OS=Gallus gallus OX=9031 GN=GKAP1 PE=3 SV=3;tr|A0A3Q2UNC5|A0A3Q2UNC5_CHICK G kinase anchoring protein 1 OS=Gallus gallus OX=9031 GN=GKAP1 PE=3 SV=1;tr|A0A3Q3AH83|A0A3Q3AH83_CHICK Uncharacterized protei	NaN	18.8899	1	41.882	1	-2	11172000
Q6B344;E1BWX1;A0A1D5PY67;P51901	tr|Q6B344|Q6B344_CHICK Annexin OS=Gallus gallus OX=9031 GN=ANXA6 PE=2 SV=1;tr|E1BWX1|E1BWX1_CHICK Annexin OS=Gallus gallus OX=9031 GN=ANXA6 PE=3 SV=3;tr|A0A1D5PY67|A0A1D5PY67_CHICK Annexin OS=Gallus gallus OX=9031 GN=ANXA6 PE=3 SV=2;sp|P51901|ANXA6_CHICK A	NaN	23.8001	14	75.226	0	323.31	671880000
A0A1D5PYB1	tr|A0A1D5PYB1|A0A1D5PYB1_CHICK Peptidylprolyl isomerase OS=Gallus gallus OX=9031 GN=FKBP9 PE=4 SV=1	NaN	23.2891	4	64.371	0	24.284	246010000
A0A1D5PYI7	tr|A0A1D5PYI7|A0A1D5PYI7_CHICK U6 snRNA-associated Sm-like protein LSm5 OS=Gallus gallus OX=9031 GN=LSM5 PE=3 SV=1	NaN	21.5941	1	9.9234	0	18.321	9497000
A0A1D5PYL3	tr|A0A1D5PYL3|A0A1D5PYL3_CHICK Katanin p60 ATPase-containing subunit A-like 2 OS=Gallus gallus OX=9031 GN=KATNAL2 PE=3 SV=1	NaN	24.0768	1	60.215	0.00044543	7.77	513170000
A0A1D5PYQ3	tr|A0A1D5PYQ3|A0A1D5PYQ3_CHICK Tr-type G domain-containing protein OS=Gallus gallus OX=9031 GN=GSPT2 PE=3 SV=1	NaN	20.7009	2	67.658	0	14.401	42613000
A0A1D5PYS3;P53033	tr|A0A1D5PYS3|A0A1D5PYS3_CHICK Replication factor C subunit 2 OS=Gallus gallus OX=9031 GN=RFC2 PE=3 SV=1;sp|P53033|RFC2_CHICK Replication factor C subunit 2 OS=Gallus gallus OX=9031 GN=RFC2 PE=2 SV=1	NaN	22.6849	6	36.601	0	82.39	141600000
A0A1D5PYY5;F1P349;Q8JIF5	tr|A0A1D5PYY5|A0A1D5PYY5_CHICK ERA-like protein 1 OS=Gallus gallus OX=9031 GN=ERAL1 PE=3 SV=2;tr|F1P349|F1P349_CHICK ERA-like protein 1 OS=Gallus gallus OX=9031 GN=ERAL1 PE=3 SV=3;sp|Q8JIF5|ERAL1_CHICK GTPase Era, mitochondrial OS=Gallus gallus OX=9031 GN=	NaN	21.1576	2	57.375	0	12.019	67836000
A0A1D5PZ01;F1NJL0;A0A3Q2UET9	tr|A0A1D5PZ01|A0A1D5PZ01_CHICK LsmAD domain-containing protein OS=Gallus gallus OX=9031 GN=ATXN2L PE=3 SV=2;tr|F1NJL0|F1NJL0_CHICK LsmAD domain-containing protein OS=Gallus gallus OX=9031 GN=ATXN2L PE=3 SV=4;tr|A0A3Q2UET9|A0A3Q2UET9_CHICK LsmAD domain-cont	NaN	23.651	6	114.26	0	106.87	513690000
A0A1D5PZ51;A0A3Q2TWY6;F1NS48	tr|A0A1D5PZ51|A0A1D5PZ51_CHICK Amidohydro-rel domain-containing protein OS=Gallus gallus OX=9031 GN=DPYSL3 PE=3 SV=2;tr|A0A3Q2TWY6|A0A3Q2TWY6_CHICK Amidohydro-rel domain-containing protein OS=Gallus gallus OX=9031 GN=DPYSL3 PE=3 SV=1;tr|F1NS48|F1NS48_CHICK	NaN	24.359	13	70.714	0	192.45	796130000
A0A1D5PZ61;E1BWP4	tr|A0A1D5PZ61|A0A1D5PZ61_CHICK FIP1-like 1 protein OS=Gallus gallus OX=9031 GN=FIP1L1 PE=3 SV=1;tr|E1BWP4|E1BWP4_CHICK FIP1-like 1 protein OS=Gallus gallus OX=9031 GN=FIP1L1 PE=3 SV=4	NaN	20.6341	3	58.374	0	32.439	34176000
P07850;A0A1D5PZ75	sp|P07850|SUOX_CHICK Sulfite oxidase OS=Gallus gallus OX=9031 GN=SUOX PE=1 SV=3;tr|A0A1D5PZ75|A0A1D5PZ75_CHICK Sulfite oxidase OS=Gallus gallus OX=9031 PE=3 SV=2	NaN	16.7303	1	50.204	0.00043234	7.3386	2391800
A0A1D5PZ83;E1BRB3	tr|A0A1D5PZ83|A0A1D5PZ83_CHICK J domain-containing protein OS=Gallus gallus OX=9031 GN=DNAJC19 PE=4 SV=1;tr|E1BRB3|E1BRB3_CHICK J domain-containing protein OS=Gallus gallus OX=9031 GN=DNAJC19 PE=4 SV=3	NaN	21.7079	1	12.243	0.00047059	9.4828	27404000
A0A1D5PZ89;Q6PVZ1;A0A1D5PXW6	tr|A0A1D5PZ89|A0A1D5PZ89_CHICK Keratin, type I cytoskeletal 14 OS=Gallus gallus OX=9031 GN=KRT14 PE=3 SV=1;sp|Q6PVZ1|K1C14_CHICK Keratin, type I cytoskeletal 14 OS=Gallus gallus OX=9031 GN=KRT14 PE=2 SV=1;tr|A0A1D5PXW6|A0A1D5PXW6_CHICK IF rod domain-contai	NaN	23.0663	6	51.013	0	58.167	254700000
A0A3Q2TW24;A0A1D5PZD0	tr|A0A3Q2TW24|A0A3Q2TW24_CHICK Uncharacterized protein OS=Gallus gallus OX=9031 GN=MYZAP PE=4 SV=1;tr|A0A1D5PZD0|A0A1D5PZD0_CHICK Uncharacterized protein OS=Gallus gallus OX=9031 GN=MYZAP PE=4 SV=1	NaN	21.6424	1	53.355	1	-2	88388000
Q90955;A0A1D5PZE1;A0A3Q2UCS1;A0A3Q2U4I4;A0A3Q2U7H6;A0A3Q2TW82;A0A3Q2UD90;A0A3Q2UEJ5	sp|Q90955|TEBP_CHICK Prostaglandin E synthase 3 (Fragment) OS=Gallus gallus OX=9031 GN=PTGES3 PE=1 SV=1;tr|A0A1D5PZE1|A0A1D5PZE1_CHICK Prostaglandin E synthase 3 OS=Gallus gallus OX=9031 GN=PTGES3 PE=4 SV=2;tr|A0A3Q2UCS1|A0A3Q2UCS1_CHICK Prostaglandin E sy	NaN	22.1983	2	16.869	0	18.119	38499000
F1NLL2;A0A1D5PZH3	tr|F1NLL2|F1NLL2_CHICK Beta-galactosidase OS=Gallus gallus OX=9031 GN=GLB1L2 PE=3 SV=3;tr|A0A1D5PZH3|A0A1D5PZH3_CHICK Beta-galactosidase OS=Gallus gallus OX=9031 GN=GLB1L2 PE=3 SV=1	NaN	19.3762	1	72.938	0	12.631	20414000
A0A1D5PZI9	tr|A0A1D5PZI9|A0A1D5PZI9_CHICK RNA exonuclease 4 OS=Gallus gallus OX=9031 GN=REXO4 PE=3 SV=2	NaN	19.2925	1	19.68	0.0023838	6.3179	5779000
A0A1D5PZK7	tr|A0A1D5PZK7|A0A1D5PZK7_CHICK [Acyl-carrier-protein] S-malonyltransferase OS=Gallus gallus OX=9031 GN=MCAT PE=4 SV=3	NaN	20.8703	2	43.212	0	13.317	34502000
A0A3Q2U2L2;A0A1D5PZL3	tr|A0A3Q2U2L2|A0A3Q2U2L2_CHICK Vacuolar protein sorting-associated protein 16 homolog OS=Gallus gallus OX=9031 GN=VPS16 PE=3 SV=1;tr|A0A1D5PZL3|A0A1D5PZL3_CHICK Vacuolar protein sorting-associated protein 16 homolog OS=Gallus gallus OX=9031 GN=VPS16 PE=3 S	NaN	18.7649	1	91.359	0	35.802	18263000
A0A3Q2UHA1;A0A1D5PZM8	tr|A0A3Q2UHA1|A0A3Q2UHA1_CHICK Uncharacterized protein OS=Gallus gallus OX=9031 GN=FAAP100 PE=4 SV=1;tr|A0A1D5PZM8|A0A1D5PZM8_CHICK Uncharacterized protein OS=Gallus gallus OX=9031 GN=FAAP100 PE=4 SV=2	NaN	17.7008	1	87.398	0.0060514	5.904	6178400
A0A1D5PZS0;Q5ZMA2	tr|A0A1D5PZS0|A0A1D5PZS0_CHICK PRP19/PSO4 homolog OS=Gallus gallus OX=9031 GN=PRPF19 PE=3 SV=2;sp|Q5ZMA2|PRP19_CHICK Pre-mRNA-processing factor 19 OS=Gallus gallus OX=9031 GN=PRPF19 PE=1 SV=1	23.8594	24.7519	9	55.067	0	96.101	825970000
A0A1D5PZT0	tr|A0A1D5PZT0|A0A1D5PZT0_CHICK alpha-1,2-Mannosidase OS=Gallus gallus OX=9031 GN=MAN1A2 PE=3 SV=2	NaN	17.0583	1	73.074	0.0030996	6.0896	3821400
A0A1D5PZU7	tr|A0A1D5PZU7|A0A1D5PZU7_CHICK Peptidyl-prolyl cis-trans isomerase OS=Gallus gallus OX=9031 GN=PIN1 PE=4 SV=1	NaN	23.7842	2	18.101	0	35.997	115570000
A0A1D5PZX4	tr|A0A1D5PZX4|A0A1D5PZX4_CHICK Uncharacterized protein OS=Gallus gallus OX=9031 GN=SLC25A32 PE=3 SV=1	NaN	18.519	1	35.653	0.00083787	6.9686	5634800
P15143;A0A1D5PZY6;F1NSK6	sp|P15143|PO2F1_CHICK POU domain, class 2, transcription factor 1 OS=Gallus gallus OX=9031 GN=POU2F1 PE=2 SV=1;tr|A0A1D5PZY6|A0A1D5PZY6_CHICK POU domain protein OS=Gallus gallus OX=9031 GN=POU2F1 PE=3 SV=2;tr|F1NSK6|F1NSK6_CHICK POU domain protein OS=Gallu	NaN	20.0344	1	75.981	0.0023576	6.2238	11813000
A0A1D5Q006	tr|A0A1D5Q006|A0A1D5Q006_CHICK Protein CDV3 homolog OS=Gallus gallus OX=9031 GN=CDV3 PE=3 SV=1	NaN	23.0868	1	21.64	0	86.918	97993000
A0A1D5Q008	tr|A0A1D5Q008|A0A1D5Q008_CHICK Mannose-6-phosphate isomerase OS=Gallus gallus OX=9031 GN=MPI PE=3 SV=3	NaN	22.7337	3	45.847	0	32.362	139500000
A0A1D5Q032	tr|A0A1D5Q032|A0A1D5Q032_CHICK Adenylyl cyclase-associated protein OS=Gallus gallus OX=9031 GN=CAP1 PE=3 SV=2	NaN	25.1049	11	51.079	0	256.41	938220000
A0A1D6UPQ3	tr|A0A1D6UPQ3|A0A1D6UPQ3_CHICK Threonyl-tRNA synthetase OS=Gallus gallus OX=9031 GN=TARS PE=3 SV=1	NaN	22.4584	3	90.648	0	29.011	230520000
A0A1D6UPS7	tr|A0A1D6UPS7|A0A1D6UPS7_CHICK AB hydrolase-1 domain-containing protein OS=Gallus gallus OX=9031 GN=EPHX2 PE=4 SV=2	NaN	21.8018	5	66.831	0	33.464	109670000
A0A1D6UPS9	tr|A0A1D6UPS9|A0A1D6UPS9_CHICK CPSF_A domain-containing protein OS=Gallus gallus OX=9031 GN=SF3B3 PE=4 SV=1	NaN	23.4679	17	135.49	0	185.65	603320000
A0A1D6UPT4	tr|A0A1D6UPT4|A0A1D6UPT4_CHICK Uncharacterized protein OS=Gallus gallus OX=9031 GN=AIFM1 PE=3 SV=1	NaN	23.8195	13	75.014	0	242.52	592140000
A0A1D6UPU6;E1C8Z0;A0A1L1RNV0;A0A1L1RL15	tr|A0A1D6UPU6|A0A1D6UPU6_CHICK Dolichyl-diphosphooligosaccharide--protein glycosyltransferase subunit 2 OS=Gallus gallus OX=9031 GN=RPN2 PE=3 SV=2;tr|E1C8Z0|E1C8Z0_CHICK Dolichyl-diphosphooligosaccharide--protein glycosyltransferase subunit 2 OS=Gallus gal	NaN	24.9096	8	73.598	0	108.06	787900000
P00523;A0A1I7Q3Z0;P09324	sp|P00523|SRC_CHICK Proto-oncogene tyrosine-protein kinase Src OS=Gallus gallus OX=9031 GN=SRC PE=1 SV=4;tr|A0A1I7Q3Z0|A0A1I7Q3Z0_CHICK Tyrosine-protein kinase OS=Gallus gallus OX=9031 GN=SRC PE=3 SV=2;sp|P09324|YES_CHICK Tyrosine-protein kinase Yes OS=Gal	NaN	19.7243	2	60.009	0	56.356	24253000
A0A1I7Q3Z7;Q5ZLC7	tr|A0A1I7Q3Z7|A0A1I7Q3Z7_CHICK Microtubule-associated protein RP/EB family member 1 OS=Gallus gallus OX=9031 GN=MAPRE1 PE=3 SV=2;sp|Q5ZLC7|MARE1_CHICK Microtubule-associated protein RP/EB family member 1 OS=Gallus gallus OX=9031 GN=MAPRE1 PE=2 SV=1	NaN	26.5549	12	29.516	0	323.31	1478900000
A0A1I7Q403	tr|A0A1I7Q403|A0A1I7Q403_CHICK Ubiquitin-conjugating enzyme E2 variant 1 OS=Gallus gallus OX=9031 GN=UBE2V1 PE=4 SV=2	NaN	26.7769	1	16.463	0	87.602	1149900000
A0A1I7Q419;A0A1D5PNC6	tr|A0A1I7Q419|A0A1I7Q419_CHICK 40S ribosomal protein S12 OS=Gallus gallus OX=9031 GN=RPS12 PE=3 SV=1;tr|A0A1D5PNC6|A0A1D5PNC6_CHICK 40S ribosomal protein S12 OS=Gallus gallus OX=9031 GN=RPS12 PE=3 SV=2	NaN	26.1585	1	13.529	0	68.609	524320000
P27731;A0A1I7Q422	sp|P27731|TTHY_CHICK Transthyretin OS=Gallus gallus OX=9031 GN=TTR PE=1 SV=1;tr|A0A1I7Q422|A0A1I7Q422_CHICK Transthyretin OS=Gallus gallus OX=9031 GN=TTR PE=3 SV=1	NaN	28.5589	5	16.309	0	62.661	2372700000
Q5ZK33;A0A1I7Q423	sp|Q5ZK33|LETM1_CHICK Mitochondrial proton/calcium exchanger protein OS=Gallus gallus OX=9031 GN=LETM1 PE=2 SV=1;tr|A0A1I7Q423|A0A1I7Q423_CHICK Leucine zipper-EF-hand-containing transmembrane protein 1 OS=Gallus gallus OX=9031 GN=LETM1 PE=3 SV=1	NaN	22.0247	8	85.848	0	72.524	192000000
A0A1L1RIN1	tr|A0A1L1RIN1|A0A1L1RIN1_CHICK Calcium load-activated calcium channel OS=Gallus gallus OX=9031 GN=TMCO1 PE=3 SV=2	NaN	23.1656	2	21.296	0	28.488	56452000
A0A1L1RIW5	tr|A0A1L1RIW5|A0A1L1RIW5_CHICK IF rod domain-containing protein OS=Gallus gallus OX=9031 GN=KRT8 PE=3 SV=2	20.7931	24.6211	11	60.513	0	147.85	524790000
A0A3Q2UK97;A0A1L1RIY7;Q5ZM16;F1NMD7	tr|A0A3Q2UK97|A0A3Q2UK97_CHICK Pre-mRNA-splicing factor RBM22 OS=Gallus gallus OX=9031 GN=RBM22 PE=3 SV=1;tr|A0A1L1RIY7|A0A1L1RIY7_CHICK Pre-mRNA-splicing factor RBM22 OS=Gallus gallus OX=9031 GN=RBM22 PE=3 SV=2;sp|Q5ZM16|RBM22_CHICK Pre-mRNA-splicing fact	NaN	22.8032	1	43.484	0.0004386	7.553	161020000
A0A1L1RJ78;F1NVA4;P16039	tr|A0A1L1RJ78|A0A1L1RJ78_CHICK Nucleophosmin OS=Gallus gallus OX=9031 GN=NPM1 PE=3 SV=1;tr|F1NVA4|F1NVA4_CHICK Nucleophosmin OS=Gallus gallus OX=9031 GN=NPM1 PE=3 SV=4;sp|P16039|NPM_CHICK Nucleophosmin OS=Gallus gallus OX=9031 GN=NPM1 PE=2 SV=1	NaN	28.2971	12	43.828	0	214.75	7256200000
P35915;A0A1L1RJ90;F1P1E7	sp|P35915|HMGCL_CHICK Hydroxymethylglutaryl-CoA lyase, mitochondrial OS=Gallus gallus OX=9031 GN=HMGCL PE=1 SV=1;tr|A0A1L1RJ90|A0A1L1RJ90_CHICK 3-hydroxy-3-methylglutarate-CoA lyase OS=Gallus gallus OX=9031 GN=HMGCL PE=3 SV=1;tr|F1P1E7|F1P1E7_CHICK 3-hydro	NaN	20.2049	2	31.436	0	13.704	20547000
E1C038;A0A1L1RJG1	tr|E1C038|E1C038_CHICK Guanylate kinase OS=Gallus gallus OX=9031 GN=GUK1 PE=3 SV=3;tr|A0A1L1RJG1|A0A1L1RJG1_CHICK Guanylate kinase OS=Gallus gallus OX=9031 GN=GUK1 PE=3 SV=2	NaN	20.9129	1	24.002	0	13.346	23692000
A0A1L1RJL0	tr|A0A1L1RJL0|A0A1L1RJL0_CHICK WD_REPEATS_REGION domain-containing protein OS=Gallus gallus OX=9031 GN=THOC3 PE=4 SV=2	17.9021	19.9818	1	42.117	0	35.001	24326000
A0A1L1RJR6	tr|A0A1L1RJR6|A0A1L1RJR6_CHICK Uncharacterized protein OS=Gallus gallus OX=9031 GN=METTL3 PE=3 SV=2	NaN	20.0896	1	60.97	0.0023659	6.259	33475000
A0A1L1RJT5	tr|A0A1L1RJT5|A0A1L1RJT5_CHICK 40S ribosomal protein S30 OS=Gallus gallus OX=9031 GN=FAU PE=3 SV=1	NaN	25.5638	2	10.155	0	15.999	148800000
A0A1L1RJY0	tr|A0A1L1RJY0|A0A1L1RJY0_CHICK Uncharacterized protein OS=Gallus gallus OX=9031 GN=RABEP1 PE=3 SV=1	NaN	17.2372	1	90.479	0.0067365	5.8179	7415500
A0A1L1RJZ9;F1NNK9	tr|A0A1L1RJZ9|A0A1L1RJZ9_CHICK Amidohydro-rel domain-containing protein OS=Gallus gallus OX=9031 GN=DPYSL4 PE=3 SV=2;tr|F1NNK9|F1NNK9_CHICK Amidohydro-rel domain-containing protein OS=Gallus gallus OX=9031 GN=DPYSL4 PE=3 SV=3	NaN	18.318	1	69.672	0.0016168	6.4982	12418000
A0A1L1RK07;Q8QGX4	tr|A0A1L1RK07|A0A1L1RK07_CHICK DNA-dependent protein kinase catalytic subunit OS=Gallus gallus OX=9031 GN=PRKDC PE=3 SV=2;sp|Q8QGX4|PRKDC_CHICK DNA-dependent protein kinase catalytic subunit OS=Gallus gallus OX=9031 GN=PRKDC PE=2 SV=1	NaN	15.7651	1	472.25	1	-2	12196000
E1C4A9;A0A3Q3B040;A0A1L1RT90;A0A1L1RK48	tr|E1C4A9|E1C4A9_CHICK WD_REPEATS_REGION domain-containing protein OS=Gallus gallus OX=9031 GN=UTP4 PE=4 SV=4;tr|A0A3Q3B040|A0A3Q3B040_CHICK WD_REPEATS_REGION domain-containing protein OS=Gallus gallus OX=9031 GN=UTP4 PE=4 SV=1;tr|A0A1L1RT90|A0A1L1RT90_CHI	18.684	17.8706	2	96.428	0	17.225	30397000
A0A1L1RK55	tr|A0A1L1RK55|A0A1L1RK55_CHICK GMP_PDE_delta domain-containing protein OS=Gallus gallus OX=9031 GN=UNC119B PE=3 SV=2	NaN	21.8889	3	24.464	0	17.118	54367000
A0A1L1RNP6;A0A3Q2TTP9;A0A1L1RKM6;A0A1L1RKT1;A0A1L1RSC6;A0A1L1RLF5;A0A1L1RKB2;A0A3Q2U120;A0A1L1RLU5;A0A3Q2U8L2;A0A3Q2TS12	tr|A0A1L1RNP6|A0A1L1RNP6_CHICK Uncharacterized protein OS=Gallus gallus OX=9031 PE=4 SV=2;tr|A0A3Q2TTP9|A0A3Q2TTP9_CHICK TPR_REGION domain-containing protein OS=Gallus gallus OX=9031 GN=LOC112531518 PE=4 SV=1;tr|A0A1L1RKM6|A0A1L1RKM6_CHICK TPR_REGION domai	NaN	20.475	1	20.709	0.0012205	6.5853	13116000
Q03669;A0A1L1RKB7	sp|Q03669|AT2A2_CHICK Sarcoplasmic/endoplasmic reticulum calcium ATPase 2 OS=Gallus gallus OX=9031 GN=ATP2A2 PE=2 SV=2;tr|A0A1L1RKB7|A0A1L1RKB7_CHICK Calcium-transporting ATPase OS=Gallus gallus OX=9031 GN=ATP2A2 PE=3 SV=2	NaN	22.5837	13	114.69	0	129.48	276580000
A0A1L1RKG9	tr|A0A1L1RKG9|A0A1L1RKG9_CHICK Uncharacterized protein OS=Gallus gallus OX=9031 GN=DNAJC24 PE=3 SV=1	NaN	22.4729	1	37.518	0.0074267	5.7729	128070000
F1NZ78;A0A1L1RQQ0;A0A1L1RKH8;A0A1L1RNS0;A0A1D5PSH6;P51913	tr|F1NZ78|F1NZ78_CHICK 2-phospho-D-glycerate hydro-lyase OS=Gallus gallus OX=9031 GN=ENO1 PE=3 SV=4;tr|A0A1L1RQQ0|A0A1L1RQQ0_CHICK 2-phospho-D-glycerate hydro-lyase OS=Gallus gallus OX=9031 GN=ENO1 PE=3 SV=1;tr|A0A1L1RKH8|A0A1L1RKH8_CHICK 2-phospho-D-glyce	NaN	27.7181	21	43.905	0	323.31	4415800000
A0A1L1RKT0	tr|A0A1L1RKT0|A0A1L1RKT0_CHICK Glycylpeptide N-tetradecanoyltransferase OS=Gallus gallus OX=9031 GN=NMT1 PE=3 SV=1	NaN	24.1648	7	56.865	0	138.12	470170000
F1NL52;A0A1L1RKU1	tr|F1NL52|F1NL52_CHICK Uncharacterized protein OS=Gallus gallus OX=9031 GN=NKRF PE=3 SV=2;tr|A0A1L1RKU1|A0A1L1RKU1_CHICK Uncharacterized protein OS=Gallus gallus OX=9031 GN=NKRF PE=3 SV=2	NaN	18.0464	1	86.335	0.0088268	5.6905	11099000
A0A1L1RL74;Q5ZI13;F1P053	tr|A0A1L1RL74|A0A1L1RL74_CHICK DnaJ homolog subfamily C member 3 OS=Gallus gallus OX=9031 GN=DNAJC3 PE=4 SV=2;sp|Q5ZI13|DNJC3_CHICK DnaJ homolog subfamily C member 3 OS=Gallus gallus OX=9031 GN=DNAJC3 PE=2 SV=1;tr|F1P053|F1P053_CHICK DnaJ homolog subfamily	NaN	21.5215	2	53.038	0	42.66	69237000
A0A1L1RNT6;A0A1L1RL76	tr|A0A1L1RNT6|A0A1L1RNT6_CHICK 60S ribosomal protein L14 OS=Gallus gallus OX=9031 GN=RPL14 PE=3 SV=2;tr|A0A1L1RL76|A0A1L1RL76_CHICK 60S ribosomal protein L14 OS=Gallus gallus OX=9031 GN=RPL14 PE=3 SV=2	NaN	27.3272	3	13.946	0	44.339	673570000
A0A1L1RLF4;F1NRW5	tr|A0A1L1RLF4|A0A1L1RLF4_CHICK Nuclear pore complex protein Nup85 OS=Gallus gallus OX=9031 GN=NUP85 PE=3 SV=2;tr|F1NRW5|F1NRW5_CHICK Nuclear pore complex protein Nup85 OS=Gallus gallus OX=9031 GN=NUP85 PE=3 SV=3	NaN	21.2952	3	88.069	0	22.254	95217000
A0A1L1RLH7;F1NSP7;Q90732	tr|A0A1L1RLH7|A0A1L1RLH7_CHICK 26S proteasome regulatory subunit 4 OS=Gallus gallus OX=9031 GN=PSMC1 PE=3 SV=2;tr|F1NSP7|F1NSP7_CHICK 26S proteasome regulatory subunit 4 OS=Gallus gallus OX=9031 GN=PSMC1 PE=3 SV=4;sp|Q90732|PRS4_CHICK 26S proteasome regula	NaN	24.9767	12	56.143	0	117.97	924490000
A0A1L1RLH8;F1NRK2	tr|A0A1L1RLH8|A0A1L1RLH8_CHICK Brix domain-containing protein OS=Gallus gallus OX=9031 GN=RPF1 PE=4 SV=2;tr|F1NRK2|F1NRK2_CHICK Brix domain-containing protein OS=Gallus gallus OX=9031 GN=RPF1 PE=4 SV=2	NaN	20.3808	2	38.815	0	14.759	17748000
A0A1L1RLL0	tr|A0A1L1RLL0|A0A1L1RLL0_CHICK TRASH domain-containing protein OS=Gallus gallus OX=9031 GN=RPL24 PE=3 SV=2	NaN	27.7459	5	17.688	0	66.116	1800700000
A0A1L1RLN6;P02607;A0A3Q2U5H1;A0A1D5PEM4	tr|A0A1L1RLN6|A0A1L1RLN6_CHICK Myosin light polypeptide 6 OS=Gallus gallus OX=9031 GN=MYL6 PE=4 SV=2;sp|P02607|MYL6_CHICK Myosin light polypeptide 6 OS=Gallus gallus OX=9031 GN=MYL6 PE=1 SV=3;tr|A0A3Q2U5H1|A0A3Q2U5H1_CHICK Myosin light polypeptide 6 OS=Gal	23.5187	24.9278	7	16.838	0	67.876	439340000
A0A1L1RLR2	tr|A0A1L1RLR2|A0A1L1RLR2_CHICK IST1 homolog OS=Gallus gallus OX=9031 GN=IST1 PE=3 SV=2	NaN	24.356	4	39.739	0	29.674	236200000
F1NZY9;A0A1L1RLZ8;A0A1L1RZM9	tr|F1NZY9|F1NZY9_CHICK NADH-cytochrome b5 reductase OS=Gallus gallus OX=9031 GN=CYB5R1 PE=3 SV=3;tr|A0A1L1RLZ8|A0A1L1RLZ8_CHICK NADH-cytochrome b5 reductase OS=Gallus gallus OX=9031 GN=CYB5R1 PE=3 SV=2;tr|A0A1L1RZM9|A0A1L1RZM9_CHICK NADH-cytochrome b5 redu	NaN	23.679	6	34.088	0	43.754	188020000
P24032;A0A1L1RUU9;A0A1L1RM08	sp|P24032|MLRN_CHICK Myosin regulatory light chain 2, smooth muscle minor isoform OS=Gallus gallus OX=9031 PE=2 SV=2;tr|A0A1L1RUU9|A0A1L1RUU9_CHICK Uncharacterized protein OS=Gallus gallus OX=9031 GN=MYL12B PE=4 SV=2;tr|A0A1L1RM08|A0A1L1RM08_CHICK Uncharac	24.9107	24.9893	3	19.911	0	76.086	583620000
A0A1L1RM23	tr|A0A1L1RM23|A0A1L1RM23_CHICK NADH dehydrogenase [ubiquinone] iron-sulfur protein 4, mitochondrial OS=Gallus gallus OX=9031 GN=NDUFS4 PE=3 SV=2	NaN	21.5248	2	32.699	0	13.777	54312000
A0A1L1RM52	tr|A0A1L1RM52|A0A1L1RM52_CHICK Uncharacterized protein OS=Gallus gallus OX=9031 GN=VPS26A PE=3 SV=2	NaN	23.5889	7	37.995	0	83.423	239730000
A0A1L1RM96	tr|A0A1L1RM96|A0A1L1RM96_CHICK WD_REPEATS_REGION domain-containing protein OS=Gallus gallus OX=9031 GN=PLRG1 PE=4 SV=2	NaN	20.1258	2	57.121	0	12.924	34322000
A0A1L1RM99;F1P1R2	tr|A0A1L1RM99|A0A1L1RM99_CHICK Uncharacterized protein OS=Gallus gallus OX=9031 GN=RBM19 PE=4 SV=2;tr|F1P1R2|F1P1R2_CHICK Uncharacterized protein OS=Gallus gallus OX=9031 GN=RBM19 PE=4 SV=2	NaN	19.3535	2	110.51	0	11.6	36842000
A0A1L1RMC0;O42265	tr|A0A1L1RMC0|A0A1L1RMC0_CHICK Proteasome subunit alpha type OS=Gallus gallus OX=9031 GN=PSMA1 PE=3 SV=1;sp|O42265|PSA1_CHICK Proteasome subunit alpha type-1 OS=Gallus gallus OX=9031 GN=PSMA1 PE=2 SV=2	NaN	26.8123	10	29.325	0	270.12	2003200000
A0A1L1RME0;A0A1L1RN55	tr|A0A1L1RME0|A0A1L1RME0_CHICK Death domain-containing protein OS=Gallus gallus OX=9031 GN=THOC1 PE=4 SV=1;tr|A0A1L1RN55|A0A1L1RN55_CHICK Death domain-containing protein OS=Gallus gallus OX=9031 GN=THOC1 PE=4 SV=2	18.5896	20.5357	4	76.36	0	26.76	74669000
F1NAP2;A0A1L1RMH6	tr|F1NAP2|F1NAP2_CHICK Dynactin subunit 6 OS=Gallus gallus OX=9031 GN=DCTN6 PE=3 SV=2;tr|A0A1L1RMH6|A0A1L1RMH6_CHICK Dynactin subunit 6 OS=Gallus gallus OX=9031 GN=DCTN6 PE=3 SV=2	NaN	20.2123	1	20.672	0.0070764	5.7885	8503900
A0A3Q2U7T4;A0A3Q2U0U6;A0A1L1RPD0;A0A3Q2U936;F1NZ67;A0A1L1RML2	tr|A0A3Q2U7T4|A0A3Q2U7T4_CHICK Uncharacterized protein OS=Gallus gallus OX=9031 GN=HPF1 PE=3 SV=1;tr|A0A3Q2U0U6|A0A3Q2U0U6_CHICK Uncharacterized protein OS=Gallus gallus OX=9031 GN=HPF1 PE=3 SV=1;tr|A0A1L1RPD0|A0A1L1RPD0_CHICK Uncharacterized protein OS=Ga	NaN	22.448	1	34.64	0.00083126	6.8337	80104000
A0A1L1RMV7;O93344	tr|A0A1L1RMV7|A0A1L1RMV7_CHICK Retinal dehydrogenase 2 OS=Gallus gallus OX=9031 GN=ALDH1A2 PE=3 SV=1;sp|O93344|AL1A2_CHICK Retinal dehydrogenase 2 OS=Gallus gallus OX=9031 GN=ALDH1A2 PE=2 SV=2	NaN	23.2072	3	54.774	0	79.401	222740000
A0A1L1RN63;E1BX11	tr|A0A1L1RN63|A0A1L1RN63_CHICK Microsomal signal peptidase 12 kDa subunit OS=Gallus gallus OX=9031 GN=SPCS1 PE=3 SV=1;tr|E1BX11|E1BX11_CHICK Microsomal signal peptidase 12 kDa subunit OS=Gallus gallus OX=9031 GN=SPCS1 PE=3 SV=3	NaN	24.6497	1	10.627	0	21.985	52642000
E1C8J7;A0A1L1RNA9	tr|E1C8J7|E1C8J7_CHICK Thioredoxin domain-containing protein 14 OS=Gallus gallus OX=9031 GN=TMX2 PE=4 SV=1;tr|A0A1L1RNA9|A0A1L1RNA9_CHICK Thioredoxin domain-containing protein 14 OS=Gallus gallus OX=9031 GN=TMX2 PE=4 SV=2	NaN	18.6792	1	33.878	0.00044072	7.6235	7135800
A0A3Q3B053;A0A1L1RNF8;A0A3Q3AH06	tr|A0A3Q3B053|A0A3Q3B053_CHICK DNA ligase (ATP) OS=Gallus gallus OX=9031 GN=LIG1 PE=3 SV=1;tr|A0A1L1RNF8|A0A1L1RNF8_CHICK DNA ligase (ATP) OS=Gallus gallus OX=9031 GN=LIG1 PE=3 SV=2;tr|A0A3Q3AH06|A0A3Q3AH06_CHICK DNA ligase (ATP) OS=Gallus gallus OX=9031 G	NaN	22.804	6	102.11	0	52.834	373490000
A0A1L1RNU2;A0A1L1RT94	tr|A0A1L1RNU2|A0A1L1RNU2_CHICK 60S ribosomal protein L31 OS=Gallus gallus OX=9031 GN=RPL31 PE=3 SV=2;tr|A0A1L1RT94|A0A1L1RT94_CHICK 60S ribosomal protein L31 OS=Gallus gallus OX=9031 GN=RPL31 PE=3 SV=2	NaN	26.0771	4	15.63	0	37.465	566350000
A0A1L1RNV8	tr|A0A1L1RNV8|A0A1L1RNV8_CHICK MICOS complex subunit OS=Gallus gallus OX=9031 GN=CHCHD3 PE=3 SV=2	NaN	24.7851	4	27.447	0	45.506	404760000
A0A1L1RNV9	tr|A0A1L1RNV9|A0A1L1RNV9_CHICK TPR_REGION domain-containing protein OS=Gallus gallus OX=9031 GN=OGT PE=4 SV=1	NaN	21.3803	1	20.195	0	106.77	24567000
A0A1L1RNZ5	tr|A0A1L1RNZ5|A0A1L1RNZ5_CHICK AAA domain-containing protein OS=Gallus gallus OX=9031 GN=RFC5 PE=3 SV=2	NaN	21.4796	4	37.038	0	28.707	64332000
A0A1L1RP46;A0A1D5PE33	tr|A0A1L1RP46|A0A1L1RP46_CHICK Uncharacterized protein OS=Gallus gallus OX=9031 GN=RAB1B PE=4 SV=2;tr|A0A1D5PE33|A0A1D5PE33_CHICK Uncharacterized protein OS=Gallus gallus OX=9031 GN=RAB1B PE=4 SV=2	NaN	24.8176	5	22.708	0	92.656	443530000
A0A1L1RP66;A0A1L1RYL5	tr|A0A1L1RP66|A0A1L1RP66_CHICK AAA domain-containing protein OS=Gallus gallus OX=9031 GN=PSMC6 PE=3 SV=1;tr|A0A1L1RYL5|A0A1L1RYL5_CHICK AAA domain-containing protein OS=Gallus gallus OX=9031 GN=PSMC6 PE=3 SV=2	NaN	25.1873	14	45.797	0	164.78	878720000
A0A1L1RPC6;A0A1D5PQJ6	tr|A0A1L1RPC6|A0A1L1RPC6_CHICK Vesicle-associated membrane protein-associated protein A OS=Gallus gallus OX=9031 GN=VAPA PE=3 SV=2;tr|A0A1D5PQJ6|A0A1D5PQJ6_CHICK Vesicle-associated membrane protein-associated protein A OS=Gallus gallus OX=9031 GN=VAPA PE=3	NaN	24.9293	4	27.755	0	60.021	447300000
A0A1L1RPC8;A0A3Q2UAQ4	tr|A0A1L1RPC8|A0A1L1RPC8_CHICK Uncharacterized protein OS=Gallus gallus OX=9031 GN=GLMP PE=3 SV=1;tr|A0A3Q2UAQ4|A0A3Q2UAQ4_CHICK Uncharacterized protein OS=Gallus gallus OX=9031 GN=LOC112530283 PE=3 SV=1	NaN	19.6914	1	38.789	0.00045725	8.3454	11853000
A0A1L1RPE8;F1NIJ6;A0A1L1RQ91;A0A1D5PRS4	tr|A0A1L1RPE8|A0A1L1RPE8_CHICK Glucose-6-phosphate isomerase OS=Gallus gallus OX=9031 GN=GPI PE=3 SV=2;tr|F1NIJ6|F1NIJ6_CHICK Glucose-6-phosphate isomerase OS=Gallus gallus OX=9031 GN=GPI PE=3 SV=2;tr|A0A1L1RQ91|A0A1L1RQ91_CHICK Glucose-6-phosphate isomera	NaN	24.708	10	57.43	0	157.5	712590000
A0A1L1RPF1	tr|A0A1L1RPF1|A0A1L1RPF1_CHICK SUN domain-containing protein OS=Gallus gallus OX=9031 GN=LOC428505 PE=4 SV=1	NaN	25.1764	1	27.406	0.00084034	7.0051	606710000
A0A1L1RPJ2;Q5ZIF0	tr|A0A1L1RPJ2|A0A1L1RPJ2_CHICK Protein kinase domain-containing protein OS=Gallus gallus OX=9031 GN=MAP2K1 PE=3 SV=2;tr|Q5ZIF0|Q5ZIF0_CHICK Protein kinase domain-containing protein OS=Gallus gallus OX=9031 GN=MAP2K1 PE=2 SV=1	NaN	20.6331	1	43.635	0.00043309	7.3605	32525000
Q5ZL56;A0A1L1RPL6	tr|Q5ZL56|Q5ZL56_CHICK Uncharacterized protein OS=Gallus gallus OX=9031 GN=ACADS PE=2 SV=1;tr|A0A1L1RPL6|A0A1L1RPL6_CHICK Uncharacterized protein OS=Gallus gallus OX=9031 GN=ACADS PE=3 SV=1	NaN	23.721	8	44.614	0	92.982	304190000
A0A1L1RPP7;E1C1F5	tr|A0A1L1RPP7|A0A1L1RPP7_CHICK WD repeat-containing protein 44 OS=Gallus gallus OX=9031 GN=WDR44 PE=4 SV=2;tr|E1C1F5|E1C1F5_CHICK WD repeat-containing protein 44 OS=Gallus gallus OX=9031 GN=WDR44 PE=4 SV=4	NaN	18.4195	1	95.067	0	16.113	17881000
A0A1L1RPQ6	tr|A0A1L1RPQ6|A0A1L1RPQ6_CHICK Uncharacterized protein OS=Gallus gallus OX=9031 GN=TPM4 PE=3 SV=2	NaN	25.033	5	28.639	0	97.194	514970000
P00508;F1P180;A0A1L1RPR4	sp|P00508|AATM_CHICK Aspartate aminotransferase, mitochondrial OS=Gallus gallus OX=9031 GN=GOT2 PE=1 SV=2;tr|F1P180|F1P180_CHICK Aspartate aminotransferase OS=Gallus gallus OX=9031 GN=GOT2 PE=3 SV=3;tr|A0A1L1RPR4|A0A1L1RPR4_CHICK Aspartate aminotransferase	NaN	28.8288	23	47.241	0	323.31	12397000000
A0A1L1RPU0;E1C7D6;A0A3Q3AUS8	tr|A0A1L1RPU0|A0A1L1RPU0_CHICK Uncharacterized protein OS=Gallus gallus OX=9031 GN=MRPL1 PE=4 SV=2;tr|E1C7D6|E1C7D6_CHICK Uncharacterized protein OS=Gallus gallus OX=9031 GN=MRPL1 PE=4 SV=4;tr|A0A3Q3AUS8|A0A3Q3AUS8_CHICK Uncharacterized protein OS=Gallus g	NaN	22.8186	3	37.856	0	30.57	155350000
P24052;A0A1L1RPU5	sp|P24052|MK_CHICK Midkine OS=Gallus gallus OX=9031 GN=RIHB PE=1 SV=1;tr|A0A1L1RPU5|A0A1L1RPU5_CHICK Uncharacterized protein OS=Gallus gallus OX=9031 GN=MDK PE=3 SV=1	NaN	21.6725	1	15.579	0.00044385	7.7466	20055000
A0A1L1RPY6;Q5ZLA5;A0A1D5PIX9	tr|A0A1L1RPY6|A0A1L1RPY6_CHICK Eukaryotic translation initiation factor 3 subunit E OS=Gallus gallus OX=9031 GN=EIF3E PE=3 SV=1;sp|Q5ZLA5|EIF3E_CHICK Eukaryotic translation initiation factor 3 subunit E OS=Gallus gallus OX=9031 GN=EIF3E PE=2 SV=1;tr|A0A1D5	NaN	25.5054	10	52.148	0	99.008	1333700000
A0A1L1RPZ3	tr|A0A1L1RPZ3|A0A1L1RPZ3_CHICK 5-deoxynucleotidase HDDC2 OS=Gallus gallus OX=9031 GN=HDDC2 PE=3 SV=2	NaN	18.8289	1	22.433	0.00045579	8.214	4656500
P32429;A0A1L1RQ08;A0A452J886	sp|P32429|RL7A_CHICK 60S ribosomal protein L7a OS=Gallus gallus OX=9031 GN=RPL7A PE=2 SV=2;tr|A0A1L1RQ08|A0A1L1RQ08_CHICK 60S ribosomal protein L7a OS=Gallus gallus OX=9031 GN=RPL7A PE=3 SV=1;tr|A0A452J886|A0A452J886_CHICK 60S ribosomal protein L7a OS=Gall	NaN	28.4178	9	29.999	0	96.359	3586100000
A0A1L1RQ64	tr|A0A1L1RQ64|A0A1L1RQ64_CHICK Uncharacterized protein OS=Gallus gallus OX=9031 GN=UBXN4 PE=4 SV=2	NaN	18.9508	1	16.099	0.00043611	7.4856	3040300
A0A1L1RQM9	tr|A0A1L1RQM9|A0A1L1RQM9_CHICK WD_REPEATS_REGION domain-containing protein OS=Gallus gallus OX=9031 GN=AAAS PE=4 SV=2	NaN	21.5246	4	85.99	0	24.909	111620000
A0A1L1RQQ1	tr|A0A1L1RQQ1|A0A1L1RQQ1_CHICK NAD(P)H-hydrate epimerase OS=Gallus gallus OX=9031 GN=APOA1BP PE=3 SV=2	NaN	19.1981	1	25.939	0.00084602	7.0841	7217500
A0A1L1RQR5	tr|A0A1L1RQR5|A0A1L1RQR5_CHICK Uncharacterized protein OS=Gallus gallus OX=9031 GN=MRPS2 PE=3 SV=1	NaN	20.2746	1	21.546	0.00045788	8.4014	12684000
A0A1L1RR91;F1NVY5	tr|A0A1L1RR91|A0A1L1RR91_CHICK J domain-containing protein OS=Gallus gallus OX=9031 GN=DNAJB11 PE=4 SV=2;tr|F1NVY5|F1NVY5_CHICK J domain-containing protein OS=Gallus gallus OX=9031 GN=DNAJB11 PE=4 SV=2	NaN	21.839	2	40.381	0	12.396	60023000
F1NXA7;A0A1L1RRA1	tr|F1NXA7|F1NXA7_CHICK Uncharacterized protein OS=Gallus gallus OX=9031 GN=POLR1E PE=3 SV=2;tr|A0A1L1RRA1|A0A1L1RRA1_CHICK Uncharacterized protein OS=Gallus gallus OX=9031 GN=POLR1E PE=3 SV=2	NaN	18.92	1	46.675	0.000429	7.2811	10416000
A0A1L1RRC3;F1NCC9	tr|A0A1L1RRC3|A0A1L1RRC3_CHICK HMG box domain-containing protein OS=Gallus gallus OX=9031 GN=SMARCE1 PE=4 SV=2;tr|F1NCC9|F1NCC9_CHICK HMG box domain-containing protein OS=Gallus gallus OX=9031 GN=SMARCE1 PE=4 SV=2	NaN	19.7196	1	42.928	0	12.892	16404000
A0A3Q2UIX6;P11799;E1C906;F1NQ78;A0A3Q2TRY1;A0A1L1RRF3	tr|A0A3Q2UIX6|A0A3Q2UIX6_CHICK Myosin light chain kinase, smooth muscle OS=Gallus gallus OX=9031 GN=MYLK PE=3 SV=1;sp|P11799|MYLK_CHICK Myosin light chain kinase, smooth muscle OS=Gallus gallus OX=9031 GN=Mylk PE=1 SV=2;tr|E1C906|E1C906_CHICK Myosin light	NaN	17.8168	1	207.35	0.0012265	6.661	22858000
A0A1L1RRM0	tr|A0A1L1RRM0|A0A1L1RRM0_CHICK Uncharacterized protein OS=Gallus gallus OX=9031 GN=VTA1 PE=3 SV=2	NaN	21.4036	2	42.897	0	24.762	49936000
P24367;A0A1L1RRN4	sp|P24367|PPIB_CHICK Peptidyl-prolyl cis-trans isomerase B OS=Gallus gallus OX=9031 GN=PPIB PE=2 SV=1;tr|A0A1L1RRN4|A0A1L1RRN4_CHICK Peptidyl-prolyl cis-trans isomerase OS=Gallus gallus OX=9031 GN=PPIB PE=3 SV=2	NaN	26.2624	7	22.413	0	102.78	965980000
Q5ZHW3;A0A1L1RRQ2	tr|Q5ZHW3|Q5ZHW3_CHICK WD_REPEATS_REGION domain-containing protein OS=Gallus gallus OX=9031 GN=BUB3 PE=2 SV=1;tr|A0A1L1RRQ2|A0A1L1RRQ2_CHICK WD_REPEATS_REGION domain-containing protein OS=Gallus gallus OX=9031 GN=BUB3 PE=4 SV=1	26.6214	25.8289	10	37.28	0	172.04	2442600000
E1C3C8;A0A1L1RRQ3	tr|E1C3C8|E1C3C8_CHICK Uncharacterized protein OS=Gallus gallus OX=9031 GN=KIFAP3 PE=4 SV=4;tr|A0A1L1RRQ3|A0A1L1RRQ3_CHICK Uncharacterized protein OS=Gallus gallus OX=9031 GN=KIFAP3 PE=4 SV=2	NaN	18.4408	1	88.293	0.00047438	9.8631	11030000
A0A1L1RRY6	tr|A0A1L1RRY6|A0A1L1RRY6_CHICK THUMP domain-containing protein OS=Gallus gallus OX=9031 GN=THUMPD3 PE=3 SV=2	NaN	21.1783	3	54.878	0	15.949	49835000
A0A1L1RS10	tr|A0A1L1RS10|A0A1L1RS10_CHICK RRP7 domain-containing protein OS=Gallus gallus OX=9031 GN=RRP7A PE=3 SV=2	NaN	20.8397	1	31.176	0.00043459	7.4567	31902000
P43233;A0A1L1RS19	sp|P43233|CATB_CHICK Cathepsin B OS=Gallus gallus OX=9031 GN=CTSB PE=2 SV=1;tr|A0A1L1RS19|A0A1L1RS19_CHICK Cathepsin B OS=Gallus gallus OX=9031 GN=CTSB PE=3 SV=2	NaN	24.7526	2	37.587	0	30.615	537060000
A0A1L1RS21	tr|A0A1L1RS21|A0A1L1RS21_CHICK DAO domain-containing protein OS=Gallus gallus OX=9031 GN=FOXRED1 PE=4 SV=1	NaN	20.8028	2	54.567	0	13.147	29268000
A0A1L1RS34;A0A1D5PP80	tr|A0A1L1RS34|A0A1L1RS34_CHICK DNA-directed RNA polymerases I and III subunit RPAC1 OS=Gallus gallus OX=9031 GN=POLR1C PE=3 SV=1;tr|A0A1D5PP80|A0A1D5PP80_CHICK DNA-directed RNA polymerases I and III subunit RPAC1 OS=Gallus gallus OX=9031 GN=POLR1C PE=3 SV=	NaN	21.7265	5	39.379	0	32.943	55521000
E1BZH9;A0A1L1RS37	tr|E1BZH9|E1BZH9_CHICK Uncharacterized protein OS=Gallus gallus OX=9031 GN=HADH PE=3 SV=1;tr|A0A1L1RS37|A0A1L1RS37_CHICK Uncharacterized protein OS=Gallus gallus OX=9031 GN=HADH PE=3 SV=2	NaN	26.9442	8	34.421	0	121.32	1807900000
A0A3Q2TVC7;A0A1L1RS61	tr|A0A3Q2TVC7|A0A3Q2TVC7_CHICK Peroxin-14 OS=Gallus gallus OX=9031 GN=PEX14 PE=3 SV=1;tr|A0A1L1RS61|A0A1L1RS61_CHICK Peroxin-14 OS=Gallus gallus OX=9031 GN=PEX14 PE=3 SV=2	NaN	20.3688	1	39.402	0	42.133	20310000
A0A1L1RS76;F1NY29	tr|A0A1L1RS76|A0A1L1RS76_CHICK Electron transfer flavoprotein-ubiquinone oxidoreductase OS=Gallus gallus OX=9031 GN=ETFDH PE=4 SV=2;tr|F1NY29|F1NY29_CHICK Electron transfer flavoprotein-ubiquinone oxidoreductase OS=Gallus gallus OX=9031 GN=ETFDH PE=4 SV=3	NaN	23.6658	8	61.428	0	61.034	399250000
Q5ZMU0;A0A1L1RS93	sp|Q5ZMU0|RT07_CHICK 28S ribosomal protein S7, mitochondrial OS=Gallus gallus OX=9031 GN=MRPS7 PE=2 SV=2;tr|A0A1L1RS93|A0A1L1RS93_CHICK 28S ribosomal protein S7, mitochondrial OS=Gallus gallus OX=9031 GN=MRPS7 PE=3 SV=2	NaN	22.8759	4	27.279	0	29.505	84667000
A0A1L1RSA2;F1NHD8	tr|A0A1L1RSA2|A0A1L1RSA2_CHICK Uncharacterized protein OS=Gallus gallus OX=9031 GN=PDCD6 PE=4 SV=2;tr|F1NHD8|F1NHD8_CHICK Uncharacterized protein OS=Gallus gallus OX=9031 GN=PDCD6 PE=4 SV=2	NaN	19.8569	1	19.692	0.00046664	9.195	6647000
A0A1L1RSD2	tr|A0A1L1RSD2|A0A1L1RSD2_CHICK Uncharacterized protein OS=Gallus gallus OX=9031 GN=GUSB PE=3 SV=2	NaN	17.962	1	75.906	0.00044703	7.8795	8170600
Q5ZK84;A0A1L1RSF4;A0A1L1RXF9;F1N9F8;A0A1L1RPK9	sp|Q5ZK84|AK1A1_CHICK Aldo-keto reductase family 1 member A1 OS=Gallus gallus OX=9031 GN=AKR1A1 PE=2 SV=1;tr|A0A1L1RSF4|A0A1L1RSF4_CHICK Aldo-keto reductase family 1 member A1 OS=Gallus gallus OX=9031 GN=AKR1A1 PE=3 SV=1;tr|A0A1L1RXF9|A0A1L1RXF9_CHICK Aldo	NaN	23.2931	5	37.076	0	46.77	205560000
A0A1L1RSG1	tr|A0A1L1RSG1|A0A1L1RSG1_CHICK Cytochrome c oxidase subunit OS=Gallus gallus OX=9031 GN=COX6A1 PE=3 SV=1	NaN	22.07	1	11.815	0.00084282	7.0515	26416000
Q5ZKC9;A0A1L1RSI2	sp|Q5ZKC9|1433Z_CHICK 14-3-3 protein zeta OS=Gallus gallus OX=9031 GN=YWHAZ PE=2 SV=1;tr|A0A1L1RSI2|A0A1L1RSI2_CHICK 14-3-3 protein zeta OS=Gallus gallus OX=9031 GN=YWHAZ PE=3 SV=2	NaN	25.2773	6	27.775	0	115.88	569330000
A0A1L1RSP5;Q5ZM92;F1NTG9	tr|A0A1L1RSP5|A0A1L1RSP5_CHICK Uncharacterized protein OS=Gallus gallus OX=9031 GN=DAZAP1 PE=4 SV=2;tr|Q5ZM92|Q5ZM92_CHICK Uncharacterized protein OS=Gallus gallus OX=9031 GN=DAZAP1 PE=2 SV=1;tr|F1NTG9|F1NTG9_CHICK Uncharacterized protein OS=Gallus gallus	NaN	23.8543	2	40.699	0	35.904	136490000
E1BTF5;A0A1L1RSS5	tr|E1BTF5|E1BTF5_CHICK DAGKc domain-containing protein OS=Gallus gallus OX=9031 GN=AGK PE=4 SV=4;tr|A0A1L1RSS5|A0A1L1RSS5_CHICK DAGKc domain-containing protein OS=Gallus gallus OX=9031 GN=AGK PE=4 SV=2	NaN	18.4564	1	41.132	0.00043029	7.2942	6474300
A0A1L1RT07	tr|A0A1L1RT07|A0A1L1RT07_CHICK Beta-N-acetylhexosaminidase OS=Gallus gallus OX=9031 GN=HEXA PE=3 SV=2	NaN	18.3773	2	70.601	0	12.176	11577000
A0A1L1RTK9	tr|A0A1L1RTK9|A0A1L1RTK9_CHICK RRM domain-containing protein OS=Gallus gallus OX=9031 GN=EIF4B PE=4 SV=2	NaN	24.6139	9	97.948	0	124.47	821620000
E1BVC8;A0A1L1RTL0	tr|E1BVC8|E1BVC8_CHICK Secretory carrier-associated membrane protein OS=Gallus gallus OX=9031 GN=SCAMP1 PE=3 SV=2;tr|A0A1L1RTL0|A0A1L1RTL0_CHICK Secretory carrier-associated membrane protein OS=Gallus gallus OX=9031 GN=SCAMP1 PE=3 SV=2	NaN	19.5802	2	48.477	0	23.197	19596000
A0A1L1RTR9	tr|A0A1L1RTR9|A0A1L1RTR9_CHICK Uncharacterized protein OS=Gallus gallus OX=9031 GN=MRPL12 PE=3 SV=1	NaN	26.199	5	20.471	0	38.478	385190000
A0A1L1RU28;O73775;F1NX60	tr|A0A1L1RU28|A0A1L1RU28_CHICK Fibulin-1 OS=Gallus gallus OX=9031 GN=FBLN1 PE=3 SV=1;sp|O73775|FBLN1_CHICK Fibulin-1 OS=Gallus gallus OX=9031 GN=FBLN1 PE=2 SV=2;tr|F1NX60|F1NX60_CHICK Fibulin-1 OS=Gallus gallus OX=9031 GN=FBLN1 PE=3 SV=1	NaN	19.5412	1	75.654	0.00082136	6.7081	25940000
A0A1L1RU52	tr|A0A1L1RU52|A0A1L1RU52_CHICK Tropomyosin alpha-1 chain OS=Gallus gallus OX=9031 GN=TPM1 PE=3 SV=2	NaN	21.2712	2	28.753	0	15.953	37962000
A0A1L1RUB9	tr|A0A1L1RUB9|A0A1L1RUB9_CHICK AAA domain-containing protein OS=Gallus gallus OX=9031 GN=RFC4 PE=3 SV=2	NaN	23.358	7	39.722	0	53.794	215010000
A0A1L1RUE7	tr|A0A1L1RUE7|A0A1L1RUE7_CHICK Proteasome subunit beta OS=Gallus gallus OX=9031 GN=LOC107049719 PE=3 SV=2	NaN	22.1199	1	21.314	0	28.659	41020000
Q5ZIY8;A0A1L1RUF2	tr|Q5ZIY8|Q5ZIY8_CHICK Ribonuclease inhibitor OS=Gallus gallus OX=9031 GN=RNH1 PE=1 SV=1;tr|A0A1L1RUF2|A0A1L1RUF2_CHICK Ribonuclease inhibitor OS=Gallus gallus OX=9031 GN=RNH1 PE=4 SV=2	NaN	22.8562	5	49.863	0	68.803	189820000
A0A1L1RUT1	tr|A0A1L1RUT1|A0A1L1RUT1_CHICK Coatomer subunit beta OS=Gallus gallus OX=9031 GN=COPB2 PE=3 SV=2	NaN	23.7161	13	103.14	0	115.98	675220000
A0A1L1RUW1	tr|A0A1L1RUW1|A0A1L1RUW1_CHICK Uncharacterized protein OS=Gallus gallus OX=9031 GN=RAB34 PE=4 SV=1	NaN	21.6829	1	29.018	0.00083299	6.8578	53869000
Q5ZKJ3;A0A1L1RY20;A0A1L1RUW7	tr|Q5ZKJ3|Q5ZKJ3_CHICK Deoxyuridine 5-triphosphate nucleotidohydrolase OS=Gallus gallus OX=9031 GN=DUT PE=2 SV=1;tr|A0A1L1RY20|A0A1L1RY20_CHICK Deoxyuridine 5-triphosphate nucleotidohydrolase OS=Gallus gallus OX=9031 GN=DUT PE=3 SV=2;tr|A0A1L1RUW7|A0A1L1	NaN	21.3793	2	17.796	0	16.516	27278000
A0A3Q3AU54;E1BWC6;A0A1L1RUY6;A0A3Q2UC87	tr|A0A3Q3AU54|A0A3Q3AU54_CHICK Uncharacterized protein OS=Gallus gallus OX=9031 GN=MICU1 PE=4 SV=1;tr|E1BWC6|E1BWC6_CHICK Uncharacterized protein OS=Gallus gallus OX=9031 GN=MICU1 PE=4 SV=1;tr|A0A1L1RUY6|A0A1L1RUY6_CHICK Uncharacterized protein OS=Gallus g	NaN	22.2165	2	21.776	0	20.536	58482000
A0A1L1RV30	tr|A0A1L1RV30|A0A1L1RV30_CHICK Uncharacterized protein OS=Gallus gallus OX=9031 GN=SDF2L1 PE=4 SV=1	NaN	21.4791	2	21.229	0	12.003	26309000
A0A1L1RV86	tr|A0A1L1RV86|A0A1L1RV86_CHICK Death domain-containing protein OS=Gallus gallus OX=9031 GN=TNFRSF14 PE=4 SV=2	NaN	24.8413	3	32.992	0	68.698	450890000
A0A1L1RVJ6	tr|A0A1L1RVJ6|A0A1L1RVJ6_CHICK Sulfotransferase OS=Gallus gallus OX=9031 GN=SULT6B1 PE=3 SV=2	NaN	22.8909	1	37.441	0.00044524	7.7684	171100000
A0A1L1RVP3	tr|A0A1L1RVP3|A0A1L1RVP3_CHICK CHCH domain-containing protein OS=Gallus gallus OX=9031 GN=CHCHD2P9 PE=4 SV=1	NaN	24.5592	1	15.248	0	24.976	123610000
A0A1L1RVU7;A0A1D5PV56;Q5ZLJ7;A0A1D5P9B0;A0A1D5P2B9;A0A1L1RJZ6	tr|A0A1L1RVU7|A0A1L1RVU7_CHICK Uncharacterized protein OS=Gallus gallus OX=9031 GN=TPM3 PE=3 SV=1;tr|A0A1D5PV56|A0A1D5PV56_CHICK Uncharacterized protein OS=Gallus gallus OX=9031 GN=TPM3 PE=3 SV=1;tr|Q5ZLJ7|Q5ZLJ7_CHICK Uncharacterized protein OS=Gallus gal	24.4504	27.1743	10	29.022	0	323.31	2790000000
A0A1L1RVW9;F1NY41	tr|A0A1L1RVW9|A0A1L1RVW9_CHICK Uncharacterized protein OS=Gallus gallus OX=9031 GN=BAG3 PE=4 SV=2;tr|F1NY41|F1NY41_CHICK Uncharacterized protein OS=Gallus gallus OX=9031 GN=BAG3 PE=4 SV=2	NaN	21.6384	3	47.07	0	22.202	75084000
A0A1L1RVY5;F1NZ34	tr|A0A1L1RVY5|A0A1L1RVY5_CHICK Uncharacterized protein OS=Gallus gallus OX=9031 GN=NUP54 PE=4 SV=2;tr|F1NZ34|F1NZ34_CHICK Uncharacterized protein OS=Gallus gallus OX=9031 GN=NUP54 PE=4 SV=5	NaN	20.0832	3	55.228	0	18.754	29992000
A0A1L1RVZ0	tr|A0A1L1RVZ0|A0A1L1RVZ0_CHICK 28S ribosomal protein S15, mitochondrial OS=Gallus gallus OX=9031 PE=3 SV=2	NaN	22.8114	2	20.092	0	13.096	58885000
A0A1L1RW10;E1BTV4	tr|A0A1L1RW10|A0A1L1RW10_CHICK SEC14 and spectrin domain containing 1 OS=Gallus gallus OX=9031 GN=SESTD1 PE=4 SV=2;tr|E1BTV4|E1BTV4_CHICK CRAL-TRIO domain-containing protein OS=Gallus gallus OX=9031 GN=SESTD1 PE=4 SV=2	NaN	17.0179	1	79.288	0.0024087	6.43	4512200
E1BVT7;A0A1L1RW32	tr|E1BVT7|E1BVT7_CHICK Uncharacterized protein OS=Gallus gallus OX=9031 GN=MRPL18 PE=4 SV=1;tr|A0A1L1RW32|A0A1L1RW32_CHICK Uncharacterized protein OS=Gallus gallus OX=9031 GN=MRPL18 PE=4 SV=2	NaN	23.4885	3	20.856	0	32.896	153000000
F1NC38;A0A1L1RW35	tr|F1NC38|F1NC38_CHICK Long-chain specific acyl-CoA dehydrogenase, mitochondrial OS=Gallus gallus OX=9031 GN=ACADL PE=3 SV=1;tr|A0A1L1RW35|A0A1L1RW35_CHICK Long-chain specific acyl-CoA dehydrogenase, mitochondrial OS=Gallus gallus OX=9031 GN=ACADL PE=3 SV=	NaN	24.0589	6	47.873	0	91.164	349520000
A0A1L1RWB5	tr|A0A1L1RWB5|A0A1L1RWB5_CHICK PPIase cyclophilin-type domain-containing protein OS=Gallus gallus OX=9031 GN=CWC27 PE=4 SV=2	NaN	19.9876	1	55.126	0	16.606	17674000
A0A1L1RWF6	tr|A0A1L1RWF6|A0A1L1RWF6_CHICK Calponin OS=Gallus gallus OX=9031 GN=CNN3 PE=3 SV=2	NaN	27.1975	10	36.61	0	238.68	2308600000
A0A1L1RWG9;O93256	tr|A0A1L1RWG9|A0A1L1RWG9_CHICK IF rod domain-containing protein OS=Gallus gallus OX=9031 GN=KRT24 PE=3 SV=2;sp|O93256|K1C19_CHICK Keratin, type I cytoskeletal 19 OS=Gallus gallus OX=9031 GN=KRT19 PE=2 SV=1	24.8051	26.8949	14	46.038	0	323.31	4160700000
A0A1L1RWJ7;A0A1D5NTN7	tr|A0A1L1RWJ7|A0A1L1RWJ7_CHICK Uncharacterized protein OS=Gallus gallus OX=9031 GN=PLAA PE=3 SV=2;tr|A0A1D5NTN7|A0A1D5NTN7_CHICK Uncharacterized protein OS=Gallus gallus OX=9031 GN=PLAA PE=3 SV=1	NaN	19.2429	3	87.25	0	20.396	29781000
F1NQV5;A0A1L1RWS6	tr|F1NQV5|F1NQV5_CHICK RNA helicase OS=Gallus gallus OX=9031 GN=DDX27 PE=3 SV=1;tr|A0A1L1RWS6|A0A1L1RWS6_CHICK RNA helicase OS=Gallus gallus OX=9031 GN=DDX27 PE=3 SV=2	NaN	21.7007	8	85.637	0	69.826	139750000
A0A1L1RWX6	tr|A0A1L1RWX6|A0A1L1RWX6_CHICK 4HBT domain-containing protein OS=Gallus gallus OX=9031 GN=ACOT13 PE=3 SV=2	NaN	22.0404	2	15.486	0	14.658	34507000
A0A1L1RWX8;F1NVF0	tr|A0A1L1RWX8|A0A1L1RWX8_CHICK Vacuolar protein sorting-associated protein 35 OS=Gallus gallus OX=9031 GN=VPS35 PE=3 SV=2;tr|F1NVF0|F1NVF0_CHICK Vacuolar protein sorting-associated protein 35 OS=Gallus gallus OX=9031 GN=VPS35 PE=3 SV=2	NaN	22.9511	6	91.74	0	132.69	332470000
A0A1L1RWY1	tr|A0A1L1RWY1|A0A1L1RWY1_CHICK Uncharacterized protein OS=Gallus gallus OX=9031 GN=MRPL47 PE=3 SV=2	NaN	21.0307	2	29.391	0	15.604	36420000
A0A1L1RWZ8	tr|A0A1L1RWZ8|A0A1L1RWZ8_CHICK Coiled-coil domain-containing protein 58 OS=Gallus gallus OX=9031 GN=CCDC58 PE=3 SV=1	NaN	20.2824	1	14.298	0.00043573	7.4824	7651700
A0A1L1RX26	tr|A0A1L1RX26|A0A1L1RX26_CHICK Eukaryotic peptide chain release factor subunit 1 OS=Gallus gallus OX=9031 GN=ETF1 PE=3 SV=1	NaN	23.6902	4	49.03	0	104.96	338370000
A0A1L1RX65	tr|A0A1L1RX65|A0A1L1RX65_CHICK Isocitrate dehydrogenase [NAD] subunit, mitochondrial OS=Gallus gallus OX=9031 GN=IDH3A PE=3 SV=2	NaN	24.2691	7	39.79	0	88.154	384130000
Q5ZIZ4;A0A1L1RX72;F1NCR3;A0A1D5PTE9	sp|Q5ZIZ4|5NTC_CHICK Cytosolic purine 5-nucleotidase OS=Gallus gallus OX=9031 GN=NT5C2 PE=2 SV=1;tr|A0A1L1RX72|A0A1L1RX72_CHICK Cytosolic purine 5-nucleotidase OS=Gallus gallus OX=9031 GN=NT5C2 PE=3 SV=2;tr|F1NCR3|F1NCR3_CHICK Cytosolic purine 5-nucleot	NaN	20.6523	3	65.894	0	19.459	49439000
P28675;A0A1L1RX77	sp|P28675|PGS2_CHICK Decorin OS=Gallus gallus OX=9031 GN=DCN PE=1 SV=1;tr|A0A1L1RX77|A0A1L1RX77_CHICK Decorin OS=Gallus gallus OX=9031 GN=DCN PE=3 SV=2	NaN	18.0226	1	39.686	0.0012215	6.6021	5059400
F1NJS6;A0A1L1RX89	tr|F1NJS6|F1NJS6_CHICK Importin subunit alpha OS=Gallus gallus OX=9031 GN=KPNA2 PE=3 SV=2;tr|A0A1L1RX89|A0A1L1RX89_CHICK Importin subunit alpha OS=Gallus gallus OX=9031 GN=KPNA2 PE=3 SV=1	NaN	24.3253	8	55.944	0	88.965	420430000
A0A1L1RXA3	tr|A0A1L1RXA3|A0A1L1RXA3_CHICK Ubiquitin carboxyl-terminal hydrolase OS=Gallus gallus OX=9031 GN=UCHL3 PE=3 SV=2	NaN	22.3145	3	26.288	0	45.817	62592000
A0A1L1RXE9;F1P582	tr|A0A1L1RXE9|A0A1L1RXE9_CHICK Uncharacterized protein OS=Gallus gallus OX=9031 GN=UQCRC2 PE=4 SV=2;tr|F1P582|F1P582_CHICK Uncharacterized protein OS=Gallus gallus OX=9031 GN=UQCRC2 PE=1 SV=1	NaN	26.909	12	45.772	0	266.49	2898300000
A0A1L1RXF5	tr|A0A1L1RXF5|A0A1L1RXF5_CHICK Uncharacterized protein OS=Gallus gallus OX=9031 GN=TIAL1 PE=4 SV=1	NaN	23.6079	3	41.098	0	40.786	204560000
A0A1L1RXQ1	tr|A0A1L1RXQ1|A0A1L1RXQ1_CHICK TPR_REGION domain-containing protein OS=Gallus gallus OX=9031 GN=CDC23 PE=4 SV=1	NaN	18.1232	1	67.7	0.00083403	6.8822	9422100
A0A1L1RXX7	tr|A0A1L1RXX7|A0A1L1RXX7_CHICK Mitochondrial genome maintenance exonuclease 1 OS=Gallus gallus OX=9031 GN=MGME1 PE=3 SV=2	NaN	19.0735	1	39.512	0.0004531	8.0918	9378600
A0A1L1RXY9;Q5F3X4;A0A1L1RYY6	tr|A0A1L1RXY9|A0A1L1RXY9_CHICK 116 kDa U5 small nuclear ribonucleoprotein component OS=Gallus gallus OX=9031 GN=EFTUD2 PE=3 SV=2;sp|Q5F3X4|U5S1_CHICK 116 kDa U5 small nuclear ribonucleoprotein component OS=Gallus gallus OX=9031 GN=EFTUD2 PE=2 SV=1;tr|A0A1L	19.7842	23.5366	17	104.38	0	151.16	666630000
Q5ZLC5;A0A1L1RY04	sp|Q5ZLC5|ATPB_CHICK ATP synthase subunit beta, mitochondrial OS=Gallus gallus OX=9031 GN=ATP5F1B PE=1 SV=1;tr|A0A1L1RY04|A0A1L1RY04_CHICK ATP synthase subunit beta OS=Gallus gallus OX=9031 GN=ATP5B PE=3 SV=2	21.2192	29.9896	26	56.627	0	323.31	30985000000
E1C4X6;A0A1L1RY70	tr|E1C4X6|E1C4X6_CHICK Midasin OS=Gallus gallus OX=9031 GN=MDN1 PE=3 SV=4;tr|A0A1L1RY70|A0A1L1RY70_CHICK Midasin OS=Gallus gallus OX=9031 GN=MDN1 PE=3 SV=2	NaN	17.6223	2	628.66	0	11.528	57704000
A0A1L1RY74	tr|A0A1L1RY74|A0A1L1RY74_CHICK Mago-bind domain-containing protein OS=Gallus gallus OX=9031 GN=PYM1 PE=3 SV=2	NaN	24.346	4	23.027	0	103.61	191910000
A0A3Q2U186;A0A1L1RYC4	tr|A0A3Q2U186|A0A3Q2U186_CHICK Biogenesis of lysosome-related organelles complex 1 subunit 5 OS=Gallus gallus OX=9031 GN=BLOC1S5 PE=4 SV=1;tr|A0A1L1RYC4|A0A1L1RYC4_CHICK Biogenesis of lysosome-related organelles complex 1 subunit 5 OS=Gallus gallus OX=9031	NaN	23.0874	2	22.875	0	30.183	106950000
A0A1L1RYF4	tr|A0A1L1RYF4|A0A1L1RYF4_CHICK Uncharacterized protein OS=Gallus gallus OX=9031 GN=HNRNPH2 PE=4 SV=1	NaN	20.3352	1	53.106	0	27.71	25133000
A0A1L1RYK0;A0A1D5P0U8	tr|A0A1L1RYK0|A0A1L1RYK0_CHICK ATP synthase subunit gamma OS=Gallus gallus OX=9031 GN=ATP5C1 PE=3 SV=1;tr|A0A1D5P0U8|A0A1D5P0U8_CHICK ATP synthase subunit gamma OS=Gallus gallus OX=9031 GN=ATP5C1 PE=3 SV=1	NaN	26.1756	10	32.723	0	117.27	1136900000
A0A1L1RYV5	tr|A0A1L1RYV5|A0A1L1RYV5_CHICK tRNA (guanine-N(7)-)-methyltransferase non-catalytic subunit WDR4 OS=Gallus gallus OX=9031 GN=WDR4 PE=3 SV=1	NaN	20.7809	1	46.9	0.002365	6.2555	34232000
Q5ZKC1;A0A1L1RYW0	sp|Q5ZKC1|EIF2A_CHICK Eukaryotic translation initiation factor 2A OS=Gallus gallus OX=9031 GN=EIF2A PE=2 SV=1;tr|A0A1L1RYW0|A0A1L1RYW0_CHICK Eukaryotic translation initiation factor 2A OS=Gallus gallus OX=9031 GN=EIF2A PE=3 SV=1	NaN	23.4048	7	64.503	0	78.058	322060000
A0A1L1RYW1	tr|A0A1L1RYW1|A0A1L1RYW1_CHICK BCS1-like protein OS=Gallus gallus OX=9031 GN=BCS1L PE=3 SV=2	NaN	21.2354	2	47.486	0	14.125	61720000
Q5ZHP3;A0A1L1RZ23	sp|Q5ZHP3|CFA20_CHICK Cilia- and flagella-associated protein 20 OS=Gallus gallus OX=9031 GN=CFAP20 PE=2 SV=1;tr|A0A1L1RZ23|A0A1L1RZ23_CHICK Cilia- and flagella-associated protein 20 OS=Gallus gallus OX=9031 GN=CFAP20 PE=4 SV=2	NaN	19.3468	1	22.734	0.001221	6.5951	8001200
A0A1L1RZ58	tr|A0A1L1RZ58|A0A1L1RZ58_CHICK Coiled-coil domain-containing protein 58 OS=Gallus gallus OX=9031 GN=CCDC58 PE=3 SV=2	NaN	20.9505	1	38.383	0	39.649	36475000
O42283;A0A1L1RZ94	tr|O42283|O42283_CHICK 10 kDa heat shock protein, mitochondrial OS=Gallus gallus OX=9031 GN=HSPE1 PE=2 SV=1;tr|A0A1L1RZ94|A0A1L1RZ94_CHICK 10 kDa heat shock protein, mitochondrial OS=Gallus gallus OX=9031 GN=HSPE1 PE=3 SV=2	NaN	27.193	5	11.083	0	54.455	1074000000
Q5ZJV3;A0A1L1RZR2	tr|Q5ZJV3|Q5ZJV3_CHICK Uncharacterized protein OS=Gallus gallus OX=9031 GN=DNAJA1 PE=2 SV=1;tr|A0A1L1RZR2|A0A1L1RZR2_CHICK Uncharacterized protein OS=Gallus gallus OX=9031 GN=DNAJA1 PE=3 SV=2	NaN	21.4423	1	44.706	0.0012175	6.5379	56992000
A0A1L1RZS5;A0A3Q2UGT8	tr|A0A1L1RZS5|A0A1L1RZS5_CHICK 2-iminobutanoate/2-iminopropanoate deaminase OS=Gallus gallus OX=9031 GN=RIDA PE=3 SV=1;tr|A0A3Q2UGT8|A0A3Q2UGT8_CHICK 2-iminobutanoate/2-iminopropanoate deaminase OS=Gallus gallus OX=9031 GN=RIDA PE=3 SV=1	NaN	23.7781	2	14.821	0	28.683	115080000
A0A1L1RZU5	tr|A0A1L1RZU5|A0A1L1RZU5_CHICK GrpE protein homolog OS=Gallus gallus OX=9031 GN=GRPEL1 PE=3 SV=2	NaN	23.5406	3	26.527	0	30.086	183030000
A0A1L1RZU7	tr|A0A1L1RZU7|A0A1L1RZU7_CHICK Ribosomal RNA-processing protein 4 OS=Gallus gallus OX=9031 GN=EXOSC2 PE=3 SV=2	NaN	19.5476	1	32.437	0.0023603	6.2396	13027000
A0A1L1RZW1;A0A1L1RKA6	tr|A0A1L1RZW1|A0A1L1RZW1_CHICK Voltage-dependent anion-selective channel protein 3 OS=Gallus gallus OX=9031 GN=VDAC3 PE=3 SV=2;tr|A0A1L1RKA6|A0A1L1RKA6_CHICK Voltage-dependent anion-selective channel protein 3 OS=Gallus gallus OX=9031 GN=VDAC3 PE=3 SV=1	NaN	25.5691	9	30.403	0	145.04	696930000
A0A1L1S002;F1NG10	tr|A0A1L1S002|A0A1L1S002_CHICK Uncharacterized protein OS=Gallus gallus OX=9031 GN=ACTR10 PE=3 SV=1;tr|F1NG10|F1NG10_CHICK Uncharacterized protein OS=Gallus gallus OX=9031 GN=ACTR10 PE=3 SV=1	NaN	19.3802	2	44.271	0	18.046	12965000
A0A1L1S091	tr|A0A1L1S091|A0A1L1S091_CHICK Uncharacterized protein OS=Gallus gallus OX=9031 GN=PEBP1 PE=3 SV=2	NaN	24.2684	3	20.729	0	22.147	222270000
A0A1L1S0C3;P01038;R4GLT1	tr|A0A1L1S0C3|A0A1L1S0C3_CHICK Cystatin domain-containing protein OS=Gallus gallus OX=9031 GN=CST3 PE=4 SV=2;sp|P01038|CYT_CHICK Cystatin OS=Gallus gallus OX=9031 PE=1 SV=2;tr|R4GLT1|R4GLT1_CHICK Cystatin domain-containing protein OS=Gallus gallus OX=9031	NaN	25.2351	2	13.71	0	70.057	276440000
A0A1L1S0C5	tr|A0A1L1S0C5|A0A1L1S0C5_CHICK Sorting nexin-1 OS=Gallus gallus OX=9031 GN=SNX1 PE=3 SV=1	NaN	22.9524	4	58.092	0	70.569	211030000
E1BT00;A0A1L1S0D5	tr|E1BT00|E1BT00_CHICK V-type proton ATPase subunit D OS=Gallus gallus OX=9031 GN=ATP6V1D PE=3 SV=3;tr|A0A1L1S0D5|A0A1L1S0D5_CHICK V-type proton ATPase subunit D OS=Gallus gallus OX=9031 GN=ATP6V1D PE=3 SV=1	NaN	21.9457	2	25.653	0	23.378	56553000
A0A1L1S0D8;F1P5K0;A0A1D5PRK6	tr|A0A1L1S0D8|A0A1L1S0D8_CHICK Polypyrimidine tract-binding protein 1 OS=Gallus gallus OX=9031 GN=PTBP1 PE=4 SV=1;tr|F1P5K0|F1P5K0_CHICK Polypyrimidine tract-binding protein 1 OS=Gallus gallus OX=9031 GN=PTBP1 PE=4 SV=3;tr|A0A1D5PRK6|A0A1D5PRK6_CHICK Uncha	21.2478	26.0885	13	59.898	0	218.79	1403000000
Q9PUF6;F1N870;A0A1L1S0E6	sp|Q9PUF6|PGFRA_CHICK Platelet-derived growth factor receptor alpha OS=Gallus gallus OX=9031 GN=PDGFRA PE=2 SV=1;tr|F1N870|F1N870_CHICK Platelet-derived growth factor receptor alpha OS=Gallus gallus OX=9031 GN=PDGFRA PE=3 SV=2;tr|A0A1L1S0E6|A0A1L1S0E6_CHIC	NaN	18.3804	1	122.94	0.006734	5.8179	17403000
A0A1L1S0P1	tr|A0A1L1S0P1|A0A1L1S0P1_CHICK Uncharacterized protein OS=Gallus gallus OX=9031 GN=PIT54 PE=4 SV=2	NaN	20.3877	2	50.847	0	18.301	32927000
P32046;A0A1L1S0Q5	sp|P32046|RL37A_CHICK 60S ribosomal protein L37a OS=Gallus gallus OX=9031 GN=RPL37A PE=3 SV=2;tr|A0A1L1S0Q5|A0A1L1S0Q5_CHICK 60S ribosomal protein L37a OS=Gallus gallus OX=9031 GN=RPL37A PE=3 SV=2	NaN	24.8963	1	10.247	0	83.965	124910000
A0A1L1S0V6;F1NYA2	tr|A0A1L1S0V6|A0A1L1S0V6_CHICK Eukaryotic translation initiation factor 4H OS=Gallus gallus OX=9031 GN=EIF4H PE=4 SV=2;tr|F1NYA2|F1NYA2_CHICK Eukaryotic translation initiation factor 4H OS=Gallus gallus OX=9031 GN=EIF4H PE=4 SV=2	NaN	25.1095	6	25.423	0	167.67	434400000
A0A1L1S0X5	tr|A0A1L1S0X5|A0A1L1S0X5_CHICK 60S ribosomal protein L34 OS=Gallus gallus OX=9031 GN=RPL34 PE=3 SV=2	NaN	25.8452	2	13.306	0	13.805	361680000
A0A3Q2TRP9;A0A3Q2TRZ9;A0A3Q2U3E6;A0A1D5PR95;A0A3Q2U573	tr|A0A3Q2TRP9|A0A3Q2TRP9_CHICK Uncharacterized protein OS=Gallus gallus OX=9031 GN=ILF3 PE=4 SV=1;tr|A0A3Q2TRZ9|A0A3Q2TRZ9_CHICK Uncharacterized protein OS=Gallus gallus OX=9031 GN=ILF3 PE=4 SV=1;tr|A0A3Q2U3E6|A0A3Q2U3E6_CHICK Uncharacterized protein OS=Ga	NaN	24.2945	11	95.294	0	99.953	843630000
A0A3Q2TS28	tr|A0A3Q2TS28|A0A3Q2TS28_CHICK Protein HGH1 homolog OS=Gallus gallus OX=9031 PE=4 SV=1	NaN	23.1668	5	22.319	0	63.215	122420000
A0A3Q2TS99	tr|A0A3Q2TS99|A0A3Q2TS99_CHICK Uncharacterized protein OS=Gallus gallus OX=9031 PE=4 SV=1	NaN	21.5771	1	8.8443	0.0049828	6.0137	15644000
A0A3Q2TSK1	tr|A0A3Q2TSK1|A0A3Q2TSK1_CHICK Mitochondrial import inner membrane translocase subunit TIM50 OS=Gallus gallus OX=9031 GN=TIMM50 PE=3 SV=1	NaN	23.0608	2	26.284	0	14.825	122490000
F1P179;A0A3Q2UKS1;A0A3Q2TSP8	tr|F1P179|F1P179_CHICK Glutamyl-tRNA synthetase OS=Gallus gallus OX=9031 GN=EPRS PE=3 SV=1;tr|A0A3Q2UKS1|A0A3Q2UKS1_CHICK Glutamyl-tRNA synthetase OS=Gallus gallus OX=9031 GN=EPRS PE=3 SV=1;tr|A0A3Q2TSP8|A0A3Q2TSP8_CHICK Glutamyl-tRNA synthetase OS=Gallus	NaN	18.4803	2	179.86	0	11.503	30719000
F1NDL4;A0A3Q2TSW8	tr|F1NDL4|F1NDL4_CHICK Uncharacterized protein OS=Gallus gallus OX=9031 GN=NID2 PE=4 SV=4;tr|A0A3Q2TSW8|A0A3Q2TSW8_CHICK Uncharacterized protein OS=Gallus gallus OX=9031 GN=NID2 PE=4 SV=1	19.3194	16.6303	4	120.57	0	29.899	32494000
A0A3Q2TSX5;A0A1L1RMH8	tr|A0A3Q2TSX5|A0A3Q2TSX5_CHICK Uncharacterized protein OS=Gallus gallus OX=9031 GN=LOC101749377 PE=4 SV=1;tr|A0A1L1RMH8|A0A1L1RMH8_CHICK Uncharacterized protein OS=Gallus gallus OX=9031 GN=LOC101749377 PE=4 SV=2	NaN	24.072	4	56.307	0	61.433	423260000
A0A3Q2TY92;A0A3Q2TT52;A0A3Q2UG57;E1C4G2	tr|A0A3Q2TY92|A0A3Q2TY92_CHICK Kinesin motor domain-containing protein OS=Gallus gallus OX=9031 GN=KIF26B PE=3 SV=1;tr|A0A3Q2TT52|A0A3Q2TT52_CHICK Kinesin motor domain-containing protein OS=Gallus gallus OX=9031 GN=KIF26B PE=3 SV=1;tr|A0A3Q2UG57|A0A3Q2UG57	NaN	20.4035	1	172.68	0.0095343	5.6733	105410000
A0A3Q2TTC9;A0A3Q2UE28;H9KYX1;A0A1D5PEX4;Q5ZJ58;F1P1P4;A0A060PJH4;A0A1D5PWJ0;F1ND21	tr|A0A3Q2TTC9|A0A3Q2TTC9_CHICK PIPK domain-containing protein OS=Gallus gallus OX=9031 GN=PIP5K1A PE=4 SV=1;tr|A0A3Q2UE28|A0A3Q2UE28_CHICK PIPK domain-containing protein OS=Gallus gallus OX=9031 GN=PIP5K1A PE=4 SV=1;tr|H9KYX1|H9KYX1_CHICK PIPK domain-conta	NaN	19.3235	2	58.585	0	26.813	15090000
A0A3Q2TTD8	tr|A0A3Q2TTD8|A0A3Q2TTD8_CHICK Uncharacterized protein OS=Gallus gallus OX=9031 GN=AKAP8L PE=3 SV=1	NaN	18.0007	1	80.041	0.0053558	5.9991	8393000
A0A3Q2TTG3;E1BW83;A0A3Q2UJU4	tr|A0A3Q2TTG3|A0A3Q2TTG3_CHICK Uncharacterized protein OS=Gallus gallus OX=9031 GN=SLC25A24 PE=3 SV=1;tr|E1BW83|E1BW83_CHICK Uncharacterized protein OS=Gallus gallus OX=9031 GN=SLC25A24 PE=3 SV=4;tr|A0A3Q2UJU4|A0A3Q2UJU4_CHICK Uncharacterized protein OS=Ga	NaN	19.9778	3	52.529	0	25.502	24783000
A0A3Q3AM84;A0A3Q2TTN3	tr|A0A3Q3AM84|A0A3Q3AM84_CHICK Non-specific serine/threonine protein kinase OS=Gallus gallus OX=9031 GN=MARK2 PE=3 SV=1;tr|A0A3Q2TTN3|A0A3Q2TTN3_CHICK Non-specific serine/threonine protein kinase OS=Gallus gallus OX=9031 GN=MARK2 PE=3 SV=1	NaN	19.4855	2	76.678	0	11.093	27894000
F1P5V4;A0A3Q2TTV8;A0A3Q2U1T0	tr|F1P5V4|F1P5V4_CHICK Uncharacterized protein OS=Gallus gallus OX=9031 GN=HELLS PE=4 SV=4;tr|A0A3Q2TTV8|A0A3Q2TTV8_CHICK Uncharacterized protein OS=Gallus gallus OX=9031 GN=HELLS PE=4 SV=1;tr|A0A3Q2U1T0|A0A3Q2U1T0_CHICK Uncharacterized protein OS=Gallus g	NaN	19.411	2	80.227	0	17.292	24399000
E1C6A9;A0A3Q2TU08	tr|E1C6A9|E1C6A9_CHICK Uncharacterized protein OS=Gallus gallus OX=9031 GN=CDC5L PE=3 SV=3;tr|A0A3Q2TU08|A0A3Q2TU08_CHICK Uncharacterized protein OS=Gallus gallus OX=9031 GN=CDC5L PE=3 SV=1	NaN	25.6613	6	101.54	0	82.276	2334900000
Q5ZI57;A0A3Q2TU20	sp|Q5ZI57|TPPC3_CHICK Trafficking protein particle complex subunit 3 OS=Gallus gallus OX=9031 GN=TRAPPC3 PE=2 SV=1;tr|A0A3Q2TU20|A0A3Q2TU20_CHICK Trafficking protein particle complex subunit OS=Gallus gallus OX=9031 GN=TRAPPC3 PE=3 SV=1	NaN	23.952	3	20.276	0	25.719	146050000
Q5ZJ38;A0A3Q2TU27	tr|Q5ZJ38|Q5ZJ38_CHICK RanBD1 domain-containing protein OS=Gallus gallus OX=9031 GN=RANBP1 PE=2 SV=1;tr|A0A3Q2TU27|A0A3Q2TU27_CHICK RanBD1 domain-containing protein OS=Gallus gallus OX=9031 GN=RANBP1 PE=4 SV=1	NaN	26.6577	5	24.171	0	70.821	847000000
A0A3Q2UEK7;A0A3Q2UIW7;A0A3Q2UEU7;A0A3Q2UD01;A0A3Q2TVF0;A0A3Q2TU31;A0A3Q2U2U0;A0A3Q2U922;A0A3Q3AXD5	tr|A0A3Q2UEK7|A0A3Q2UEK7_CHICK Uncharacterized protein OS=Gallus gallus OX=9031 PE=4 SV=1;tr|A0A3Q2UIW7|A0A3Q2UIW7_CHICK Uncharacterized protein OS=Gallus gallus OX=9031 PE=4 SV=1;tr|A0A3Q2UEU7|A0A3Q2UEU7_CHICK Uncharacterized protein OS=Gallus gallus OX=9	NaN	22.2571	5	57.033	0	36.093	120300000
A0A3Q2UHS1;F1NSB3;A0A3Q2TUF7	tr|A0A3Q2UHS1|A0A3Q2UHS1_CHICK Uncharacterized protein OS=Gallus gallus OX=9031 GN=JAM3 PE=4 SV=1;tr|F1NSB3|F1NSB3_CHICK Uncharacterized protein OS=Gallus gallus OX=9031 GN=JAM3 PE=4 SV=4;tr|A0A3Q2TUF7|A0A3Q2TUF7_CHICK Uncharacterized protein OS=Gallus gal	NaN	18.9854	2	33.204	0	24.314	9342100
A0A3Q2TUG0	tr|A0A3Q2TUG0|A0A3Q2TUG0_CHICK cwf21 domain-containing protein OS=Gallus gallus OX=9031 PE=4 SV=1	NaN	19.3929	1	27.643	0	12.926	7572300
A0A3Q2TUI6;A0A3Q2U0Q2;A0A3Q3A7N3;A0A3Q2TYH3;A0A3Q3AV99;A0A3Q2TWH8	tr|A0A3Q2TUI6|A0A3Q2TUI6_CHICK HMA domain-containing protein OS=Gallus gallus OX=9031 GN=RBP14L PE=4 SV=1;tr|A0A3Q2U0Q2|A0A3Q2U0Q2_CHICK HMA domain-containing protein OS=Gallus gallus OX=9031 GN=RBP14L PE=4 SV=1;tr|A0A3Q3A7N3|A0A3Q3A7N3_CHICK HMA domain-co	NaN	20.0787	1	28.121	0.00046062	8.6611	17719000
A0A3Q2TUK9;E1C0L6	tr|A0A3Q2TUK9|A0A3Q2TUK9_CHICK SRF-dependent transcription regulation-associated protein OS=Gallus gallus OX=9031 GN=SRFBP1 PE=4 SV=1;tr|E1C0L6|E1C0L6_CHICK SRF-dependent transcription regulation-associated protein OS=Gallus gallus OX=9031 GN=SRFBP1 PE=4 S	NaN	20.0562	1	46.23	0.00046992	9.4166	18534000
A0A3Q2TUP1;F1NBW2;Q90647	tr|A0A3Q2TUP1|A0A3Q2TUP1_CHICK H(+)-transporting two-sector ATPase OS=Gallus gallus OX=9031 GN=ATP6V1A PE=3 SV=1;tr|F1NBW2|F1NBW2_CHICK H(+)-transporting two-sector ATPase OS=Gallus gallus OX=9031 GN=ATP6V1A PE=3 SV=1;sp|Q90647|VATA_CHICK V-type proton ATP	21.3726	22.7779	7	68.298	0	112.58	326920000
A0A3Q2TUR0;F1NSL7	tr|A0A3Q2TUR0|A0A3Q2TUR0_CHICK Uncharacterized protein OS=Gallus gallus OX=9031 GN=TSTD1 PE=4 SV=1;tr|F1NSL7|F1NSL7_CHICK Uncharacterized protein OS=Gallus gallus OX=9031 GN=TSTD1 PE=4 SV=2	NaN	23.9326	6	36.828	0	151.92	336220000
A0A3Q2TUX3;E1C0F7	tr|A0A3Q2TUX3|A0A3Q2TUX3_CHICK Rho-GAP domain-containing protein OS=Gallus gallus OX=9031 GN=ARHGAP28 PE=4 SV=1;tr|E1C0F7|E1C0F7_CHICK Rho-GAP domain-containing protein OS=Gallus gallus OX=9031 GN=ARHGAP28 PE=4 SV=4	NaN	19.0231	1	31.037	0	12.383	8524200
A0A3Q2TV28	tr|A0A3Q2TV28|A0A3Q2TV28_CHICK Uncharacterized protein OS=Gallus gallus OX=9031 PE=4 SV=1	NaN	22.8743	1	7.5746	0.0023456	6.1754	30755000
A0A3Q2TV38;A0A3Q2TYY9	tr|A0A3Q2TV38|A0A3Q2TV38_CHICK Uncharacterized protein OS=Gallus gallus OX=9031 GN=FLNA PE=4 SV=1;tr|A0A3Q2TYY9|A0A3Q2TYY9_CHICK Uncharacterized protein OS=Gallus gallus OX=9031 GN=FLNA PE=4 SV=1	NaN	18.2462	1	43.293	0	18.023	6529600
F1ND14;Q5F3T7;A0A3Q2TV40;A0A3Q3AKI2;Q7T2T1;A0A1D5PN15;A0A1D5PEV1;A0A3Q2TY35	tr|F1ND14|F1ND14_CHICK CUGBP Elav-like family member 1 OS=Gallus gallus OX=9031 GN=CELF1 PE=3 SV=3;sp|Q5F3T7|CELF1_CHICK CUGBP Elav-like family member 1 OS=Gallus gallus OX=9031 GN=CELF1 PE=1 SV=2;tr|A0A3Q2TV40|A0A3Q2TV40_CHICK CUGBP Elav-like family membe	NaN	20.3524	2	51.668	0	13.863	21419000
A0A3Q2U7Y4;A0A3Q2TV78;A0A3Q2UHL9	tr|A0A3Q2U7Y4|A0A3Q2U7Y4_CHICK SUMO1 activating enzyme subunit 1 OS=Gallus gallus OX=9031 GN=SAE1 PE=3 SV=1;tr|A0A3Q2TV78|A0A3Q2TV78_CHICK ThiF domain-containing protein OS=Gallus gallus OX=9031 GN=SAE1 PE=3 SV=1;tr|A0A3Q2UHL9|A0A3Q2UHL9_CHICK ThiF domain-	NaN	24.2522	5	37.523	0	102.87	419620000
A0A3Q3AE75;A0A3Q2TVC5	tr|A0A3Q3AE75|A0A3Q3AE75_CHICK Uncharacterized protein OS=Gallus gallus OX=9031 GN=LOC107049176 PE=4 SV=1;tr|A0A3Q2TVC5|A0A3Q2TVC5_CHICK Uncharacterized protein OS=Gallus gallus OX=9031 GN=LOC101752020 PE=4 SV=1	NaN	22.4947	1	42.407	0.0023511	6.2016	100470000
Q5ZLS3;F1N9A6;A0A3Q2TVI7;A0A3Q3B0K2	sp|Q5ZLS3|BRE1A_CHICK E3 ubiquitin-protein ligase BRE1A OS=Gallus gallus OX=9031 GN=RNF20 PE=2 SV=1;tr|F1N9A6|F1N9A6_CHICK E3 ubiquitin protein ligase OS=Gallus gallus OX=9031 GN=RNF20 PE=3 SV=1;tr|A0A3Q2TVI7|A0A3Q2TVI7_CHICK E3 ubiquitin protein ligase OS	NaN	19.523	3	114.81	0	18.662	41435000
A0A3Q2UH84;F1P4U5;A0A3Q3AVL7;A0A3Q2TVJ5	tr|A0A3Q2UH84|A0A3Q2UH84_CHICK Thioredoxin-disulfide reductase OS=Gallus gallus OX=9031 GN=TXNRD2 PE=3 SV=1;tr|F1P4U5|F1P4U5_CHICK Thioredoxin-disulfide reductase OS=Gallus gallus OX=9031 GN=TXNRD2 PE=3 SV=5;tr|A0A3Q3AVL7|A0A3Q3AVL7_CHICK Thioredoxin-disul	NaN	19.7159	1	51.49	0	12.951	19807000
A0A3Q2TVM8;E1C1F8	tr|A0A3Q2TVM8|A0A3Q2TVM8_CHICK MUTSd domain-containing protein OS=Gallus gallus OX=9031 GN=MSH3 PE=4 SV=1;tr|E1C1F8|E1C1F8_CHICK DNA mismatch repair protein OS=Gallus gallus OX=9031 GN=MSH3 PE=3 SV=3	NaN	18.8557	1	96.61	0.006403	5.8674	25142000
F1NPL8;A0A3Q2TVV5	tr|F1NPL8|F1NPL8_CHICK Glycogen synthase kinase-3 beta OS=Gallus gallus OX=9031 GN=GSK3A PE=3 SV=4;tr|A0A3Q2TVV5|A0A3Q2TVV5_CHICK Glycogen synthase kinase-3 beta OS=Gallus gallus OX=9031 GN=GSK3A PE=3 SV=1	NaN	23.5439	5	44.71	0	231.91	256830000
A0A3Q2TVY3;A0A3Q2UAT9;A0A3Q3AXP4;F1NBS9;A0A3Q2TY82	tr|A0A3Q2TVY3|A0A3Q2TVY3_CHICK PKS_ER domain-containing protein OS=Gallus gallus OX=9031 GN=VAT1 PE=4 SV=1;tr|A0A3Q2UAT9|A0A3Q2UAT9_CHICK PKS_ER domain-containing protein OS=Gallus gallus OX=9031 GN=VAT1 PE=4 SV=1;tr|A0A3Q3AXP4|A0A3Q3AXP4_CHICK PKS_ER doma	NaN	25.8047	11	42.453	0	110.52	937780000
A0A3Q2TVZ0;F1NVX8	tr|A0A3Q2TVZ0|A0A3Q2TVZ0_CHICK Tubulin-folding cofactor E OS=Gallus gallus OX=9031 GN=TBCE PE=3 SV=1;tr|F1NVX8|F1NVX8_CHICK Tubulin-folding cofactor E OS=Gallus gallus OX=9031 GN=TBCE PE=3 SV=4	NaN	18.6898	2	54.392	0	14.384	12686000
A0A3Q2TW07;F1NJT3;F1NJT4;A0A1D5NU50;P11722	tr|A0A3Q2TW07|A0A3Q2TW07_CHICK Fibronectin OS=Gallus gallus OX=9031 GN=FN1 PE=4 SV=1;tr|F1NJT3|F1NJT3_CHICK Fibronectin OS=Gallus gallus OX=9031 GN=FN1 PE=4 SV=1;tr|F1NJT4|F1NJT4_CHICK Fibronectin OS=Gallus gallus OX=9031 GN=FN1 PE=4 SV=4;tr|A0A1D5NU50|A0A	24.7589	21.4383	27	263.51	0	323.31	3529300000
E1BUP8;A0A3Q2TW12	tr|E1BUP8|E1BUP8_CHICK PDZ domain-containing protein OS=Gallus gallus OX=9031 GN=AHNAK2 PE=4 SV=4;tr|A0A3Q2TW12|A0A3Q2TW12_CHICK PDZ domain-containing protein OS=Gallus gallus OX=9031 GN=AHNAK2 PE=4 SV=1	NaN	13.8937	2	428.86	0	19.83	3333300
A0A3Q2TW52	tr|A0A3Q2TW52|A0A3Q2TW52_CHICK Uncharacterized protein OS=Gallus gallus OX=9031 GN=COIL PE=4 SV=1	NaN	18.8052	1	32.21	0.0088333	5.693	7329300
A0A3Q2TWE8;E1C1C3;A0A3Q2U4S7;A0A3Q3AMA4;F1P199	tr|A0A3Q2TWE8|A0A3Q2TWE8_CHICK Uncharacterized protein OS=Gallus gallus OX=9031 GN=PPFIBP1 PE=3 SV=1;tr|E1C1C3|E1C1C3_CHICK Uncharacterized protein OS=Gallus gallus OX=9031 GN=PPFIBP1 PE=3 SV=3;tr|A0A3Q2U4S7|A0A3Q2U4S7_CHICK Uncharacterized protein OS=Gall	NaN	20.5899	5	107.38	0	44.557	77338000
A0A3Q2TWF2	tr|A0A3Q2TWF2|A0A3Q2TWF2_CHICK Late endosomal/lysosomal adaptor and MAPK and MTOR activator 1 OS=Gallus gallus OX=9031 GN=LAMTOR1 PE=3 SV=1	NaN	23.8454	5	17.687	0	43.028	135650000
A0A3Q2TWH1;A0A3Q2TX81;F1P0M2	tr|A0A3Q2TWH1|A0A3Q2TWH1_CHICK Uncharacterized protein OS=Gallus gallus OX=9031 GN=PCCA PE=4 SV=1;tr|A0A3Q2TX81|A0A3Q2TX81_CHICK Uncharacterized protein OS=Gallus gallus OX=9031 GN=PCCA PE=4 SV=1;tr|F1P0M2|F1P0M2_CHICK Propanoyl-CoA:carbon dioxide ligase s	NaN	22.8192	11	73.878	0	90.429	310830000
A0A3Q2TZ64;O73664;A0A3Q2TWL1;E1C5D8;A0A3Q2U0I8	tr|A0A3Q2TZ64|A0A3Q2TZ64_CHICK Uncharacterized protein OS=Gallus gallus OX=9031 GN=RBMS1 PE=4 SV=1;tr|O73664|O73664_CHICK MSSP-1 OS=Gallus gallus OX=9031 GN=RBMS1 PE=2 SV=1;tr|A0A3Q2TWL1|A0A3Q2TWL1_CHICK Uncharacterized protein OS=Gallus gallus OX=9031 GN=	NaN	22.4198	2	40.256	0	36.318	61719000
A0A3Q3APT7;A0A3Q2U4Z6;A0A3Q2TWL4;A0A3Q2U7Z0;F1NF84	tr|A0A3Q3APT7|A0A3Q3APT7_CHICK Uncharacterized protein OS=Gallus gallus OX=9031 GN=GOLGA2 PE=4 SV=1;tr|A0A3Q2U4Z6|A0A3Q2U4Z6_CHICK Uncharacterized protein OS=Gallus gallus OX=9031 GN=GOLGA2 PE=4 SV=1;tr|A0A3Q2TWL4|A0A3Q2TWL4_CHICK Uncharacterized protein O	NaN	17.6361	1	132.57	0.00046598	9.1339	12833000
A0A3Q2TWS9;F1NJ23;Q01635	tr|A0A3Q2TWS9|A0A3Q2TWS9_CHICK Laminin subunit beta-1 OS=Gallus gallus OX=9031 GN=LAMB1 PE=4 SV=1;tr|F1NJ23|F1NJ23_CHICK Laminin subunit beta-1 OS=Gallus gallus OX=9031 GN=LAMB1 PE=4 SV=4;sp|Q01635|LAMB1_CHICK Laminin subunit beta-1 (Fragment) OS=Gallus ga	NaN	20.0297	3	181.73	0	45.805	86705000
A0A3Q2TWU3;E1C3D8	tr|A0A3Q2TWU3|A0A3Q2TWU3_CHICK Phosphoinositide phospholipase C OS=Gallus gallus OX=9031 GN=PLCD1 PE=4 SV=1;tr|E1C3D8|E1C3D8_CHICK Phosphoinositide phospholipase C OS=Gallus gallus OX=9031 GN=PLCD1 PE=4 SV=5	NaN	16.0699	1	87.25	0.00085324	7.211	2338800
A0A3Q2TWV6;A0A3Q2UBL6;E1C8U8	tr|A0A3Q2TWV6|A0A3Q2TWV6_CHICK Uncharacterized protein OS=Gallus gallus OX=9031 GN=BRD3 PE=4 SV=1;tr|A0A3Q2UBL6|A0A3Q2UBL6_CHICK Uncharacterized protein OS=Gallus gallus OX=9031 GN=BRD3 PE=4 SV=1;tr|E1C8U8|E1C8U8_CHICK Uncharacterized protein OS=Gallus gal	NaN	23.1482	1	53.013	1	-2	213820000
A0A3Q2TX12;F1NFY2	tr|A0A3Q2TX12|A0A3Q2TX12_CHICK Glycerol-3-phosphate dehydrogenase [NAD(+)] OS=Gallus gallus OX=9031 GN=GPD1L2 PE=3 SV=1;tr|F1NFY2|F1NFY2_CHICK Glycerol-3-phosphate dehydrogenase [NAD(+)] OS=Gallus gallus OX=9031 GN=GPD1L2 PE=3 SV=3	NaN	23.2108	4	38.462	0	34.911	213580000
A0A3Q2TX98;A0A3Q2U2V2	tr|A0A3Q2TX98|A0A3Q2TX98_CHICK Uncharacterized protein OS=Gallus gallus OX=9031 GN=LOC107049913 PE=4 SV=1;tr|A0A3Q2U2V2|A0A3Q2U2V2_CHICK Uncharacterized protein OS=Gallus gallus OX=9031 GN=LOC107049913 PE=4 SV=1	NaN	18.8199	2	29.001	0	19.409	7404200
E1BX68;A0A3Q2TXF1	tr|E1BX68|E1BX68_CHICK Arf-GAP domain-containing protein OS=Gallus gallus OX=9031 GN=SMAP1 PE=4 SV=3;tr|A0A3Q2TXF1|A0A3Q2TXF1_CHICK Arf-GAP domain-containing protein OS=Gallus gallus OX=9031 GN=SMAP1 PE=4 SV=1	NaN	21.3816	1	48.258	0.00083542	6.9025	27322000
E1C6R4;A0A3Q2TXF9;A0A3Q3A2N8	tr|E1C6R4|E1C6R4_CHICK Peptidylprolyl isomerase OS=Gallus gallus OX=9031 GN=FKBP8 PE=4 SV=2;tr|A0A3Q2TXF9|A0A3Q2TXF9_CHICK Peptidylprolyl isomerase OS=Gallus gallus OX=9031 GN=FKBP8 PE=4 SV=1;tr|A0A3Q3A2N8|A0A3Q3A2N8_CHICK Peptidylprolyl isomerase OS=Gallu	NaN	21.8115	4	44.326	0	27.43	73609000
A0A3Q2TXG9;F1NE88	tr|A0A3Q2TXG9|A0A3Q2TXG9_CHICK Ubiquitin carboxyl-terminal hydrolase OS=Gallus gallus OX=9031 GN=USP4 PE=3 SV=1;tr|F1NE88|F1NE88_CHICK Ubiquitin carboxyl-terminal hydrolase OS=Gallus gallus OX=9031 GN=USP4 PE=3 SV=1	NaN	19.3124	1	101.29	0	36.076	27995000
A0A3Q2TXI9;F1NAG9	tr|A0A3Q2TXI9|A0A3Q2TXI9_CHICK Protein kinase domain-containing protein OS=Gallus gallus OX=9031 GN=NEK9 PE=3 SV=1;tr|F1NAG9|F1NAG9_CHICK Protein kinase domain-containing protein OS=Gallus gallus OX=9031 GN=NEK9 PE=3 SV=4	NaN	20.5616	2	113.02	0	25.398	77380000
A0A3Q2TXL9	tr|A0A3Q2TXL9|A0A3Q2TXL9_CHICK Uncharacterized protein OS=Gallus gallus OX=9031 GN=STIP1 PE=4 SV=1	NaN	25.3512	13	62.058	0	198.61	1455300000
F1ND15;A0A3Q2TXP1	tr|F1ND15|F1ND15_CHICK J domain-containing protein OS=Gallus gallus OX=9031 GN=DNAJC8 PE=4 SV=3;tr|A0A3Q2TXP1|A0A3Q2TXP1_CHICK J domain-containing protein OS=Gallus gallus OX=9031 GN=DNAJC8 PE=4 SV=1	NaN	22.7602	3	29.614	0	30.542	99458000
A0A3Q2TY77	tr|A0A3Q2TY77|A0A3Q2TY77_CHICK Uncharacterized protein OS=Gallus gallus OX=9031 GN=RAB15 PE=4 SV=1	NaN	24.4026	1	24.177	0.000456	8.2312	266130000
A0A3Q2TY88;F1NU19	tr|A0A3Q2TY88|A0A3Q2TY88_CHICK WD_REPEATS_REGION domain-containing protein OS=Gallus gallus OX=9031 PE=4 SV=1;tr|F1NU19|F1NU19_CHICK WD_REPEATS_REGION domain-containing protein OS=Gallus gallus OX=9031 PE=4 SV=4	NaN	23.1101	1	21.838	0.007079	5.7905	72430000
E1C6G9;A0A3Q2TYD7;A0A3Q2UHS2	tr|E1C6G9|E1C6G9_CHICK Uncharacterized protein OS=Gallus gallus OX=9031 GN=NCKAP1 PE=4 SV=3;tr|A0A3Q2TYD7|A0A3Q2TYD7_CHICK Uncharacterized protein OS=Gallus gallus OX=9031 GN=NCKAP1 PE=4 SV=1;tr|A0A3Q2UHS2|A0A3Q2UHS2_CHICK Uncharacterized protein OS=Gallus	NaN	20.4749	4	128.74	0	28.202	88898000
Q5ZKY6;A0A3Q2UDV9;A0A3Q2TYE4;A0A3Q2UB54	tr|Q5ZKY6|Q5ZKY6_CHICK Uncharacterized protein OS=Gallus gallus OX=9031 GN=TMEM65 PE=2 SV=1;tr|A0A3Q2UDV9|A0A3Q2UDV9_CHICK Uncharacterized protein OS=Gallus gallus OX=9031 GN=TMEM65 PE=4 SV=1;tr|A0A3Q2TYE4|A0A3Q2TYE4_CHICK Uncharacterized protein OS=Gallus	NaN	18.6764	1	18.88	0.0067416	5.8259	3351600
A0A3Q2TYK7;P53488;A0A3Q3A3B6;F1NRM5	tr|A0A3Q2TYK7|A0A3Q2TYK7_CHICK Actin-related protein 2 OS=Gallus gallus OX=9031 GN=ACTR2 PE=3 SV=1;sp|P53488|ARP2_CHICK Actin-related protein 2 OS=Gallus gallus OX=9031 GN=ACTR2 PE=2 SV=1;tr|A0A3Q3A3B6|A0A3Q3A3B6_CHICK Actin-related protein 2 OS=Gallus gal	NaN	24.835	7	43.186	0	57.016	359150000
A0A3Q2TYL2;A0A3Q2UBD2;A0A3Q2U3S1;Q5ZLK5;F1P1W4	tr|A0A3Q2TYL2|A0A3Q2TYL2_CHICK Prolyl 4-hydroxylase subunit alpha-2 OS=Gallus gallus OX=9031 GN=P4HA2 PE=4 SV=1;tr|A0A3Q2UBD2|A0A3Q2UBD2_CHICK Procollagen-proline 4-dioxygenase OS=Gallus gallus OX=9031 GN=P4HA2 PE=3 SV=1;tr|A0A3Q2U3S1|A0A3Q2U3S1_CHICK Proc	NaN	23.6683	7	57.439	0	67.062	319960000
A0A3Q2UBP2;A0A3Q2U9S9;A0A3Q2UG16;A0A3Q2TYQ7;Q2VB19	tr|A0A3Q2UBP2|A0A3Q2UBP2_CHICK Pumilio homolog 1 OS=Gallus gallus OX=9031 GN=PUM1 PE=4 SV=1;tr|A0A3Q2U9S9|A0A3Q2U9S9_CHICK Pumilio homolog 1 OS=Gallus gallus OX=9031 GN=PUM1 PE=4 SV=1;tr|A0A3Q2UG16|A0A3Q2UG16_CHICK Pumilio homolog 1 OS=Gallus gallus OX=903	NaN	20.7094	3	117.2	0	19.338	68583000
A0A3Q2TYT9;A0A3Q2UB81	tr|A0A3Q2TYT9|A0A3Q2TYT9_CHICK Ribonuclease OS=Gallus gallus OX=9031 GN=LOC107050018 PE=3 SV=1;tr|A0A3Q2UB81|A0A3Q2UB81_CHICK Ribonuclease OS=Gallus gallus OX=9031 GN=LOC107050018 PE=3 SV=1	NaN	18.8127	3	44.77	0	22.275	9669500
Q5F3G7;A0A3Q2TYY0	sp|Q5F3G7|C1GLT_CHICK Glycoprotein-N-acetylgalactosamine 3-beta-galactosyltransferase 1 OS=Gallus gallus OX=9031 GN=C1GALT1 PE=2 SV=1;tr|A0A3Q2TYY0|A0A3Q2TYY0_CHICK Glycoprotein-N-acetylgalactosamine 3-beta-galactosyltransferase 1 OS=Gallus gallus OX=9031	NaN	20.3953	1	42.62	0	27.849	20687000
A0A3Q2U787;A0A3Q2UDA0;A0A3Q2TYZ8	tr|A0A3Q2U787|A0A3Q2U787_CHICK Reticulon OS=Gallus gallus OX=9031 GN=RTN3 PE=4 SV=1;tr|A0A3Q2UDA0|A0A3Q2UDA0_CHICK Reticulon OS=Gallus gallus OX=9031 GN=RTN3 PE=4 SV=1;tr|A0A3Q2TYZ8|A0A3Q2TYZ8_CHICK Reticulon OS=Gallus gallus OX=9031 GN=RTN3 PE=4 SV=1	NaN	24.8188	2	25.988	0	21.031	177560000
F1NWK4;A0A3Q2TZA5	tr|F1NWK4|F1NWK4_CHICK Ribosomal RNA-processing protein 40 OS=Gallus gallus OX=9031 GN=EXOSC3 PE=3 SV=2;tr|A0A3Q2TZA5|A0A3Q2TZA5_CHICK Ribosomal RNA-processing protein 40 OS=Gallus gallus OX=9031 GN=EXOSC3 PE=3 SV=1	NaN	21.2684	1	27.797	0.00044623	7.8131	35364000
A0A3Q2TZD8;F1N9B7	tr|A0A3Q2TZD8|A0A3Q2TZD8_CHICK UV excision repair protein RAD23 OS=Gallus gallus OX=9031 GN=RAD23B PE=3 SV=1;tr|F1N9B7|F1N9B7_CHICK Uncharacterized protein OS=Gallus gallus OX=9031 GN=RAD23B PE=3 SV=4	NaN	20.7767	1	40.975	0.0023828	6.3152	19760000
A0A3Q2TZS5;F1N998	tr|A0A3Q2TZS5|A0A3Q2TZS5_CHICK Formin-binding protein 1-like OS=Gallus gallus OX=9031 GN=FNBP1L PE=3 SV=1;tr|F1N998|F1N998_CHICK Formin-binding protein 1-like OS=Gallus gallus OX=9031 GN=FNBP1L PE=3 SV=4	NaN	20.815	3	63.789	0	24.413	55341000
A0A3Q2TZT0	tr|A0A3Q2TZT0|A0A3Q2TZT0_CHICK Inositol-3-phosphate synthase OS=Gallus gallus OX=9031 GN=ISYNA1 PE=3 SV=1	NaN	17.6786	1	60.599	0.00082576	6.7855	5454600
A0A3Q2TZW6	tr|A0A3Q2TZW6|A0A3Q2TZW6_CHICK Uncharacterized protein OS=Gallus gallus OX=9031 GN=TMEM115 PE=4 SV=1	NaN	20.6871	1	37.844	0	32.934	16883000
A0A3Q2U067	tr|A0A3Q2U067|A0A3Q2U067_CHICK Uncharacterized protein OS=Gallus gallus OX=9031 GN=SFXN4 PE=3 SV=1	NaN	20.9533	2	45.389	0	14.585	48729000
A0A3Q2U068;F1NSP8	tr|A0A3Q2U068|A0A3Q2U068_CHICK Uncharacterized protein OS=Gallus gallus OX=9031 GN=HNRNPU PE=4 SV=1;tr|F1NSP8|F1NSP8_CHICK Uncharacterized protein OS=Gallus gallus OX=9031 GN=HNRNPU PE=4 SV=4	NaN	27.0317	23	85.564	0	323.31	4527700000
R4GHW9;A0A3Q2UBU1;A0A3Q2UIF9;A0A3Q2U706;A0A3Q2U333;A0A3Q2UDA7;A0A3Q2U802;A0A3Q2U080;A0A3Q3AUY0;A0A3Q2U418	tr|R4GHW9|R4GHW9_CHICK Band 4.1 OS=Gallus gallus OX=9031 GN=EPB41 PE=4 SV=2;tr|A0A3Q2UBU1|A0A3Q2UBU1_CHICK Band 4.1 OS=Gallus gallus OX=9031 GN=EPB41 PE=4 SV=1;tr|A0A3Q2UIF9|A0A3Q2UIF9_CHICK Band 4.1 OS=Gallus gallus OX=9031 GN=EPB41 PE=4 SV=1;tr|A0A3Q2U70	NaN	20.5951	3	120.19	0	25.143	96624000
A0A3Q2U098	tr|A0A3Q2U098|A0A3Q2U098_CHICK UBC core domain-containing protein OS=Gallus gallus OX=9031 GN=UBE2S PE=3 SV=1	NaN	21.8398	1	28.704	0	12.43	41290000
Q5F368;F1NSS8;A0A3Q2U0F5	sp|Q5F368|P33MX_CHICK Putative monooxygenase p33MONOX OS=Gallus gallus OX=9031 GN=P33MONOX PE=2 SV=1;tr|F1NSS8|F1NSS8_CHICK Putative monooxygenase p33MONOX OS=Gallus gallus OX=9031 GN=KIAA1191 PE=3 SV=1;tr|A0A3Q2U0F5|A0A3Q2U0F5_CHICK Putative monooxygenase	NaN	17.4854	1	31.526	0.0057121	5.9554	3670100
R4GHQ0;A0A3Q2U0H7;A0A3Q3ASD7	tr|R4GHQ0|R4GHQ0_CHICK Septin-type G domain-containing protein OS=Gallus gallus OX=9031 GN=SEPT12 PE=3 SV=3;tr|A0A3Q2U0H7|A0A3Q2U0H7_CHICK Septin-type G domain-containing protein OS=Gallus gallus OX=9031 GN=SEPT12 PE=3 SV=1;tr|A0A3Q3ASD7|A0A3Q3ASD7_CHICK S	NaN	20.1067	1	39.949	0.0081451	5.7382	23712000
A0A3Q2U0J0;A0A3Q2UHP1	tr|A0A3Q2U0J0|A0A3Q2U0J0_CHICK RRM domain-containing protein OS=Gallus gallus OX=9031 GN=MSI1 PE=3 SV=1;tr|A0A3Q2UHP1|A0A3Q2UHP1_CHICK Uncharacterized protein OS=Gallus gallus OX=9031 GN=MSI1 PE=3 SV=1	NaN	18.9701	1	40.693	0.00046882	9.356	8216500
A0A3Q2U0N4;A0A3Q3ARD4;A0A3Q2TX22;A0A3Q2ULL1;A0A3Q2U4V6;A0A3Q2U5M8;A0A3Q2UHW8;A0A3Q2UDA5;A0A3Q2UPH3;A0A3Q2UD70;A0A3Q2TTN1;A0A3Q2U9E1;A0A3Q2U3K4;A0A3Q2U637;A0A3Q2U287;A0A3Q2U8F2;A0A3Q2U7A2;A0A3Q2TX54;A0A3Q2TXQ0;A0A3Q3AKX3;A0A3Q2TUE3;A0A3Q2TTU9;A0A3Q2TT43;A0A3Q2U291;A0A3Q2TYH6;A0A3Q2U343	tr|A0A3Q2U0N4|A0A3Q2U0N4_CHICK Ig-like domain-containing protein OS=Gallus gallus OX=9031 PE=4 SV=1;tr|A0A3Q3ARD4|A0A3Q3ARD4_CHICK Ig-like domain-containing protein OS=Gallus gallus OX=9031 PE=4 SV=1;tr|A0A3Q2TX22|A0A3Q2TX22_CHICK Ig-like domain-containing	NaN	22.2267	1	10.534	0	14.527	34356000
A0A3Q2U8R2;A0A3Q2U0Q5;R9PXQ2;R4GFM0;F1P065	tr|A0A3Q2U8R2|A0A3Q2U8R2_CHICK FERM, ARHGEF and pleckstrin domain-containing protein 1 OS=Gallus gallus OX=9031 GN=FARP1 PE=4 SV=1;tr|A0A3Q2U0Q5|A0A3Q2U0Q5_CHICK FERM, ARHGEF and pleckstrin domain-containing protein 1 OS=Gallus gallus OX=9031 GN=FARP1 PE=4	NaN	19.953	3	115.77	0	28.723	51763000
A0A3Q2U0S7;Q5F491	tr|A0A3Q2U0S7|A0A3Q2U0S7_CHICK RNA helicase OS=Gallus gallus OX=9031 GN=DDX3X PE=3 SV=1;tr|Q5F491|Q5F491_CHICK RNA helicase OS=Gallus gallus OX=9031 GN=DDX3X PE=2 SV=1	NaN	24.7605	12	70.556	0	189.31	1080000000
F1NKZ7;A0A3Q2U145;A0A3Q3AIB1	tr|F1NKZ7|F1NKZ7_CHICK Fe2OG dioxygenase domain-containing protein OS=Gallus gallus OX=9031 GN=OGFOD3 PE=4 SV=4;tr|A0A3Q2U145|A0A3Q2U145_CHICK Fe2OG dioxygenase domain-containing protein OS=Gallus gallus OX=9031 GN=OGFOD3 PE=4 SV=1;tr|A0A3Q3AIB1|A0A3Q3AIB1	NaN	21.4264	2	34.252	0	12.316	53547000
A0A3Q2U150;A0A3Q3AER1	tr|A0A3Q2U150|A0A3Q2U150_CHICK Uncharacterized protein OS=Gallus gallus OX=9031 PE=4 SV=1;tr|A0A3Q3AER1|A0A3Q3AER1_CHICK Uncharacterized protein OS=Gallus gallus OX=9031 PE=4 SV=1	NaN	21.2105	4	146.84	0	30.127	111630000
A0A3Q2U1G0;F1NLE4	tr|A0A3Q2U1G0|A0A3Q2U1G0_CHICK Glutathione synthetase OS=Gallus gallus OX=9031 GN=GSS PE=3 SV=1;tr|F1NLE4|F1NLE4_CHICK Glutathione synthetase OS=Gallus gallus OX=9031 GN=GSS PE=3 SV=2	NaN	19.9398	1	51.549	0.00085106	7.1699	28160000
A0A3Q2U1I1;F1NQZ5;E1C4K8;A0A3Q3AGL8;A0A3Q3AL21	tr|A0A3Q2U1I1|A0A3Q2U1I1_CHICK CTP_transf_like domain-containing protein OS=Gallus gallus OX=9031 GN=PCYT1B PE=3 SV=1;tr|F1NQZ5|F1NQZ5_CHICK CTP_transf_like domain-containing protein OS=Gallus gallus OX=9031 GN=PCYT1B PE=3 SV=4;tr|E1C4K8|E1C4K8_CHICK CTP_t	NaN	18.3234	2	41.461	0	13.706	7544100
A0A3S5ZP62;A0A3Q2U1L1	tr|A0A3S5ZP62|A0A3S5ZP62_CHICK Uncharacterized protein OS=Gallus gallus OX=9031 GN=ZMYM2 PE=4 SV=1;tr|A0A3Q2U1L1|A0A3Q2U1L1_CHICK Uncharacterized protein OS=Gallus gallus OX=9031 GN=ZMYM2 PE=4 SV=1	NaN	16.9853	1	45.972	0.0016149	6.492	2075900
A0A3Q2UD21;F1N9R8;A0A3Q2U1N1	tr|A0A3Q2UD21|A0A3Q2UD21_CHICK Uncharacterized protein OS=Gallus gallus OX=9031 GN=NUCKS1 PE=4 SV=1;tr|F1N9R8|F1N9R8_CHICK Uncharacterized protein OS=Gallus gallus OX=9031 GN=NUCKS1 PE=4 SV=4;tr|A0A3Q2U1N1|A0A3Q2U1N1_CHICK Uncharacterized protein OS=Gallus	NaN	21.2033	1	32.625	0.0081331	5.7288	24145000
A0A3Q2U1U6	tr|A0A3Q2U1U6|A0A3Q2U1U6_CHICK RRM domain-containing protein OS=Gallus gallus OX=9031 PE=4 SV=1	NaN	23.3723	3	51.854	0	25.209	162870000
A0A3Q2U1Z0;A0A3Q2UF52;A0A3Q3A9R4	tr|A0A3Q2U1Z0|A0A3Q2U1Z0_CHICK Ribosome biogenesis protein BOP1 OS=Gallus gallus OX=9031 GN=BOP1 PE=3 SV=1;tr|A0A3Q2UF52|A0A3Q2UF52_CHICK Ribosome biogenesis protein BOP1 OS=Gallus gallus OX=9031 GN=BOP1 PE=3 SV=1;tr|A0A3Q3A9R4|A0A3Q3A9R4_CHICK Ribosome bi	NaN	20.8717	3	81.255	0	28.668	59478000
A0A3Q3B012;A0A3Q2U216	tr|A0A3Q3B012|A0A3Q3B012_CHICK Leucine zipper transcription factor-like protein 1 OS=Gallus gallus OX=9031 GN=LZTFL1 PE=3 SV=1;tr|A0A3Q2U216|A0A3Q2U216_CHICK Leucine zipper transcription factor-like protein 1 OS=Gallus gallus OX=9031 GN=LZTFL1 PE=3 SV=1	NaN	20.4181	1	32.342	0.0091777	5.6802	21017000
A0A3Q2U281;Q5ZMG1;F1NCY5	tr|A0A3Q2U281|A0A3Q2U281_CHICK E3 UFM1-protein ligase 1 OS=Gallus gallus OX=9031 GN=UFL1 PE=3 SV=1;sp|Q5ZMG1|UFL1_CHICK E3 UFM1-protein ligase 1 OS=Gallus gallus OX=9031 GN=UFL1 PE=2 SV=1;tr|F1NCY5|F1NCY5_CHICK E3 UFM1-protein ligase 1 OS=Gallus gallus OX=	NaN	21.1603	3	82.318	0	36.328	93743000
A0A3Q2U374;A0A3Q2U289	tr|A0A3Q2U374|A0A3Q2U374_CHICK EF-hand domain-containing protein OS=Gallus gallus OX=9031 GN=LOC107050604 PE=4 SV=1;tr|A0A3Q2U289|A0A3Q2U289_CHICK EF-hand domain-containing protein OS=Gallus gallus OX=9031 GN=LOC107050604 PE=4 SV=1	NaN	22.9731	2	39.914	0	67.924	90569000
A0A3Q2U295;A0A3Q3ATF2	tr|A0A3Q2U295|A0A3Q2U295_CHICK Uncharacterized protein OS=Gallus gallus OX=9031 GN=C19orf43 PE=4 SV=1;tr|A0A3Q3ATF2|A0A3Q3ATF2_CHICK Uncharacterized protein OS=Gallus gallus OX=9031 GN=C19orf43 PE=4 SV=1	NaN	22.312	1	15.798	0.00044504	7.7652	31242000
A0A3Q2U2C6	tr|A0A3Q2U2C6|A0A3Q2U2C6_CHICK CLPTM1 regulator of GABA type A receptor forward trafficking OS=Gallus gallus OX=9031 PE=3 SV=1	NaN	21.6878	1	31.088	0.0012275	6.6757	40538000
A0A3Q2U3I1;A0A3Q3B230;A0A3Q2U2K2;A0A3Q2UI02;A0A1D5P094	tr|A0A3Q2U3I1|A0A3Q2U3I1_CHICK ENTH domain-containing protein OS=Gallus gallus OX=9031 GN=EPN2 PE=3 SV=1;tr|A0A3Q3B230|A0A3Q3B230_CHICK ENTH domain-containing protein OS=Gallus gallus OX=9031 GN=EPN2 PE=3 SV=1;tr|A0A3Q2U2K2|A0A3Q2U2K2_CHICK ENTH domain-con	NaN	22.0799	5	52.482	0	140.6	97528000
A0A3Q2U2Y6	tr|A0A3Q2U2Y6|A0A3Q2U2Y6_CHICK Succinate dehydrogenase cytochrome b560 subunit, mitochondrial OS=Gallus gallus OX=9031 GN=SDHC PE=1 SV=1	NaN	21.9211	2	15.361	0	13.895	23826000
A0A3Q2U312;F6R228	tr|A0A3Q2U312|A0A3Q2U312_CHICK Uncharacterized protein OS=Gallus gallus OX=9031 GN=IBA57 PE=4 SV=1;tr|F6R228|F6R228_CHICK Uncharacterized protein OS=Gallus gallus OX=9031 GN=IBA57 PE=4 SV=1	NaN	20.4738	3	27.337	0	20.294	18931000
A0A3Q2U335	tr|A0A3Q2U335|A0A3Q2U335_CHICK ADF-H domain-containing protein OS=Gallus gallus OX=9031 PE=4 SV=1	NaN	21.1715	2	13.208	0	26.639	21257000
A0A3Q2U347	tr|A0A3Q2U347|A0A3Q2U347_CHICK Phosvitin OS=Gallus gallus OX=9031 GN=VTG3 PE=4 SV=1	17.3493	26.0642	41	187	0	323.31	6400200000
A0A3Q2U3I3;E1BVH6	tr|A0A3Q2U3I3|A0A3Q2U3I3_CHICK Translation machinery-associated protein 16 OS=Gallus gallus OX=9031 GN=TMA16 PE=3 SV=1;tr|E1BVH6|E1BVH6_CHICK Translation machinery-associated protein 16 OS=Gallus gallus OX=9031 GN=TMA16 PE=3 SV=1	NaN	19.9243	1	21.261	0.00045662	8.2898	7959900
A0A3Q2U3J4	tr|A0A3Q2U3J4|A0A3Q2U3J4_CHICK Uncharacterized protein OS=Gallus gallus OX=9031 PE=4 SV=1	NaN	18.641	1	38.787	0.00082237	6.7122	6949400
A0A3Q3AEI2;A0A3Q2U5J9;A0A3Q2U3J7	tr|A0A3Q3AEI2|A0A3Q3AEI2_CHICK Capsid protein p27, alternate cleaved 1 OS=Gallus gallus OX=9031 GN=LOC107053122 PE=4 SV=1;tr|A0A3Q2U5J9|A0A3Q2U5J9_CHICK Capsid protein p27, alternate cleaved 1 OS=Gallus gallus OX=9031 PE=4 SV=1;tr|A0A3Q2U3J7|A0A3Q2U3J7_CHI	NaN	22.0815	1	65.817	0	49.672	124270000
A0A3Q2U3Q5	tr|A0A3Q2U3Q5|A0A3Q2U3Q5_CHICK Methionine adenosyltransferase OS=Gallus gallus OX=9031 GN=MAT2A PE=3 SV=1	NaN	25.8337	4	20.501	0	103.63	538210000
A0A3Q2U3R6;E1BT08	tr|A0A3Q2U3R6|A0A3Q2U3R6_CHICK Uncharacterized protein OS=Gallus gallus OX=9031 GN=HSPH1 PE=3 SV=1;tr|E1BT08|E1BT08_CHICK Heat shock 110 kDa protein OS=Gallus gallus OX=9031 GN=HSPH1 PE=3 SV=4	NaN	20.6639	5	94.351	0	37.201	74756000
A0A3Q2U3S6	tr|A0A3Q2U3S6|A0A3Q2U3S6_CHICK Protoporphyrinogen oxidase OS=Gallus gallus OX=9031 PE=4 SV=1	NaN	20.5835	1	55.664	0.0070896	5.7959	36139000
A0A3Q2U3U3;Q5ZME1;A0A3Q2U0R8;F6T6F1;A0A1D5PVH5	tr|A0A3Q2U3U3|A0A3Q2U3U3_CHICK Uncharacterized protein OS=Gallus gallus OX=9031 GN=HNRNPA2B1 PE=4 SV=1;tr|Q5ZME1|Q5ZME1_CHICK Uncharacterized protein OS=Gallus gallus OX=9031 GN=HNRNPA2B1 PE=2 SV=1;tr|A0A3Q2U0R8|A0A3Q2U0R8_CHICK Uncharacterized protein OS=	NaN	27.3413	8	36.259	0	192.92	3230800000
Q8QGH2;A0A3Q2U3Y0	sp|Q8QGH2|SUMO1_CHICK Small ubiquitin-related modifier 1 OS=Gallus gallus OX=9031 GN=SUMO1 PE=3 SV=1;tr|A0A3Q2U3Y0|A0A3Q2U3Y0_CHICK Small ubiquitin-related modifier 1 OS=Gallus gallus OX=9031 GN=SUMO1 PE=4 SV=1	NaN	24.4918	2	11.557	0	11.131	165140000
F1NY62;A0A3Q2U403	tr|F1NY62|F1NY62_CHICK Uncharacterized protein OS=Gallus gallus OX=9031 GN=PGAM5 PE=4 SV=4;tr|A0A3Q2U403|A0A3Q2U403_CHICK Uncharacterized protein OS=Gallus gallus OX=9031 GN=PGAM5 PE=4 SV=1	NaN	21.6428	1	15.952	1	-2	26194000
A0A3Q2U456;A0A3Q2UDK6	tr|A0A3Q2U456|A0A3Q2U456_CHICK Uncharacterized protein OS=Gallus gallus OX=9031 GN=PNKP PE=4 SV=1;tr|A0A3Q2UDK6|A0A3Q2UDK6_CHICK Uncharacterized protein OS=Gallus gallus OX=9031 GN=PNKP PE=4 SV=1	NaN	18.1468	1	20.802	0.00084674	7.1029	3192400
A0A3Q2U489	tr|A0A3Q2U489|A0A3Q2U489_CHICK Sas10 domain-containing protein OS=Gallus gallus OX=9031 GN=UTP3 PE=3 SV=1	NaN	20.5458	2	61.97	0	76.31	26022000
A0A3Q2U4A5	tr|A0A3Q2U4A5|A0A3Q2U4A5_CHICK HAUS-augmin3 domain-containing protein OS=Gallus gallus OX=9031 GN=HAUS3 PE=3 SV=1	NaN	18.0238	1	68.916	0.0024058	6.4137	9061100
E1C6D1;A0A3Q2U4G6;A0A3Q2ULM6;A0A3Q2UFA0;A0A3Q2UL60	tr|E1C6D1|E1C6D1_CHICK Microtubule-associated protein OS=Gallus gallus OX=9031 GN=MAP2 PE=4 SV=4;tr|A0A3Q2U4G6|A0A3Q2U4G6_CHICK Microtubule-associated protein OS=Gallus gallus OX=9031 GN=MAP2 PE=4 SV=1;tr|A0A3Q2ULM6|A0A3Q2ULM6_CHICK Microtubule-associated	NaN	19.5903	1	53.318	0.0024106	6.4344	17366000
A0A3Q2U4H1	tr|A0A3Q2U4H1|A0A3Q2U4H1_CHICK Uncharacterized protein OS=Gallus gallus OX=9031 GN=ESYT1 PE=3 SV=1	NaN	20.7445	5	114.18	0	62.559	87838000
F1N804;A0A3Q2U4H8	tr|F1N804|F1N804_CHICK Sema domain-containing protein OS=Gallus gallus OX=9031 GN=PLXNA1 PE=3 SV=2;tr|A0A3Q2U4H8|A0A3Q2U4H8_CHICK Sema domain-containing protein OS=Gallus gallus OX=9031 GN=PLXNA1 PE=3 SV=1	23.4621	24.0778	1	213.13	0.0024019	6.4016	2750700000
A0A3Q2U4J3;A0A1D5NYA7	tr|A0A3Q2U4J3|A0A3Q2U4J3_CHICK Sema domain-containing protein OS=Gallus gallus OX=9031 GN=PLXNB2 PE=3 SV=1;tr|A0A1D5NYA7|A0A1D5NYA7_CHICK Sema domain-containing protein OS=Gallus gallus OX=9031 GN=PLXNB2 PE=3 SV=2	NaN	16.6554	2	202.21	0	12.673	9805800
Q90988;E1C612;A0A3Q2U4L6	sp|Q90988|SMC2_CHICK Structural maintenance of chromosomes protein 2 OS=Gallus gallus OX=9031 GN=SMC2 PE=2 SV=1;tr|E1C612|E1C612_CHICK Structural maintenance of chromosomes protein OS=Gallus gallus OX=9031 GN=SMC2 PE=3 SV=2;tr|A0A3Q2U4L6|A0A3Q2U4L6_CHICK S	NaN	21.469	8	134.94	0	57.353	179970000
A0A3Q3AF25;A0A3Q2UDM7;E1BSF5;A0A3Q2U4M1	tr|A0A3Q3AF25|A0A3Q3AF25_CHICK Branched-chain-amino-acid aminotransferase OS=Gallus gallus OX=9031 GN=BCAT1 PE=3 SV=1;tr|A0A3Q2UDM7|A0A3Q2UDM7_CHICK Branched-chain-amino-acid aminotransferase OS=Gallus gallus OX=9031 GN=BCAT1 PE=3 SV=1;tr|E1BSF5|E1BSF5_CHI	NaN	20.4713	2	41.727	0	11.391	21805000
A0A3Q2U4M6;F1NHD9	tr|A0A3Q2U4M6|A0A3Q2U4M6_CHICK Exocyst complex component 3 OS=Gallus gallus OX=9031 GN=EXOC3 PE=3 SV=1;tr|F1NHD9|F1NHD9_CHICK Exocyst complex component 3 OS=Gallus gallus OX=9031 GN=EXOC3 PE=3 SV=2	NaN	26.6686	1	79.228	0.0070816	5.7906	3626700000
A0A3Q3A8P5;A0A3Q2U7S1;A0A3Q2U4N9	tr|A0A3Q3A8P5|A0A3Q3A8P5_CHICK Uncharacterized protein OS=Gallus gallus OX=9031 GN=LOC425607 PE=3 SV=1;tr|A0A3Q2U7S1|A0A3Q2U7S1_CHICK Uncharacterized protein OS=Gallus gallus OX=9031 GN=LOC425607 PE=3 SV=1;tr|A0A3Q2U4N9|A0A3Q2U4N9_CHICK Uncharacterized pro	NaN	19.9675	2	65.456	0	54.508	31782000
A0A3Q2U4P4;E1C8W4	tr|A0A3Q2U4P4|A0A3Q2U4P4_CHICK Ubiquitin carboxyl-terminal hydrolase OS=Gallus gallus OX=9031 GN=USP5 PE=3 SV=1;tr|E1C8W4|E1C8W4_CHICK Ubiquitin carboxyl-terminal hydrolase OS=Gallus gallus OX=9031 GN=USP5 PE=3 SV=4	NaN	23.4459	6	88.376	0	71.818	422780000
A0A3Q2U4U0;Q5ZLJ6	tr|A0A3Q2U4U0|A0A3Q2U4U0_CHICK Uncharacterized protein OS=Gallus gallus OX=9031 GN=TMEM57 PE=3 SV=1;tr|Q5ZLJ6|Q5ZLJ6_CHICK Uncharacterized protein OS=Gallus gallus OX=9031 GN=TMEM57 PE=2 SV=1	NaN	21.6218	1	73.864	0.0023447	6.1754	109720000
A0A3Q2U4V3;E1BZY5	tr|A0A3Q2U4V3|A0A3Q2U4V3_CHICK Tryptophanyl-tRNA synthetase OS=Gallus gallus OX=9031 GN=LOC101750690 PE=3 SV=1;tr|E1BZY5|E1BZY5_CHICK Tryptophanyl-tRNA synthetase OS=Gallus gallus OX=9031 GN=LOC101750690 PE=3 SV=3	NaN	20.9209	2	36.743	0	11.936	25807000
A0A3Q2U4W6;A0A3Q2UDF8;A0A3Q3AF88	tr|A0A3Q2U4W6|A0A3Q2U4W6_CHICK GATA-type domain-containing protein OS=Gallus gallus OX=9031 GN=GATAD2B PE=4 SV=1;tr|A0A3Q2UDF8|A0A3Q2UDF8_CHICK GATA-type domain-containing protein OS=Gallus gallus OX=9031 GN=GATAD2B PE=4 SV=1;tr|A0A3Q3AF88|A0A3Q3AF88_CHICK	NaN	18.363	1	67.292	0.00044444	7.7545	9102700
A0A3Q2U523	tr|A0A3Q2U523|A0A3Q2U523_CHICK Cytoplasmic tRNA 2-thiolation protein 2 OS=Gallus gallus OX=9031 GN=CTU2 PE=3 SV=1	NaN	20.2865	1	52.233	0.0012235	6.6276	34530000
A0A3Q2U525	tr|A0A3Q2U525|A0A3Q2U525_CHICK Uncharacterized protein OS=Gallus gallus OX=9031 GN=LOC107050163 PE=4 SV=1	NaN	20.6286	1	34.815	0.002399	6.3953	29182000
Q9PW38;E1C756;A0A3Q3AR23;A0A3Q2UG07;A0A3Q2U543;A0A3Q2UBZ3;A0A3Q2UG45;A0A3Q2U679;A0A3Q2U7L3	sp|Q9PW38|GEPH_CHICK Gephyrin OS=Gallus gallus OX=9031 GN=GPHN PE=1 SV=1;tr|E1C756|E1C756_CHICK Molybdopterin molybdenumtransferase OS=Gallus gallus OX=9031 GN=GPHN PE=3 SV=3;tr|A0A3Q3AR23|A0A3Q3AR23_CHICK Molybdopterin molybdenumtransferase OS=Gallus gall	NaN	21.17	2	79.72	0	22.841	92021000
A0A3Q2U578;P84247;P84229;A0A452J857	tr|A0A3Q2U578|A0A3Q2U578_CHICK Histone H3 OS=Gallus gallus OX=9031 PE=3 SV=1;sp|P84247|H33_CHICK Histone H3.3 OS=Gallus gallus OX=9031 GN=H3-IX PE=1 SV=2;sp|P84229|H32_CHICK Histone H3.2 OS=Gallus gallus OX=9031 GN=H3-I PE=1 SV=2;tr|A0A452J857|A0A452J857_C	26.2983	29.9832	2	10.927	0	45.385	4575300000
F1NP51;A0A3Q2U596	tr|F1NP51|F1NP51_CHICK Lamin-A OS=Gallus gallus OX=9031 GN=LMNA PE=3 SV=3;tr|A0A3Q2U596|A0A3Q2U596_CHICK Lamin-A OS=Gallus gallus OX=9031 GN=LMNA PE=3 SV=1	NaN	26.9788	2	71.226	0	323.31	5025800000
A0A3Q2U5G8	tr|A0A3Q2U5G8|A0A3Q2U5G8_CHICK Uncharacterized protein OS=Gallus gallus OX=9031 PE=4 SV=1	NaN	24.2437	6	39.877	0	99.903	397310000
A0A3Q2U5K7;A0A3Q3A9L2	tr|A0A3Q2U5K7|A0A3Q2U5K7_CHICK Peptidylprolyl isomerase OS=Gallus gallus OX=9031 GN=LOC107050883 PE=4 SV=1;tr|A0A3Q3A9L2|A0A3Q3A9L2_CHICK Peptidylprolyl isomerase OS=Gallus gallus OX=9031 GN=LOC107050883 PE=4 SV=1	NaN	21.2656	2	15.115	0	13.298	20169000
F1P2P3;A0A3Q2U5P8	tr|F1P2P3|F1P2P3_CHICK Cysteinyl-tRNA synthetase OS=Gallus gallus OX=9031 GN=CARS2 PE=4 SV=4;tr|A0A3Q2U5P8|A0A3Q2U5P8_CHICK Cysteinyl-tRNA synthetase OS=Gallus gallus OX=9031 GN=CARS2 PE=4 SV=1	NaN	19.6471	2	52.711	0	12.751	20526000
A0A3Q2UA27;A0A3Q2U5Q3;F1NKH3;A0A3Q3AI01	tr|A0A3Q2UA27|A0A3Q2UA27_CHICK Uncharacterized protein OS=Gallus gallus OX=9031 GN=HOOK3 PE=4 SV=1;tr|A0A3Q2U5Q3|A0A3Q2U5Q3_CHICK Calponin-homology (CH) domain-containing protein OS=Gallus gallus OX=9031 GN=HOOK3 PE=4 SV=1;tr|F1NKH3|F1NKH3_CHICK Calponin-h	NaN	19.4998	2	63.395	0	12.582	21499000
A0A3Q2U5U9	tr|A0A3Q2U5U9|A0A3Q2U5U9_CHICK Uncharacterized protein OS=Gallus gallus OX=9031 PE=4 SV=1	NaN	23.6159	1	19.858	0.00047847	10.556	115710000
F1NS13;A0A3Q2U611;A0A3Q2U7G9	tr|F1NS13|F1NS13_CHICK Leuk-A4-hydro_C domain-containing protein OS=Gallus gallus OX=9031 GN=RNPEP PE=3 SV=4;tr|A0A3Q2U611|A0A3Q2U611_CHICK Leuk-A4-hydro_C domain-containing protein OS=Gallus gallus OX=9031 GN=RNPEP PE=3 SV=1;tr|A0A3Q2U7G9|A0A3Q2U7G9_CHICK	NaN	18.7494	2	66.389	0	14.32	16305000
A0A3Q2U656;E1BQF6	tr|A0A3Q2U656|A0A3Q2U656_CHICK PX domain-containing protein OS=Gallus gallus OX=9031 GN=SNX4 PE=3 SV=1;tr|E1BQF6|E1BQF6_CHICK PX domain-containing protein OS=Gallus gallus OX=9031 GN=SNX4 PE=3 SV=2	NaN	20.239	3	46.734	0	19.955	29701000
A0A3Q2U669	tr|A0A3Q2U669|A0A3Q2U669_CHICK Uncharacterized protein OS=Gallus gallus OX=9031 PE=4 SV=1	NaN	24.2032	2	13.246	0	14.718	96577000
F1NBW0;A0A3Q2U6F8	tr|F1NBW0|F1NBW0_CHICK Uncharacterized protein OS=Gallus gallus OX=9031 GN=MTPAP PE=1 SV=2;tr|A0A3Q2U6F8|A0A3Q2U6F8_CHICK Uncharacterized protein OS=Gallus gallus OX=9031 GN=MTPAP PE=4 SV=1	NaN	18.9273	3	63.806	0	19.265	17448000
Q5ZJA7;A0A3Q3ARC0;A0A3Q2U6U8;A0A1D5P975	tr|Q5ZJA7|Q5ZJA7_CHICK Transket_pyr domain-containing protein OS=Gallus gallus OX=9031 GN=LOC107054982 PE=2 SV=1;tr|A0A3Q3ARC0|A0A3Q3ARC0_CHICK Transket_pyr domain-containing protein OS=Gallus gallus OX=9031 GN=LOC107054982 PE=3 SV=1;tr|A0A3Q2U6U8|A0A3Q2U6	NaN	23.2277	5	115.18	0	126.17	422370000
A0A3Q2U6W6	tr|A0A3Q2U6W6|A0A3Q2U6W6_CHICK B30.2/SPRY domain-containing protein OS=Gallus gallus OX=9031 GN=HNRNPUL1 PE=4 SV=1	NaN	19.5521	2	92.862	0	41.981	30749000
A0A3Q2U9E9;A0A3Q2U766;F1NPA2	tr|A0A3Q2U9E9|A0A3Q2U9E9_CHICK PCI domain-containing protein OS=Gallus gallus OX=9031 GN=PSMD11 PE=3 SV=1;tr|A0A3Q2U766|A0A3Q2U766_CHICK Uncharacterized protein OS=Gallus gallus OX=9031 GN=PSMD11 PE=3 SV=1;tr|F1NPA2|F1NPA2_CHICK PCI domain-containing prote	NaN	25.353	8	43.425	0	205.36	985670000
A0A3Q2U784	tr|A0A3Q2U784|A0A3Q2U784_CHICK Small nuclear ribonucleoprotein Sm D2 OS=Gallus gallus OX=9031 GN=SNRPD2 PE=3 SV=1	NaN	18.6362	1	16.22	0	32.889	3666900
A0A3Q2U797	tr|A0A3Q2U797|A0A3Q2U797_CHICK TFIIS N-terminal domain-containing protein OS=Gallus gallus OX=9031 GN=LOC100859302 PE=4 SV=1	NaN	21.0822	1	50.106	0.0031008	6.0956	59944000
A0A3Q2U7A5	tr|A0A3Q2U7A5|A0A3Q2U7A5_CHICK B3_4 domain-containing protein OS=Gallus gallus OX=9031 GN=LRRC47 PE=4 SV=1	NaN	21.0119	3	60.859	0	22.273	63436000
A0A3Q2U7I7;A0A1D5PII6	tr|A0A3Q2U7I7|A0A3Q2U7I7_CHICK RuvB-like helicase OS=Gallus gallus OX=9031 GN=LOC107051177 PE=3 SV=1;tr|A0A1D5PII6|A0A1D5PII6_CHICK RuvB-like helicase OS=Gallus gallus OX=9031 GN=LOC107051177 PE=3 SV=2	NaN	26.0877	19	51.043	0	218.9	1925600000
A0A3Q2U7J1;F1P2F4	tr|A0A3Q2U7J1|A0A3Q2U7J1_CHICK 39S ribosomal protein L22, mitochondrial OS=Gallus gallus OX=9031 GN=MRPL22 PE=3 SV=1;tr|F1P2F4|F1P2F4_CHICK 39S ribosomal protein L22, mitochondrial OS=Gallus gallus OX=9031 GN=MRPL22 PE=3 SV=3	NaN	22.5616	2	23.863	0	15.207	80478000
A0A3Q2U7Q1	tr|A0A3Q2U7Q1|A0A3Q2U7Q1_CHICK Uncharacterized protein OS=Gallus gallus OX=9031 PE=4 SV=1	NaN	22.8436	1	18.562	0	15.986	60213000
A0A3Q2U7V0;E1BV75	tr|A0A3Q2U7V0|A0A3Q2U7V0_CHICK Uncharacterized protein OS=Gallus gallus OX=9031 GN=DHRS7 PE=3 SV=1;tr|E1BV75|E1BV75_CHICK Uncharacterized protein OS=Gallus gallus OX=9031 GN=DHRS7 PE=3 SV=1	NaN	22.3742	3	35.162	0	21.04	92417000
A0A3Q2U7V2;A0A3Q2UCX4	tr|A0A3Q2U7V2|A0A3Q2U7V2_CHICK PDZ domain-containing protein OS=Gallus gallus OX=9031 GN=GIPC1 PE=3 SV=1;tr|A0A3Q2UCX4|A0A3Q2UCX4_CHICK PDZ domain-containing protein OS=Gallus gallus OX=9031 GN=GIPC1 PE=3 SV=1	NaN	22.0291	4	55.056	0	32.648	115550000
E1C9D8;A0A3Q2U7Z9	tr|E1C9D8|E1C9D8_CHICK tRNA-uridine aminocarboxypropyltransferase OS=Gallus gallus OX=9031 GN=DTWD1 PE=4 SV=3;tr|A0A3Q2U7Z9|A0A3Q2U7Z9_CHICK tRNA-uridine aminocarboxypropyltransferase OS=Gallus gallus OX=9031 GN=DTWD1 PE=4 SV=1	NaN	18.8658	1	35.284	0.00084459	7.0632	8121300
A0A3Q2U825	tr|A0A3Q2U825|A0A3Q2U825_CHICK 40S ribosomal protein S28 OS=Gallus gallus OX=9031 GN=RPS28 PE=3 SV=1	NaN	21.1956	2	7.8409	0	18.1	7205200
F1NU79;A0A3Q2U839;A0A3Q2TZA6	tr|F1NU79|F1NU79_CHICK AAA domain-containing protein OS=Gallus gallus OX=9031 GN=PSMC5 PE=3 SV=2;tr|A0A3Q2U839|A0A3Q2U839_CHICK AAA domain-containing protein OS=Gallus gallus OX=9031 GN=PSMC5 PE=3 SV=1;tr|A0A3Q2TZA6|A0A3Q2TZA6_CHICK AAA domain-containing p	NaN	25.0157	12	46.172	0	111.1	814130000
F1P1B7;A0A3Q2U853	tr|F1P1B7|F1P1B7_CHICK Uncharacterized protein OS=Gallus gallus OX=9031 GN=NAP1L4 PE=3 SV=1;tr|A0A3Q2U853|A0A3Q2U853_CHICK Uncharacterized protein OS=Gallus gallus OX=9031 GN=NAP1L4 PE=3 SV=1	NaN	24.3162	5	42.895	0	134.56	334220000
A0A3Q2U8I0	tr|A0A3Q2U8I0|A0A3Q2U8I0_CHICK Uncharacterized protein OS=Gallus gallus OX=9031 GN=OPA3 PE=3 SV=1	NaN	22.1909	1	18.028	0.0023744	6.2785	33514000
A0A3Q2U8J0	tr|A0A3Q2U8J0|A0A3Q2U8J0_CHICK S4 RNA-binding domain-containing protein OS=Gallus gallus OX=9031 GN=IMP3 PE=3 SV=1	NaN	21.7474	2	21.187	0	22.809	42247000
A0A3Q2U8J2	tr|A0A3Q2U8J2|A0A3Q2U8J2_CHICK Glucose-6-phosphatase OS=Gallus gallus OX=9031 GN=G6PC3 PE=3 SV=1	NaN	18.2752	1	37.148	0.00082988	6.8215	4441300
A0A3Q2U8W3	tr|A0A3Q2U8W3|A0A3Q2U8W3_CHICK TNase-like domain-containing protein OS=Gallus gallus OX=9031 PE=4 SV=1	NaN	21.0018	1	24.587	0	12.547	27296000
A0A3Q2U8W6;F1P174	tr|A0A3Q2U8W6|A0A3Q2U8W6_CHICK Peptidase_M3 domain-containing protein OS=Gallus gallus OX=9031 GN=MIPEP PE=3 SV=1;tr|F1P174|F1P174_CHICK Peptidase_M3 domain-containing protein OS=Gallus gallus OX=9031 GN=MIPEP PE=3 SV=4	NaN	21.3551	3	73.001	0	20.454	91205000
A0A3Q3AWJ8;A0A3Q2U901	tr|A0A3Q3AWJ8|A0A3Q3AWJ8_CHICK XRCC1_N domain-containing protein OS=Gallus gallus OX=9031 PE=4 SV=1;tr|A0A3Q2U901|A0A3Q2U901_CHICK XRCC1_N domain-containing protein OS=Gallus gallus OX=9031 PE=4 SV=1	NaN	20.4257	1	12.665	0.00046447	8.9968	14085000
A0A3Q2UAH3;A0A3Q2U943;A0A1D5P0C5	tr|A0A3Q2UAH3|A0A3Q2UAH3_CHICK Uncharacterized protein OS=Gallus gallus OX=9031 GN=UBTF PE=4 SV=1;tr|A0A3Q2U943|A0A3Q2U943_CHICK Uncharacterized protein OS=Gallus gallus OX=9031 GN=UBTF PE=4 SV=1;tr|A0A1D5P0C5|A0A1D5P0C5_CHICK Uncharacterized protein OS=Ga	NaN	20.952	2	82.314	0	24.067	75055000
A0A3Q2U983	tr|A0A3Q2U983|A0A3Q2U983_CHICK Lipoyl-binding domain-containing protein OS=Gallus gallus OX=9031 GN=PC PE=4 SV=1	NaN	24.0768	4	34.402	0	43.176	300810000
F1P0Y0;A0A3Q2U985	tr|F1P0Y0|F1P0Y0_CHICK Uncharacterized protein OS=Gallus gallus OX=9031 GN=CKAP5 PE=4 SV=1;tr|A0A3Q2U985|A0A3Q2U985_CHICK Uncharacterized protein OS=Gallus gallus OX=9031 GN=CKAP5 PE=4 SV=1	NaN	19.361	2	225.35	0.00047916	10.641	70028000
A0A3Q2U9K8	tr|A0A3Q2U9K8|A0A3Q2U9K8_CHICK Phosphoenolpyruvate carboxykinase (GTP) OS=Gallus gallus OX=9031 GN=PCK2 PE=3 SV=1	NaN	21.594	1	45.096	0.00044464	7.7586	79138000
Q5ZMW3;A0A3Q2U9L4	sp|Q5ZMW3|API5_CHICK Apoptosis inhibitor 5 OS=Gallus gallus OX=9031 GN=API5 PE=2 SV=1;tr|A0A3Q2U9L4|A0A3Q2U9L4_CHICK Apoptosis inhibitor 5 OS=Gallus gallus OX=9031 GN=API5 PE=3 SV=1	NaN	23.9718	6	58.608	0	47.68	411310000
A0A3Q2U9M3	tr|A0A3Q2U9M3|A0A3Q2U9M3_CHICK Ig-like domain-containing protein OS=Gallus gallus OX=9031 PE=4 SV=1	NaN	23.5107	1	9.7115	0	10.767	59762000
F1NIM4;A0A3Q3B0L8;A0A3Q2U9P1	tr|F1NIM4|F1NIM4_CHICK Peptidylprolyl isomerase OS=Gallus gallus OX=9031 GN=FKBP4 PE=4 SV=1;tr|A0A3Q3B0L8|A0A3Q3B0L8_CHICK Peptidylprolyl isomerase OS=Gallus gallus OX=9031 GN=FKBP4 PE=4 SV=1;tr|A0A3Q2U9P1|A0A3Q2U9P1_CHICK Peptidylprolyl isomerase OS=Gallu	NaN	26.0632	12	50.445	0	154.35	1963100000
A0A3Q2U9R2	tr|A0A3Q2U9R2|A0A3Q2U9R2_CHICK GST N-terminal domain-containing protein OS=Gallus gallus OX=9031 PE=4 SV=1	NaN	28.4302	2	6.7626	0	66.221	1085100000
A0A3Q2U9U1	tr|A0A3Q2U9U1|A0A3Q2U9U1_CHICK mRNA_decap_C domain-containing protein OS=Gallus gallus OX=9031 GN=DCP1B PE=3 SV=1	NaN	18.4156	1	66.421	0.00047664	10.398	9440400
E1BS68;A0A3Q2UA15	tr|E1BS68|E1BS68_CHICK PRKCSH_1 domain-containing protein OS=Gallus gallus OX=9031 GN=GNPTG PE=4 SV=2;tr|A0A3Q2UA15|A0A3Q2UA15_CHICK PRKCSH_1 domain-containing protein OS=Gallus gallus OX=9031 GN=GNPTG PE=4 SV=1	NaN	18.6492	1	34.795	0.0030936	6.0785	6166800
A0A3Q2UA24	tr|A0A3Q2UA24|A0A3Q2UA24_CHICK Uncharacterized protein OS=Gallus gallus OX=9031 GN=LOC107051263 PE=4 SV=1	NaN	20.546	2	116.39	0	12.292	61238000
A0A3Q2UAA1	tr|A0A3Q2UAA1|A0A3Q2UAA1_CHICK J domain-containing protein OS=Gallus gallus OX=9031 GN=LOC107049075 PE=4 SV=1	NaN	21.7516	5	37.995	0	33.376	67087000
A0A3Q2UAA5	tr|A0A3Q2UAA5|A0A3Q2UAA5_CHICK Ig-like domain-containing protein OS=Gallus gallus OX=9031 GN=LOC107051274 PE=4 SV=1	21.8784	26.9803	3	12.905	0	30.721	817550000
A0A3Q2UGS6;A0A3Q3A7T9;A0A3Q2UAB1;H9L0K6	tr|A0A3Q2UGS6|A0A3Q2UGS6_CHICK Uncharacterized protein OS=Gallus gallus OX=9031 GN=KANSL3 PE=4 SV=1;tr|A0A3Q3A7T9|A0A3Q3A7T9_CHICK Uncharacterized protein OS=Gallus gallus OX=9031 GN=KANSL3 PE=4 SV=1;tr|A0A3Q2UAB1|A0A3Q2UAB1_CHICK Uncharacterized protein O	NaN	17.6316	1	96.767	0.0057143	5.9554	9138200
A0A3Q2UAD4	tr|A0A3Q2UAD4|A0A3Q2UAD4_CHICK Dihydroxyacetone phosphate acyltransferase OS=Gallus gallus OX=9031 GN=PDCD2 PE=3 SV=1	NaN	18.9461	1	71.605	0.0060652	5.9255	18182000
A0A3Q2UAF1;A0A3Q3ALF5	tr|A0A3Q2UAF1|A0A3Q2UAF1_CHICK Uncharacterized protein OS=Gallus gallus OX=9031 GN=GRIPAP1 PE=4 SV=1;tr|A0A3Q3ALF5|A0A3Q3ALF5_CHICK Uncharacterized protein OS=Gallus gallus OX=9031 GN=GRIPAP1 PE=4 SV=1	NaN	18.3754	1	77.656	0.0031165	6.1429	12242000
Q5ZHY2;A0A3Q2UAH4	tr|Q5ZHY2|Q5ZHY2_CHICK Uncharacterized protein OS=Gallus gallus OX=9031 GN=MYEF2 PE=2 SV=1;tr|A0A3Q2UAH4|A0A3Q2UAH4_CHICK Uncharacterized protein OS=Gallus gallus OX=9031 GN=MYEF2 PE=4 SV=1	NaN	23.0187	5	65.699	0	64.928	237940000
A0A3Q2UAJ4;F1NI05	tr|A0A3Q2UAJ4|A0A3Q2UAJ4_CHICK Uncharacterized protein OS=Gallus gallus OX=9031 GN=LAMC1 PE=4 SV=1;tr|F1NI05|F1NI05_CHICK Uncharacterized protein OS=Gallus gallus OX=9031 GN=LAMC1 PE=4 SV=3	NaN	19.4231	4	175.3	0	32.417	52020000
Q9IAM7;A0A3Q2UAJ7;F1NYL0	sp|Q9IAM7|MRE11_CHICK Double-strand break repair protein MRE11 OS=Gallus gallus OX=9031 GN=MRE11 PE=2 SV=1;tr|A0A3Q2UAJ7|A0A3Q2UAJ7_CHICK Double-strand break repair protein OS=Gallus gallus OX=9031 GN=MRE11 PE=3 SV=1;tr|F1NYL0|F1NYL0_CHICK Double-strand br	NaN	19.5368	2	80.023	0	15.507	25861000
Q5ZL91;A0A3Q2UAM0;F1NPA4	sp|Q5ZL91|INT7_CHICK Integrator complex subunit 7 OS=Gallus gallus OX=9031 GN=INTS7 PE=2 SV=1;tr|A0A3Q2UAM0|A0A3Q2UAM0_CHICK Integrator complex subunit 7 OS=Gallus gallus OX=9031 GN=INTS7 PE=3 SV=1;tr|F1NPA4|F1NPA4_CHICK Integrator complex subunit 7 OS=Gal	NaN	18.6437	1	106.53	0.0023631	6.251	20069000
A0A3Q2UAX9;F1NC78	tr|A0A3Q2UAX9|A0A3Q2UAX9_CHICK U3 small nucleolar ribonucleoprotein protein MPP10 OS=Gallus gallus OX=9031 GN=MPHOSPH10 PE=3 SV=1;tr|F1NC78|F1NC78_CHICK U3 small nucleolar ribonucleoprotein protein MPP10 OS=Gallus gallus OX=9031 GN=MPHOSPH10 PE=3 SV=4	NaN	21.0031	4	75.73	0	25.314	54643000
A0A3Q2UB09;A0A3Q3AJS4;E1BRJ4	tr|A0A3Q2UB09|A0A3Q2UB09_CHICK DNA-directed RNA polymerase subunit beta OS=Gallus gallus OX=9031 GN=POLR3B PE=3 SV=1;tr|A0A3Q3AJS4|A0A3Q3AJS4_CHICK DNA-directed RNA polymerase subunit beta OS=Gallus gallus OX=9031 GN=POLR3B PE=3 SV=1;tr|E1BRJ4|E1BRJ4_CHICK	NaN	16.0644	1	125.21	0.00085507	7.245	3700500
A0A3Q2UB69	tr|A0A3Q2UB69|A0A3Q2UB69_CHICK Anaphase-promoting complex subunit 11 OS=Gallus gallus OX=9031 PE=3 SV=1	NaN	17.6872	1	37.637	1	-2	4221100
A0A3Q2UB91;E1C122	tr|A0A3Q2UB91|A0A3Q2UB91_CHICK ELMO domain-containing protein OS=Gallus gallus OX=9031 GN=ELMO2 PE=4 SV=1;tr|E1C122|E1C122_CHICK ELMO domain-containing protein OS=Gallus gallus OX=9031 GN=ELMO2 PE=4 SV=4	NaN	18.1916	3	82.861	0	22.418	11376000
A0A3Q2UBD9	tr|A0A3Q2UBD9|A0A3Q2UBD9_CHICK Protein kinase domain-containing protein OS=Gallus gallus OX=9031 GN=CDK5 PE=4 SV=1	NaN	18.3814	1	56.177	0.00082953	6.8151	7512200
O57604;F1NXC1;A0A3Q3AQL9;A0A3Q2UBE7	sp|O57604|PODXL_CHICK Podocalyxin OS=Gallus gallus OX=9031 GN=PODXL PE=1 SV=1;tr|F1NXC1|F1NXC1_CHICK Podocalyxin OS=Gallus gallus OX=9031 GN=PODXL PE=3 SV=2;tr|A0A3Q3AQL9|A0A3Q3AQL9_CHICK Podocalyxin OS=Gallus gallus OX=9031 GN=PODXL PE=3 SV=1;tr|A0A3Q2UBE	NaN	19.2591	1	61.014	0	21.769	17568000
A0A3Q2UBF5;Q00944;A0A1L1RJ83;A0A1D5NY34;A0A3Q2U9D2	tr|A0A3Q2UBF5|A0A3Q2UBF5_CHICK Non-specific protein-tyrosine kinase OS=Gallus gallus OX=9031 GN=PTK2 PE=4 SV=1;sp|Q00944|FAK1_CHICK Focal adhesion kinase 1 OS=Gallus gallus OX=9031 GN=PTK2 PE=1 SV=2;tr|A0A1L1RJ83|A0A1L1RJ83_CHICK Focal adhesion kinase 1 OS	NaN	18.4844	3	118.98	0	45.781	20904000
A0A3Q2UBI9;A0A3Q2UG94	tr|A0A3Q2UBI9|A0A3Q2UBI9_CHICK Uncharacterized protein OS=Gallus gallus OX=9031 GN=MRPL40 PE=3 SV=1;tr|A0A3Q2UG94|A0A3Q2UG94_CHICK Uncharacterized protein OS=Gallus gallus OX=9031 GN=MRPL40 PE=3 SV=1	NaN	23.1323	5	33.205	0	33.965	156300000
A0A3Q2UBJ7;A0A3Q2UCL2;R4GGS3	tr|A0A3Q2UBJ7|A0A3Q2UBJ7_CHICK HIT domain-containing protein OS=Gallus gallus OX=9031 GN=HINT1 PE=4 SV=1;tr|A0A3Q2UCL2|A0A3Q2UCL2_CHICK HIT domain-containing protein OS=Gallus gallus OX=9031 GN=HINT1 PE=4 SV=1;tr|R4GGS3|R4GGS3_CHICK HIT domain-containing p	NaN	22.213	1	16.915	0	18.548	48616000
A0A3Q2UBQ4	tr|A0A3Q2UBQ4|A0A3Q2UBQ4_CHICK Protein-serine/threonine phosphatase OS=Gallus gallus OX=9031 PE=3 SV=1	NaN	23.3764	2	20.113	0	52.236	108890000
E1C959;A0A3Q2UBR5;A0A3Q2UMN6	tr|E1C959|E1C959_CHICK Uncharacterized protein OS=Gallus gallus OX=9031 GN=CWF19L1 PE=3 SV=3;tr|A0A3Q2UBR5|A0A3Q2UBR5_CHICK Uncharacterized protein OS=Gallus gallus OX=9031 GN=CWF19L1 PE=3 SV=1;tr|A0A3Q2UMN6|A0A3Q2UMN6_CHICK CwfJ_C_1 domain-containing prot	NaN	23.2256	6	55.976	0	66.761	176550000
F1P591;A0A3Q2UCG9	tr|F1P591|F1P591_CHICK Conserved oligomeric Golgi complex subunit 6 OS=Gallus gallus OX=9031 GN=COG6 PE=3 SV=3;tr|A0A3Q2UCG9|A0A3Q2UCG9_CHICK Conserved oligomeric Golgi complex subunit 6 OS=Gallus gallus OX=9031 GN=COG6 PE=3 SV=1	NaN	17.1009	1	67.074	0.00045434	8.1832	4498400
A0A3Q2UCH4	tr|A0A3Q2UCH4|A0A3Q2UCH4_CHICK Hsp90 chaperone protein kinase-targeting subunit OS=Gallus gallus OX=9031 GN=CDC37 PE=3 SV=1	NaN	24.0272	7	58.882	0	94.527	376140000
E1BVR7;A0A3Q2UCN9	tr|E1BVR7|E1BVR7_CHICK PPM-type phosphatase domain-containing protein OS=Gallus gallus OX=9031 GN=PPM1G PE=3 SV=3;tr|A0A3Q2UCN9|A0A3Q2UCN9_CHICK PPM-type phosphatase domain-containing protein OS=Gallus gallus OX=9031 GN=PPM1G PE=3 SV=1	NaN	21.1903	2	57.7	0	20.138	55036000
A0A3Q2UCR0;Q5ZLS0	tr|A0A3Q2UCR0|A0A3Q2UCR0_CHICK RRM domain-containing protein OS=Gallus gallus OX=9031 GN=CSTF2 PE=4 SV=1;tr|Q5ZLS0|Q5ZLS0_CHICK RRM domain-containing protein OS=Gallus gallus OX=9031 GN=CSTF2 PE=2 SV=1	NaN	23.8937	6	60.154	0	57.395	358460000
A0A3Q2UCT2;F1NR99	tr|A0A3Q2UCT2|A0A3Q2UCT2_CHICK Coproporphyrinogen oxidase OS=Gallus gallus OX=9031 GN=CPOX PE=3 SV=1;tr|F1NR99|F1NR99_CHICK Coproporphyrinogen oxidase OS=Gallus gallus OX=9031 GN=CPOX PE=3 SV=5	NaN	21.6954	4	32.839	0	25.046	50938000
A0A3Q2UCU3;A0A3Q2UJK8;A0A3Q2UFX5;A0A3Q2UH03;A0A3Q2TXP7;A0A3Q2TZA1;A0A3Q3AIA0;A0A3Q2UGD4;A0A3Q2U474;A0A3Q2TW03;A0A3Q3AN21;A0A3Q2TY60;A0A3Q2TYY3;A0A3Q3AMX7;A0A3Q2U8X8;A0A3Q2UBY5;A0A3Q2UDB6;A0A3Q2UFG5;A0A1D5PAQ0;A0A3Q3AF81	tr|A0A3Q2UCU3|A0A3Q2UCU3_CHICK Ig-like domain-containing protein OS=Gallus gallus OX=9031 PE=4 SV=1;tr|A0A3Q2UJK8|A0A3Q2UJK8_CHICK Ig-like domain-containing protein OS=Gallus gallus OX=9031 PE=4 SV=1;tr|A0A3Q2UFX5|A0A3Q2UFX5_CHICK Ig-like domain-containing	NaN	21.4019	1	10.488	0.0008558	7.2545	16625000
A0A3Q2UCU8	tr|A0A3Q2UCU8|A0A3Q2UCU8_CHICK Apolipoprotein B mRNA editing enzyme catalytic polypeptide like 4 OS=Gallus gallus OX=9031 GN=APOBEC4 PE=2 SV=1	NaN	22.0978	1	38.997	0.0067618	5.839	62840000
E1BS79;A0A3Q2UCV7	tr|E1BS79|E1BS79_CHICK TPR_REGION domain-containing protein OS=Gallus gallus OX=9031 GN=GPSM1 PE=3 SV=4;tr|A0A3Q2UCV7|A0A3Q2UCV7_CHICK TPR_REGION domain-containing protein OS=Gallus gallus OX=9031 GN=GPSM1 PE=3 SV=1	NaN	19.9391	1	67.335	0.0070922	5.7969	31163000
A0A3Q2UCZ2;E1BZK0	tr|A0A3Q2UCZ2|A0A3Q2UCZ2_CHICK Uncharacterized protein OS=Gallus gallus OX=9031 GN=HTT PE=3 SV=1;tr|E1BZK0|E1BZK0_CHICK Uncharacterized protein OS=Gallus gallus OX=9031 GN=HTT PE=3 SV=4	NaN	20.1056	1	342.46	1	-2	163590000
A0A3Q2UD25	tr|A0A3Q2UD25|A0A3Q2UD25_CHICK Uncharacterized protein OS=Gallus gallus OX=9031 GN=LOC426220 PE=3 SV=1	NaN	25.0651	3	18.339	0	25.88	245730000
E1C200;A0A3Q2UD60	tr|E1C200|E1C200_CHICK Protein-tyrosine sulfotransferase OS=Gallus gallus OX=9031 GN=TPST1 PE=3 SV=2;tr|A0A3Q2UD60|A0A3Q2UD60_CHICK Protein-tyrosine sulfotransferase OS=Gallus gallus OX=9031 GN=TPST1 PE=3 SV=1	NaN	21.0806	2	42.04	0	12.19	44355000
A0A3Q2UD98	tr|A0A3Q2UD98|A0A3Q2UD98_CHICK EMI domain-containing protein OS=Gallus gallus OX=9031 PE=4 SV=1	21.4863	21.1702	1	60.46	0.00043802	7.5424	143030000
H9L0D7;A0A3Q2UDD0	tr|H9L0D7|H9L0D7_CHICK Wiskott-Aldrich syndrome protein family member OS=Gallus gallus OX=9031 GN=WASF2 PE=3 SV=2;tr|A0A3Q2UDD0|A0A3Q2UDD0_CHICK Wiskott-Aldrich syndrome protein family member OS=Gallus gallus OX=9031 GN=WASF2 PE=3 SV=1	NaN	20.2202	2	54.485	0	19.383	20766000
A0A3Q2UDD3	tr|A0A3Q2UDD3|A0A3Q2UDD3_CHICK RNA helicase OS=Gallus gallus OX=9031 GN=DDX28 PE=4 SV=1	NaN	17.196	1	63.011	0	11.363	4504400
A0A3Q3AHL7;A0A3Q2UDG3	tr|A0A3Q3AHL7|A0A3Q3AHL7_CHICK eIF-3c_N domain-containing protein OS=Gallus gallus OX=9031 PE=4 SV=1;tr|A0A3Q2UDG3|A0A3Q2UDG3_CHICK eIF-3c_N domain-containing protein OS=Gallus gallus OX=9031 PE=4 SV=1	NaN	22.2442	1	16.508	0.00045809	8.4198	39743000
Q9PSW9;P0C1H4;P0C1H3;A0A3Q2UDI2;P0C1H5	sp|Q9PSW9|H2B8_CHICK Histone H2B 8 OS=Gallus gallus OX=9031 GN=H2B-VIII PE=1 SV=3;sp|P0C1H4|H2B5_CHICK Histone H2B 5 OS=Gallus gallus OX=9031 GN=H2B-V PE=1 SV=2;sp|P0C1H3|H2B1_CHICK Histone H2B 1/2/3/4/6 OS=Gallus gallus OX=9031 GN=H2B-I PE=1 SV=2;tr|A0A3Q	24.9614	30.0851	6	13.964	0	86.705	8202000000
A0A3Q2UDT6;A0A1D5PKA9	tr|A0A3Q2UDT6|A0A3Q2UDT6_CHICK Uncharacterized protein OS=Gallus gallus OX=9031 GN=NPEPPS PE=3 SV=1;tr|A0A1D5PKA9|A0A1D5PKA9_CHICK Uncharacterized protein OS=Gallus gallus OX=9031 GN=NPEPPS PE=3 SV=2	NaN	23.3754	13	124.22	0	161.7	663770000
A0A3Q2UEA2	tr|A0A3Q2UEA2|A0A3Q2UEA2_CHICK Protein lin-7 homolog OS=Gallus gallus OX=9031 GN=LIN7A PE=3 SV=1	NaN	18.0781	1	24.399	0.00047574	10.08	3320600
A0A3Q2UED6;P33879;A0A1I7Q3Y8	tr|A0A3Q2UED6|A0A3Q2UED6_CHICK Sodium/potassium-transporting ATPase subunit beta OS=Gallus gallus OX=9031 GN=ATP1B3 PE=3 SV=1;sp|P33879|AT1B3_CHICK Sodium/potassium-transporting ATPase subunit beta-3 OS=Gallus gallus OX=9031 GN=ATP1B3 PE=2 SV=1;tr|A0A1I7Q3	NaN	23.5394	3	32.712	0	47.896	158490000
A0A3Q2UEE3	tr|A0A3Q2UEE3|A0A3Q2UEE3_CHICK Isochorismatase domain-containing protein OS=Gallus gallus OX=9031 GN=LOC107050412 PE=3 SV=1	NaN	20.8348	3	50.112	0	23.858	35535000
A0A3Q2UEG2;A0A3Q2U7N3;A0A3Q2U1A5;Q5ZJ21	tr|A0A3Q2UEG2|A0A3Q2UEG2_CHICK Uncharacterized protein OS=Gallus gallus OX=9031 GN=CTNND1 PE=3 SV=1;tr|A0A3Q2U7N3|A0A3Q2U7N3_CHICK Uncharacterized protein OS=Gallus gallus OX=9031 GN=CTNND1 PE=3 SV=1;tr|A0A3Q2U1A5|A0A3Q2U1A5_CHICK Uncharacterized protein O	NaN	23.2939	15	104	0	217.14	514210000
A0A3Q3A2E9;A0A3Q2UEK4	tr|A0A3Q3A2E9|A0A3Q3A2E9_CHICK RRM domain-containing protein OS=Gallus gallus OX=9031 GN=PABPN1 PE=4 SV=1;tr|A0A3Q2UEK4|A0A3Q2UEK4_CHICK RRM domain-containing protein OS=Gallus gallus OX=9031 GN=PABPN1 PE=4 SV=1	NaN	21.4721	1	33.969	0.00047801	10.515	31999000
F1NF80;A0A3Q2UEL1	tr|F1NF80|F1NF80_CHICK Uncharacterized protein OS=Gallus gallus OX=9031 GN=PPCS PE=3 SV=3;tr|A0A3Q2UEL1|A0A3Q2UEL1_CHICK Uncharacterized protein OS=Gallus gallus OX=9031 GN=PPCS PE=3 SV=1	NaN	22.2837	5	40.576	0	114.37	117430000
A0A3Q2UEQ5	tr|A0A3Q2UEQ5|A0A3Q2UEQ5_CHICK Fission, mitochondrial 1 OS=Gallus gallus OX=9031 PE=3 SV=1	NaN	22.6749	1	17.663	0	11.769	60267000
A0A3Q2UEW0	tr|A0A3Q2UEW0|A0A3Q2UEW0_CHICK RNase_PH domain-containing protein OS=Gallus gallus OX=9031 GN=B9D2 PE=4 SV=1	NaN	21.2962	2	63.699	0	11.362	51502000
E1C538;A0A3Q2UEY5	tr|E1C538|E1C538_CHICK Nudix hydrolase domain-containing protein OS=Gallus gallus OX=9031 GN=NUDT21 PE=4 SV=4;tr|A0A3Q2UEY5|A0A3Q2UEY5_CHICK Nudix hydrolase domain-containing protein OS=Gallus gallus OX=9031 GN=NUDT21 PE=4 SV=1	NaN	24.2392	6	51.064	0	55.378	514880000
A0A3Q2UEZ7;F1NGX1;P26008;A0A1D5P4G6	tr|A0A3Q2UEZ7|A0A3Q2UEZ7_CHICK Integrin alpha-V OS=Gallus gallus OX=9031 GN=ITGAV PE=3 SV=1;tr|F1NGX1|F1NGX1_CHICK Integrin alpha-V OS=Gallus gallus OX=9031 GN=ITGAV PE=3 SV=2;sp|P26008|ITAV_CHICK Integrin alpha-V OS=Gallus gallus OX=9031 GN=ITGAV PE=2 SV=	NaN	19.1433	2	114.36	0	19.658	27215000
A0A3Q2UEZ9;E1C347;A0A1D5P1I2	tr|A0A3Q2UEZ9|A0A3Q2UEZ9_CHICK Uncharacterized protein OS=Gallus gallus OX=9031 GN=GNAO1 PE=4 SV=1;tr|E1C347|E1C347_CHICK Uncharacterized protein OS=Gallus gallus OX=9031 GN=GNAO1 PE=4 SV=3;tr|A0A1D5P1I2|A0A1D5P1I2_CHICK Uncharacterized protein OS=Gallus g	NaN	20.2847	1	40.173	0	19.02	20438000
A0A3Q2UF40;A0A3Q2UBH6;A0A3Q2U788;A0A3Q2UK59;A0A3Q2UFB8	tr|A0A3Q2UF40|A0A3Q2UF40_CHICK Uncharacterized protein OS=Gallus gallus OX=9031 GN=LOC107051050 PE=3 SV=1;tr|A0A3Q2UBH6|A0A3Q2UBH6_CHICK Uncharacterized protein OS=Gallus gallus OX=9031 GN=LOC107051050 PE=3 SV=1;tr|A0A3Q2U788|A0A3Q2U788_CHICK Uncharacteriz	NaN	24.6989	6	39.945	0	115.56	490220000
A0A3Q2UF74	tr|A0A3Q2UF74|A0A3Q2UF74_CHICK Uncharacterized protein OS=Gallus gallus OX=9031 GN=MOGS PE=3 SV=1	NaN	20.2571	7	91.966	0	47.893	57644000
Q5F408;A0A3Q2UF90	sp|Q5F408|SYCC_CHICK Cysteine--tRNA ligase, cytoplasmic OS=Gallus gallus OX=9031 GN=CARS1 PE=2 SV=1;tr|A0A3Q2UF90|A0A3Q2UF90_CHICK Cysteinyl-tRNA synthetase OS=Gallus gallus OX=9031 GN=CARS PE=3 SV=1	NaN	21.3097	4	85.8	0	35.562	114370000
A0A3Q2UFI7	tr|A0A3Q2UFI7|A0A3Q2UFI7_CHICK LsmAD domain-containing protein OS=Gallus gallus OX=9031 GN=LOC107050235 PE=4 SV=1	NaN	19.1694	1	31.899	0	11.294	7665100
A0A3Q2UFW2	tr|A0A3Q2UFW2|A0A3Q2UFW2_CHICK U2 snRNP auxiliary factor large subunit OS=Gallus gallus OX=9031 GN=U2AF2 PE=4 SV=1	NaN	24.0899	5	75.971	0	74.442	374970000
A0A3Q2UFW3;A0A3Q3AYR7	tr|A0A3Q2UFW3|A0A3Q2UFW3_CHICK t-SNARE coiled-coil homology domain-containing protein OS=Gallus gallus OX=9031 GN=STX5 PE=3 SV=1;tr|A0A3Q3AYR7|A0A3Q3AYR7_CHICK t-SNARE coiled-coil homology domain-containing protein OS=Gallus gallus OX=9031 GN=STX5 PE=3 SV=	NaN	20.083	2	36.474	0	21.157	18882000
Q5ZJD3;A0A3Q2UFZ4;F1P2L5	sp|Q5ZJD3|LSG1_CHICK Large subunit GTPase 1 homolog OS=Gallus gallus OX=9031 GN=LSG1 PE=2 SV=1;tr|A0A3Q2UFZ4|A0A3Q2UFZ4_CHICK Large subunit GTPase 1 homolog OS=Gallus gallus OX=9031 GN=LSG1 PE=4 SV=1;tr|F1P2L5|F1P2L5_CHICK Large subunit GTPase 1 homolog OS	NaN	21.3847	4	73.83	0	35.604	95829000
A0A3Q2UFZ9	tr|A0A3Q2UFZ9|A0A3Q2UFZ9_CHICK Uncharacterized protein OS=Gallus gallus OX=9031 GN=ASNA1 PE=4 SV=1	NaN	23.2139	3	36.834	0	23.687	116750000
A0A3Q2UGE4	tr|A0A3Q2UGE4|A0A3Q2UGE4_CHICK Uncharacterized protein OS=Gallus gallus OX=9031 GN=MRPL41 PE=3 SV=1	NaN	23.0274	4	15.188	0	31.584	76945000
A0A3Q2UGH8;E1C3Q4	tr|A0A3Q2UGH8|A0A3Q2UGH8_CHICK WD_REPEATS_REGION domain-containing protein OS=Gallus gallus OX=9031 GN=CSTF1 PE=4 SV=1;tr|E1C3Q4|E1C3Q4_CHICK WD_REPEATS_REGION domain-containing protein OS=Gallus gallus OX=9031 GN=CSTF1 PE=4 SV=4	NaN	22.1153	3	48.357	0	91.121	81777000
E1BUD8;A0A3Q2UGR5	tr|E1BUD8|E1BUD8_CHICK Uncharacterized protein OS=Gallus gallus OX=9031 GN=SEC24C PE=3 SV=3;tr|A0A3Q2UGR5|A0A3Q2UGR5_CHICK Uncharacterized protein OS=Gallus gallus OX=9031 GN=SEC24C PE=3 SV=1	NaN	21.6144	5	121.68	0	41.467	128420000
A0A3Q2UGT3;P10288	tr|A0A3Q2UGT3|A0A3Q2UGT3_CHICK Cadherin-2 OS=Gallus gallus OX=9031 GN=CDH2 PE=4 SV=1;sp|P10288|CADH2_CHICK Cadherin-2 OS=Gallus gallus OX=9031 GN=CDH2 PE=1 SV=1	NaN	21.8613	4	93.905	0	30.762	121910000
A0A3Q2UGX9	tr|A0A3Q2UGX9|A0A3Q2UGX9_CHICK Negative elongation factor E OS=Gallus gallus OX=9031 GN=NELFE PE=3 SV=1	NaN	22.4383	4	34.661	0	52.908	96617000
A0A3Q2UH51;A0A1D5P8J3;A0A1D5PE09	tr|A0A3Q2UH51|A0A3Q2UH51_CHICK Uncharacterized protein OS=Gallus gallus OX=9031 GN=LUC7L PE=3 SV=1;tr|A0A1D5P8J3|A0A1D5P8J3_CHICK Uncharacterized protein OS=Gallus gallus OX=9031 GN=LUC7L PE=3 SV=2;tr|A0A1D5PE09|A0A1D5PE09_CHICK Uncharacterized protein OS=	NaN	21.2298	2	39.224	0	20.168	39349000
A0A3Q2UHE4;F1NU55;Q01406	tr|A0A3Q2UHE4|A0A3Q2UHE4_CHICK SH3 domain-containing protein OS=Gallus gallus OX=9031 GN=CTTN PE=4 SV=1;tr|F1NU55|F1NU55_CHICK SH3 domain-containing protein OS=Gallus gallus OX=9031 GN=CTTN PE=4 SV=3;sp|Q01406|SRC8_CHICK Src substrate protein p85 OS=Gallus	NaN	21.8252	5	58.021	0	31.571	96606000
A0A3Q2UHI2;A0A3Q3B2W9	tr|A0A3Q2UHI2|A0A3Q2UHI2_CHICK Uncharacterized protein OS=Gallus gallus OX=9031 GN=TXLNA PE=3 SV=1;tr|A0A3Q3B2W9|A0A3Q3B2W9_CHICK Taxilin alpha OS=Gallus gallus OX=9031 GN=TXLNA PE=3 SV=1	NaN	19.845	1	59.763	0.0004649	9.0397	23543000
Q5ZIH1;A0A3Q2UHQ9	tr|Q5ZIH1|Q5ZIH1_CHICK Uncharacterized protein OS=Gallus gallus OX=9031 GN=HNRNPD PE=2 SV=1;tr|A0A3Q2UHQ9|A0A3Q2UHQ9_CHICK Uncharacterized protein OS=Gallus gallus OX=9031 GN=HNRNPD PE=4 SV=1	NaN	22.2872	1	29.355	0.00082068	6.7035	56300000
A0A3Q2UHT5	tr|A0A3Q2UHT5|A0A3Q2UHT5_CHICK S-AdoMet_synt_C domain-containing protein OS=Gallus gallus OX=9031 PE=4 SV=1	NaN	25.5828	3	40.942	0	23.173	301540000
A0A3Q2UHT9;F1NV47	tr|A0A3Q2UHT9|A0A3Q2UHT9_CHICK Uncharacterized protein OS=Gallus gallus OX=9031 GN=EHD4 PE=4 SV=1;tr|F1NV47|F1NV47_CHICK Uncharacterized protein OS=Gallus gallus OX=9031 GN=EHD4 PE=4 SV=4	NaN	19.9137	3	55.704	0	22.817	25679000
Q5F4A3;A0A3Q2UHZ1	sp|Q5F4A3|AN32E_CHICK Acidic leucine-rich nuclear phosphoprotein 32 family member E OS=Gallus gallus OX=9031 GN=ANP32E PE=2 SV=1;tr|A0A3Q2UHZ1|A0A3Q2UHZ1_CHICK Acidic leucine-rich nuclear phosphoprotein 32 family member E OS=Gallus gallus OX=9031 GN=ANP32E	NaN	22.9771	3	28.925	0	42.6	74309000
F7BQ59;A0A3Q3B0Q7;A0A3Q2UI11;A0A3Q3ALE1	tr|F7BQ59|F7BQ59_CHICK Uncharacterized protein OS=Gallus gallus OX=9031 GN=NFYA PE=4 SV=1;tr|A0A3Q3B0Q7|A0A3Q3B0Q7_CHICK Uncharacterized protein OS=Gallus gallus OX=9031 GN=NFYA PE=4 SV=1;tr|A0A3Q2UI11|A0A3Q2UI11_CHICK Uncharacterized protein OS=Gallus gal	NaN	22.3367	1	32.287	0.00085288	7.2014	10594000
A0A3Q2UIA2;F1NHH2	tr|A0A3Q2UIA2|A0A3Q2UIA2_CHICK Uncharacterized protein OS=Gallus gallus OX=9031 GN=LLGL1 PE=3 SV=1;tr|F1NHH2|F1NHH2_CHICK Uncharacterized protein OS=Gallus gallus OX=9031 GN=LLGL1 PE=3 SV=4	NaN	19.1035	1	109.24	0.00045537	8.2034	25911000
E1BWD5;A0A3Q2UIC0	tr|E1BWD5|E1BWD5_CHICK FERM domain-containing protein OS=Gallus gallus OX=9031 GN=EPB41L5 PE=4 SV=3;tr|A0A3Q2UIC0|A0A3Q2UIC0_CHICK FERM domain-containing protein OS=Gallus gallus OX=9031 GN=EPB41L5 PE=4 SV=1	NaN	21.021	2	57.376	0	14.708	51069000
Q04584;A0A3Q2UIH4	sp|Q04584|ZYX_CHICK Zyxin OS=Gallus gallus OX=9031 GN=ZYX PE=1 SV=1;tr|A0A3Q2UIH4|A0A3Q2UIH4_CHICK Zyxin OS=Gallus gallus OX=9031 GN=ZYX PE=4 SV=1	NaN	22.5646	2	58.537	0	18.98	136470000
A0A3Q2UII1;Q9W770	tr|A0A3Q2UII1|A0A3Q2UII1_CHICK F-spondin OS=Gallus gallus OX=9031 GN=SPON1 PE=4 SV=1;sp|Q9W770|SPON1_CHICK Spondin-1 OS=Gallus gallus OX=9031 GN=SPON1 PE=2 SV=1	NaN	17.5436	1	87.742	0.0023622	6.2437	6877800
A0A3Q2UIK2	tr|A0A3Q2UIK2|A0A3Q2UIK2_CHICK Endo/exonuclease/phosphatase domain-containing protein OS=Gallus gallus OX=9031 GN=PDE12 PE=4 SV=1	NaN	21.9549	6	64.44	0	82.455	105700000
A0A3Q2UIZ8	tr|A0A3Q2UIZ8|A0A3Q2UIZ8_CHICK Uncharacterized protein OS=Gallus gallus OX=9031 PE=4 SV=1	NaN	18.5679	1	24.864	0.0023847	6.3192	5828800
F1NTC8;A0A3Q2UJ04;A0A1D5P8X3;A0A3Q2U6G6	tr|F1NTC8|F1NTC8_CHICK Uncharacterized protein OS=Gallus gallus OX=9031 GN=PDLIM5 PE=4 SV=1;tr|A0A3Q2UJ04|A0A3Q2UJ04_CHICK Uncharacterized protein OS=Gallus gallus OX=9031 GN=PDLIM5 PE=4 SV=1;tr|A0A1D5P8X3|A0A1D5P8X3_CHICK PDZ domain-containing protein OS=	NaN	20.1531	3	64.091	0	138.68	40810000
A0A3Q2UJM6;F1N872	tr|A0A3Q2UJM6|A0A3Q2UJM6_CHICK Malectin domain-containing protein OS=Gallus gallus OX=9031 GN=MLEC PE=3 SV=1;tr|F1N872|F1N872_CHICK Malectin domain-containing protein OS=Gallus gallus OX=9031 GN=MLEC PE=3 SV=3	NaN	23.6336	4	27.708	0	133.9	234260000
E1C8Z9;A0A3Q2ULI9	tr|E1C8Z9|E1C8Z9_CHICK PID domain-containing protein OS=Gallus gallus OX=9031 GN=DAB2 PE=4 SV=5;tr|A0A3Q2ULI9|A0A3Q2ULI9_CHICK DAB adaptor protein 2 OS=Gallus gallus OX=9031 GN=DAB2 PE=4 SV=1	NaN	19.1008	2	76.862	0	19.876	15742000
A0A3Q2ULN8;E1BQG1	tr|A0A3Q2ULN8|A0A3Q2ULN8_CHICK Uncharacterized protein OS=Gallus gallus OX=9031 GN=TNRC6B PE=3 SV=1;tr|E1BQG1|E1BQG1_CHICK Uncharacterized protein OS=Gallus gallus OX=9031 GN=TNRC6B PE=3 SV=5	NaN	15.4107	1	187.65	0.00085215	7.1782	3441200
F1P0K1;A0A3Q2UM65;A0A3Q2U2I5	tr|F1P0K1|F1P0K1_CHICK Rib_recp_KP_reg domain-containing protein OS=Gallus gallus OX=9031 GN=RRBP1 PE=4 SV=2;tr|A0A3Q2UM65|A0A3Q2UM65_CHICK Rib_recp_KP_reg domain-containing protein OS=Gallus gallus OX=9031 GN=RRBP1 PE=4 SV=1;tr|A0A3Q2U2I5|A0A3Q2U2I5_CHICK	NaN	23.431	11	111.97	0	313.85	588060000
Q5ZMN4;A0A3Q2UMK3	tr|Q5ZMN4|Q5ZMN4_CHICK UBR-type domain-containing protein OS=Gallus gallus OX=9031 GN=UBR7 PE=2 SV=1;tr|A0A3Q2UMK3|A0A3Q2UMK3_CHICK UBR-type domain-containing protein OS=Gallus gallus OX=9031 GN=UBR7 PE=4 SV=1	NaN	17.8944	1	47.08	0.00044964	8.007	4629200
A0A3Q2UMT0;O12940	tr|A0A3Q2UMT0|A0A3Q2UMT0_CHICK Target of Myb protein 1 OS=Gallus gallus OX=9031 GN=TOM1 PE=3 SV=1;sp|O12940|TOM1_CHICK Target of Myb protein 1 OS=Gallus gallus OX=9031 GN=TOM1 PE=2 SV=2	NaN	16.0872	1	54.725	0.00045065	8.0334	1879700
A0A3Q3A2G8;E1BQR7;A0A3Q2UN22;A0A1D5PT87;A0A3Q2UM15	tr|A0A3Q3A2G8|A0A3Q3A2G8_CHICK Uncharacterized protein OS=Gallus gallus OX=9031 GN=ERC1 PE=4 SV=1;tr|E1BQR7|E1BQR7_CHICK FIP-RBD domain-containing protein OS=Gallus gallus OX=9031 GN=ERC1 PE=4 SV=2;tr|A0A3Q2UN22|A0A3Q2UN22_CHICK FIP-RBD domain-containing p	NaN	19.5847	3	117.3	0	18.73	41674000
Q5F464;A0A3Q2UP66	sp|Q5F464|LPP_CHICK Lipoma-preferred partner homolog OS=Gallus gallus OX=9031 GN=LPP PE=2 SV=1;tr|A0A3Q2UP66|A0A3Q2UP66_CHICK Lipoma-preferred partner homolog OS=Gallus gallus OX=9031 GN=LPP PE=4 SV=1	NaN	22.3969	5	65.139	0	71.673	154630000
F1NG43;A0A3Q2UPA9	tr|F1NG43|F1NG43_CHICK CMD domain-containing protein OS=Gallus gallus OX=9031 GN=LOC768709 PE=4 SV=5;tr|A0A3Q2UPA9|A0A3Q2UPA9_CHICK CMD domain-containing protein OS=Gallus gallus OX=9031 GN=LOC768709 PE=4 SV=1	NaN	19.9308	1	27.232	0.0038491	6.0454	14992000
A0A3Q3A497;A0A3Q3ASB1;A0A3Q3AQS5;F1NJ42	tr|A0A3Q3A497|A0A3Q3A497_CHICK RanBD1 domain-containing protein OS=Gallus gallus OX=9031 GN=RANBP3 PE=4 SV=1;tr|A0A3Q3ASB1|A0A3Q3ASB1_CHICK RanBD1 domain-containing protein OS=Gallus gallus OX=9031 GN=RANBP3 PE=4 SV=1;tr|A0A3Q3AQS5|A0A3Q3AQS5_CHICK RanBD1	NaN	22.1624	3	55.176	0	28.583	112660000
A0A3Q3A4D8;E1BRU3	tr|A0A3Q3A4D8|A0A3Q3A4D8_CHICK Uncharacterized protein OS=Gallus gallus OX=9031 GN=RBM23 PE=4 SV=1;tr|E1BRU3|E1BRU3_CHICK Uncharacterized protein OS=Gallus gallus OX=9031 GN=RBM23 PE=4 SV=4	NaN	22.5049	6	56.248	0	200.28	130940000
A0A3Q3A6G0	tr|A0A3Q3A6G0|A0A3Q3A6G0_CHICK Uncharacterized protein OS=Gallus gallus OX=9031 GN=NHLRC3 PE=4 SV=1	NaN	17.7697	1	55.124	0.0023613	6.2417	5586800
A0A3Q3A7M3;E1BRC1	tr|A0A3Q3A7M3|A0A3Q3A7M3_CHICK Uncharacterized protein OS=Gallus gallus OX=9031 GN=CD99 PE=3 SV=1;tr|E1BRC1|E1BRC1_CHICK Uncharacterized protein OS=Gallus gallus OX=9031 GN=CD99 PE=3 SV=2	NaN	20.928	1	18.269	0	50.26	11970000
A0A3Q3A7P6	tr|A0A3Q3A7P6|A0A3Q3A7P6_CHICK 40S ribosomal protein S15a OS=Gallus gallus OX=9031 GN=RPS15A PE=3 SV=1	NaN	27.4026	6	14.855	0	53.164	1419400000
F1NTD7;A0A3Q3A7Q4	tr|F1NTD7|F1NTD7_CHICK Uncharacterized protein OS=Gallus gallus OX=9031 GN=PTGFRN PE=4 SV=4;tr|A0A3Q3A7Q4|A0A3Q3A7Q4_CHICK Uncharacterized protein OS=Gallus gallus OX=9031 GN=PTGFRN PE=4 SV=1	NaN	19.9806	3	98.139	0	16.874	49663000
A0A3Q3A7Y5	tr|A0A3Q3A7Y5|A0A3Q3A7Y5_CHICK AP-2 complex subunit sigma OS=Gallus gallus OX=9031 GN=CLAPS2 PE=3 SV=1	NaN	22.9164	1	31.042	0.0081241	5.7232	63331000
A0A3Q3A8D7	tr|A0A3Q3A8D7|A0A3Q3A8D7_CHICK Uncharacterized protein OS=Gallus gallus OX=9031 GN=NDRG1 PE=3 SV=1	NaN	21.7783	2	44.218	0	23.72	50357000
A0A3Q3A8P1;E1C786	tr|A0A3Q3A8P1|A0A3Q3A8P1_CHICK Iron-sulfur cluster assembly 2 OS=Gallus gallus OX=9031 PE=3 SV=1;tr|E1C786|E1C786_CHICK Iron-sulfur cluster assembly 2 OS=Gallus gallus OX=9031 PE=4 SV=4	NaN	20.19	1	18.339	0.00045188	8.0661	14354000
A0A3Q3A8S0;F1P2S9	tr|A0A3Q3A8S0|A0A3Q3A8S0_CHICK Gamma-tubulin complex component OS=Gallus gallus OX=9031 GN=TUBGCP3 PE=3 SV=1;tr|F1P2S9|F1P2S9_CHICK Gamma-tubulin complex component OS=Gallus gallus OX=9031 GN=TUBGCP3 PE=3 SV=4	NaN	20.3106	3	86.065	0	16.788	49420000
E1C837;A0A3Q3A9H2	tr|E1C837|E1C837_CHICK WD_REPEATS_REGION domain-containing protein OS=Gallus gallus OX=9031 GN=STRN PE=4 SV=3;tr|A0A3Q3A9H2|A0A3Q3A9H2_CHICK WD_REPEATS_REGION domain-containing protein OS=Gallus gallus OX=9031 GN=STRN PE=4 SV=1	NaN	20.0855	2	85.073	0	12.081	35602000
A0A3Q3AA92	tr|A0A3Q3AA92|A0A3Q3AA92_CHICK Uncharacterized protein OS=Gallus gallus OX=9031 PE=4 SV=1	NaN	25.6065	2	4.5152	0	18.313	51088000
A0A3Q3AAY8	tr|A0A3Q3AAY8|A0A3Q3AAY8_CHICK Bin3-type SAM domain-containing protein OS=Gallus gallus OX=9031 GN=MEPCE PE=3 SV=1	NaN	18.3197	2	67.477	0	50.108	11778000
A0A3Q3ABJ5;Q5ZM91	tr|A0A3Q3ABJ5|A0A3Q3ABJ5_CHICK cAMP-dependent protein kinase type I-alpha regulatory subunit OS=Gallus gallus OX=9031 GN=PRKAR1A PE=3 SV=1;sp|Q5ZM91|KAP0_CHICK cAMP-dependent protein kinase type I-alpha regulatory subunit OS=Gallus gallus OX=9031 GN=PRKAR1	NaN	21.6895	2	41.437	0	38.433	60880000
F1NPT0;A0A3Q3ACH0;A0A3Q2UHM4	tr|F1NPT0|F1NPT0_CHICK Dynamin-1-like protein OS=Gallus gallus OX=9031 GN=DNM1L PE=3 SV=1;tr|A0A3Q3ACH0|A0A3Q3ACH0_CHICK Dynamin-1-like protein OS=Gallus gallus OX=9031 GN=DNM1L PE=3 SV=1;tr|A0A3Q2UHM4|A0A3Q2UHM4_CHICK Dynamin-1-like protein OS=Gallus gall	NaN	18.221	3	77.684	0	18.507	14666000
A0A3Q3ACK9	tr|A0A3Q3ACK9|A0A3Q3ACK9_CHICK Cyclin-T1 OS=Gallus gallus OX=9031 GN=CCNT1 PE=3 SV=1	NaN	20.1835	3	79.633	0	19.013	32153000
F1N903;A0A3Q3ACV0	tr|F1N903|F1N903_CHICK 26S proteasome non-ATPase regulatory subunit 6 OS=Gallus gallus OX=9031 GN=PSMD6 PE=3 SV=2;tr|A0A3Q3ACV0|A0A3Q3ACV0_CHICK 26S proteasome non-ATPase regulatory subunit 6 OS=Gallus gallus OX=9031 GN=PSMD6 PE=3 SV=1	NaN	25.4594	12	45.577	0	150.79	1153400000
A0A3Q3AE45;A0A1D5PN41;F1N9S2	tr|A0A3Q3AE45|A0A3Q3AE45_CHICK Maleylacetoacetate isomerase OS=Gallus gallus OX=9031 GN=GSTZ1 PE=3 SV=1;tr|A0A1D5PN41|A0A1D5PN41_CHICK Maleylacetoacetate isomerase OS=Gallus gallus OX=9031 GN=GSTZ1 PE=3 SV=2;tr|F1N9S2|F1N9S2_CHICK Uncharacterized protein O	NaN	22.5838	4	24.106	0	34.536	75440000
A0A3Q3AG75;A0A3Q2U3N4	tr|A0A3Q3AG75|A0A3Q3AG75_CHICK Glycine hydroxymethyltransferase OS=Gallus gallus OX=9031 PE=4 SV=1;tr|A0A3Q2U3N4|A0A3Q2U3N4_CHICK Glycine hydroxymethyltransferase OS=Gallus gallus OX=9031 PE=4 SV=1	NaN	25.9977	2	48.563	0	19.327	469000000
A0A3Q3AGE2	tr|A0A3Q3AGE2|A0A3Q3AGE2_CHICK Uncharacterized protein OS=Gallus gallus OX=9031 PE=4 SV=1	NaN	21.6399	2	17.301	0	12.957	32678000
A0A3Q3AGK3	tr|A0A3Q3AGK3|A0A3Q3AGK3_CHICK Ig-like domain-containing protein OS=Gallus gallus OX=9031 PE=4 SV=1	NaN	21.6738	1	10.261	0	10.862	13382000
F1P3U1;A0A3Q3AHD7	tr|F1P3U1|F1P3U1_CHICK MICOS complex subunit MIC60 OS=Gallus gallus OX=9031 GN=IMMT PE=3 SV=1;tr|A0A3Q3AHD7|A0A3Q3AHD7_CHICK MICOS complex subunit MIC60 OS=Gallus gallus OX=9031 GN=IMMT PE=3 SV=1	NaN	24.5833	9	79.223	0	132.15	1055700000
A0A3Q3AHG4;F1NSW3;A0A1D5PZB8	tr|A0A3Q3AHG4|A0A3Q3AHG4_CHICK Importin N-terminal domain-containing protein OS=Gallus gallus OX=9031 GN=TNPO1 PE=4 SV=1;tr|F1NSW3|F1NSW3_CHICK Importin N-terminal domain-containing protein OS=Gallus gallus OX=9031 GN=TNPO1 PE=4 SV=3;tr|A0A1D5PZB8|A0A1D5PZ	NaN	18.9309	3	101.99	0	18.248	21491000
F1NYU4;A0A3Q3AIE0	tr|F1NYU4|F1NYU4_CHICK Glutathione peroxidase OS=Gallus gallus OX=9031 GN=GPX4 PE=3 SV=3;tr|A0A3Q3AIE0|A0A3Q3AIE0_CHICK Glutathione peroxidase OS=Gallus gallus OX=9031 GN=GPX4 PE=3 SV=1	NaN	23.6684	4	19.345	0	30.228	146650000
A0A3Q3ALB3;A0A3S5ZPA9	tr|A0A3Q3ALB3|A0A3Q3ALB3_CHICK Mitogen-activated protein kinase OS=Gallus gallus OX=9031 GN=MAPK3 PE=3 SV=1;tr|A0A3S5ZPA9|A0A3S5ZPA9_CHICK Mitogen-activated protein kinase OS=Gallus gallus OX=9031 GN=MAPK3 PE=3 SV=1	NaN	20.8	2	40.416	0	13.148	38340000
A0A3Q3ALC8	tr|A0A3Q3ALC8|A0A3Q3ALC8_CHICK Uncharacterized protein OS=Gallus gallus OX=9031 PE=4 SV=1	NaN	19.7827	2	51.324	0	19.217	21647000
E1BRI5;A0A3Q3ALF0	tr|E1BRI5|E1BRI5_CHICK Abhydrolase_2 domain-containing protein OS=Gallus gallus OX=9031 GN=LYPLA2 PE=3 SV=1;tr|A0A3Q3ALF0|A0A3Q3ALF0_CHICK Abhydrolase_2 domain-containing protein OS=Gallus gallus OX=9031 GN=LYPLA2 PE=3 SV=1	NaN	23.3932	2	25.113	0	11.94	132210000
A0A3Q3ALP4	tr|A0A3Q3ALP4|A0A3Q3ALP4_CHICK Uncharacterized protein OS=Gallus gallus OX=9031 GN=IGBP1 PE=4 SV=1	NaN	22.0908	3	38.131	0	29.868	80405000
A0A3Q3AXS8;A0A3Q3AMU6	tr|A0A3Q3AXS8|A0A3Q3AXS8_CHICK 2-hydroxyacyl-CoA lyase 2 OS=Gallus gallus OX=9031 GN=ILVBL PE=3 SV=1;tr|A0A3Q3AMU6|A0A3Q3AMU6_CHICK 2-hydroxyacyl-CoA lyase 2 OS=Gallus gallus OX=9031 GN=ILVBL PE=3 SV=1	NaN	19.4539	2	70.886	0	15.017	20826000
E1BVT0;A0A3Q3AMW5	tr|E1BVT0|E1BVT0_CHICK Uncharacterized protein OS=Gallus gallus OX=9031 GN=RALB PE=3 SV=3;tr|A0A3Q3AMW5|A0A3Q3AMW5_CHICK Uncharacterized protein OS=Gallus gallus OX=9031 GN=RALB PE=3 SV=1	NaN	22.9452	1	23.348	0.00046533	9.0663	72683000
A0A3Q3AN52;F1NRP6	tr|A0A3Q3AN52|A0A3Q3AN52_CHICK Uncharacterized protein OS=Gallus gallus OX=9031 GN=FAM171A1 PE=3 SV=1;tr|F1NRP6|F1NRP6_CHICK Uncharacterized protein OS=Gallus gallus OX=9031 GN=FAM171A1 PE=3 SV=3	NaN	17.7495	1	98.867	0.0060883	5.9441	7712700
F1NCG5;A0A3Q3AN92	tr|F1NCG5|F1NCG5_CHICK Uncharacterized protein OS=Gallus gallus OX=9031 GN=LRRFIP1 PE=3 SV=4;tr|A0A3Q3AN92|A0A3Q3AN92_CHICK Uncharacterized protein OS=Gallus gallus OX=9031 GN=LRRFIP1 PE=3 SV=1	NaN	18.7802	1	76.908	0	12.712	15307000
A0A3Q3AP00	tr|A0A3Q3AP00|A0A3Q3AP00_CHICK Uncharacterized protein OS=Gallus gallus OX=9031 GN=PTPN12 PE=4 SV=1	NaN	19.3124	3	111.91	0	19.491	37109000
F1NMD8;Q5ZMK8;A0A3Q3APG2	tr|F1NMD8|F1NMD8_CHICK Uncharacterized protein OS=Gallus gallus OX=9031 GN=SGPL1 PE=3 SV=3;tr|Q5ZMK8|Q5ZMK8_CHICK Uncharacterized protein OS=Gallus gallus OX=9031 GN=SGPL1 PE=2 SV=1;tr|A0A3Q3APG2|A0A3Q3APG2_CHICK Uncharacterized protein OS=Gallus gallus OX	NaN	22.4581	4	61.053	0	46.023	161340000
A0A3Q3APV9;E1BTZ4	tr|A0A3Q3APV9|A0A3Q3APV9_CHICK Uncharacterized protein OS=Gallus gallus OX=9031 GN=TMEM214 PE=3 SV=1;tr|E1BTZ4|E1BTZ4_CHICK Uncharacterized protein OS=Gallus gallus OX=9031 GN=TMEM214 PE=3 SV=4	NaN	19.9913	4	66.982	0	36.542	40648000
A0A3Q3AQ98	tr|A0A3Q3AQ98|A0A3Q3AQ98_CHICK Ribosomal RNA-processing protein 8 OS=Gallus gallus OX=9031 GN=RRP8 PE=3 SV=1	NaN	18.6045	1	15.203	0	11.877	1992900
A0A3Q3AQH7;A0A3Q3AUJ9	tr|A0A3Q3AQH7|A0A3Q3AQH7_CHICK Uncharacterized protein OS=Gallus gallus OX=9031 GN=LOC107049542 PE=4 SV=1;tr|A0A3Q3AUJ9|A0A3Q3AUJ9_CHICK Uncharacterized protein OS=Gallus gallus OX=9031 GN=LOC107049542 PE=4 SV=1	NaN	22.5151	2	31.754	0	16.905	125870000
A0A3Q3AR14	tr|A0A3Q3AR14|A0A3Q3AR14_CHICK Uncharacterized protein OS=Gallus gallus OX=9031 GN=SMUG1 PE=3 SV=1	NaN	18.7196	2	35.961	0	13.084	9928500
A0A3Q3B2I1;F1NN26;A0A3Q3ARS2	tr|A0A3Q3B2I1|A0A3Q3B2I1_CHICK WD_REPEATS_REGION domain-containing protein OS=Gallus gallus OX=9031 GN=TSSC1 PE=3 SV=1;tr|F1NN26|F1NN26_CHICK WD_REPEATS_REGION domain-containing protein OS=Gallus gallus OX=9031 GN=TSSC1 PE=3 SV=1;tr|A0A3Q3ARS2|A0A3Q3ARS2_C	NaN	20.6251	1	40.391	0.00084638	7.0977	25875000
A0A3Q3AUG8	tr|A0A3Q3AUG8|A0A3Q3AUG8_CHICK Uncharacterized protein OS=Gallus gallus OX=9031 GN=LOC107050717 PE=3 SV=1	NaN	26.3268	3	19.493	0	43.942	673370000
A0A3Q3AV17	tr|A0A3Q3AV17|A0A3Q3AV17_CHICK Enoyl-CoA hydratase OS=Gallus gallus OX=9031 GN=EHHADH PE=3 SV=1	NaN	18.3623	2	79.663	0	11.392	14154000
A0A3Q3AXB0;A0A3Q2UHB2	tr|A0A3Q3AXB0|A0A3Q3AXB0_CHICK EF_TS domain-containing protein OS=Gallus gallus OX=9031 GN=TSFM PE=4 SV=1;tr|A0A3Q2UHB2|A0A3Q2UHB2_CHICK EF_TS domain-containing protein OS=Gallus gallus OX=9031 GN=TSFM PE=4 SV=1	NaN	25.6704	5	39.673	0	75.193	694210000
A0A3S5ZP92;A0A3Q3AZ50;Q5ZL27	tr|A0A3S5ZP92|A0A3S5ZP92_CHICK Uncharacterized protein OS=Gallus gallus OX=9031 GN=LSM14A PE=3 SV=1;tr|A0A3Q3AZ50|A0A3Q3AZ50_CHICK Uncharacterized protein OS=Gallus gallus OX=9031 GN=LSM14A PE=3 SV=1;tr|Q5ZL27|Q5ZL27_CHICK mRNA processing body assembly fac	NaN	22.4521	3	46.296	0	18.716	97548000
A0A3Q3AZJ6;Q5ZLU8	tr|A0A3Q3AZJ6|A0A3Q3AZJ6_CHICK RRM domain-containing protein OS=Gallus gallus OX=9031 GN=RBM3 PE=4 SV=1;tr|Q5ZLU8|Q5ZLU8_CHICK Cold-inducible RNA-binding protein OS=Gallus gallus OX=9031 GN=RBM3 PE=2 SV=1	NaN	27.6262	6	18.618	0	65.182	2071600000
A0A3Q3B0J0	tr|A0A3Q3B0J0|A0A3Q3B0J0_CHICK Uncharacterized protein OS=Gallus gallus OX=9031 PE=3 SV=1	NaN	20.7149	2	14.681	0	23.002	10327000
A0A3Q3B0X4	tr|A0A3Q3B0X4|A0A3Q3B0X4_CHICK EXPERA domain-containing protein OS=Gallus gallus OX=9031 GN=LOC100857622 PE=3 SV=1	NaN	25.0023	1	24.018	0	37.672	235250000
A0A3Q3B2M9;F1NAK4	tr|A0A3Q3B2M9|A0A3Q3B2M9_CHICK TOG domain-containing protein OS=Gallus gallus OX=9031 GN=GCN1 PE=3 SV=1;tr|F1NAK4|F1NAK4_CHICK TOG domain-containing protein OS=Gallus gallus OX=9031 GN=GCN1 PE=3 SV=4	NaN	17.1002	1	290.57	0.0049962	6.0247	23324000
A0A3S5ZP68;F6QJK6;A0A3S5ZPV2	tr|A0A3S5ZP68|A0A3S5ZP68_CHICK WH1 domain-containing protein OS=Gallus gallus OX=9031 GN=ENAH PE=3 SV=1;tr|F6QJK6|F6QJK6_CHICK WH1 domain-containing protein OS=Gallus gallus OX=9031 GN=ENAH PE=3 SV=3;tr|A0A3S5ZPV2|A0A3S5ZPV2_CHICK WH1 domain-containing pro	NaN	24.0309	5	57.154	0	201.13	377080000
A0A3S5ZP86	tr|A0A3S5ZP86|A0A3S5ZP86_CHICK Cytochrome b5 heme-binding domain-containing protein OS=Gallus gallus OX=9031 GN=FADS1 PE=3 SV=1	NaN	20.6791	3	59.075	0	19.107	40294000
A0A3S5ZP89	tr|A0A3S5ZP89|A0A3S5ZP89_CHICK Uncharacterized protein OS=Gallus gallus OX=9031 GN=SMARCA5 PE=3 SV=1	NaN	20.5047	4	120.59	0	31.588	78850000
A0A3S5ZPA4	tr|A0A3S5ZPA4|A0A3S5ZPA4_CHICK RRM domain-containing protein OS=Gallus gallus OX=9031 GN=SRSF11 PE=4 SV=1	NaN	19.6778	1	59.575	0.00046685	9.206	14258000
A0A3S5ZPB7	tr|A0A3S5ZPB7|A0A3S5ZPB7_CHICK Uncharacterized protein OS=Gallus gallus OX=9031 GN=SLC25A3 PE=3 SV=1	NaN	27.3229	7	39.901	0	82.357	3189900000
A0A3S5ZPJ0	tr|A0A3S5ZPJ0|A0A3S5ZPJ0_CHICK Serine/threonine-protein phosphatase OS=Gallus gallus OX=9031 GN=PPP6C PE=3 SV=1	NaN	18.846	1	62.241	0.002381	6.3017	13665000
A0A3S5ZPL2;Q8AWB8	tr|A0A3S5ZPL2|A0A3S5ZPL2_CHICK Structural maintenance of chromosomes protein OS=Gallus gallus OX=9031 GN=SMC3 PE=3 SV=1;tr|Q8AWB8|Q8AWB8_CHICK Structural maintenance of chromosomes protein OS=Gallus gallus OX=9031 GN=SMC3 PE=2 SV=1	NaN	18.7645	2	137.49	0	14.31	28055000
A0A3S5ZPL8	tr|A0A3S5ZPL8|A0A3S5ZPL8_CHICK Uncharacterized protein OS=Gallus gallus OX=9031 GN=SPATS2L PE=3 SV=1	NaN	19.6719	1	61.591	0	29.74	26729000
A0A3S5ZPN3	tr|A0A3S5ZPN3|A0A3S5ZPN3_CHICK DEAD box protein 5 OS=Gallus gallus OX=9031 GN=DDX5 PE=3 SV=1	NaN	26.2247	14	67.673	0	288.47	2431000000
A0A452J7Q6;Q8AXV0	tr|A0A452J7Q6|A0A452J7Q6_CHICK Endophilin-A2 OS=Gallus gallus OX=9031 GN=SH3GL1 PE=3 SV=1;sp|Q8AXV0|SH3G1_CHICK Endophilin-A2 OS=Gallus gallus OX=9031 GN=SH3GL1 PE=1 SV=1	NaN	22.7676	3	52.856	0	29.53	171370000
A0A452J7Q7;Q5ZLC9	tr|A0A452J7Q7|A0A452J7Q7_CHICK Golgin subfamily A member 7 OS=Gallus gallus OX=9031 GN=GOLGA7 PE=4 SV=1;sp|Q5ZLC9|GOGA7_CHICK Golgin subfamily A member 7 OS=Gallus gallus OX=9031 GN=GOLGA7 PE=2 SV=1	NaN	18.3653	1	15.691	0.00045269	8.083	3039100
Q5ZME2;A0A452J7S4;A0A1D5PE17	sp|Q5ZME2|MDHC_CHICK Malate dehydrogenase, cytoplasmic OS=Gallus gallus OX=9031 GN=MDH1 PE=2 SV=1;tr|A0A452J7S4|A0A452J7S4_CHICK Cytosolic malate dehydrogenase OS=Gallus gallus OX=9031 GN=MDH1 PE=3 SV=1;tr|A0A1D5PE17|A0A1D5PE17_CHICK Cytosolic malate dehyd	NaN	25.7222	7	36.543	0	138.76	830310000
Q5ZMP6;A0A452J7T4	sp|Q5ZMP6|AP2M1_CHICK AP-2 complex subunit mu OS=Gallus gallus OX=9031 GN=AP2M1 PE=2 SV=1;tr|A0A452J7T4|A0A452J7T4_CHICK AP-2 complex subunit mu OS=Gallus gallus OX=9031 GN=AP2M1 PE=3 SV=1	NaN	21.8275	4	49.389	0	30.298	96764000
A0A452J7V2;Q90965	tr|A0A452J7V2|A0A452J7V2_CHICK Ras-related protein Rab-2A OS=Gallus gallus OX=9031 GN=RAB2A PE=4 SV=1;sp|Q90965|RAB2A_CHICK Ras-related protein Rab-2A OS=Gallus gallus OX=9031 GN=RAB2A PE=2 SV=1	NaN	24.2386	7	22.651	0	164	277130000
P61355;A0A452J7V8	sp|P61355|RL27_CHICK 60S ribosomal protein L27 OS=Gallus gallus OX=9031 GN=RPL27 PE=2 SV=2;tr|A0A452J7V8|A0A452J7V8_CHICK 60S ribosomal protein L27 OS=Gallus gallus OX=9031 GN=RPL27 PE=3 SV=1	NaN	28.0428	6	15.798	0	39.012	1659100000
A0A452J7W6;P05625	tr|A0A452J7W6|A0A452J7W6_CHICK Non-specific serine/threonine protein kinase OS=Gallus gallus OX=9031 GN=RAF1 PE=3 SV=1;sp|P05625|RAF1_CHICK RAF proto-oncogene serine/threonine-protein kinase OS=Gallus gallus OX=9031 GN=RAF1 PE=2 SV=1	NaN	18.3987	1	71.857	0.00883	5.6921	12441000
Q5ZK10;A0A452J7Z5	sp|Q5ZK10|NSF1C_CHICK NSFL1 cofactor p47 OS=Gallus gallus OX=9031 GN=NSFL1C PE=2 SV=1;tr|A0A452J7Z5|A0A452J7Z5_CHICK NSFL1 cofactor p47 OS=Gallus gallus OX=9031 GN=NSFL1C PE=4 SV=1	NaN	25.1859	11	40.64	0	323.31	839710000
A0A452J7Z9;Q5ZJ41	tr|A0A452J7Z9|A0A452J7Z9_CHICK RING-CH-type domain-containing protein OS=Gallus gallus OX=9031 GN=MARCH5 PE=4 SV=1;sp|Q5ZJ41|MARH5_CHICK E3 ubiquitin-protein ligase MARCHF5 OS=Gallus gallus OX=9031 GN=MARCHF5 PE=2 SV=1	NaN	20.6465	1	31.334	0.0038521	6.0557	22979000
A0A452J805	tr|A0A452J805|A0A452J805_CHICK Tropomyosin beta chain OS=Gallus gallus OX=9031 GN=TPM2 PE=3 SV=1	NaN	22.2123	2	37.741	0	15.636	87464000
Q5ZM25;A0A452J806	sp|Q5ZM25|OLA1_CHICK Obg-like ATPase 1 OS=Gallus gallus OX=9031 GN=OLA1 PE=2 SV=1;tr|A0A452J806|A0A452J806_CHICK Obg-like ATPase 1 OS=Gallus gallus OX=9031 GN=OLA1 PE=3 SV=1	NaN	23.1845	5	44.778	0	43.805	257400000
Q5ZLK1;A0A452J811	sp|Q5ZLK1|DCA13_CHICK DDB1- and CUL4-associated factor 13 OS=Gallus gallus OX=9031 GN=DCAF13 PE=2 SV=1;tr|A0A452J811|A0A452J811_CHICK DDB1- and CUL4-associated factor 13 OS=Gallus gallus OX=9031 GN=DCAF13 PE=3 SV=1	NaN	19.8992	2	51.428	0	12.782	23468000
A0A452J822;Q5F433	tr|A0A452J822|A0A452J822_CHICK PRA1 family protein OS=Gallus gallus OX=9031 GN=ARL6IP5 PE=3 SV=1;sp|Q5F433|PRAF3_CHICK PRA1 family protein 3 OS=Gallus gallus OX=9031 GN=ARL6IP5 PE=2 SV=1	NaN	22.1124	2	21.564	0	11.517	18136000
A0A452J842;O42254	tr|A0A452J842|A0A452J842_CHICK IGF-II mRNA-binding protein 1 OS=Gallus gallus OX=9031 GN=IGF2BP1 PE=3 SV=1;sp|O42254|IF2B1_CHICK Insulin-like growth factor 2 mRNA-binding protein 1 OS=Gallus gallus OX=9031 GN=IGF2BP1 PE=1 SV=1	NaN	26.6346	20	63.17	0	323.31	3125600000
A0A452J855;Q9IAY5;A0A1L1RIX9	tr|A0A452J855|A0A452J855_CHICK Tudor-interacting repair regulator protein OS=Gallus gallus OX=9031 GN=NUDT16L1 PE=4 SV=1;sp|Q9IAY5|TIRR_CHICK Tudor-interacting repair regulator protein OS=Gallus gallus OX=9031 GN=NUDT16L1 PE=1 SV=3;tr|A0A1L1RIX9|A0A1L1RIX9	19.8049	23.3028	4	33.829	0	36.25	180220000
P08284;A0A452J861	sp|P08284|H101_CHICK Histone H1.01 OS=Gallus gallus OX=9031 PE=1 SV=2;tr|A0A452J861|A0A452J861_CHICK H15 domain-containing protein OS=Gallus gallus OX=9031 GN=HIST1H101 PE=3 SV=1	NaN	25.1808	1	22.044	0.0024096	6.4338	266240000
A0A452J884;Q5F359	tr|A0A452J884|A0A452J884_CHICK Trafficking protein particle complex subunit 5 OS=Gallus gallus OX=9031 GN=TRAPPC5 PE=3 SV=1;sp|Q5F359|TPPC5_CHICK Trafficking protein particle complex subunit 5 OS=Gallus gallus OX=9031 GN=TRAPPC5 PE=2 SV=1	NaN	21.4115	2	20.961	0.00047985	10.705	33472000
P21872;A0A547;A0A3Q2U3P5	sp|P21872|PUR2_CHICK Trifunctional purine biosynthetic protein adenosine-3 OS=Gallus gallus OX=9031 GN=GART PE=2 SV=1;tr|A0A547|A0A547_CHICK Trifunctional purine biosynthetic protein adenosine-3 OS=Gallus gallus OX=9031 GN=GART PE=3 SV=1;tr|A0A3Q2U3P5|A0A3	NaN	23.5186	12	106.54	0	159.78	660960000
Q5ZK28;A0A5H1ZRJ5	sp|Q5ZK28|DPOD3_CHICK DNA polymerase delta subunit 3 OS=Gallus gallus OX=9031 GN=POLD3 PE=1 SV=2;tr|A0A5H1ZRJ5|A0A5H1ZRJ5_CHICK DNA polymerase delta subunit 3 OS=Gallus gallus OX=9031 GN=POLD3 PE=4 SV=1	NaN	17.826	1	50.75	0.00082406	6.7307	5808900
Q90935;A0A5H1ZRK4	sp|Q90935|NEUS_CHICK Neuroserpin OS=Gallus gallus OX=9031 GN=SERPINI1 PE=1 SV=1;tr|A0A5H1ZRK4|A0A5H1ZRK4_CHICK Neuroserpin OS=Gallus gallus OX=9031 GN=SERPINI1 PE=3 SV=1	NaN	19.1429	1	46.529	0.00046642	9.1664	10420000
A0SVH2	tr|A0SVH2|A0SVH2_CHICK Receptor tyrosine kinase-like orphan receptor 2 OS=Gallus gallus OX=9031 GN=ROR2 PE=2 SV=1	NaN	21.7527	6	104.6	0	39.261	130740000
A1IMF0	tr|A1IMF0|A1IMF0_CHICK Ubiquitin carboxyl-terminal hydrolase OS=Gallus gallus OX=9031 GN=UCH-L1 PE=2 SV=1	NaN	25.1207	3	25.11	0	58.8	364820000
A2IAR9	tr|A2IAR9|A2IAR9_CHICK Cyclin dependent kinase 2 OS=Gallus gallus OX=9031 GN=CDK2 PE=2 SV=1	NaN	20.8998	2	33.732	0	14.201	37173000
Q07883;A3R0S3	sp|Q07883|GRB2_CHICK Growth factor receptor-bound protein 2 OS=Gallus gallus OX=9031 GN=GRB2 PE=1 SV=1;tr|A3R0S3|A3R0S3_CHICK Adapter protein GRB2 OS=Gallus gallus OX=9031 GN=GRB2 PE=2 SV=1	NaN	21.6544	3	25.076	0	18.72	46211000
A6NAB8	tr|A6NAB8|A6NAB8_CHICK Delta-6 fatty acid desaturase OS=Gallus gallus OX=9031 GN=FADS2 PE=2 SV=2	NaN	19.1717	1	51.99	0.0063958	5.8576	10630000
Q04678;B6ZLK1	sp|Q04678|SSRP1_CHICK FACT complex subunit SSRP1 OS=Gallus gallus OX=9031 GN=SSRP1 PE=2 SV=2;tr|B6ZLK1|B6ZLK1_CHICK FACT complex subunit SSRP1 OS=Gallus gallus OX=9031 GN=SSRP1 PE=2 SV=1	NaN	21.3287	3	80.025	0	70.135	81645000
D0EKR3;A0A3Q3AT29	tr|D0EKR3|D0EKR3_CHICK Peptidyl-prolyl cis-trans isomerase OS=Gallus gallus OX=9031 GN=PPIA PE=2 SV=1;tr|A0A3Q3AT29|A0A3Q3AT29_CHICK PPIase cyclophilin-type domain-containing protein OS=Gallus gallus OX=9031 GN=PPIA PE=4 SV=1	NaN	29.1143	12	17.81	0	201.75	6392400000
D2D3P4	tr|D2D3P4|D2D3P4_CHICK Small monomeric GTPase OS=Gallus gallus OX=9031 GN=Rab27a PE=2 SV=1	NaN	19.8917	1	25.066	0.00043011	7.2916	13618000
D2Z1L9	tr|D2Z1L9|D2Z1L9_CHICK LIM and SH3 domain protein 1 OS=Gallus gallus OX=9031 GN=LASP1 PE=2 SV=1	NaN	25.5755	6	29.655	0	131.12	750010000
D5LPR1	tr|D5LPR1|D5LPR1_CHICK Fascin OS=Gallus gallus OX=9031 GN=FSCN1 PE=2 SV=1	NaN	25.2446	14	54.171	0	251.65	1073300000
Q8UW59;D5M8S2	sp|Q8UW59|PARK7_CHICK Protein/nucleic acid deglycase DJ-1 OS=Gallus gallus OX=9031 GN=PARK7 PE=2 SV=1;tr|D5M8S2|D5M8S2_CHICK Maillard deglycase OS=Gallus gallus OX=9031 GN=DJ-1 PE=2 SV=1	NaN	23.368	4	19.943	0	25.219	129910000
E1BQ58	tr|E1BQ58|E1BQ58_CHICK RRF domain-containing protein OS=Gallus gallus OX=9031 GN=MRRFP1 PE=3 SV=1	NaN	22.3628	2	28.567	0	15.3	59329000
E1BQC2	tr|E1BQC2|E1BQC2_CHICK Ovotransferrin OS=Gallus gallus OX=9031 GN=TF PE=3 SV=4	22.7693	23.1689	2	83.489	0	53.261	762660000
E1BQF9	tr|E1BQF9|E1BQF9_CHICK Uncharacterized protein OS=Gallus gallus OX=9031 GN=CSDE1 PE=4 SV=3	NaN	24.7366	15	88.631	0	300.28	1230000000
E1BQI0	tr|E1BQI0|E1BQI0_CHICK Aminotran_1_2 domain-containing protein OS=Gallus gallus OX=9031 GN=SPTLC1 PE=4 SV=2	NaN	21.7092	3	53.325	0	22.931	65146000
E1BQM1	tr|E1BQM1|E1BQM1_CHICK Uncharacterized protein OS=Gallus gallus OX=9031 GN=CRELD2 PE=3 SV=3	NaN	22.054	1	39.497	0	70.121	95796000
E1BQN0	tr|E1BQN0|E1BQN0_CHICK zf-CHCC domain-containing protein OS=Gallus gallus OX=9031 GN=NDUFS6 PE=4 SV=2	NaN	22.7902	2	22.395	0	17.478	72532000
E1BQN9	tr|E1BQN9|E1BQN9_CHICK Calcyclin-binding protein OS=Gallus gallus OX=9031 GN=CACYBP PE=4 SV=1	NaN	24.1308	6	25.593	0	54.872	257170000
E1BQU2	tr|E1BQU2|E1BQU2_CHICK Phosphoacetylglucosamine mutase OS=Gallus gallus OX=9031 GN=PGM3 PE=3 SV=4	NaN	19.9391	1	59.899	0.00084388	7.0559	29151000
E1BQU4	tr|E1BQU4|E1BQU4_CHICK Vesicle-fusing ATPase OS=Gallus gallus OX=9031 GN=NSF PE=3 SV=2	NaN	22.4272	7	82.176	0	108.19	248150000
E1BQV4	tr|E1BQV4|E1BQV4_CHICK ER membrane protein complex subunit 3 OS=Gallus gallus OX=9031 GN=EMC3 PE=3 SV=1	NaN	21.2283	1	30.099	0	45.296	31938000
E1BQX4	tr|E1BQX4|E1BQX4_CHICK Secretory carrier-associated membrane protein OS=Gallus gallus OX=9031 GN=SCAMP4 PE=3 SV=1	NaN	21.4743	1	26.104	0.0067466	5.8304	14568000
P21265;E1BR00	sp|P21265|PUR8_CHICK Adenylosuccinate lyase OS=Gallus gallus OX=9031 GN=ADSL PE=2 SV=2;tr|E1BR00|E1BR00_CHICK Adenylosuccinate lyase OS=Gallus gallus OX=9031 GN=ADSL PE=3 SV=2	NaN	22.2115	4	54.652	0	60.39	121420000
E1BR08;A0A1L1RX25	tr|E1BR08|E1BR08_CHICK Core histone macro-H2A OS=Gallus gallus OX=9031 GN=H2AFY2 PE=4 SV=3;tr|A0A1L1RX25|A0A1L1RX25_CHICK Histone H2A OS=Gallus gallus OX=9031 PE=3 SV=2	NaN	21.1417	2	40.244	0	13.968	43959000
E1BR29	tr|E1BR29|E1BR29_CHICK Mitochondrial import inner membrane translocase subunit TIM23 OS=Gallus gallus OX=9031 GN=TIMM23B PE=3 SV=2	NaN	23.0149	2	21.701	0	45.565	67806000
E1BR36	tr|E1BR36|E1BR36_CHICK Uncharacterized protein OS=Gallus gallus OX=9031 GN=ACTL6A PE=3 SV=2	NaN	20.5302	2	47.484	0	11.079	30286000
E1BRA6	tr|E1BRA6|E1BRA6_CHICK DnaJ homolog subfamily C member 10 OS=Gallus gallus OX=9031 GN=DNAJC10 PE=4 SV=2	NaN	22.5858	7	91.494	0	48.631	264390000
E1BRE2	sp|E1BRE2|SIR5_CHICK NAD-dependent protein deacylase sirtuin-5, mitochondrial OS=Gallus gallus OX=9031 GN=SIRT5 PE=3 SV=1	NaN	20.0956	1	33.956	0.00042937	7.2868	21287000
E1BRH0	tr|E1BRH0|E1BRH0_CHICK CDK5 regulatory subunit-associated protein 1-like 1 OS=Gallus gallus OX=9031 GN=CDKAL1 PE=3 SV=2	NaN	19.2857	2	65.681	0	12.007	19173000
E1BRL4	tr|E1BRL4|E1BRL4_CHICK Synaptosomal-associated protein OS=Gallus gallus OX=9031 GN=SNAP23 PE=3 SV=1	NaN	23.4676	3	23.603	0	34.5	150800000
E1BRQ9	tr|E1BRQ9|E1BRQ9_CHICK TFIIS N-terminal domain-containing protein OS=Gallus gallus OX=9031 GN=IWS1 PE=4 SV=2	NaN	17.6595	1	77.804	0.00043197	7.3331	7245900
E1BRT9	tr|E1BRT9|E1BRT9_CHICK Complex I subunit B13 OS=Gallus gallus OX=9031 GN=NDUFA5 PE=3 SV=1	NaN	21.1478	1	13.448	0.00082372	6.7287	13941000
E1BRU0	tr|E1BRU0|E1BRU0_CHICK Uncharacterized protein OS=Gallus gallus OX=9031 GN=MAD1L1 PE=3 SV=4	NaN	20.8487	4	83.927	0	54.796	81196000
E1BRU9	tr|E1BRU9|E1BRU9_CHICK Carn_acyltransf domain-containing protein OS=Gallus gallus OX=9031 GN=CROT PE=3 SV=3	NaN	21.6759	3	70.06	0	18.03	107210000
E1BRV2	tr|E1BRV2|E1BRV2_CHICK Uncharacterized protein OS=Gallus gallus OX=9031 GN=MRPL20 PE=3 SV=1	NaN	21.8638	1	17.648	0.00043535	7.4715	30532000
E1BRV6	tr|E1BRV6|E1BRV6_CHICK Uncharacterized protein OS=Gallus gallus OX=9031 GN=SLC1A4 PE=4 SV=3	NaN	16.7857	1	55.685	0.0024029	6.4017	2372500
E1BRV8	tr|E1BRV8|E1BRV8_CHICK D-aminoacyl-tRNA deacylase OS=Gallus gallus OX=9031 GN=DTD1 PE=3 SV=1	NaN	19.8998	1	23.251	0.00045998	8.5327	8804200
E1BS06	tr|E1BS06|E1BS06_CHICK Ribosomal_L23eN domain-containing protein OS=Gallus gallus OX=9031 GN=RPL23A PE=3 SV=2	NaN	28.8982	4	17.656	0	56.704	2501500000
E1BS15	tr|E1BS15|E1BS15_CHICK Uncharacterized protein OS=Gallus gallus OX=9031 GN=ACSF2 PE=3 SV=3	NaN	23.5287	9	65.311	0	106.54	350950000
E1BS31	tr|E1BS31|E1BS31_CHICK Uncharacterized protein OS=Gallus gallus OX=9031 GN=MPP6 PE=3 SV=4	NaN	20.608	3	66.035	0	17.798	59134000
E1BS63	tr|E1BS63|E1BS63_CHICK Multidrug resistance protein 1 OS=Gallus gallus OX=9031 GN=ABCB1 PE=2 SV=4	NaN	20.8971	1	141.98	0.00083022	6.8236	128880000
E1BS82	tr|E1BS82|E1BS82_CHICK Uncharacterized protein OS=Gallus gallus OX=9031 GN=MRPS34 PE=4 SV=2	NaN	23.6356	6	25.098	0	40.581	195480000
E1BS97	tr|E1BS97|E1BS97_CHICK Non-specific serine/threonine protein kinase OS=Gallus gallus OX=9031 GN=PAK2 PE=4 SV=1	NaN	22.5124	4	57.545	0	167.63	149570000
E1BSA2	tr|E1BSA2|E1BSA2_CHICK Uncharacterized protein OS=Gallus gallus OX=9031 GN=EBNA1BP2 PE=3 SV=4	NaN	21.9703	2	55.979	0	28.131	90395000
E1BSA4	tr|E1BSA4|E1BSA4_CHICK Uncharacterized protein OS=Gallus gallus OX=9031 GN=PTTG1IP PE=4 SV=2	NaN	20.2528	1	21.187	0	27.742	8746100
E1BSA7	tr|E1BSA7|E1BSA7_CHICK Uncharacterized protein OS=Gallus gallus OX=9031 GN=SEC24A PE=3 SV=3	NaN	19.6028	3	120.02	0	68.191	31052000
E1BSE6	tr|E1BSE6|E1BSE6_CHICK RAP domain-containing protein OS=Gallus gallus OX=9031 GN=FASTKD2 PE=4 SV=2	NaN	20.9313	4	77.344	0	38.996	85982000
E1BSG7	tr|E1BSG7|E1BSG7_CHICK Uncharacterized protein OS=Gallus gallus OX=9031 GN=WBP11 PE=4 SV=3	NaN	21.5173	4	70.761	0	34.43	87043000
E1BSH7	tr|E1BSH7|E1BSH7_CHICK Dynamin-type G domain-containing protein OS=Gallus gallus OX=9031 GN=MFN2 PE=4 SV=2	NaN	18.4256	1	86.735	0	17.705	14084000
E1BSI4	tr|E1BSI4|E1BSI4_CHICK Uncharacterized protein OS=Gallus gallus OX=9031 GN=CHMP5 PE=3 SV=1	NaN	21.3567	2	24.602	0	16.892	16112000
E1BSI6	tr|E1BSI6|E1BSI6_CHICK L51_S25_CI-B8 domain-containing protein OS=Gallus gallus OX=9031 GN=MRPS25 PE=3 SV=3	NaN	23.9594	3	20.074	0	85.451	146810000
E1BSJ2	tr|E1BSJ2|E1BSJ2_CHICK 40S ribosomal protein S21 OS=Gallus gallus OX=9031 GN=RPS21 PE=3 SV=2	NaN	25.5189	4	9.1183	0	107.67	240400000
E1BSK2	tr|E1BSK2|E1BSK2_CHICK Vacuolar protein sorting-associated protein 18 homolog OS=Gallus gallus OX=9031 GN=VPS18 PE=3 SV=1	NaN	17.0135	1	112.57	0.00082919	6.8149	7011700
E1BSL7	tr|E1BSL7|E1BSL7_CHICK Thioredoxin domain-containing protein OS=Gallus gallus OX=9031 GN=ERP44 PE=4 SV=3	NaN	24.1098	5	46.976	0	150.19	362090000
E1BSM9	tr|E1BSM9|E1BSM9_CHICK CAP10 domain-containing protein OS=Gallus gallus OX=9031 GN=KDELC1 PE=3 SV=3	NaN	23.8126	7	57.894	0	69.874	456750000
E1BSN0	tr|E1BSN0|E1BSN0_CHICK Uncharacterized protein OS=Gallus gallus OX=9031 GN=SLC25A17 PE=3 SV=3	NaN	21.6325	1	37.242	0	11.031	48766000
E1BSN7	tr|E1BSN7|E1BSN7_CHICK Alpha-1,4 glucan phosphorylase OS=Gallus gallus OX=9031 GN=PYGB PE=3 SV=2	NaN	20.097	3	96.759	0	20.974	57195000
E1BSR5	tr|E1BSR5|E1BSR5_CHICK PWI domain-containing protein OS=Gallus gallus OX=9031 PE=4 SV=3	NaN	19.1362	1	41.138	0.00047214	9.602	9219100
E1BSR9	tr|E1BSR9|E1BSR9_CHICK RING-type domain-containing protein OS=Gallus gallus OX=9031 GN=RBX1 PE=3 SV=2	NaN	23.8776	1	12.274	0	17.328	46236000
E1BSS3	tr|E1BSS3|E1BSS3_CHICK Eukaryotic translation initiation factor 3 subunit A OS=Gallus gallus OX=9031 GN=EIF3A PE=3 SV=4	NaN	20.6982	7	164.38	0	55.439	93569000
E1BT18	tr|E1BT18|E1BT18_CHICK AMP-binding domain-containing protein OS=Gallus gallus OX=9031 GN=SLC27A4 PE=4 SV=4	NaN	20.274	3	89.291	0	47.02	48178000
E1BT66	tr|E1BT66|E1BT66_CHICK Uncharacterized protein OS=Gallus gallus OX=9031 GN=TAF15 PE=3 SV=2	NaN	19.4074	1	51.251	0	11.918	11126000
E1BT72	tr|E1BT72|E1BT72_CHICK Uncharacterized protein OS=Gallus gallus OX=9031 GN=NVL PE=4 SV=3	NaN	18.4242	1	94.954	0.0023781	6.2973	15126000
E1BT93	tr|E1BT93|E1BT93_CHICK Aldedh domain-containing protein OS=Gallus gallus OX=9031 GN=LOC107057078 PE=3 SV=3	NaN	25.8837	21	56.79	0	269.52	1733500000
E1BT94	tr|E1BT94|E1BT94_CHICK Complex I-B17 OS=Gallus gallus OX=9031 GN=NDUFB6 PE=3 SV=1	NaN	25.0671	3	14.917	0	20.222	316370000
Q5ZKX0;E1BTD5	tr|Q5ZKX0|Q5ZKX0_CHICK Dolichyl-diphosphooligosaccharide--protein glycotransferase OS=Gallus gallus OX=9031 GN=STT3B PE=2 SV=1;tr|E1BTD5|E1BTD5_CHICK Dolichyl-diphosphooligosaccharide--protein glycotransferase OS=Gallus gallus OX=9031 GN=STT3B PE=3 SV=3	NaN	20.4529	3	88.543	0	20.239	47365000
E1BTE0	tr|E1BTE0|E1BTE0_CHICK Uncharacterized protein OS=Gallus gallus OX=9031 GN=SSBP1 PE=3 SV=3	NaN	23.6237	2	17.232	0	33.625	103400000
E1BTG1	tr|E1BTG1|E1BTG1_CHICK 60S ribosomal protein L12 OS=Gallus gallus OX=9031 GN=RPL12 PE=3 SV=2	NaN	28.5776	6	17.737	0	101.5	3605300000
E1BTH9	tr|E1BTH9|E1BTH9_CHICK Uncharacterized protein OS=Gallus gallus OX=9031 GN=WASL PE=4 SV=4	NaN	20.9289	2	54.776	0	18.563	45914000
E1BTL0	tr|E1BTL0|E1BTL0_CHICK Transket_pyr domain-containing protein OS=Gallus gallus OX=9031 GN=OGDHL PE=3 SV=3	NaN	17.0698	1	114.68	0.0060675	5.9291	6190600
E1BTL3	tr|E1BTL3|E1BTL3_CHICK Uncharacterized protein OS=Gallus gallus OX=9031 GN=RDH11 PE=3 SV=2	NaN	23.5658	4	36.068	0	35.455	173840000
E1BTQ9	tr|E1BTQ9|E1BTQ9_CHICK Uncharacterized protein OS=Gallus gallus OX=9031 GN=AUH PE=3 SV=2	NaN	22.3435	3	34.284	0	18.051	95793000
E1BTS4	tr|E1BTS4|E1BTS4_CHICK Pre-mRNA-splicing factor SPF27 OS=Gallus gallus OX=9031 GN=BCAS2 PE=3 SV=3	20.5466	23.5258	4	25.934	0	33.973	190520000
E1BTT4	tr|E1BTT4|E1BTT4_CHICK Hydroxyacyl-CoA dehydrogenase trifunctional multienzyme complex subunit beta OS=Gallus gallus OX=9031 PE=3 SV=1	NaN	26.2835	14	50.849	0	159.14	1960300000
E1BTU3;A0A3Q2UB39	tr|E1BTU3|E1BTU3_CHICK OBG-type G domain-containing protein OS=Gallus gallus OX=9031 GN=GTPBP10 PE=4 SV=4;tr|A0A3Q2UB39|A0A3Q2UB39_CHICK OBG-type G domain-containing protein OS=Gallus gallus OX=9031 GN=GTPBP10 PE=4 SV=1	NaN	20.9547	5	48.525	0	32.239	56904000
Q5F4C4;F1NRN7;E1BU15	sp|Q5F4C4|SHOC2_CHICK Leucine-rich repeat protein SHOC-2 OS=Gallus gallus OX=9031 GN=SHOC2 PE=2 SV=1;tr|F1NRN7|F1NRN7_CHICK Leucine-rich repeat protein SHOC-2 OS=Gallus gallus OX=9031 GN=SHOC2 PE=4 SV=1;tr|E1BU15|E1BU15_CHICK Leucine-rich repeat protein SH	NaN	19.1874	1	59.162	0	23.704	13134000
E1BU27	tr|E1BU27|E1BU27_CHICK Aldo_ket_red domain-containing protein OS=Gallus gallus OX=9031 GN=AKR1D1 PE=3 SV=4	NaN	21.5761	3	49.535	0	37.82	78160000
E1BU66	tr|E1BU66|E1BU66_CHICK 60S ribosomal protein L38 OS=Gallus gallus OX=9031 GN=RPL38 PE=3 SV=3	NaN	25.1059	1	8.2178	0.00084998	7.1635	108330000
E1BUD0	tr|E1BUD0|E1BUD0_CHICK NADB-LER2 OS=Gallus gallus OX=9031 GN=LOC771069 PE=2 SV=3	NaN	21.5466	2	27.551	0	10.865	36758000
E1BUJ1	tr|E1BUJ1|E1BUJ1_CHICK G-patch domain-containing protein OS=Gallus gallus OX=9031 GN=RBM17 PE=4 SV=4	NaN	18.5053	1	44.8	0	118.83	8558100
E1BUJ8	tr|E1BUJ8|E1BUJ8_CHICK CHCH domain-containing protein OS=Gallus gallus OX=9031 GN=CHCHD4 PE=4 SV=1	NaN	22.6747	1	15.464	0.0023904	6.3494	33475000
E1BUN0	tr|E1BUN0|E1BUN0_CHICK Uncharacterized protein OS=Gallus gallus OX=9031 GN=HAPLN3 PE=4 SV=2	NaN	22.4695	4	41.001	0	28.621	121960000
E1BUP6	tr|E1BUP6|E1BUP6_CHICK Uncharacterized protein OS=Gallus gallus OX=9031 GN=PDIA5 PE=4 SV=4	NaN	22.8591	7	77.295	0	47.32	266280000
E1BUR1;A0A1L1RMX6	tr|E1BUR1|E1BUR1_CHICK CRIB domain-containing protein OS=Gallus gallus OX=9031 GN=CDC42EP4 PE=3 SV=1;tr|A0A1L1RMX6|A0A1L1RMX6_CHICK CRIB domain-containing protein OS=Gallus gallus OX=9031 GN=CDC42EP4 PE=3 SV=2	NaN	21.5853	2	32.297	0	15.027	59782000
E1BUS2	tr|E1BUS2|E1BUS2_CHICK Nop domain-containing protein OS=Gallus gallus OX=9031 GN=NOP58 PE=3 SV=4	NaN	23.1427	7	59.266	0	88.612	213000000
E1BUS4	tr|E1BUS4|E1BUS4_CHICK Nefa_Nip30_N domain-containing protein OS=Gallus gallus OX=9031 GN=FAM192A PE=4 SV=2	NaN	22.8332	3	28.7	0	107.76	89671000
E1BUX5	tr|E1BUX5|E1BUX5_CHICK t-SNARE coiled-coil homology domain-containing protein OS=Gallus gallus OX=9031 GN=VTI1B PE=3 SV=1	NaN	21.9088	2	26.807	0	13.866	55124000
E1BUZ7	tr|E1BUZ7|E1BUZ7_CHICK Uncharacterized protein OS=Gallus gallus OX=9031 GN=ATPAF2 PE=3 SV=2	NaN	20.3507	1	33	0.0091743	5.679	20057000
E1BV20	tr|E1BV20|E1BV20_CHICK Uncharacterized protein OS=Gallus gallus OX=9031 GN=PHF5A PE=3 SV=3	NaN	20.838	1	12.405	0.001226	6.6608	14995000
E1BV44	tr|E1BV44|E1BV44_CHICK Chromosome segregation 1-like protein OS=Gallus gallus OX=9031 GN=CSE1L PE=3 SV=2	NaN	26.7528	12	110.44	0	86.066	5880300000
E1BV45	tr|E1BV45|E1BV45_CHICK RRM domain-containing protein OS=Gallus gallus OX=9031 GN=RNPS1 PE=3 SV=4	NaN	21.7927	1	31.851	0	19.709	43596000
E1BV78	tr|E1BV78|E1BV78_CHICK Fibrinogen C-terminal domain-containing protein OS=Gallus gallus OX=9031 GN=FGG PE=4 SV=2	NaN	20.3439	3	49.954	0	29.567	33270000
E1BV94	tr|E1BV94|E1BV94_CHICK Female-lethal(2)D homolog OS=Gallus gallus OX=9031 GN=WTAP PE=3 SV=3	NaN	22.3369	4	44.36	0	61.236	111250000
E1BV97	tr|E1BV97|E1BV97_CHICK RPOLD domain-containing protein OS=Gallus gallus OX=9031 GN=POLR2C PE=3 SV=1	NaN	19.6792	2	31.389	0	17.717	11754000
E1BVB1	tr|E1BVB1|E1BVB1_CHICK Uncharacterized protein OS=Gallus gallus OX=9031 GN=RPL32 PE=3 SV=2	NaN	25.8607	4	15.916	0	27.492	426510000
E1BVC0	tr|E1BVC0|E1BVC0_CHICK Peroxisomal membrane protein PEX16 OS=Gallus gallus OX=9031 GN=PEX16 PE=3 SV=4	NaN	22.1612	2	28.005	0	28.597	70355000
E1BVD1	tr|E1BVD1|E1BVD1_CHICK Aldo_ket_red domain-containing protein OS=Gallus gallus OX=9031 GN=LOC418170 PE=3 SV=1	NaN	23.7267	3	35.663	0	32.535	277630000
E1BVE1	tr|E1BVE1|E1BVE1_CHICK Aurora/IPL1-related kinase 1 OS=Gallus gallus OX=9031 GN=AURKB PE=3 SV=1	NaN	20.5319	2	46.474	0	16.794	37901000
E1BVF8	tr|E1BVF8|E1BVF8_CHICK V-type proton ATPase subunit OS=Gallus gallus OX=9031 GN=ATP6V0D1 PE=3 SV=3	NaN	21.773	3	40.321	0	30.288	57337000
E1BVG7	tr|E1BVG7|E1BVG7_CHICK PNPLA domain-containing protein OS=Gallus gallus OX=9031 GN=PNPLA8 PE=4 SV=2	NaN	20.2118	2	90.697	0	10.926	46149000
E1BVM0	tr|E1BVM0|E1BVM0_CHICK Uncharacterized protein OS=Gallus gallus OX=9031 GN=TMEM199 PE=4 SV=1	NaN	20.4143	1	21.317	0.00043821	7.5499	12577000
E1BVM7	tr|E1BVM7|E1BVM7_CHICK Uncharacterized protein OS=Gallus gallus OX=9031 GN=CCDC134 PE=4 SV=2	NaN	21.1248	2	26.549	0	25.612	22867000
E1BVN1	tr|E1BVN1|E1BVN1_CHICK Uncharacterized protein OS=Gallus gallus OX=9031 GN=MTX2 PE=3 SV=3	NaN	22.7584	4	31.18	0	116.83	92239000
E1BVP8	tr|E1BVP8|E1BVP8_CHICK Nucleolar GTP-binding protein 2 OS=Gallus gallus OX=9031 GN=GNL2 PE=3 SV=2	NaN	19.0767	1	89.496	0.0049808	6.0113	22669000
E1BVT3	tr|E1BVT3|E1BVT3_CHICK Malate dehydrogenase OS=Gallus gallus OX=9031 GN=MDH2 PE=3 SV=3	NaN	28.3036	18	35.655	0	284.48	7288800000
E1BVT6	tr|E1BVT6|E1BVT6_CHICK Uncharacterized protein OS=Gallus gallus OX=9031 GN=ZNF512 PE=4 SV=2	NaN	18.3262	1	64.678	0.00084353	7.0528	9202200
E1BW15	tr|E1BW15|E1BW15_CHICK RNA helicase OS=Gallus gallus OX=9031 GN=DDX21 PE=3 SV=4	NaN	23.0704	10	75.196	0	79.93	343520000
E1BW27	tr|E1BW27|E1BW27_CHICK Uncharacterized protein OS=Gallus gallus OX=9031 GN=TMEM33 PE=3 SV=1	NaN	21.2215	1	28.275	0.006079	5.9402	26896000
E1BW50	tr|E1BW50|E1BW50_CHICK DUF1716 domain-containing protein OS=Gallus gallus OX=9031 GN=CTNNBL1 PE=4 SV=2	NaN	21.9562	5	65.153	0	76.958	105790000
E1BW94	tr|E1BW94|E1BW94_CHICK RRM domain-containing protein OS=Gallus gallus OX=9031 GN=SF3B6 PE=4 SV=2	NaN	19.1714	1	10.618	0.00082508	6.7758	3542500
E1BW99	tr|E1BW99|E1BW99_CHICK tRNA (adenine(58)-N(1))-methyltransferase OS=Gallus gallus OX=9031 GN=TRMT61B PE=4 SV=3	NaN	21.4343	3	47.642	0	27.805	59508000
E1BWA3;F1P0L9	tr|E1BWA3|E1BWA3_CHICK Protein kinase C OS=Gallus gallus OX=9031 GN=PRKCI PE=3 SV=3;tr|F1P0L9|F1P0L9_CHICK Protein kinase C OS=Gallus gallus OX=9031 GN=PRKCI PE=3 SV=3	NaN	21.2766	2	68.108	0	20.822	60971000
E1BWG6	tr|E1BWG6|E1BWG6_CHICK Uncharacterized protein OS=Gallus gallus OX=9031 GN=RCOR1 PE=4 SV=3	NaN	19.831	1	50.87	0	21.138	23317000
E1BWJ8	tr|E1BWJ8|E1BWJ8_CHICK Uncharacterized protein OS=Gallus gallus OX=9031 GN=ABI1 PE=3 SV=4	NaN	22.0311	2	54.893	0	17.508	81429000
E1BWM0	tr|E1BWM0|E1BWM0_CHICK TPR_REGION domain-containing protein OS=Gallus gallus OX=9031 GN=TTC1 PE=4 SV=1	NaN	20.9816	1	33.792	0.00043066	7.3111	35201000
E1BWS2	tr|E1BWS2|E1BWS2_CHICK Uncharacterized protein OS=Gallus gallus OX=9031 GN=NAPG PE=3 SV=1	NaN	22.9432	6	35.066	0	38.734	145170000
E1BWV6	tr|E1BWV6|E1BWV6_CHICK Uncharacterized protein OS=Gallus gallus OX=9031 GN=MRPL21 PE=4 SV=3	NaN	23.2366	3	21.347	0	24.958	128490000
E1BWX0	tr|E1BWX0|E1BWX0_CHICK rRNA adenine N(6)-methyltransferase OS=Gallus gallus OX=9031 GN=TFB1M PE=3 SV=3	NaN	19.466	2	39.909	0	12.356	16656000
E1BX01	tr|E1BX01|E1BX01_CHICK Protein MAK16 homolog OS=Gallus gallus OX=9031 GN=MAK16 PE=3 SV=1	NaN	17.8742	1	34.907	0.0060537	5.9078	2883100
E1BX02	tr|E1BX02|E1BX02_CHICK 26S proteasome non-ATPase regulatory subunit 2 OS=Gallus gallus OX=9031 GN=PSMD2 PE=3 SV=2	NaN	24.6322	13	100.01	0	162.85	1352200000
E1BX03;A0A1L1RSJ8;A0A1D5P0R0;A0A1L1RJU6	tr|E1BX03|E1BX03_CHICK Uncharacterized protein OS=Gallus gallus OX=9031 GN=FUBP1 PE=4 SV=4;tr|A0A1L1RSJ8|A0A1L1RSJ8_CHICK Uncharacterized protein OS=Gallus gallus OX=9031 GN=FUBP1 PE=4 SV=2;tr|A0A1D5P0R0|A0A1D5P0R0_CHICK Uncharacterized protein OS=Gallus g	21.8843	27.0757	23	67.428	0	323.31	4504900000
E1BX23	tr|E1BX23|E1BX23_CHICK Uncharacterized protein OS=Gallus gallus OX=9031 GN=GLT8D1 PE=4 SV=2	NaN	20.5919	3	42.343	0	18.142	33191000
E1BX57	tr|E1BX57|E1BX57_CHICK Uncharacterized protein OS=Gallus gallus OX=9031 GN=UBL7 PE=4 SV=1	NaN	19.6994	1	40.293	0	14.807	11919000
E1BX77;F1NA92	tr|E1BX77|E1BX77_CHICK Uncharacterized protein OS=Gallus gallus OX=9031 GN=CLPX PE=4 SV=3;tr|F1NA92|F1NA92_CHICK Uncharacterized protein OS=Gallus gallus OX=9031 GN=CLPX PE=4 SV=3	NaN	24.41	12	67.168	0	151.84	780220000
E1BX85	tr|E1BX85|E1BX85_CHICK Glutathione-dependent dehydroascorbate reductase OS=Gallus gallus OX=9031 GN=GSTO2 PE=3 SV=1	NaN	21.8649	1	27.223	0.0031189	6.147	72568000
E1BX97	tr|E1BX97|E1BX97_CHICK Uncharacterized protein OS=Gallus gallus OX=9031 GN=IGDCC3 PE=4 SV=5	NaN	19.5038	1	84.612	0	18.043	20815000
E1BXC2	tr|E1BXC2|E1BXC2_CHICK S-formylglutathione hydrolase OS=Gallus gallus OX=9031 GN=ESD PE=3 SV=3	NaN	22.9822	2	31.559	0	64.728	116000000
E1BXD0	tr|E1BXD0|E1BXD0_CHICK General transcription factor IIF subunit 2 OS=Gallus gallus OX=9031 GN=GTF2F2 PE=3 SV=3	NaN	20.7107	1	29.919	0.00047596	10.175	32605000
E1BXF4	tr|E1BXF4|E1BXF4_CHICK Uncharacterized protein OS=Gallus gallus OX=9031 GN=RCN1 PE=4 SV=3	NaN	22.1607	2	37.873	0	38.345	75018000
E1BXG0	tr|E1BXG0|E1BXG0_CHICK Peptidyl-prolyl cis-trans isomerase OS=Gallus gallus OX=9031 GN=PPIH PE=3 SV=1	NaN	21.3409	2	19.205	0	16.467	29218000
E1BXG9	tr|E1BXG9|E1BXG9_CHICK Uncharacterized protein OS=Gallus gallus OX=9031 GN=PPID PE=4 SV=2	NaN	23.725	6	40.478	0	97.862	291200000
E1BXI0	tr|E1BXI0|E1BXI0_CHICK Gamma-butyrobetaine hydroxylase OS=Gallus gallus OX=9031 GN=BBOX1 PE=3 SV=2	NaN	21.0828	3	49.425	0	16.16	53304000
E1BXI3	tr|E1BXI3|E1BXI3_CHICK Uncharacterized protein OS=Gallus gallus OX=9031 GN=PDCD5 PE=3 SV=1	NaN	22.8944	4	14.219	0	69.903	77964000
E1BXM5;O42273	tr|E1BXM5|E1BXM5_CHICK BPI2 domain-containing protein OS=Gallus gallus OX=9031 GN=BPIFB2 PE=4 SV=3;sp|O42273|TENP_CHICK Protein TENP OS=Gallus gallus OX=9031 GN=TENP PE=1 SV=1	22.3797	21.0917	3	47.317	0	31.445	130760000
E1BXP3	tr|E1BXP3|E1BXP3_CHICK Nucleolar protein 10 OS=Gallus gallus OX=9031 GN=NOL10 PE=3 SV=1	NaN	19.7562	1	80.423	0.00044014	7.5957	29224000
E1BXP4	tr|E1BXP4|E1BXP4_CHICK Ribonucleoside-diphosphate reductase OS=Gallus gallus OX=9031 GN=RRM2 PE=3 SV=2	NaN	23.634	3	44.439	0	50.929	260370000
E1BXR1	tr|E1BXR1|E1BXR1_CHICK Prefoldin subunit 3 OS=Gallus gallus OX=9031 GN=LOC772071 PE=3 SV=3	NaN	20.1371	1	18.737	0.00047259	9.6426	14990000
E1BXS1	tr|E1BXS1|E1BXS1_CHICK Uncharacterized protein OS=Gallus gallus OX=9031 GN=BCL2L13 PE=3 SV=3	NaN	22.2531	3	51.179	0	25.98	94971000
P50146;E1BXS2	sp|P50146|GNAI1_CHICK Guanine nucleotide-binding protein G(i) subunit alpha-1 OS=Gallus gallus OX=9031 GN=GNAI1 PE=2 SV=2;tr|E1BXS2|E1BXS2_CHICK Guanine nucleotide-binding protein G(i) subunit alpha-1 OS=Gallus gallus OX=9031 GN=GNAI1 PE=4 SV=2	NaN	22.5943	3	40.378	0	67.194	94985000
Q5ZMS6;E1BXW9	sp|Q5ZMS6|TDRD3_CHICK Tudor domain-containing protein 3 OS=Gallus gallus OX=9031 GN=TDRD3 PE=2 SV=1;tr|E1BXW9|E1BXW9_CHICK Tudor domain-containing protein 3 OS=Gallus gallus OX=9031 GN=TDRD3 PE=4 SV=2	NaN	19.8491	4	83.806	0	36.953	40611000
E1BY00	tr|E1BY00|E1BY00_CHICK Uncharacterized protein OS=Gallus gallus OX=9031 GN=SRSF5 PE=3 SV=2	NaN	21.5922	1	30.414	0.001217	6.5304	25293000
E1BY22	tr|E1BY22|E1BY22_CHICK Methylmalonyl-CoA isomerase OS=Gallus gallus OX=9031 GN=MUT PE=3 SV=1	NaN	22.0922	7	82.764	0	69.761	169900000
E1BY25	tr|E1BY25|E1BY25_CHICK Uncharacterized protein OS=Gallus gallus OX=9031 GN=WDR47 PE=4 SV=2	NaN	16.4601	1	101.99	0.0004329	7.3585	3606200
E1BY86	tr|E1BY86|E1BY86_CHICK Uncharacterized protein OS=Gallus gallus OX=9031 GN=FRG1BP PE=3 SV=3	NaN	19.5485	1	28.934	0.00045045	8.0326	9968800
E1BY89	tr|E1BY89|E1BY89_CHICK 60S ribosomal protein L23 OS=Gallus gallus OX=9031 GN=RPL23 PE=3 SV=2	NaN	27.5081	7	14.865	0	92.184	1718000000
E1BYA9;A0A1D5P1H5	tr|E1BYA9|E1BYA9_CHICK PPM-type phosphatase domain-containing protein OS=Gallus gallus OX=9031 GN=ILKAP PE=3 SV=2;tr|A0A1D5P1H5|A0A1D5P1H5_CHICK PPM-type phosphatase domain-containing protein OS=Gallus gallus OX=9031 GN=ILKAP PE=3 SV=2	NaN	21.1738	3	42.675	0	19.88	54408000
E1BYD2	tr|E1BYD2|E1BYD2_CHICK WD_REPEATS_REGION domain-containing protein OS=Gallus gallus OX=9031 GN=NUP37 PE=4 SV=1	NaN	21.303	2	36.949	0	26.966	46569000
E1BYF1	tr|E1BYF1|E1BYF1_CHICK Cystathionine gamma-lyase OS=Gallus gallus OX=9031 GN=CTH PE=3 SV=1	NaN	23.4835	4	43.898	0	54.039	293210000
E1BYG4;A0A3Q2UDX4	tr|E1BYG4|E1BYG4_CHICK Cystathionine beta-synthase OS=Gallus gallus OX=9031 GN=CBSL PE=3 SV=4;tr|A0A3Q2UDX4|A0A3Q2UDX4_CHICK Cystathionine beta-synthase OS=Gallus gallus OX=9031 GN=CBSL PE=3 SV=1	NaN	24.6	13	62.751	0	107.1	686610000
E1BYH2;Q9I9E0;A0A3Q2TRY2;F1N9U1	tr|E1BYH2|E1BYH2_CHICK Protein kinase domain-containing protein OS=Gallus gallus OX=9031 GN=TAOK1 PE=4 SV=1;sp|Q9I9E0|TAOK3_CHICK Serine/threonine-protein kinase TAO3 OS=Gallus gallus OX=9031 GN=TAOK3 PE=2 SV=2;tr|A0A3Q2TRY2|A0A3Q2TRY2_CHICK Serine/threoni	NaN	20.331	2	115.93	0	14.569	61995000
E1BYH8	tr|E1BYH8|E1BYH8_CHICK Cystathionine beta-synthase OS=Gallus gallus OX=9031 GN=LOC418544 PE=3 SV=3	NaN	19.5885	2	58.355	0	12.036	22862000
E1BYL1	tr|E1BYL1|E1BYL1_CHICK Uncharacterized protein OS=Gallus gallus OX=9031 PE=4 SV=3	NaN	23.2801	1	14.626	0.00046577	9.115	71299000
E1BYM1	tr|E1BYM1|E1BYM1_CHICK mRNA cap guanine-N7 methyltransferase OS=Gallus gallus OX=9031 GN=RNMT PE=3 SV=1	NaN	23.4089	9	47.54	0	142.85	222740000
E1BYQ3	tr|E1BYQ3|E1BYQ3_CHICK CULLIN_2 domain-containing protein OS=Gallus gallus OX=9031 GN=CUL3 PE=3 SV=3	NaN	18.5599	1	88.974	0	10.825	17003000
E1BYS6	tr|E1BYS6|E1BYS6_CHICK Protein kinase C OS=Gallus gallus OX=9031 GN=PKN2 PE=3 SV=3	NaN	19.6683	2	117.31	0	12.588	46660000
E1BYW9	tr|E1BYW9|E1BYW9_CHICK Proteasome subunit beta OS=Gallus gallus OX=9031 GN=PSMB3 PE=3 SV=1	NaN	25.0198	4	23.085	0	74.595	272130000
P02542;E1BZ05	sp|P02542|DESM_CHICK Desmin OS=Gallus gallus OX=9031 GN=DES PE=1 SV=1;tr|E1BZ05|E1BZ05_CHICK Desmin OS=Gallus gallus OX=9031 GN=DES PE=3 SV=4	NaN	19.7756	4	53.279	0	66.462	28722000
E1BZ56	tr|E1BZ56|E1BZ56_CHICK Proteasome assembly chaperone 2 OS=Gallus gallus OX=9031 GN=PSMG2 PE=3 SV=2	NaN	22.0913	4	30.328	0	21.938	71492000
E1BZ74	tr|E1BZ74|E1BZ74_CHICK AAA domain-containing protein OS=Gallus gallus OX=9031 GN=AFG3L2 PE=3 SV=3	NaN	22.795	9	89.39	0	67.349	349320000
E1BZ75	tr|E1BZ75|E1BZ75_CHICK U6 snRNA-associated Sm-like protein LSm8 OS=Gallus gallus OX=9031 GN=LSM8 PE=3 SV=3	NaN	21.658	1	10.431	0	33.298	23163000
E1BZ79	tr|E1BZ79|E1BZ79_CHICK Mevalonate kinase OS=Gallus gallus OX=9031 GN=MVK PE=3 SV=3	NaN	21.3096	3	41.882	0	25.542	41586000
E1BZH3	tr|E1BZH3|E1BZH3_CHICK PKS_ER domain-containing protein OS=Gallus gallus OX=9031 GN=VAT1L PE=4 SV=3	NaN	21.3478	3	41.69	0	19.699	48038000
E1BZH7	tr|E1BZH7|E1BZH7_CHICK Vacuolar-sorting protein SNF8 OS=Gallus gallus OX=9031 GN=SNF8 PE=3 SV=1	NaN	19.8183	1	28.885	0	12.276	8320400
E1BZM5	tr|E1BZM5|E1BZM5_CHICK Component of oligomeric Golgi complex 7 OS=Gallus gallus OX=9031 GN=COG7 PE=3 SV=1	NaN	18.0419	1	86.647	0.0057099	5.9518	10525000
E1BZP0	tr|E1BZP0|E1BZP0_CHICK Prolyl-tRNA synthetase OS=Gallus gallus OX=9031 GN=PARS2 PE=4 SV=4	NaN	19.7605	2	66.07	0	15.282	25757000
E1BZQ8	tr|E1BZQ8|E1BZQ8_CHICK Uncharacterized protein OS=Gallus gallus OX=9031 GN=SPACA9 PE=4 SV=3	NaN	20.8797	1	19.201	0.0095203	5.672	19294000
E1BZS2	tr|E1BZS2|E1BZS2_CHICK Uncharacterized protein OS=Gallus gallus OX=9031 GN=NAP1L1 PE=3 SV=1	NaN	26.7912	8	45.358	0	276.92	1625800000
E1C003	tr|E1C003|E1C003_CHICK Choline dehydrogenase OS=Gallus gallus OX=9031 GN=CHDH PE=3 SV=3	NaN	20.8965	3	79.966	0	27.003	78078000
E1C043	tr|E1C043|E1C043_CHICK Cytochrome c oxidase polypeptide Va OS=Gallus gallus OX=9031 GN=COX5A PE=3 SV=4	NaN	24.8291	2	15.968	0	16.516	298060000
E1C0C3	tr|E1C0C3|E1C0C3_CHICK J domain-containing protein OS=Gallus gallus OX=9031 GN=SEC63 PE=4 SV=2	NaN	21.1076	4	87.525	0	35.341	83605000
E1C0C4	tr|E1C0C4|E1C0C4_CHICK Peroxin-13 OS=Gallus gallus OX=9031 GN=PEX13 PE=3 SV=1	NaN	17.2494	1	43.638	0.0024116	6.4347	2648700
E1C0F1;A0A1L1RTY4	tr|E1C0F1|E1C0F1_CHICK Dolichyl-diphosphooligosaccharide--protein glycosyltransferase subunit 1 OS=Gallus gallus OX=9031 GN=RPN1 PE=3 SV=3;tr|A0A1L1RTY4|A0A1L1RTY4_CHICK Dolichyl-diphosphooligosaccharide--protein glycosyltransferase subunit 1 OS=Gallus gal	19.1322	25.6054	12	77	0	133.57	2219900000
E1C0F3	tr|E1C0F3|E1C0F3_CHICK Uncharacterized protein OS=Gallus gallus OX=9031 GN=RAB7A PE=4 SV=1	NaN	25.0737	6	23.548	0	136.58	494370000
E1C0J4	tr|E1C0J4|E1C0J4_CHICK Uncharacterized protein OS=Gallus gallus OX=9031 GN=UPF1 PE=3 SV=3	NaN	22.7251	9	123.4	0	96.946	395200000
E1C0K5	tr|E1C0K5|E1C0K5_CHICK Lactadherin OS=Gallus gallus OX=9031 GN=MFGE8 PE=4 SV=3	NaN	22.0579	4	53.146	0	52.388	109150000
E1C0P9;A0A1D5PGA3	tr|E1C0P9|E1C0P9_CHICK Uncharacterized protein OS=Gallus gallus OX=9031 GN=U2SURP PE=4 SV=4;tr|A0A1D5PGA3|A0A1D5PGA3_CHICK RRM domain-containing protein OS=Gallus gallus OX=9031 GN=U2SURP PE=4 SV=2	NaN	19.0815	2	120.63	0	13.625	22746000
E1C0Q5	tr|E1C0Q5|E1C0Q5_CHICK Uncharacterized protein OS=Gallus gallus OX=9031 GN=ACAT1 PE=3 SV=2	NaN	26.6811	15	44.09	0	323.31	2474900000
E1C0R9	tr|E1C0R9|E1C0R9_CHICK ER membrane protein complex subunit 7 OS=Gallus gallus OX=9031 GN=EMC7 PE=3 SV=2	NaN	23.1948	3	26.68	0	21.59	105610000
E1C0T1	tr|E1C0T1|E1C0T1_CHICK PB1 domain-containing protein OS=Gallus gallus OX=9031 GN=TFG PE=4 SV=1	NaN	23.2961	3	42.587	0	26.675	144210000
E1C0W7	tr|E1C0W7|E1C0W7_CHICK Uncharacterized protein OS=Gallus gallus OX=9031 GN=ERO1A PE=3 SV=2	NaN	20.0771	1	52.926	0	17.121	27651000
E1C0W9	tr|E1C0W9|E1C0W9_CHICK Uncharacterized protein OS=Gallus gallus OX=9031 GN=ABCB7 PE=4 SV=3	NaN	17.1319	1	75.147	0.0031177	6.1443	3877900
E1C123	tr|E1C123|E1C123_CHICK Aha1_N domain-containing protein OS=Gallus gallus OX=9031 GN=AHSA1 PE=3 SV=1	NaN	20.8831	2	38.045	0	19.344	40612000
E1C155	tr|E1C155|E1C155_CHICK Aldedh domain-containing protein OS=Gallus gallus OX=9031 GN=ALDH6A1 PE=3 SV=2	NaN	23.8745	10	54.969	0	191.73	399850000
E1C1D1	tr|E1C1D1|E1C1D1_CHICK Annexin OS=Gallus gallus OX=9031 GN=ANXA7 PE=3 SV=2	NaN	22.4235	5	49.333	0	31.6	135010000
E1C1G5	tr|E1C1G5|E1C1G5_CHICK Uncharacterized protein OS=Gallus gallus OX=9031 GN=ZC3H18 PE=4 SV=4	NaN	18.6293	1	101.36	0.002352	6.2026	17031000
E1C1K6	tr|E1C1K6|E1C1K6_CHICK Uncharacterized protein OS=Gallus gallus OX=9031 GN=RCL1 PE=3 SV=3	NaN	19.891	2	41.04	0	10.914	19445000
E1C1M8	tr|E1C1M8|E1C1M8_CHICK Syntaxin-18 OS=Gallus gallus OX=9031 GN=STX18 PE=3 SV=1	NaN	21.2946	2	38.387	0	52.085	51445000
E1C1N8	tr|E1C1N8|E1C1N8_CHICK Tudor domain-containing protein OS=Gallus gallus OX=9031 GN=AKAP1 PE=4 SV=3	NaN	17.1519	2	95.474	0	10.922	5097200
E1C1P9	tr|E1C1P9|E1C1P9_CHICK Uncharacterized protein OS=Gallus gallus OX=9031 GN=MRPS27 PE=4 SV=3	NaN	23.5446	6	46.74	0	64.66	269200000
E1C1Q0	tr|E1C1Q0|E1C1Q0_CHICK LIM zinc-binding domain-containing protein OS=Gallus gallus OX=9031 GN=LYAR PE=4 SV=4	NaN	22.3896	3	42.1	0	111.41	93406000
E1C1Q2	tr|E1C1Q2|E1C1Q2_CHICK Uncharacterized protein OS=Gallus gallus OX=9031 GN=MAP1B PE=4 SV=4	NaN	20.1697	4	269	0	65.618	115590000
E1C1R5	tr|E1C1R5|E1C1R5_CHICK PUM-HD domain-containing protein OS=Gallus gallus OX=9031 GN=PUM3 PE=4 SV=2	NaN	20.1493	2	73.009	0.00047687	10.44	39539000
E1C1V3	tr|E1C1V3|E1C1V3_CHICK Junction plakoglobin OS=Gallus gallus OX=9031 GN=JUP PE=2 SV=2	NaN	22.6649	9	82.125	0	75.134	312550000
E1C1X1	tr|E1C1X1|E1C1X1_CHICK Uncharacterized protein OS=Gallus gallus OX=9031 GN=TMEM126A PE=4 SV=3	NaN	23.9697	5	23.254	0	30.704	180700000
E1C1Y0	tr|E1C1Y0|E1C1Y0_CHICK RNA 3-terminal phosphate cyclase OS=Gallus gallus OX=9031 GN=RTCA PE=3 SV=4	NaN	22.4166	4	39.223	0	21.842	100770000
E1C1Y5	tr|E1C1Y5|E1C1Y5_CHICK Ribosomal_S10 domain-containing protein OS=Gallus gallus OX=9031 GN=MRPS10 PE=3 SV=2	NaN	18.8482	1	22.733	0.00047393	9.7764	5191300
E1C1Z9	tr|E1C1Z9|E1C1Z9_CHICK Uncharacterized protein OS=Gallus gallus OX=9031 GN=TMBIM4 PE=3 SV=1	NaN	21.707	1	26.677	0.00085397	7.2212	17117000
E1C229	tr|E1C229|E1C229_CHICK Arginyl-tRNA synthetase OS=Gallus gallus OX=9031 GN=RARS2 PE=3 SV=1	NaN	21.5484	5	65.342	0	29.514	113480000
E1C249	tr|E1C249|E1C249_CHICK Akirin OS=Gallus gallus OX=9031 GN=AKIRIN2 PE=2 SV=3	NaN	19.9289	1	21.582	0.0023585	6.2301	10980000
E1C266	tr|E1C266|E1C266_CHICK Tyrosine--tRNA ligase OS=Gallus gallus OX=9031 GN=YARS2 PE=3 SV=4	NaN	21.9307	4	53.54	0	28.157	103930000
E1C279	tr|E1C279|E1C279_CHICK 3Beta_HSD domain-containing protein OS=Gallus gallus OX=9031 GN=NSDHL PE=3 SV=1	NaN	20.8587	2	38.925	0	12.444	41833000
E1C281	tr|E1C281|E1C281_CHICK Uncharacterized protein OS=Gallus gallus OX=9031 GN=PHF6 PE=4 SV=2	NaN	20.2485	1	40.951	0.0088138	5.6832	26160000
E1C2C3	tr|E1C2C3|E1C2C3_CHICK SF3b1 domain-containing protein OS=Gallus gallus OX=9031 GN=SF3B1 PE=3 SV=3	NaN	21.0303	5	145.72	0	80.293	132780000
E1C2E9	tr|E1C2E9|E1C2E9_CHICK MRP-S23 domain-containing protein OS=Gallus gallus OX=9031 GN=MRPS23 PE=4 SV=3	NaN	22.5579	3	22.087	0	23.604	61745000
E1C2F2	tr|E1C2F2|E1C2F2_CHICK Pinin OS=Gallus gallus OX=9031 GN=PNN PE=3 SV=3	NaN	19.8039	1	78.126	0.00082305	6.7167	30206000
E1C2F4	tr|E1C2F4|E1C2F4_CHICK Uncharacterized protein OS=Gallus gallus OX=9031 GN=GATD3AL2 PE=4 SV=1	NaN	20.5256	1	24.231	0.00045558	8.2106	16604000
E1C2H4	tr|E1C2H4|E1C2H4_CHICK LEM domain-containing protein OS=Gallus gallus OX=9031 GN=LEMD2 PE=4 SV=4	NaN	21.6812	5	77.059	0	73.717	144600000
E1C2I3	tr|E1C2I3|E1C2I3_CHICK Uncharacterized protein OS=Gallus gallus OX=9031 GN=ERGIC1 PE=3 SV=3	NaN	24.3975	4	32.693	0	25.399	265190000
E1C2I9;A0A3Q2U2D0	tr|E1C2I9|E1C2I9_CHICK Leucyl-tRNA synthetase OS=Gallus gallus OX=9031 GN=LARS PE=3 SV=1;tr|A0A3Q2U2D0|A0A3Q2U2D0_CHICK Leucyl-tRNA synthetase OS=Gallus gallus OX=9031 GN=LARS PE=3 SV=1	NaN	19.6461	5	134.27	0	78.506	50049000
E1C2J7	tr|E1C2J7|E1C2J7_CHICK Uncharacterized protein OS=Gallus gallus OX=9031 GN=INTS4 PE=4 SV=3	NaN	17.4515	1	108.73	0	16.007	9858400
E1C2L5	tr|E1C2L5|E1C2L5_CHICK RRM domain-containing protein OS=Gallus gallus OX=9031 GN=ALYREF PE=4 SV=3	NaN	26.731	7	26.695	0	153.19	1336700000
E1C2P3	sp|E1C2P3|HSP7E_CHICK Heat shock 70 kDa protein 14 OS=Gallus gallus OX=9031 GN=HSPA14 PE=3 SV=1	NaN	20.0973	2	54.112	0	38.942	30287000
E1C2U4	tr|E1C2U4|E1C2U4_CHICK DNA helicase OS=Gallus gallus OX=9031 GN=MCM4 PE=3 SV=3	NaN	24.0542	19	96.883	0	171.57	888380000
E1C2Z5	tr|E1C2Z5|E1C2Z5_CHICK T1-TrpRS OS=Gallus gallus OX=9031 GN=WARS PE=3 SV=3	NaN	19.2595	2	53.696	0	86.048	16945000
E1C306	tr|E1C306|E1C306_CHICK Methyltransf_11 domain-containing protein OS=Gallus gallus OX=9031 GN=NDUFAF5 PE=4 SV=2	NaN	20.605	2	37.592	0	11.927	25518000
E1C310	tr|E1C310|E1C310_CHICK Endoplasmic reticulum transmembrane protein OS=Gallus gallus OX=9031 GN=BCAP29 PE=3 SV=1	NaN	21.5078	3	27.765	0	25.029	44727000
E1C319	tr|E1C319|E1C319_CHICK t-SNARE coiled-coil homology domain-containing protein OS=Gallus gallus OX=9031 GN=STX12 PE=3 SV=1	NaN	20.3547	2	30.797	0	14.842	17430000
E1C370	tr|E1C370|E1C370_CHICK Nucleoporin 43 OS=Gallus gallus OX=9031 PE=4 SV=3	NaN	22.5739	3	41.694	0	100.31	81164000
E1C396	tr|E1C396|E1C396_CHICK Hepatocyte growth factor-regulated tyrosine kinase substrate OS=Gallus gallus OX=9031 GN=HGS PE=4 SV=3	NaN	20.7835	2	84.367	0	23.906	45123000
E1C397	tr|E1C397|E1C397_CHICK Mab-21 domain-containing protein OS=Gallus gallus OX=9031 GN=MB21D2 PE=4 SV=3	NaN	18.6552	2	55.729	0	12.953	11972000
E1C3A1	tr|E1C3A1|E1C3A1_CHICK Kinesin-like protein OS=Gallus gallus OX=9031 GN=KIF5B PE=3 SV=1	NaN	21.9169	4	110.14	0	97.694	237560000
E1C3A9;P81021	tr|E1C3A9|E1C3A9_CHICK Vigilin OS=Gallus gallus OX=9031 GN=HDLBP PE=4 SV=1;sp|P81021|VIGLN_CHICK Vigilin OS=Gallus gallus OX=9031 GN=HDLBP PE=2 SV=1	NaN	17.952	1	141.6	0	20.489	16989000
E1C3C6	tr|E1C3C6|E1C3C6_CHICK V-type proton ATPase subunit G OS=Gallus gallus OX=9031 GN=ATP6V1G1 PE=3 SV=1	NaN	24.8597	5	13.552	0	143.8	182670000
E1C3D2	tr|E1C3D2|E1C3D2_CHICK Septin-type G domain-containing protein OS=Gallus gallus OX=9031 GN=SEPT2 PE=3 SV=3	NaN	25.946	8	41.638	0	257.66	1357500000
E1C3I1	tr|E1C3I1|E1C3I1_CHICK Uncharacterized protein OS=Gallus gallus OX=9031 GN=ZC3HC1 PE=4 SV=2	NaN	18.5633	1	53.228	0.00045228	8.0728	10458000
E1C3Q7	tr|E1C3Q7|E1C3Q7_CHICK Uncharacterized protein OS=Gallus gallus OX=9031 GN=RABIF PE=4 SV=5	NaN	20.9944	1	21.501	0.006739	5.8254	20890000
E1C3R1	tr|E1C3R1|E1C3R1_CHICK PCI domain-containing protein OS=Gallus gallus OX=9031 GN=COPS7B PE=3 SV=3	NaN	20.9587	1	44.841	1	-2	34644000
E1C3U1	tr|E1C3U1|E1C3U1_CHICK Protein DPCD OS=Gallus gallus OX=9031 GN=DPCD PE=3 SV=2	NaN	17.4895	1	23.965	0.0023557	6.2204	2576300
E1C3U6	tr|E1C3U6|E1C3U6_CHICK COP9 signalosome complex subunit 2 OS=Gallus gallus OX=9031 GN=COPS2 PE=3 SV=4	NaN	22.349	4	51.596	0	26.477	112190000
E1C420	tr|E1C420|E1C420_CHICK 3-hydroxy-3-methylglutaryl coenzyme A reductase OS=Gallus gallus OX=9031 GN=HMGCR PE=3 SV=3	NaN	18.7651	1	101.33	0.00046948	9.3828	20047000
F1P0B2;E1C440	tr|F1P0B2|F1P0B2_CHICK ABPP OS=Gallus gallus OX=9031 GN=APP PE=3 SV=3;tr|E1C440|E1C440_CHICK ABPP OS=Gallus gallus OX=9031 GN=APP PE=3 SV=3	NaN	18.4248	1	78.541	0.00042863	7.2776	10557000
E1C4B8	tr|E1C4B8|E1C4B8_CHICK Phosphomannomutase OS=Gallus gallus OX=9031 GN=PMM2 PE=3 SV=4	NaN	22.7194	3	28.282	0	16.532	110490000
E1C4G6	tr|E1C4G6|E1C4G6_CHICK Uncharacterized protein OS=Gallus gallus OX=9031 GN=CDKN2AIP PE=3 SV=5	NaN	20.7952	4	68.404	0	26.41	67325000
Q5ZI89;E1C4H1	sp|Q5ZI89|TPC11_CHICK Trafficking protein particle complex subunit 11 OS=Gallus gallus OX=9031 GN=TRAPPC11 PE=2 SV=1;tr|E1C4H1|E1C4H1_CHICK Trafficking protein particle complex subunit 11 OS=Gallus gallus OX=9031 GN=TRAPPC11 PE=3 SV=2	NaN	18.4425	1	128.55	0.00083998	7.0038	19238000
E1C4H6	tr|E1C4H6|E1C4H6_CHICK U6 snRNA-associated Sm-like protein LSm4 OS=Gallus gallus OX=9031 GN=LSM4 PE=3 SV=4	NaN	22.0135	2	15.341	0	11.476	38103000
E1C4L3	tr|E1C4L3|E1C4L3_CHICK Sepiapterin reductase OS=Gallus gallus OX=9031 GN=SPR PE=3 SV=1	NaN	17.3572	1	28.839	0.0023791	6.2989	2518400
E1C4M0	tr|E1C4M0|E1C4M0_CHICK 40S ribosomal protein S2 OS=Gallus gallus OX=9031 GN=RPS2 PE=3 SV=1	NaN	28.3495	12	30.673	0	165.23	6156300000
E1C4M6	tr|E1C4M6|E1C4M6_CHICK Ubiquitin carboxyl-terminal hydrolase OS=Gallus gallus OX=9031 GN=USP14 PE=3 SV=4	NaN	23.8767	5	52.671	0	98.6	323470000
E1C4N0	tr|E1C4N0|E1C4N0_CHICK S10_plectin domain-containing protein OS=Gallus gallus OX=9031 GN=RPS10 PE=3 SV=2	NaN	27.2749	8	18.91	0	122	1299100000
E1C4N5	tr|E1C4N5|E1C4N5_CHICK Dolichol-phosphate mannosyltransferase subunit 1 OS=Gallus gallus OX=9031 GN=DPM1 PE=3 SV=2	NaN	22.1692	3	27.195	0	21.896	66028000
E1C4Q0	tr|E1C4Q0|E1C4Q0_CHICK Ribonucleoside-diphosphate reductase OS=Gallus gallus OX=9031 GN=RRM1 PE=3 SV=2	NaN	23.0722	7	90.064	0	86.907	370410000
E1C4U7	tr|E1C4U7|E1C4U7_CHICK Complex I-B12 OS=Gallus gallus OX=9031 GN=NDUFB3 PE=3 SV=1	NaN	24.4616	2	11.154	0	21.779	138620000
E1C4W4	tr|E1C4W4|E1C4W4_CHICK Aldedh domain-containing protein OS=Gallus gallus OX=9031 GN=ALDH7A1 PE=3 SV=1	NaN	25.178	13	58.053	0	202.54	911030000
E1C4X4	tr|E1C4X4|E1C4X4_CHICK Transcription elongation factor SPT4 OS=Gallus gallus OX=9031 GN=SUPT4H1 PE=3 SV=3	NaN	21.4919	1	13.221	0.00044307	7.7125	17695000
E1C502	tr|E1C502|E1C502_CHICK Autophagy-related protein 3 OS=Gallus gallus OX=9031 GN=ATG3 PE=3 SV=1	NaN	22.6334	4	35.669	0	25.312	71571000
E1C516	tr|E1C516|E1C516_CHICK Pyridoxal phosphate homeostasis protein OS=Gallus gallus OX=9031 GN=PROSC PE=3 SV=2	NaN	19.8986	1	29.469	0.00046729	9.2323	16616000
E1C525	tr|E1C525|E1C525_CHICK HRDC domain-containing protein OS=Gallus gallus OX=9031 GN=EXOSC10 PE=4 SV=1	NaN	19.3395	3	103.9	0	34.432	37813000
E1C593	tr|E1C593|E1C593_CHICK Exportin-T OS=Gallus gallus OX=9031 GN=XPOT PE=3 SV=1	NaN	16.3073	1	109.82	0.0004363	7.4887	3405900
E1C5A3	tr|E1C5A3|E1C5A3_CHICK Serine/threonine protein phosphatase 2A regulatory subunit OS=Gallus gallus OX=9031 GN=PPP2R5A PE=3 SV=3	NaN	20.6157	3	55.284	0	19.666	38560000
E1C5C5;R4GG22	tr|E1C5C5|E1C5C5_CHICK Uncharacterized protein OS=Gallus gallus OX=9031 GN=SELENOS PE=3 SV=1;tr|R4GG22|R4GG22_CHICK Uncharacterized protein OS=Gallus gallus OX=9031 GN=SELENOS PE=3 SV=3	NaN	22.642	2	20.956	0	31.576	45818000
E1C5D2	tr|E1C5D2|E1C5D2_CHICK Complex I-15 kDa OS=Gallus gallus OX=9031 GN=NDUFS5 PE=3 SV=1	NaN	23.2898	1	12.651	0.00083333	6.8621	61528000
E1C5I8	tr|E1C5I8|E1C5I8_CHICK SAM_MT_RSMB_NOP domain-containing protein OS=Gallus gallus OX=9031 GN=NSUN5 PE=3 SV=3	NaN	18.7645	2	50.994	0	16.53	13360000
E1C5K0;F1NBG3	tr|E1C5K0|E1C5K0_CHICK WH1 domain-containing protein OS=Gallus gallus OX=9031 GN=HOMER3 PE=4 SV=3;tr|F1NBG3|F1NBG3_CHICK WH1 domain-containing protein OS=Gallus gallus OX=9031 GN=HOMER1 PE=4 SV=2	NaN	21.0233	2	40.017	0	18.988	46889000
E1C5L8	tr|E1C5L8|E1C5L8_CHICK Uncharacterized protein OS=Gallus gallus OX=9031 GN=MRPL44 PE=4 SV=1	NaN	20.6882	2	36.056	0	31.96	30412000
E1C5S0;A0A3Q2UL03	tr|E1C5S0|E1C5S0_CHICK UBA domain-containing protein OS=Gallus gallus OX=9031 GN=LOC407092 PE=4 SV=3;tr|A0A3Q2UL03|A0A3Q2UL03_CHICK UBA domain-containing protein OS=Gallus gallus OX=9031 GN=LOC407092 PE=4 SV=1	NaN	21.9192	4	116.54	0	42.855	118970000
E1C5U8	tr|E1C5U8|E1C5U8_CHICK MFS domain-containing protein OS=Gallus gallus OX=9031 GN=SLC18B1 PE=4 SV=3	NaN	22.1032	2	48.858	0	60.91	45052000
E1C5V6	tr|E1C5V6|E1C5V6_CHICK Acyl-coenzyme A oxidase OS=Gallus gallus OX=9031 GN=ACOX2 PE=3 SV=1	NaN	16.9045	1	75.493	0.00045893	8.4892	4293900
E1C645	tr|E1C645|E1C645_CHICK Complex I-B14.5a OS=Gallus gallus OX=9031 GN=NDUFA7 PE=3 SV=3	NaN	25.919	2	12.542	0	54.882	317230000
E1C658	tr|E1C658|E1C658_CHICK ATP synthase subunit d, mitochondrial OS=Gallus gallus OX=9031 GN=ATP5H PE=3 SV=3	NaN	25.9954	7	18.343	0	119.29	802720000
E1C697	tr|E1C697|E1C697_CHICK Glutathione peroxidase OS=Gallus gallus OX=9031 GN=GPX7 PE=3 SV=1	NaN	22.4714	1	23.541	0.00083438	6.8855	81413000
E1C6A1	tr|E1C6A1|E1C6A1_CHICK Proton-translocating NAD(P)(+) transhydrogenase OS=Gallus gallus OX=9031 GN=NNT PE=3 SV=4	NaN	22.891	7	113.78	0	62.075	334470000
E1C6A7	tr|E1C6A7|E1C6A7_CHICK Uncharacterized protein OS=Gallus gallus OX=9031 GN=ZCCHC11 PE=4 SV=4	NaN	19.0245	1	174.3	0.0084777	5.7	42127000
E1C6A8	tr|E1C6A8|E1C6A8_CHICK Pre-mRNA-splicing factor 38A OS=Gallus gallus OX=9031 GN=PRPF38A PE=3 SV=1	NaN	19.5214	1	37.46	0.00043085	7.316	10536000
E1C6C2	tr|E1C6C2|E1C6C2_CHICK Uncharacterized protein OS=Gallus gallus OX=9031 GN=FAM103A1 PE=4 SV=3	NaN	19.8545	1	14.002	0.00045914	8.4931	5687900
E1C6C9	tr|E1C6C9|E1C6C9_CHICK Complex I-PDSW OS=Gallus gallus OX=9031 GN=NDUFB10 PE=3 SV=1	NaN	23.5876	5	20.497	0	39.953	100850000
E1C6G6	tr|E1C6G6|E1C6G6_CHICK Signal recognition particle 54 kDa protein OS=Gallus gallus OX=9031 GN=SRP54 PE=3 SV=3	NaN	21.0348	4	55.696	0	33.928	64453000
E1C6K8	tr|E1C6K8|E1C6K8_CHICK Integrin beta OS=Gallus gallus OX=9031 GN=ITGB6 PE=3 SV=5	NaN	21.9662	1	86.529	0.003102	6.0996	139310000
E1C6N0	tr|E1C6N0|E1C6N0_CHICK 26S proteasome regulatory subunit RPN11 OS=Gallus gallus OX=9031 GN=PSMD14 PE=4 SV=2	NaN	25.39	5	34.567	0	37.551	659560000
E1C6N5	tr|E1C6N5|E1C6N5_CHICK Acetyltransferase component of pyruvate dehydrogenase complex OS=Gallus gallus OX=9031 GN=DLAT PE=3 SV=1	NaN	23.3265	8	66.522	0	96.401	347130000
E1C6Q1	sp|E1C6Q1|PCH2_CHICK Pachytene checkpoint protein 2 homolog OS=Gallus gallus OX=9031 GN=TRIP13 PE=3 SV=1	NaN	20.0593	2	49.079	0	12.769	25130000
E1C6R6	tr|E1C6R6|E1C6R6_CHICK Nucleolar protein 16 OS=Gallus gallus OX=9031 GN=NOP16 PE=3 SV=1	NaN	23.2505	3	21.327	0	29.593	109770000
E1C6T8;A0A1L1RQW9	tr|E1C6T8|E1C6T8_CHICK Eukaryotic translation initiation factor 3 subunit I OS=Gallus gallus OX=9031 GN=EIF3I PE=3 SV=1;tr|A0A1L1RQW9|A0A1L1RQW9_CHICK WD_REPEATS_REGION domain-containing protein OS=Gallus gallus OX=9031 GN=EIF3I PE=4 SV=2	NaN	23.2339	5	36.489	0	62.527	187440000
E1C6X2	tr|E1C6X2|E1C6X2_CHICK Fibronectin type-II domain-containing protein OS=Gallus gallus OX=9031 GN=SEL1L PE=4 SV=1	NaN	21.2711	3	88.375	0	19.401	96166000
E1C735	tr|E1C735|E1C735_CHICK S-adenosylmethionine synthase OS=Gallus gallus OX=9031 GN=MAT1A PE=3 SV=1	NaN	21.141	1	43.752	0.001224	6.6284	39312000
E1C769;A0A1D5PCV7	tr|E1C769|E1C769_CHICK Uncharacterized protein OS=Gallus gallus OX=9031 GN=G3BP2 PE=4 SV=4;tr|A0A1D5PCV7|A0A1D5PCV7_CHICK Uncharacterized protein OS=Gallus gallus OX=9031 GN=G3BP2 PE=4 SV=1	NaN	22.9534	4	54.046	0	40.844	178690000
E1C7A7	tr|E1C7A7|E1C7A7_CHICK SMB domain-containing protein OS=Gallus gallus OX=9031 GN=VTN PE=4 SV=2	NaN	21.9572	2	51.65	0	19.703	73289000
E1C7H6	tr|E1C7H6|E1C7H6_CHICK SERPIN domain-containing protein OS=Gallus gallus OX=9031 GN=SERPINF1 PE=3 SV=2	NaN	17.2731	1	46.505	0.0053537	5.9976	3959600
E1C7I2	tr|E1C7I2|E1C7I2_CHICK Uncharacterized protein OS=Gallus gallus OX=9031 GN=MRPL14 PE=3 SV=3	NaN	22.5568	4	16.265	0	55.353	49358000
E1C7J0	tr|E1C7J0|E1C7J0_CHICK Heme oxygenase OS=Gallus gallus OX=9031 GN=HMOX2 PE=3 SV=2	NaN	22.039	4	35.366	0	52.351	73257000
E1C7J9	tr|E1C7J9|E1C7J9_CHICK RNA cytidine acetyltransferase OS=Gallus gallus OX=9031 GN=NAT10 PE=3 SV=4	NaN	21.6272	6	114.51	0	54.146	174910000
E1C7K1	tr|E1C7K1|E1C7K1_CHICK Uncharacterized protein OS=Gallus gallus OX=9031 GN=FAM98B PE=3 SV=5	NaN	22.3739	2	47.601	0	17.136	81529000
E1C7K8	tr|E1C7K8|E1C7K8_CHICK NADH dehydrogenase [ubiquinone] 1 alpha subcomplex assembly factor 4 OS=Gallus gallus OX=9031 GN=NDUFAF4 PE=3 SV=2	NaN	20.9791	1	19.957	0	49.965	18603000
E1C7M7	tr|E1C7M7|E1C7M7_CHICK Uncharacterized protein OS=Gallus gallus OX=9031 GN=CTNNA1 PE=3 SV=4	NaN	25.2055	18	100.04	0	323.31	1818400000
E1C7S2	tr|E1C7S2|E1C7S2_CHICK SCP2 domain-containing protein OS=Gallus gallus OX=9031 GN=HSDL2 PE=4 SV=2	NaN	26.084	10	44.234	0	185.19	1849400000
E1C7T1	tr|E1C7T1|E1C7T1_CHICK SERPIN domain-containing protein OS=Gallus gallus OX=9031 GN=SPIA1 PE=3 SV=1	NaN	20.2096	2	48.714	0	11.604	30313000
E1C7Z0	tr|E1C7Z0|E1C7Z0_CHICK WD_REPEATS_REGION domain-containing protein OS=Gallus gallus OX=9031 GN=UTP18 PE=4 SV=4	NaN	20.3435	3	66.495	0	17.598	41245000
E1C843	tr|E1C843|E1C843_CHICK Integrator complex subunit 12 OS=Gallus gallus OX=9031 GN=INTS12 PE=3 SV=3	NaN	20.8975	2	48.739	0	81.325	39067000
E1C852;A0A1D5NU14	tr|E1C852|E1C852_CHICK Uncharacterized protein OS=Gallus gallus OX=9031 GN=PDLIM1 PE=4 SV=1;tr|A0A1D5NU14|A0A1D5NU14_CHICK Uncharacterized protein OS=Gallus gallus OX=9031 GN=PDLIM1 PE=4 SV=1	NaN	20.6971	4	35.66	0	35.104	28900000
E1C891;A0A1L1RKB6;A0A1D5PVD4;A0A3Q2TSL7	tr|E1C891|E1C891_CHICK Uncharacterized protein OS=Gallus gallus OX=9031 GN=PARVB PE=3 SV=2;tr|A0A1L1RKB6|A0A1L1RKB6_CHICK Uncharacterized protein OS=Gallus gallus OX=9031 GN=PARVB PE=3 SV=2;tr|A0A1D5PVD4|A0A1D5PVD4_CHICK Uncharacterized protein OS=Gallus g	NaN	22.5703	5	41.883	0	58.153	124560000
E1C892	tr|E1C892|E1C892_CHICK MRP-L46 domain-containing protein OS=Gallus gallus OX=9031 GN=MRPL46 PE=3 SV=2	NaN	24.6656	4	32.839	0	27.741	505650000
E1C896	tr|E1C896|E1C896_CHICK Selenoprotein K OS=Gallus gallus OX=9031 GN=SELENOK PE=3 SV=1	NaN	23.0209	1	10.158	0	19.81	34045000
E1C8H2	tr|E1C8H2|E1C8H2_CHICK Uncharacterized protein OS=Gallus gallus OX=9031 GN=TEX264 PE=4 SV=2	NaN	20.7655	1	35.957	0	11.565	17825000
E1C8M8	tr|E1C8M8|E1C8M8_CHICK (S)-3-amino-2-methylpropionate transaminase OS=Gallus gallus OX=9031 GN=ABAT PE=3 SV=3	NaN	20.9037	2	56.552	0	15.302	62778000
E1C8P2	tr|E1C8P2|E1C8P2_CHICK 3-phosphoadenosine-5-phosphosulfate synthase OS=Gallus gallus OX=9031 GN=PAPSS1 PE=3 SV=1	NaN	22.2344	5	70.805	0	31.143	167760000
E1C8S9	tr|E1C8S9|E1C8S9_CHICK J domain-containing protein OS=Gallus gallus OX=9031 GN=DNAJC9 PE=4 SV=1	NaN	24.7163	6	29.844	0	66.135	358340000
E1C8T5	tr|E1C8T5|E1C8T5_CHICK Sm domain-containing protein OS=Gallus gallus OX=9031 GN=LSM6 PE=3 SV=3	NaN	23.2985	1	9.1275	0.0031141	6.1411	51586000
E1C8T8	tr|E1C8T8|E1C8T8_CHICK Uncharacterized protein OS=Gallus gallus OX=9031 GN=UTP14A PE=3 SV=4	NaN	19.2754	2	86.663	0	12.465	21574000
E1C8U1	tr|E1C8U1|E1C8U1_CHICK Nucleoporin NUP53 OS=Gallus gallus OX=9031 GN=LOC107056600 PE=3 SV=2	NaN	23.8329	7	34.491	0	125.84	224130000
E1C8Y3	tr|E1C8Y3|E1C8Y3_CHICK Actin-related protein 2/3 complex subunit 3 OS=Gallus gallus OX=9031 GN=ARPC3 PE=3 SV=3	NaN	22.0805	1	20.549	0	11.154	44350000
E1C8Y9	tr|E1C8Y9|E1C8Y9_CHICK RRM domain-containing protein OS=Gallus gallus OX=9031 GN=SRSF3 PE=4 SV=1	NaN	27.1504	3	19.329	0	35	1042800000
E1C907	tr|E1C907|E1C907_CHICK Uncharacterized protein OS=Gallus gallus OX=9031 GN=MRPS16 PE=3 SV=1	NaN	22.9698	2	14.842	0	25.979	73935000
E1C936	tr|E1C936|E1C936_CHICK Uncharacterized protein OS=Gallus gallus OX=9031 GN=NOP14 PE=3 SV=4	NaN	18.4823	3	101.36	0	18.588	15014000
E1C937	tr|E1C937|E1C937_CHICK Uncharacterized protein OS=Gallus gallus OX=9031 GN=AGR2 PE=4 SV=1	NaN	20.3638	2	19.842	0	12.121	10794000
E1C944	tr|E1C944|E1C944_CHICK acidPPc domain-containing protein OS=Gallus gallus OX=9031 GN=PLPP3 PE=3 SV=2	NaN	19.3568	1	35.146	0.00047893	10.603	9399400
E1C947	tr|E1C947|E1C947_CHICK Golgin subfamily A member 5 OS=Gallus gallus OX=9031 GN=GOLGA5 PE=4 SV=3	NaN	18.9409	1	82.892	0.0016175	6.5024	21639000
E1C9A0;A0A3Q2UF99;A0A1D5PHC2	tr|E1C9A0|E1C9A0_CHICK TPR_REGION domain-containing protein OS=Gallus gallus OX=9031 GN=NASP PE=3 SV=4;tr|A0A3Q2UF99|A0A3Q2UF99_CHICK TPR_REGION domain-containing protein OS=Gallus gallus OX=9031 GN=NASP PE=3 SV=1;tr|A0A1D5PHC2|A0A1D5PHC2_CHICK TPR_REGION	NaN	20.986	2	47.044	0	19.849	56076000
E1C9D7	tr|E1C9D7|E1C9D7_CHICK Uncharacterized protein OS=Gallus gallus OX=9031 GN=CCDC40 PE=4 SV=4	NaN	17.5501	1	108.14	0.0081181	5.7172	10172000
E1C9F5	tr|E1C9F5|E1C9F5_CHICK Pitrilysin metalloproteinase 1 OS=Gallus gallus OX=9031 GN=PITRM1 PE=3 SV=1	NaN	23.1796	14	117.31	0	193.54	494030000
E1C9H4	tr|E1C9H4|E1C9H4_CHICK Uncharacterized protein OS=Gallus gallus OX=9031 GN=MRPS17 PE=3 SV=1	NaN	24.2329	3	15.502	0	23.242	98579000
E1C9H8;F1NC65	tr|E1C9H8|E1C9H8_CHICK Uncharacterized protein OS=Gallus gallus OX=9031 GN=PRKAR2A PE=3 SV=1;tr|F1NC65|F1NC65_CHICK Uncharacterized protein OS=Gallus gallus OX=9031 GN=PRKAR2B PE=3 SV=3	NaN	21.0352	2	45.502	0	13.588	47275000
E1C9J2;A0A3Q2TZ88	tr|E1C9J2|E1C9J2_CHICK Uncharacterized protein OS=Gallus gallus OX=9031 GN=MANF PE=3 SV=3;tr|A0A3Q2TZ88|A0A3Q2TZ88_CHICK Uncharacterized protein OS=Gallus gallus OX=9031 GN=MANF PE=4 SV=1	NaN	24.6068	6	20.386	0	47.244	255490000
E3VVM5	tr|E3VVM5|E3VVM5_CHICK Elongation of very long chain fatty acids protein 1 OS=Gallus gallus OX=9031 GN=ELOVL1 PE=2 SV=1	NaN	21.9454	1	33.89	0.0060583	5.9184	28270000
F1N832	tr|F1N832|F1N832_CHICK Uncharacterized protein OS=Gallus gallus OX=9031 GN=EMG1 PE=3 SV=3	NaN	21.0953	2	25.566	0	13.351	29123000
F1N850	tr|F1N850|F1N850_CHICK Uncharacterized protein OS=Gallus gallus OX=9031 GN=PAPPA PE=3 SV=4	NaN	20.2771	1	185.91	0.0060606	5.9226	91486000
F1N876	tr|F1N876|F1N876_CHICK Selenide, water dikinase OS=Gallus gallus OX=9031 GN=SEPHS2L PE=4 SV=2	NaN	23.8229	5	42.922	0	37.385	192900000
F1N8A6	tr|F1N8A6|F1N8A6_CHICK Uncharacterized protein OS=Gallus gallus OX=9031 GN=FAM177A1 PE=4 SV=1	NaN	20.5676	1	23.943	0.00082781	6.8072	15541000
Q5F4B2;F1N8E4	sp|Q5F4B2|SWP70_CHICK Switch-associated protein 70 OS=Gallus gallus OX=9031 GN=SWAP70 PE=2 SV=1;tr|F1N8E4|F1N8E4_CHICK Switch-associated protein 70 OS=Gallus gallus OX=9031 GN=SWAP70 PE=4 SV=3	NaN	18.4649	1	68.411	0.00047281	9.643	13025000
F1N8E6	tr|F1N8E6|F1N8E6_CHICK MPN domain-containing protein OS=Gallus gallus OX=9031 GN=EMC8 PE=3 SV=3	NaN	22.7404	1	22.853	0.00083472	6.8955	77077000
F1N8G4;Q5ZKI2;A0A3Q2UAV2	tr|F1N8G4|F1N8G4_CHICK 2-(3-amino-3-carboxypropyl)histidine synthase subunit 2 OS=Gallus gallus OX=9031 GN=DPH2 PE=3 SV=1;sp|Q5ZKI2|DPH2_CHICK 2-(3-amino-3-carboxypropyl)histidine synthase subunit 2 OS=Gallus gallus OX=9031 GN=DPH2 PE=2 SV=1;tr|A0A3Q2UAV2|	NaN	19.1476	2	52.179	0	10.932	11035000
Q5ZM33;F1N8H6	sp|Q5ZM33|HP1B3_CHICK Heterochromatin protein 1-binding protein 3 OS=Gallus gallus OX=9031 GN=HP1BP3 PE=2 SV=1;tr|F1N8H6|F1N8H6_CHICK Heterochromatin protein 1-binding protein 3 OS=Gallus gallus OX=9031 GN=HP1BP3 PE=4 SV=1	NaN	21.0336	3	61.851	0	22.688	53662000
F1N8J8	tr|F1N8J8|F1N8J8_CHICK Uncharacterized protein OS=Gallus gallus OX=9031 GN=CRIP2 PE=4 SV=3	NaN	22.7093	1	25.971	0.00046838	9.33	82291000
[truncated: 1,000 more rows]
