# Supplementary material for: Determination of Trunk Neural Crest Cell Fate and Susceptibility to Splicing Perturbation by the DLC1-SF3B1-PHF5A Splicing Complex
Source: Research Square preprint supplement (doi:10.21203/rs.3.rs-2603667/v1), 2024-05-09
Supplement: Supplementary file 2 [file 542988eb282e1c71cdaec513.xlsx]

## Sheet: PHF5A gRNA vs Ctrl gRNA(up)
Gene ID	Gene Symbol	Type	log2 (PHF5A gRNA_1_2 /Ctrl gRNA)	Qvalue (PHF5A gRNA_1_2 /Ctrl gRNA)
107049115	'LOC107049115'	mRNA	2.04688	0.0306875
374201	'PITX1'	mRNA	1.91633	0.0306875
396096	'HOXA9'	mRNA	1.84474	0.0349554

## Sheet: PHF5A gRNA vs Ctrl gRNA(down)
Gene ID	Gene Symbol	Type	log2 (PHF5A gRNA_1_2 /Ctrl gRNA)	Qvalue (PHF5A gRNA_1_2 /Ctrl gRNA)
107052718	'LOC107052718'	mRNA	-1.93413	0.0306875
374014	'SPIN1W'	mRNA	-2.17495	0.0306875
770705	'LOC770705'	mRNA	-1.90047	0.00477536

## Sheet: SF3B1 gRNA vs Ctrl gRNA(up)
Gene ID	Gene Symbol	Type	log2 (SF3B1 gRNA_1_2 / Ctrl gRNA)	Qvalue (SF3B1 gRNA_1_2 / Ctrl gRNA)
100049619	'CFTR'	mRNA	1.65582	1.47978e-05
100194427	'CD14'	mRNA	1.34629	0.000564185
100379662	'SCRT2'	mRNA	2.82152	0.00012831
100736561	'PANK4'	mRNA	1.1088	2.12494e-36
100857108	'CHD5'	mRNA	2.17561	6.37341e-72
100857341	'LOC100857341'	mRNA	2.8308	5.4306e-10
100857356	'ZNF532'	mRNA	1.08741	4.79917e-61
100857565	'STX1A'	mRNA	1.5509	6.50672e-51
100857580	'ABHD8'	mRNA	1.10833	4.66672e-06
100857604	'ZAR1'	mRNA	1.02988	2.81523e-06
100857760	'FOXF2'	mRNA	1.03725	1.6098e-07
100857765	'NKX1-2'	mRNA	1.22462	3.888e-27
100857793	'EP400'	mRNA	1.3847	2.89682e-113
100857811	'INSRR'	mRNA	1.74179	6.29941e-15
100857820	'LOC100857820'	mRNA	1.82152	8.93426e-06
100857832	'DDIT3'	mRNA	1.64821	4.84327e-23
100857850	'ZNF252L'	mRNA	1.43399	1.2657e-31
100857856	'LRIG2'	mRNA	1.18716	1.9578e-25
100857919	'OLIG3'	mRNA	1.04157	1.88006e-15
100857974	'ONECUT2'	mRNA	2.01707	1.48523e-06
100857997	'FANCM'	mRNA	1.10628	1.73285e-65
100858074	'STOX1'	mRNA	1.95602	1.17322e-46
100858131	'LOC100858131'	mRNA	1.56776	4.92253e-06
100858277	'ADAMTS18'	mRNA	1.08455	1.72723e-12
100858301	'KSR2'	mRNA	2.5357	4.07715e-10
100858315	'LOC100858315'	mRNA	1.74313	1.28644e-05
100858326	'FAM163B'	mRNA	1.08455	0.000612461
100858381	'LOC100858381'	mRNA	1.61148	7.10453e-05
100858386	'LOC100858386'	mRNA	1.24909	4.50647e-18
100858477	'ZNF624'	mRNA	3.12681	1.4797e-274
100858546	'ZNF541'	mRNA	1.25756	8.01176e-08
100858563	'ADGRD2'	mRNA	1.30702	7.82118e-40
100858576	'CLK1'	mRNA	1.5194	8.49267e-126
100858578	'ROBO3'	mRNA	2.60429	2.82919e-05
100858582	'RAB25'	mRNA	1.24583	0.000450235
100858617	'NT5DC4'	mRNA	1.30674	1.76366e-08
100858619	'PCGF1'	mRNA	1.01091	1.80084e-11
100858664	'2KTGRL'	mRNA	1.59527	2.68361e-25
100858691	'CCDC71'	mRNA	1.62226	6.00538e-117
100858729	'MPND'	mRNA	1.56776	2.51474e-05
100858734	'ZBTB39'	mRNA	1.57854	1.2257e-169
100858765	'GIPR'	mRNA	3.82152	1.13418e-05
100858796	'LOC100858796'	mRNA	1.36482	5.65099e-18
100858851	'ZNF367'	mRNA	1.30419	2.7393e-19
100858895	'BPTF'	mRNA	1.04643	3.88795e-69
100858936	'PAQR9'	mRNA	1.0313	0.000164221
100858937	'LOC100858937'	mRNA	4.04365	0.000752802
100858989	'CA13'	mRNA	2.21233	3.54564e-28
100859020	'LOC100859020'	mRNA	1.073	2.08047e-05
100859023	'AHDC1'	mRNA	1.09219	7.80973e-18
100859030	'FOXB1'	mRNA	1.55326	2.01115e-77
100859089	'NINL'	mRNA	2.35752	3.3811e-102
100859132	'RASGRF2'	mRNA	1.77421	0.000537903
100859196	'STAT6'	mRNA	1.239	2.84145e-12
100859211	'USP40'	mRNA	1.76639	2.21966e-36
100859215	'CCNT1'	mRNA	1.22163	6.20587e-81
100859224	'GPR62'	mRNA	2.61552	1.42294e-23
100859250	'FRMPD1'	mRNA	3.25199	1.8545e-25
100859302	'LOC100859302'	mRNA	1.29243	3.05418e-26
100859325	'PLXNB1'	mRNA	1.08517	4.12437e-73
100859374	'MHCIA2'	mRNA	1.18945	3.90976e-11
100859434	'THNSL1'	mRNA	1.55407	3.49673e-40
100859454	'LOC100859454'	mRNA	1.38357	3.7553e-34
100859531	'BTN3A3L2'	mRNA	3.96886	1.24936e-16
100859541	'SYCE2'	mRNA	1.60983	5.30623e-06
100859557	'NCAPG2'	mRNA	1.6806	2.6464e-59
100859602	'LOC100859602'	mRNA	1.21879	1.41928e-06
100859628	'MR1'	mRNA	2.47289	1.87206e-06
100859636	'LOC100859636'	mRNA	2.2131	2.26653e-06
100859755	'ADGRB1'	mRNA	1.52367	1.22716e-08
100859829	'ZNF362'	mRNA	1.27613	6.78154e-123
100859848	'LOC100859848'	mRNA	1.34537	3.55353e-11
100859910	'LOC100859910'	mRNA	2.38124	1.55672e-25
101747275	'KLHL35'	mRNA	1.59909	1.16267e-06
101747322	'WT1'	mRNA	1.30533	1.47652e-17
101747373	'LOC101747373'	mRNA	1.11364	2.89519e-69
101747382	'COL2A1L'	mRNA	1.87503	3.80586e-40
101747443	'LOC101747443'	mRNA	1.1044	4.23771e-22
101747453	'GPRC5B'	mRNA	1.61055	2.09233e-18
101747803	'LOC101747803'	mRNA	2.36439	5.54733e-05
101747825	'ACTL6B'	mRNA	1.20836	0.000739302
101747831	'AKNAD1'	mRNA	1.56776	0.00066294
101747860	'LOC101747860'	mRNA	2.78438	2.35122e-112
101747869	'LOC101747869'	mRNA	1.67468	3.02166e-66
101748015	'LENG8'	mRNA	2.1845	2.17044e-232
101748017	'LOC101748017'	mRNA	2.62221	0.000628994
101748153	'LOC101748153'	mRNA	1.10401	3.7614e-17
101748321	'MYO9A'	mRNA	1.66506	1.31761e-106
101748429	'TRIM32'	mRNA	1.0621	1.3069e-29
101748485	'VWCE'	mRNA	1.23597	8.45939e-32
101748577	'LOC101748577'	mRNA	1.82152	2.98099e-05
101748706	'LOC101748706'	mRNA	1.44135	1.02476e-88
101748749	'ZNF469'	mRNA	1.2131	8.05938e-08
101748756	'RYR1L1'	mRNA	1.01537	3.17344e-43
101748931	'GDF15'	mRNA	1.77421	6.40295e-07
101748949	'KIF17'	mRNA	3.07678	1.11648e-05
101748987	'LOC101748987'	mRNA	1.05919	6.43254e-09
101749067	'IF2L'	mRNA	1.25636	2.30524e-05
101749113	'SPTBN4L'	mRNA	1.99202	6.14559e-13
101749117	'CARMIL3'	mRNA	1.38683	4.64367e-33
101749138	'LOC101749138'	mRNA	1.06209	5.11426e-116
101749175	'LOC101749175'	mRNA	2.00483	0.000191407
101749222	'LOC101749222'	mRNA	1.59822	8.39823e-19
101749229	'PLA2G4B'	mRNA	4.77421	4.58265e-06
101749600	'CCDC173L'	mRNA	1.08234	4.52344e-05
101749795	'LOC101749795'	mRNA	3.05319	2.92201e-12
101749950	'LOC101749950'	mRNA	1.03361	3.15189e-40
101750014	'LOC101750014'	mRNA	2.45638	0
101750031	'MYO15A'	mRNA	3.51118	0.000147181
101750035	'LOC101750035'	mRNA	1.77068	1.07434e-05
101750093	'NPAS4'	mRNA	1.04629	4.80013e-08
101750125	'LOC101750125'	mRNA	2.56776	0.000931082
101750255	'SPTBN2'	mRNA	1.21011	4.30531e-77
101750329	'ZNF251L'	mRNA	1.33245	7.14807e-12
101750338	'MFHAS1'	mRNA	1.37415	8.38887e-26
101750365	'LYRM9'	mRNA	1.14416	2.60543e-05
101750381	'KIAA0408'	mRNA	3.8613	1.03557e-71
101750513	'LOC101750513'	mRNA	1.12735	1.06092e-16
101750514	'LOC101750514'	mRNA	3.32675	0.000525234
101750591	'LOC101750591'	mRNA	1.44077	1.7048e-76
101750689	'BHLHE41'	mRNA	1.24236	0.000297346
101750767	'SCG2'	mRNA	2.40752	2.7479e-34
101750781	'SSH1'	mRNA	1.58217	2.39622e-75
101750873	'CDK20'	mRNA	3.35275	5.07731e-16
101750894	'ARHGAP23'	mRNA	1.62362	1.58837e-73
101750971	'PPP1R26'	mRNA	1.83794	6.50424e-34
101750984	'PLEKHG3'	mRNA	1.20075	1.6549e-73
101750993	'LOC101750993'	mRNA	3.45228	0.000224954
101751094	'LOC101751094'	mRNA	1.4674	3.15161e-11
101751235	'RAB41'	mRNA	1.45933	1.51269e-73
101751399	'LOC101751399'	mRNA	2.03716	0
101751423	'LOC101751423'	mRNA	1.73195	5.65432e-174
101751656	'FGFBP3'	mRNA	1.66087	3.13285e-07
101751828	'ZFP36L1'	mRNA	1.17769	1.08702e-74
101751943	'RAPGEF6'	mRNA	1.32426	7.88508e-110
101751955	'LOC101751955'	mRNA	1.25843	1.05378e-12
101752023	'CREBZF'	mRNA	2.28389	2.45968e-57
101752055	'FAM160B2'	mRNA	2.0617	3.53758e-29
101752135	'LOC101752135'	mRNA	1.81486	0.000107396
101752154	'EHBP1L1'	mRNA	2.00622	1.60492e-32
101752179	'FOXA1'	mRNA	1.35477	1.54333e-13
101752246	'CBX7'	mRNA	2.70489	7.07454e-43
102725543	'EGR3'	mRNA	1.80592	0.00038999
103875463	'OTX5'	mRNA	2.41509	5.41108e-09
107048988	'DOCK3'	mRNA	2.93928	1.19585e-15
107048993	'HPS5'	mRNA	1.09969	2.50542e-31
107049013	'FGD4'	mRNA	1.45228	4.85901e-06
107049018	'LOC107049018'	mRNA	1.28456	6.92878e-10
107049060	'HBE'	mRNA	2.59336	0
107049066	'LOC107049066'	mRNA	4.15272	3.68443e-07
107049095	'LOC107049095'	mRNA	1.13414	3.25379e-23
107049103	'LOC107049103'	mRNA	1.66619	1.65164e-05
107049106	'LOC107049106'	mRNA	2.03308	2.74059e-19
107049108	'LOC107049108'	mRNA	4.65496	1.25617e-05
107049114	'LOC107049114'	mRNA	4.16378	0.000381711
107049115	'LOC107049115'	mRNA	2.8199	5.5108e-244
107049117	'LOC107049117'	mRNA	1.27046	4.59609e-11
107049129	'LOC107049129'	mRNA	2.04001	1.208e-41
107049132	'LOC107049132'	mRNA	2.68025	0
107049165	'LOC107049165'	mRNA	1.70021	4.80508e-08
107049189	'LOC107049189'	mRNA	2.27365	1.13533e-05
107049246	'GDF11'	mRNA	1.24196	4.9192e-18
107049247	'INHBE'	mRNA	4.32675	0.000138728
107049262	'LOC107049262'	mRNA	2.69882	6.59236e-55
107049269	'GLYATL3W'	mRNA	1.52843	1.16747e-10
107049357	'LOC107049357'	mRNA	1.98555	3.15911e-14
107049448	'LOC107049448'	mRNA	3.74997	1.1049e-09
107049470	'MANBAL7'	mRNA	1.52125	5.96355e-70
107049482	'LOC107049482'	mRNA	1.84838	6.57241e-09
107049603	'LOC107049603'	mRNA	2.77421	0.000191356
107049638	'LOC107049638'	mRNA	6.7951	2.7782e-21
107049644	'LOC107049644'	mRNA	2.32781	1.25861e-23
107049647	'LOC107049647'	mRNA	1.14743	0.000161236
107049660	'LOC107049660'	mRNA	1.12719	0.00046592
107049673	'LOC107049673'	mRNA	1.27089	2.5643e-05
107049688	'LOC107049688'	mRNA	1.14159	2.89699e-14
107049738	'LOC107049738'	mRNA	1.40434	3.80614e-153
107049779	'LOC107049779'	mRNA	4.0892	0.000585536
107049800	'LOC107049800'	mRNA	3.32675	0.000525234
107049815	'LOC107049815'	mRNA	2.33671	2.53729e-58
107049832	'CCDC130'	mRNA	2.38909	5.6286e-39
107049861	'TNS2'	mRNA	1.44517	3.72366e-88
107049901	'LOC107049901'	mRNA	2.12495	1.31493e-19
107049925	'LOC107049925'	mRNA	2.46414	8.20177e-05
107050024	'LOC107050024'	mRNA	2.41569	1.9306e-72
107050073	'LOC107050073'	mRNA	3.97585	1.19965e-42
107050148	'LOC107050148'	mRNA	2.01215	7.34782e-40
107050152	'LOC107050152'	mRNA	3.06582	2.10739e-57
107050186	'LOC107050186'	mRNA	2.93986	3.68332e-115
107050349	'LOC107050349'	mRNA	2.19697	2.63802e-44
107050382	'GLYATL3'	mRNA	3.18873	3.29881e-08
107050463	'LOC107050463'	mRNA	2.54332	1.56575e-226
107050560	'LOC107050560'	mRNA	1.06293	2.97985e-05
107050589	'LOC107050589'	mRNA	4.95479	8.53953e-07
107050630	'LOC107050630'	mRNA	2.0042	6.1097e-05
107050668	'LOC107050668'	mRNA	3.0994	1.31012e-41
107050692	'LOC107050692'	mRNA	2.52553	2.79907e-11
107050732	'LOC107050732'	mRNA	1.35275	5.68695e-06
107050733	'LOC107050733'	mRNA	1.17343	1.46495e-10
107050768	'LOC107050768'	mRNA	1.6863	6.34047e-203
107050798	'LOC107050798'	mRNA	1.71682	1.79365e-62
107050830	'LOC107050830'	mRNA	2.71332	4.62271e-47
107050833	'LOC107050833'	mRNA	2.5977	1.21662e-18
107050871	'LOC107050871'	mRNA	1.72134	1.91017e-51
107050886	'LOC107050886'	mRNA	1.41164	4.62032e-14
107050915	'LOC107050915'	mRNA	1.83097	3.88644e-09
107050995	'LOC107050995'	mRNA	1.18734	9.89306e-28
107050998	'LOC107050998'	mRNA	1.47634	1.00382e-21
107051165	'LOC107051165'	mRNA	2.99661	2.53707e-05
107051198	'LOC107051198'	mRNA	1.89591	0.000522333
107051270	'ZIC5'	mRNA	1.83758	4.9559e-27
107051278	'LOC107051278'	mRNA	1.89886	1.68345e-10
107051287	'IL11'	mRNA	4.35918	2.86634e-08
107051305	'LOC107051305'	mRNA	2.55289	9.54628e-21
107051471	'LOC107051471'	mRNA	2.25018	9.71578e-48
107051491	'LOC107051491'	mRNA	3.18925	3.22396e-06
107051757	'LOC107051757'	mRNA	1.74524	1.88302e-27
107051875	'LOC107051875'	mRNA	1.43367	9.42689e-05
107051987	'POU3F3'	mRNA	1.56147	1.59789e-19
107052002	'CABYR'	mRNA	1.59594	7.80363e-05
107052097	'TMEM255A'	mRNA	1.30989	6.98865e-31
107052854	'BCL2L11'	mRNA	1.69329	2.61123e-29
107052930	'ZFP36L2'	mRNA	1.12371	4.32423e-106
107053055	'LOC107053055'	mRNA	2.63991	1.91592e-05
107053098	'PRDM13'	mRNA	1.28879	0.000409052
107053103	'POU3F2'	mRNA	1.46351	8.13508e-39
107053233	'LOC107053233'	mRNA	3.39758	8.20811e-08
107053676	'TLL2'	mRNA	1.38909	3.423e-10
107053684	'CBX6'	mRNA	1.19789	1.40468e-43
107054036	'LOC107054036'	mRNA	1.04976	3.86706e-35
107054087	'LOC107054087'	mRNA	1.47139	1.3273e-08
107054237	'SKOR1'	mRNA	3.62221	6.27266e-05
107054381	'CELSR3'	mRNA	2.0078	3.91629e-141
107054458	'LOC107054458'	mRNA	2.19868	1.88758e-19
107054487	'LOC107054487'	mRNA	3.50298	3.17307e-05
107054618	'BRICD5'	mRNA	2.56776	4.16143e-05
107054716	'LOC107054716'	mRNA	1.59626	6.22567e-14
107054986	'LOC107054986'	mRNA	2.20361	9.02672e-10
107055137	'CRTC2'	mRNA	1.55013	1.31034e-07
107055293	'LOC107055293'	mRNA	1.09449	2.77491e-82
107055300	'RAPGEFL1'	mRNA	1.7668	2.45391e-07
107055329	'LOC107055329'	mRNA	4.20717	9.6564e-14
107055331	'LOC107055331'	mRNA	2.26239	9.07776e-06
107055427	'LOC107055427'	mRNA	4.22452	1.57955e-07
107055431	'LOC107055431'	mRNA	3.15272	5.85542e-11
107055505	'LOC107055505'	mRNA	3.10815	3.45934e-08
107055587	'LOC107055587'	mRNA	6.22505	5.08084e-15
107055605	'LOC107055605'	mRNA	4.2247	6.34996e-14
107057183	'BORL1'	mRNA	2.39189	3.91984e-210
107057188	'LOC107057188'	mRNA	3.53185	0
107057195	'ODF3L15'	mRNA	2.58603	0
107057197	'LOC107057197'	mRNA	3.32467	9.13636e-05
107057251	'LOC107057251'	mRNA	2.60339	0.000722071
107057363	'LOC107057363'	mRNA	1.41439	1.26085e-37
107057413	'LOC107057413'	mRNA	2.84711	2.3898e-40
107057415	'LOC107057415'	mRNA	3.53758	1.1448e-243
107057437	'LOC107057437'	mRNA	2.53853	8.85301e-34
112529928	'ZMYND10'	mRNA	2.39088	1.21071e-07
112529954	'LOC112529954'	mRNA	3.23068	0.000375985
112529955	'LOC112529955'	mRNA	1.56776	1.90664e-07
112529958	'LOC112529958'	mRNA	3.27391	0.000278393
112529982	'LOC112529982'	mRNA	1.54915	3.3703e-05
112530086	'LOC112530086'	mRNA	1.23751	8.47842e-06
112530130	'LOC112530130'	mRNA	2.08537	3.19597e-24
112530163	'LOC112530163'	mRNA	1.22651	2.89314e-46
112530167	'LOC112530167'	mRNA	2.08971	9.4461e-26
112530174	'LOC112530174'	mRNA	1.39687	2.78424e-31
112530189	'LOC112530189'	mRNA	2.8031	1.09964e-06
112530190	'LOC112530190'	mRNA	1.3854	1.51034e-06
112530201	'LOC112530201'	mRNA	1.67795	2.10808e-27
112530206	'LOC112530206'	mRNA	1.11132	5.43665e-36
112530212	'LOC112530212'	mRNA	2.60429	2.82919e-05
112530227	'LOC112530227'	mRNA	1.08185	3.29938e-26
112530279	'LOC112530279'	mRNA	2.14743	9.24892e-07
112530280	'CTU1'	mRNA	1.81218	3.16077e-06
112530302	'LOC112530302'	mRNA	4.10254	1.80828e-18
112530336	'LOC112530336'	mRNA	2.69175	2.72041e-10
112530395	'FAM117A'	mRNA	1.04003	1.14032e-30
112530451	'LOC112530451'	mRNA	1.2232	1.00376e-14
112530477	'LOC112530477'	mRNA	2.03725	0.000692314
112530482	'LOC112530482'	mRNA	2.24368	9.11262e-35
112530488	'LOC112530488'	mRNA	2.38399	9.54522e-45
112530489	'LOC112530489'	mRNA	3.2391	3.46442e-105
112530490	'LOC112530490'	mRNA	3.02045	9.5583e-53
112530492	'LOC112530492'	mRNA	3.94627	3.41127e-06
112530942	'LOC112530942'	mRNA	1.38403	0
112530945	'LOC112530945'	mRNA	1.10703	2.39839e-16
112530959	'LOC112530959'	mRNA	1.65392	3.53692e-09
112530969	'ICAM5'	mRNA	1.65944	2.83549e-12
112530985	'LOC112530985'	mRNA	3.41164	1.41803e-10
112531014	'LOC112531014'	mRNA	2.39756	1.6978e-63
112531015	'LOC112531015'	mRNA	2.33898	1.5691e-39
112531016	'LOC112531016'	mRNA	2.28184	1.23518e-82
112531017	'LOC112531017'	mRNA	2.74677	0
112531020	'LOC112531020'	mRNA	3.2058	2.91535e-30
112531021	'LOC112531021'	mRNA	2.15381	7.78244e-72
112531026	'LOC112531026'	mRNA	2.96501	4.19192e-121
112531027	'LOC112531027'	mRNA	2.77726	4.16978e-88
112531028	'LOC112531028'	mRNA	1.71362	7.63566e-23
112531029	'LOC112531029'	mRNA	2.14043	3.25176e-10
112531034	'LOC112531034'	mRNA	2.04028	6.45019e-266
112531035	'LOC112531035'	mRNA	2.34595	2.48388e-50
112531060	'LOC112531060'	mRNA	1.44277	1.58e-21
112531061	'LOC112531061'	mRNA	2.9364	1.01056e-24
112531071	'LOC112531071'	mRNA	2.59026	1.27175e-12
112531075	'LOC112531075'	mRNA	2.98413	1.86027e-05
112531237	'LOC112531237'	mRNA	2.85452	0
112531242	'LOC112531242'	mRNA	2.43211	0.000486557
112531294	'LOC112531294'	mRNA	1.97775	3.27626e-08
112531388	'LOC112531388'	mRNA	2.18288	1.17288e-15
112531518	'LOC112531518'	mRNA	1.16853	3.58289e-06
112531540	'LOC112531540'	mRNA	1.76304	8.85188e-08
112531599	'LOC112531599'	mRNA	1.62825	7.36657e-18
112531600	'LOC112531600'	mRNA	2.25505	2.50518e-69
112531692	'LOC112531692'	mRNA	1.14347	5.47264e-65
112531790	'LOC112531790'	mRNA	1.27914	5.86547e-05
112531889	'LOC112531889'	mRNA	1.68835	1.70497e-07
112532077	'LOC112532077'	mRNA	1.3714	1.22392e-06
112532108	'LOC112532108'	mRNA	1.65159	5.97471e-12
112532278	'LOC112532278'	mRNA	2.62221	0.000628994
112532368	'LOC112532368'	mRNA	1.25834	6.88901e-12
112532477	'LOC112532477'	mRNA	2.35918	2.69406e-05
112532514	'LOC112532514'	mRNA	2.13203	2.49247e-15
112532616	'LOC112532616'	mRNA	1.10847	8.65621e-17
112532659	'LOC112532659'	mRNA	1.30418	4.12602e-09
112532686	'LOC112532686'	mRNA	1.92743	3.33328e-32
112532751	'LOC112532751'	mRNA	1.31841	2.76135e-12
112532872	'LOC112532872'	mRNA	1.41784	2.18715e-13
112532971	'LOC112532971'	mRNA	1.32675	8.26094e-05
112533019	'LOC112533019'	mRNA	2.91172	5.72769e-05
112533354	'LOC112533354'	mRNA	1.66752	1.28118e-19
112533507	'LOC112533507'	mRNA	2.28236	0.000588026
112533548	'LOC112533548'	mRNA	1.86227	0.000306748
112533549	'LOC112533549'	mRNA	1.20646	2.69225e-10
112533550	'LOC112533550'	mRNA	4.15872	3.19854e-08
373854	'TENM2'	mRNA	1.7734	2.12432e-58
373887	'FZD4'	mRNA	1.48228	2.63456e-37
373896	'UCP3'	mRNA	2.67468	0.000424681
373897	'MUSK'	mRNA	1.17511	3.4739e-08
373904	'TNFRSF10B'	mRNA	1.77089	4.68241e-15
373906	'NRG1'	mRNA	1.09229	6.62142e-07
373910	'NHLH1'	mRNA	1.87424	1.26022e-15
373919	'RUNX2'	mRNA	1.34537	0.000186513
373934	'HOXA13'	mRNA	1.36482	2.49708e-05
373945	'ABCA1'	mRNA	2.62813	6.09608e-14
373975	'IRX2'	mRNA	1.51349	3.60731e-17
373976	'ALX4'	mRNA	2.6574	5.91203e-10
373983	'BRCA1'	mRNA	1.14503	5.90142e-150
373985	'CHRDL1'	mRNA	1.17718	2.91801e-05
373988	'TBX5'	mRNA	1.20901	3.72101e-17
373989	'TBX4'	mRNA	2.85222	5.30613e-12
373990	'TBX2'	mRNA	1.27956	3.95685e-35
373991	'CLOCK'	mRNA	1.96462	2.79167e-28
373998	'CRYBA4'	mRNA	2.71903	5.56415e-264
374003	'POLK'	mRNA	2.60641	9.82456e-25
374021	'RNF111'	mRNA	1.24741	4.37299e-57
374034	'AFAP1'	mRNA	2.52395	6.59357e-24
374046	'COL11A1'	mRNA	1.03165	1.85179e-26
374052	'F5'	mRNA	1.35749	1.05514e-19
374087	'ADARB1'	mRNA	1.24677	7.69635e-13
374092	'CRY2'	mRNA	1.5896	4.132e-166
374105	'RIMBP2'	mRNA	2.80388	1.83885e-11
374116	'PER2'	mRNA	3.04585	1.01318e-288
374120	'PPARA'	mRNA	1.36523	2.62541e-10
374139	'BRCA2'	mRNA	1.23786	7.8669e-57
374148	'SOX9'	mRNA	1.50533	2.8722e-29
374169	'CACNA1B'	mRNA	1.12881	3.18652e-07
374174	'CAMK2B'	mRNA	2.01198	1.11464e-22
374175	'CAMK2A'	mRNA	1.70131	4.40816e-11
374182	'ROCK2'	mRNA	1.15015	1.10611e-59
374185	'IRX1'	mRNA	1.61996	1.93352e-46
374187	'PTCH2'	mRNA	1.37511	0
374195	'CHDB1'	mRNA	1.34049	4.36428e-64
374223	'LEPR'	mRNA	4.62221	6.38192e-10
374228	'KCND3'	mRNA	2.49181	8.97317e-05
374240	'SOX1'	mRNA	1.37311	5.18908e-27
374253	'TNKS2'	mRNA	1.22663	1.26811e-31
374259	'CACNB4'	mRNA	2.89707	3.26065e-18
378791	'RTN1'	mRNA	1.18925	1.52131e-05
378902	'DDTNFR23'	mRNA	1.86732	9.28433e-08
378914	'CDKN1A'	mRNA	1.05054	0.000289884
378924	'HAL'	mRNA	2.62221	8.72509e-07
386577	'CHRNA5'	mRNA	1.05666	1.33928e-06
386580	'PTPRC'	mRNA	2.92622	5.32629e-07
386585	'NR2F2'	mRNA	1.03419	2.44606e-54
395067	'CRIM1'	mRNA	1.14531	1.33393e-07
395086	'F7'	mRNA	4.03725	0.000779423
395099	'CREB1'	mRNA	1.06016	1.18765e-62
395103	'LDLR'	mRNA	1.35671	3.64114e-20
395104	'TBX18'	mRNA	2.49959	1.90986e-13
395117	'KCNA2'	mRNA	1.38934	0.00017864
395121	'RHCE'	mRNA	1.5792	1.71681e-11
395124	'CCNL2'	mRNA	2.08277	0
395128	'HES4'	mRNA	1.45025	2.43245e-103
395132	'SMAD3'	mRNA	1.18086	3.87036e-13
395143	'SOX4'	mRNA	1.33458	1.55897e-28
395152	'AXIN2'	mRNA	1.65792	3.93157e-96
395153	'PTPRU'	mRNA	1.90914	1.97711e-140
395166	'FAT4'	mRNA	1.28321	1.61029e-91
395167	'FAT3'	mRNA	1.20353	4.5514e-34
395171	'DSTYK'	mRNA	2.14531	3.47061e-33
395176	'EBF2'	mRNA	1.47066	5.41255e-05
395195	'NBEA'	mRNA	1.27171	2.31415e-22
395207	'CENPI'	mRNA	1.43192	8.86172e-61
395214	'RGMA'	mRNA	1.23656	6.5413e-56
395233	'DYRK1A'	mRNA	1.53345	5.48843e-25
395234	'INVS'	mRNA	1.22004	2.50457e-20
395248	'KCNT1'	mRNA	1.07863	2.12857e-36
395253	'NR2C2'	mRNA	1.45076	1.24755e-46
395259	'TRPV1'	mRNA	3.01526	8.83163e-28
395280	'XIAP'	mRNA	1.59963	2.00841e-35
395293	'SLIT1'	mRNA	1.1834	1.8913e-87
395307	'HOXA4'	mRNA	1.40414	6.09769e-262
395312	'IL18'	mRNA	1.06559	9.29341e-09
395322	'NKX2-1'	mRNA	2.60429	2.82919e-05
395327	'HOXA11'	mRNA	3.88524	3.7053e-25
395328	'HOXD11'	mRNA	3.05319	2.92201e-12
395330	'PTPRJ'	mRNA	1.3153	1.55369e-11
395334	'OPN4-1'	mRNA	2.66174	6.01076e-13
395340	'ADCY5'	mRNA	1.1943	2.52181e-11
395347	'MXRA8'	mRNA	1.06896	3.13065e-05
395357	'CENPF'	mRNA	1.04085	3.09736e-58
395376	'PRKDC'	mRNA	1.14894	1.21396e-69
395381	'LOC395381'	mRNA	2.28236	0.000588026
395389	'ALDH1A3'	mRNA	1.28236	6.1271e-05
395394	'FGF19'	mRNA	1.30314	7.15206e-26
395395	'GAD2'	mRNA	1.78789	0.000148594
395400	'BAZ2B'	mRNA	1.93784	6.37296e-170
395401	'ATM'	mRNA	1.05407	7.89534e-49
395410	'ABL2'	mRNA	1.28031	5.99297e-57
395411	'ZBTB7A'	mRNA	1.09814	7.23779e-28
395412	'ITPR1'	mRNA	1.68766	5.47331e-68
395417	'SIK1'	mRNA	1.0855	8.06421e-57
395427	'TRPV4'	mRNA	1.21647	4.84903e-05
395433	'NPAS2'	mRNA	2.37828	1.79495e-06
395436	'USPL1'	mRNA	2.22592	0
395446	'SALL1'	mRNA	1.88361	0
395483	'SOX8'	mRNA	2.08971	4.28818e-10
395502	'HOXB3'	mRNA	1.18717	1.44983e-246
395507	'P2RX5'	mRNA	1.37428	1.0401e-10
395529	'LEFTY2'	mRNA	1.86732	5.60782e-05
395534	'MYH15'	mRNA	1.03333	2.56268e-06
395537	'VSX1'	mRNA	1.41164	0.000244328
395539	'FOXA2'	mRNA	1.27517	1.42358e-19
395569	'GDNF'	mRNA	1.69044	3.40964e-12
395571	'FZD5'	mRNA	2.15153	3.53213e-26
395574	'PAX2'	mRNA	1.17558	8.54068e-56
395577	'NEUROG2'	mRNA	2.62221	9.67823e-24
395583	'SPRY1'	mRNA	1.16598	6.59482e-56
395591	'NKX6-2'	mRNA	1.54635	6.20012e-33
395609	'MDM2'	mRNA	1.01735	3.20604e-81
395619	'RGS12'	mRNA	1.64662	1.79555e-36
395625	'EFNB2'	mRNA	1.08971	1.99973e-05
395639	'NUMB'	mRNA	1.0828	2.79308e-62
395648	'GPRIN2'	mRNA	1.49025	7.584e-09
395655	'NOTCH1'	mRNA	1.14208	5.32861e-212
395666	'CD44'	mRNA	1.05001	1.0425e-07
395668	'TENM1'	mRNA	2.93771	4.95336e-11
395685	'WSB1'	mRNA	1.14268	2.48539e-175
395689	'ENO2'	mRNA	3.66434	6.22343e-21
395695	'AKAP9'	mRNA	2.32221	0
395699	'NEUROG1'	mRNA	1.96418	8.17234e-07
395752	'NKX6-1'	mRNA	1.3863	4.48427e-121
395764	'CASP1'	mRNA	1.02801	5.18111e-12
395782	'T'	mRNA	1.46656	4.8378e-165
395784	'CLIP1'	mRNA	1.76919	4.18287e-102
395792	'TBX6'	mRNA	1.15966	1.9383e-178
395802	'PROX1'	mRNA	1.57627	9.58219e-06
395806	'PTCH1'	mRNA	1.416	5.65337e-114
395807	'NOS2'	mRNA	2.85146	1.87299e-73
395820	'DLL1'	mRNA	1.11106	6.4514e-146
395864	'HESX1'	mRNA	2.19884	5.2018e-14
395887	'AMH'	mRNA	2.86732	8.56425e-05
395891	'CACNA1C'	mRNA	2.01849	1.6866e-59
395895	'CACNA1D'	mRNA	1.9907	3.52785e-33
395942	'PAX7'	mRNA	1.55097	1.20828e-39
395943	'PAX6'	mRNA	2.2726	4.61656e-145
395959	'NEUROD4'	mRNA	2.34939	7.25963e-25
395967	'EPHA7'	mRNA	1.51856	9.50092e-14
395973	'KCNJ8'	mRNA	1.165	3.21331e-09
395985	'CACNA1S'	mRNA	1.86732	5.75723e-10
395998	'SORL1'	mRNA	1.29909	1.66889e-30
396009	'TNNT1'	mRNA	2.05997	3.74087e-06
396015	'HSD3B1'	mRNA	3.02719	1.79403e-18
396030	'BMPR1B'	mRNA	1.02048	1.69108e-16
396043	'JAG1'	mRNA	1.07794	1.09755e-52
396047	'SNAI1'	mRNA	1.16532	5.10836e-40
396056	'BFSP1'	mRNA	2.91172	5.72769e-05
396062	'CD3E'	mRNA	1.19238	1.61754e-17
396084	'ACTG2'	mRNA	1.97585	2.92472e-06
396085	'NF1'	mRNA	1.17568	6.44387e-141
396096	'HOXA9'	mRNA	1.20746	2.47583e-47
396102	'LRP8'	mRNA	1.7253	4.55692e-19
396104	'SOX11'	mRNA	1.0936	1.93662e-62
396105	'SOX2'	mRNA	2.54462	3.23294e-76
396111	'RYR3'	mRNA	2.67468	3.99805e-07
396117	'GNOT2'	mRNA	1.00248	0.000208022
396126	'INHBB'	mRNA	1.20717	0.000488762
396127	'MELTF'	mRNA	1.16974	6.57447e-24
396131	'ZNF335'	mRNA	1.30366	5.30544e-190
396158	'MYBL1'	mRNA	2.1128	5.76983e-25
396171	'YAP1'	mRNA	1.09078	5.97654e-43
396178	'HOXD12'	mRNA	3.32675	0.000525234
396202	'NRCAM'	mRNA	1.521	1.89288e-14
396207	'NFIX'	mRNA	1.00687	6.3351e-05
396211	'MYH11'	mRNA	1.93341	5.73533e-06
396224	'LOC396224'	mRNA	1.09998	1.59643e-05
396237	'MYO5A'	mRNA	1.43042	3.72866e-78
396239	'BRAF'	mRNA	1.40966	1.25598e-45
396244	'MYB'	mRNA	1.62577	1.12045e-12
396251	'THRA'	mRNA	1.67189	1.06366e-31
396267	'FGF3'	mRNA	1.20293	6.19404e-05
396300	'KBP'	mRNA	1.45228	3.65354e-05
396302	'NOTO'	mRNA	1.13051	4.63758e-23
396318	'GPR50'	mRNA	3.39088	0.000343815
396330	'IRF7'	mRNA	1.18121	2.11275e-07
396370	'C3'	mRNA	1.07168	0.000280346
396383	'ISL1'	mRNA	1.1822	1.92915e-15
396384	'IRF1'	mRNA	2.91172	7.62915e-09
396389	'NTN1'	mRNA	1.10674	2.28008e-50
396395	'ANOS1'	mRNA	1.78293	1.67017e-06
396403	'PTPRZ1'	mRNA	2.11525	1.35845e-73
396407	'TEC'	mRNA	1.20501	3.48771e-06
396415	'HOXD13'	mRNA	2.11525	0.000343032
396420	'ITGAV'	mRNA	1.00175	1.15038e-08
396423	'VIL1'	mRNA	2.56776	8.67966e-08
396427	'TUBB1'	mRNA	1.53146	1.33693e-22
396431	'THRB'	mRNA	3.28236	1.7251e-09
396451	'PTGS2'	mRNA	1.55382	1.29736e-06
396481	'IL1R1'	mRNA	2.15272	0.000240357
396485	'HBBA'	mRNA	2.6463	4.18026e-17
396512	'FOS'	mRNA	1.13036	8.00754e-06
396532	'SLC4A1'	mRNA	5.41576	1.91673e-80
396541	'ZBTB17'	mRNA	1.1189	8.03927e-52
396548	'COL6A3'	mRNA	1.22601	1.59704e-36
403089	'TEAD1'	mRNA	1.24207	1.05744e-128
403122	'ST6GAL2'	mRNA	1.23683	9.19276e-35
414140	'AMY2A'	mRNA	2.80278	2.52724e-18
414746	'CYP2C23a'	mRNA	1.31969	9.23374e-05
414835	'LOC414835'	mRNA	1.23222	3.85835e-08
414880	'LIMS1'	mRNA	1.16871	4.92842e-63
414893	'GRIA1'	mRNA	1.54804	6.64604e-07
414897	'KMT2A'	mRNA	2.56849	4.52421e-124
415327	'PATL2'	mRNA	1.32104	2.19346e-06
415335	'ZNF592'	mRNA	1.58879	1.36447e-48
415376	'VPS13C'	mRNA	1.43718	3.83768e-37
415377	'RORA'	mRNA	1.48507	5.29009e-10
415378	'ICE2'	mRNA	1.83381	6.82295e-27
415392	'LARP6'	mRNA	1.01309	1.20946e-11
415393	'LRRC49'	mRNA	2.02324	7.29695e-17
415405	'CGNL1'	mRNA	1.10908	2.47532e-34
415425	'AP4E1'	mRNA	1.33573	9.80177e-80
415437	'CEP152'	mRNA	1.63893	1.67099e-74
415455	'PDE8A'	mRNA	1.0122	1.07384e-09
415457	'WHAMM'	mRNA	1.58378	1.07303e-45
415464	'LMINA'	mRNA	1.20202	2.62212e-09
415465	'ADAMTSL3'	mRNA	1.80592	1.02623e-08
415470	'TMC3'	mRNA	2.11525	9.39389e-06
415476	'CEMIP'	mRNA	1.92177	1.26845e-16
415478	'LOC415478'	mRNA	2.29359	1.0242e-12
415491	'FANCI'	mRNA	1.02371	8.55171e-44
415507	'CHD2'	mRNA	2.41284	0
415530	'RASL12'	mRNA	1.60429	7.88189e-08
415554	'IQCH'	mRNA	1.33783	4.78948e-15
415560	'ITGA11'	mRNA	1.34972	3.25888e-05
415576	'FRMD5'	mRNA	1.04736	1.86121e-11
415588	'MAP1A'	mRNA	1.51747	1.65121e-39
415594	'DMXL2'	mRNA	1.77574	1.44167e-31
415612	'PJA2'	mRNA	1.0136	4.71075e-11
415630	'KIFC3'	mRNA	1.89852	1.04602e-129
415644	'HERPUD1'	mRNA	1.33567	2.0069e-05
415688	'WDR59'	mRNA	1.04938	2.90603e-44
415706	'OSGIN1'	mRNA	1.30473	0.000931161
415722	'CHD9'	mRNA	2.04391	5.44413e-153
415725	'CYLD'	mRNA	2.18604	4.49161e-77
415732	'ADCY7'	mRNA	1.4735	1.26042e-14
415748	'MYLK3'	mRNA	1.8948	4.73475e-16
415756	'LOC415756'	mRNA	1.2228	0.00025256
415764	'ZNF507'	mRNA	1.41126	9.34033e-12
415772	'GPATCH1'	mRNA	1.19462	5.12792e-49
415782	'KIAA0355'	mRNA	1.22888	2.86031e-16
415786	'CES1L1'	mRNA	2.35444	1.15504e-09
415790	'RRAD'	mRNA	2.45228	8.71079e-06
415805	'PLCG2'	mRNA	1.04065	3.49872e-07
415829	'ZCCHC14'	mRNA	1.60727	1.87699e-100
415830	'JPH3'	mRNA	1.06699	1.72882e-05
415839	'VPS9D1'	mRNA	2.25677	2.33001e-45
415845	'ANKRD11'	mRNA	1.60249	1.39701e-269
415866	'NFAT5'	mRNA	1.42435	2.1926e-226
415878	'ZNF821'	mRNA	1.57236	2.34368e-214
415886	'ADAT1'	mRNA	1.52259	6.54648e-95
415893	'NISCH'	mRNA	1.13002	4.21724e-57
415902	'SFMBT1'	mRNA	1.37275	5.53262e-23
415914	'C12H3orf18'	mRNA	2.18925	2.06898e-88
415943	'DNAH1'	mRNA	2.3153	6.5129e-24
415947	'RBM5'	mRNA	1.5681	0
415958	'ATP2B2'	mRNA	1.26725	7.88475e-05
415959	'SLC6A11'	mRNA	1.56034	2.5218e-06
415969	'CECR5L'	mRNA	1.75019	8.29405e-52
415977	'NUP210'	mRNA	1.01508	2.52774e-07
415978	'HDAC11'	mRNA	2.00687	1.56221e-22
415988	'SUSD3'	mRNA	1.97166	0.000269781
415997	'CCDC66'	mRNA	1.04029	6.40981e-35
415999	'FAM208A'	mRNA	1.06185	5.2568e-56
416003	'ASB14'	mRNA	3.42191	1.7358e-07
416004	'DNAH12'	mRNA	2.12785	1.50594e-10
416010	'IP6K2'	mRNA	1.00687	8.43399e-47
416036	'NTN4L'	mRNA	3.56776	9.57681e-05
416039	'XPC'	mRNA	1.01945	1.50019e-35
416043	'GRIP2'	mRNA	3.07026	2.82101e-28
416046	'SETD5'	mRNA	1.13897	2.18613e-105
416080	'ADAMTS9'	mRNA	1.18754	1.70985e-60
416102	'CHL1'	mRNA	1.73186	4.01228e-25
416108	'BHLHE40'	mRNA	1.57428	3.25018e-25
416115	'SRGAP3'	mRNA	1.16763	3.40854e-133
416148	'PPARGC1B'	mRNA	1.87219	1.10423e-21
416165	'MAT2B'	mRNA	1.19831	7.49038e-47
416169	'LOC416169'	mRNA	3.45228	0.000224954
416174	'GABRP'	mRNA	2.53029	6.1252e-05
416206	'CREBRF'	mRNA	1.37512	2.76723e-17
416214	'NSD1'	mRNA	1.42156	2.15829e-146
416244	'ADAM19'	mRNA	1.94533	1.14544e-06
416278	'HMGXB3'	mRNA	1.47549	2.30359e-78
416295	'CLK4'	mRNA	1.74591	5.28389e-82
416297	'FAM13B'	mRNA	1.02938	4.57596e-19
416324	'ACSL6'	mRNA	2.03023	1.01174e-64
416327	'SLC22A4'	mRNA	4.32002	5.87458e-15
416346	'SH3RF2'	mRNA	1.55874	6.40814e-14
416361	'GRK6'	mRNA	1.10138	5.02338e-27
416379	'EPG5'	mRNA	1.16329	1.85794e-27
416396	'SEC14L5'	mRNA	1.58404	4.40326e-23
416398	'UBN1'	mRNA	1.46394	1.2461e-55
416417	'SNX29'	mRNA	1.17334	2.08057e-17
416421	'MKL2'	mRNA	1.65632	2.9078e-92
416425	'PLA2G10'	mRNA	3.07508	2.19276e-53
416431	'USP42'	mRNA	1.4949	1.76493e-87
416454	'CYP2W2'	mRNA	1.70604	8.55802e-07
416479	'RADIL'	mRNA	1.37977	1.91188e-05
416482	'TNRC18'	mRNA	1.11542	5.05936e-271
416507	'RASD1'	mRNA	1.28923	2.57092e-29
416548	'SYNGR3'	mRNA	1.29837	2.87492e-07
416552	'TSC2'	mRNA	1.09658	1.3791e-127
416553	'PKD1'	mRNA	1.89007	2.61639e-68
416556	'CASKIN1'	mRNA	1.66174	3.67133e-40
416560	'E4F1'	mRNA	1.51955	2.48822e-72
416570	'TNRC6A'	mRNA	1.35308	5.77661e-188
416580	'USP31'	mRNA	2.1024	1.30645e-68
416593	'UNKL'	mRNA	2.06686	2.07964e-55
416595	'KIAA0430'	mRNA	1.21366	9.06509e-71
416600	'ABCC6'	mRNA	2.63709	5.05145e-37
416616	'VWA3A'	mRNA	1.86068	6.91867e-06
416618	'SDR42E2'	mRNA	2.18925	0.000167762
416624	'OTOA'	mRNA	2.82152	3.57155e-29
416650	'HBZ'	mRNA	2.90492	0
416651	'HBM'	mRNA	2.50194	0
416652	'HBA1'	mRNA	2.61677	0
416664	'ZKSCAN7L'	mRNA	1.99923	3.15215e-32
416665	'SLX4'	mRNA	1.20625	1.62717e-50
416667	'CREBBP'	mRNA	1.18998	2.51708e-141
416676	'STRIP2'	mRNA	1.16461	6.59472e-33
416691	'ASB13'	mRNA	1.13636	4.55737e-09
416696	'COL7A1L'	mRNA	2.39982	8.25792e-09
416699	'LRGUK'	mRNA	1.88362	2.40168e-07
416713	'TTBK1'	mRNA	2.22989	8.89007e-70
416730	'PLCB4'	mRNA	1.65582	7.1414e-19
416734	'PAK5'	mRNA	1.02383	0.000448628
416762	'CRAMP1'	mRNA	2.60983	1.89751e-55
416772	'PPM1F'	mRNA	1.25636	2.30524e-05
416800	'ULK1'	mRNA	1.64039	1.53995e-58
416802	'SFSWAP'	mRNA	2.37977	0
416811	'AACS'	mRNA	1.12797	2.69955e-48
416818	'DNAH10'	mRNA	2.85727	3.09501e-50
416820	'DDX55'	mRNA	1.1443	2.09233e-27
416829	'MPHOSPH9'	mRNA	1.40338	6.34694e-37
416830	'PITPNM2'	mRNA	1.13856	6.89621e-28
416834	'ABCB9'	mRNA	2.28686	2.84681e-20
416836	'HIP1R'	mRNA	1.04936	7.33468e-41
416862	'ZCCHC8'	mRNA	1.66788	6.5212e-101
416869	'PPTC7'	mRNA	1.18812	2.83051e-46
416875	'CUX2'	mRNA	2.13419	2.18687e-174
416884	'TRAFD1'	mRNA	1.45228	3.46379e-18
416887	'WSCD2'	mRNA	1.3948	1.4695e-34
416898	'FOXN4'	mRNA	2.56776	0.000931082
416916	'SLC2A11L5'	mRNA	1.30621	3.86756e-11
416919	'ZNRF3'	mRNA	1.18798	2.48357e-41
416957	'PRR14L'	mRNA	1.66379	2.15611e-86
416984	'CIT'	mRNA	1.20717	1.21276e-65
416989	'SRRM4'	mRNA	1.1203	1.00855e-05
416997	'POLE'	mRNA	1.13738	7.97942e-103
417002	'OSBP2'	mRNA	1.41022	4.80488e-40
417015	'MTMR3'	mRNA	1.25857	2.02082e-79
417033	'TPCN1'	mRNA	1.07221	1.27445e-43
417035	'BG8'	mRNA	1.88113	6.5925e-36
417089	'RALGPS1'	mRNA	1.00795	4.34066e-21
417097	'GOLGA1'	mRNA	2.05033	1.51941e-87
417107	'ZBTB26'	mRNA	1.05247	2.04085e-27
417108	'ZBTB6'	mRNA	1.37566	1.83862e-08
417109	'RC3H2'	mRNA	1.23003	1.15855e-58
417115	'TTLL11'	mRNA	1.0442	4.34876e-10
417117	'DAB2IP'	mRNA	1.53942	2.58751e-59
417121	'CNTRL'	mRNA	1.44131	1.83214e-63
417122	'C5'	mRNA	2.55423	2.15813e-11
417123	'TRAF1'	mRNA	1.47268	3.8423e-19
417127	'CAMSAP1'	mRNA	1.46369	2.39768e-75
417133	'SNAPC4'	mRNA	1.16959	2.69996e-46
417143	'RXRA'	mRNA	1.13941	2.27487e-42
417147	'ADAMTSL2'	mRNA	2.45914	3.28776e-42
417152	'ADAMTS13'	mRNA	2.45228	3.94369e-08
417166	'TSC1'	mRNA	1.02372	5.71479e-63
417170	'SETX'	mRNA	1.11897	2.43826e-87
417177	'PRRC2B'	mRNA	1.40807	0
417183	'PRDM12'	mRNA	2.39088	2.5335e-16
417188	'USP20'	mRNA	1.49398	4.17017e-68
417195	'CRAT'	mRNA	1.29433	1.85157e-30
417197	'SH3GLB2'	mRNA	1.94261	1.39814e-22
417202	'CCBL1'	mRNA	1.08823	5.17483e-21
417231	'COL27A1'	mRNA	2.27603	1.59943e-95
417245	'PAPPA'	mRNA	1.03665	3.77877e-35
417300	'ANKMY1'	mRNA	2.63286	2.74301e-08
417303	'ZNF302'	mRNA	1.39964	1.96173e-61
417314	'DNAH9'	mRNA	1.49614	1.51105e-09
417322	'CFAP52'	mRNA	2.28236	0.000588026
417335	'FN3K'	mRNA	2.65523	1.403e-24
417371	'UNK'	mRNA	1.28268	3.55511e-60
417374	'ITGB4'	mRNA	1.0483	5.7042e-06
417408	'ATAD5'	mRNA	1.23012	1.62498e-34
417411	'RHBDL3'	mRNA	1.94605	4.07603e-49
417414	'ERN1'	mRNA	1.33264	1.18486e-42
417419	'CEP95'	mRNA	1.15385	7.61493e-23
417433	'RGS9'	mRNA	2.05417	1.43471e-81
417469	'TSPOAP1'	mRNA	2.14687	1.20002e-31
417576	'NEK8'	mRNA	1.05092	1.43721e-19
417577	'TRAF4'	mRNA	1.30742	2.51825e-54
417586	'SSH2'	mRNA	1.27586	2.76523e-30
417587	'EFCAB5'	mRNA	2.59706	6.4388e-63
417598	'NCOR1'	mRNA	1.03504	2.74628e-84
417607	'SHPK'	mRNA	1.8901	1.53773e-18
417612	'AKAP10'	mRNA	1.08259	1.7154e-42
417625	'TEX14'	mRNA	3.32675	9.40534e-13
417632	'YPEL2'	mRNA	2.01826	9.68227e-36
417646	'USP32'	mRNA	1.18331	1.75844e-27
417658	'SYNRG'	mRNA	1.04035	5.53771e-74
417681	'KIAA0753'	mRNA	1.89507	2.62719e-119
417684	'PITPNM3'	mRNA	1.49117	5.68262e-20
417685	'FAM64A'	mRNA	1.39784	7.43997e-06
417692	'KIF21A'	mRNA	1.02237	3.3893e-33
417705	'HBP1'	mRNA	1.19085	4.62771e-33
417712	'KMT2E'	mRNA	2.43394	0
417724	'GSAP'	mRNA	1.05356	5.84668e-18
417728	'PHTF2'	mRNA	1.04584	2.44482e-25
417729	'MAGI2'	mRNA	1.71944	2.44466e-31
417747	'ZNF800'	mRNA	1.03291	1.70711e-10
417761	'CPED1'	mRNA	1.26786	2.69843e-06
417764	'ANKRD26'	mRNA	2.30271	1.80965e-65
417766	'CTTNBP2'	mRNA	1.74366	2.85925e-17
417772	'CAV2'	mRNA	1.48976	5.48708e-07
417776	'BMT2'	mRNA	1.14974	5.23673e-20
417779	'DOCK4'	mRNA	1.49591	8.72944e-25
417794	'ADAMTS20'	mRNA	3.06896	9.9505e-24
417796	'IRAK4'	mRNA	1.96493	6.14996e-17
417802	'ANO6'	mRNA	1.7867	1.95812e-12
417804	'ARID2'	mRNA	1.01089	1.47789e-33
417818	'MON2'	mRNA	1.1822	7.44712e-37
417836	'HELB'	mRNA	1.62358	5.1383e-31
417853	'PTPRB'	mRNA	1.82571	1.0552e-22
417855	'ZFC3H1'	mRNA	3.03288	6.84002e-202
417869	'NAV3'	mRNA	1.18183	6.18984e-08
417877	'PPFIA2'	mRNA	3.22487	2.12893e-06
417881	'SLC6A15'	mRNA	1.08279	1.4448e-49
417887	'CEP290'	mRNA	1.49574	4.97835e-35
417896	'EEA1'	mRNA	1.37658	7.65491e-87
417908	'FGD6'	mRNA	1.44899	4.7773e-43
417921	'CFAP54'	mRNA	1.73406	7.33834e-09
417931	'GAS2L3'	mRNA	1.52955	5.05493e-35
417937	'LOC417937'	mRNA	1.45228	0.000542197
417985	'MEI1'	mRNA	1.47876	0.000803933
417992	'TOB2'	mRNA	1.27613	8.66658e-50
418000	'EP300'	mRNA	1.36938	5.34875e-145
418054	'FOXRED2'	mRNA	1.39352	5.21603e-20
418070	'RFX4'	mRNA	2.00796	4.84822e-64
418083	'HCFC2'	mRNA	2.84938	1.52154e-165
418109	'CGTL'	mRNA	2.60983	1.89751e-55
418110	'KDM7A'	mRNA	1.10764	7.24017e-43
418126	'CHRM2'	mRNA	1.39278	9.90225e-10
418129	'SYT10'	mRNA	1.93033	1.41721e-09
418136	'KIAA1551'	mRNA	1.15192	1.39089e-98
418139	'DENND5B'	mRNA	1.18006	7.60668e-45
418141	'CAPRIN2'	mRNA	1.74694	2.57978e-42
418161	'CECR2'	mRNA	1.00045	1.66579e-27
418164	'MICAL3'	mRNA	1.30727	1.38026e-82
418179	'LMO3'	mRNA	1.3079	0.000315368
418206	'CASC1'	mRNA	2.15683	1.83696e-08
418225	'TTLL1'	mRNA	1.77626	7.30537e-24
418228	'SCUBE1'	mRNA	1.38834	8.84174e-46
418247	'PFKFB3'	mRNA	2.30803	1.84126e-95
418254	'A2ML1'	mRNA	2.01707	3.5113e-24
418273	'VAMP1'	mRNA	2.57428	6.66747e-24
418306	'KEL'	mRNA	4.03725	0.000779423
418315	'SPAG17'	mRNA	1.47876	0.000803933
418320	'USF3'	mRNA	2.77986	1.22638e-29
418326	'POLQ'	mRNA	2.2232	5.61631e-94
418336	'SLC22A15'	mRNA	2.27104	2.11695e-12
418346	'IGSF11'	mRNA	1.36209	1.49722e-06
418352	'CCDC191'	mRNA	1.21086	6.24113e-11
418353	'ZDHHC23'	mRNA	1.04953	5.77846e-08
418359	'CFAP44'	mRNA	2.34845	1.64656e-13
418361	'BOC'	mRNA	1.17509	5.51248e-75
418364	'NEPRO'	mRNA	1.14008	1.20369e-31
418378	'COL8A1'	mRNA	1.44451	8.18503e-19
418380	'TMEM30CP'	mRNA	3.28062	3.11902e-37
418393	'IMPG2'	mRNA	3.14531	2.51828e-13
418404	'NFKBIZ'	mRNA	1.31135	3.66653e-16
418407	'BBX'	mRNA	1.06063	1.04084e-37
418412	'TRAT1'	mRNA	4.03725	0.000779423
418437	'CRYBG3'	mRNA	1.08342	2.43324e-24
418450	'CD101'	mRNA	1.86732	1.61529e-10
418468	'ABCC13'	mRNA	1.54915	2.66616e-09
418482	'LTN1'	mRNA	1.32861	1.99233e-66
418498	'SYNJ1'	mRNA	2.30473	6.69554e-54
418511	'SETD4'	mRNA	1.03725	3.09453e-06
418518	'TTC3'	mRNA	1.67625	4.06452e-110
418531	'PRDM15'	mRNA	1.4146	4.52313e-50
418556	'KDM6A'	mRNA	1.52561	3.08263e-118
418561	'MAOB'	mRNA	1.45228	0.000542197
418563	'MAOA'	mRNA	1.62597	1.02529e-55
418574	'BCOR'	mRNA	1.63784	2.22531e-94
418578	'RPGR'	mRNA	1.49614	1.51105e-09
418583	'C1HXORF59'	mRNA	1.72792	1.08681e-09
418596	'ZFX'	mRNA	1.04241	3.82883e-57
418616	'NHS'	mRNA	1.3903	1.47501e-56
418640	'FRMPD4'	mRNA	1.11125	7.59398e-07
418646	'DMTF1'	mRNA	1.75866	1.77241e-68
418653	'PNPLA4'	mRNA	2.36982	0.000279969
418657	'MXRA5'	mRNA	1.14757	5.51891e-49
418671	'STAGL'	mRNA	1.0442	6.31357e-34
418682	'HERC2'	mRNA	1.5103	3.07085e-211
418685	'ATP10A'	mRNA	1.19449	5.69085e-11
418703	'REV1'	mRNA	1.16849	3.11866e-27
418716	'IL1RL2'	mRNA	1.58721	2.7597e-07
418724	'TGFBRAP1'	mRNA	1.65159	5.88499e-30
418731	'SH3RF3'	mRNA	2.84133	1.13665e-13
418734	'UPF3A'	mRNA	2.165	4.63532e-06
418748	'MCF2L'	mRNA	1.44603	3.82795e-23
418760	'ANKRD10'	mRNA	1.94005	1.58721e-135
418764	'LIG4'	mRNA	1.08575	1.54978e-08
418805	'RNF219'	mRNA	1.11849	1.62385e-65
418807	'SLAIN1'	mRNA	1.32675	3.86141e-07
418832	'NAA16'	mRNA	1.03007	4.71027e-46
418833	'RGCC'	mRNA	1.08971	9.23275e-13
418835	'AKAP11'	mRNA	1.25598	3.10282e-35
418846	'COG3'	mRNA	1.49299	2.06116e-62
418855	'LRCH1'	mRNA	1.38919	2.81014e-20
418861	'RCBTB2'	mRNA	1.0373	2.28684e-24
418864	'CDADC1'	mRNA	1.14486	1.85177e-06
418876	'INTS6'	mRNA	1.92508	1.30761e-92
418903	'DCLK1'	mRNA	1.37129	1.13506e-15
418912	'N4BP2L2'	mRNA	1.08206	1.438e-12
418915	'FRY'	mRNA	1.27483	1.12262e-08
418935	'RNF6'	mRNA	1.98042	8.15258e-122
418939	'AMER2'	mRNA	1.41035	2.50972e-18
418940	'SPATA13'	mRNA	1.07574	3.83594e-69
418944	'SACS'	mRNA	1.14249	1.92563e-49
418949	'LATS2'	mRNA	1.04035	4.64814e-21
418963	'ZC3H12C'	mRNA	1.08971	5.00806e-08
418967	'NPAT'	mRNA	1.5014	1.80135e-49
418976	'KBTBD3'	mRNA	1.84133	1.39705e-08
419002	'TAF1D'	mRNA	2.79874	4.28904e-241
419021	'PCF11'	mRNA	2.31042	0
419027	'GAB2'	mRNA	1.70798	1.64011e-46
419035	'FRMD4A'	mRNA	1.21117	2.30091e-78
419073	'DCHS1'	mRNA	1.09543	3.67126e-48
419079	'HBBR'	mRNA	2.78705	0
419080	'LOC419080'	mRNA	1.89707	0.000145903
419084	'GDPD4'	mRNA	1.13581	8.81605e-24
419085	'MYO7A'	mRNA	1.19905	5.0867e-17
419091	'UVRAG'	mRNA	1.48167	9.71876e-26
419115	'L3MBTL1'	mRNA	3.81825	4.51372e-260
419121	'GGT7'	mRNA	1.4296	1.31406e-10
419122	'NCOA6'	mRNA	1.10426	6.14862e-70
419126	'RBL1'	mRNA	1.23816	1.27505e-176
419127	'CHD6'	mRNA	1.33483	4.15764e-153
419138	'CEP250'	mRNA	1.65392	1.62685e-89
419170	'PPP1R16B'	mRNA	1.39216	6.96789e-14
419189	'PABPC1L'	mRNA	2.53266	1.40414e-21
419198	'HNF4A'	mRNA	1.53029	0.000453152
419208	'NCOA3'	mRNA	1.59189	3.06748e-69
419211	'ARFGEF2'	mRNA	1.13672	1.57266e-29
419216	'EPB42'	mRNA	4.35918	2.86634e-08
419220	'PPP1R3D'	mRNA	1.43886	3.27232e-06
419223	'TAF4'	mRNA	1.60171	3.26075e-32
419225	'SS18L1'	mRNA	1.0442	0.000436509
419231	'SLCO4A1'	mRNA	2.44301	3.9703e-16
419249	'MYT1'	mRNA	2.28236	0.000588026
419255	'UCKL1'	mRNA	1.80592	2.4002e-22
419262	'RTEL1'	mRNA	1.27529	7.71027e-79
419264	'GMEB2'	mRNA	1.05755	1.36505e-33
419265	'HELZ2'	mRNA	2.89286	5.49868e-54
419289	'BPIFB3'	mRNA	2.18925	1.05139e-14
419316	'APCDD1L'	mRNA	1.73239	7.92158e-14
419318	'RAB22A'	mRNA	1.35992	1.08875e-11
419336	'DOK5'	mRNA	1.05477	1.71942e-26
419345	'ATP9A'	mRNA	1.48881	4.36021e-41
419347	'KCNG1'	mRNA	1.83695	0.000281864
419350	'ADNP'	mRNA	1.25826	0
419360	'ARHGEF10L'	mRNA	1.51044	1.67306e-126
419363	'SLC45A1'	mRNA	2.68806	5.35364e-176
419366	'PER3'	mRNA	1.82556	6.70082e-49
419388	'PRDM16'	mRNA	1.15385	1.47038e-06
419390	'LOC419390'	mRNA	1.56122	1.03316e-24
419392	'HES5'	mRNA	3.34352	2.3792e-104
419400	'CFAP74'	mRNA	1.49535	0.000156776
419403	'NADK'	mRNA	1.04772	3.50314e-34
419407	'MMP23B'	mRNA	1.74179	0.000739789
419416	'DVL1'	mRNA	1.53554	1.07153e-34
419419	'PUSL1'	mRNA	1.48524	5.39634e-32
419420	'ACAP3'	mRNA	2.02165	2.18439e-43
419444	'PIK3CD'	mRNA	1.94008	7.59271e-19
419452	'CASZ1'	mRNA	3.11525	4.60326e-20
419460	'SPEN'	mRNA	1.09603	3.76498e-155
419466	'ATP13A2'	mRNA	2.28143	0
419476	'TMCO4'	mRNA	1.11125	7.59398e-07
419481	'VPS13D'	mRNA	1.13795	1.50003e-47
419488	'CLCN6'	mRNA	1.2341	7.41862e-27
419497	'DISP3'	mRNA	1.36213	6.65617e-48
419505	'ZBTB40'	mRNA	2.24404	2.89045e-29
419508	'CCDC30'	mRNA	1.14198	6.12561e-40
419520	'SLC23A2'	mRNA	1.46717	4.30029e-09
419530	'SLC25A37'	mRNA	1.20311	1.68608e-27
419533	'LOXL2'	mRNA	1.04497	5.6689e-20
419539	'LRRTM4'	mRNA	1.86732	0.000738145
419542	'ARID1A'	mRNA	1.2224	2.91484e-219
419592	'RSRP1'	mRNA	1.80162	4.81319e-111
419596	'NCMAP'	mRNA	1.06794	1.27856e-09
419604	'PDIK1L'	mRNA	3.76745	1.03879e-95
419640	'CSMD2'	mRNA	2.24759	1.57815e-58
419643	'KCNQ4'	mRNA	1.25964	5.23928e-06
419646	'IQCC'	mRNA	2.00609	1.66525e-18
419671	'MACF1'	mRNA	1.27874	0
419724	'ARHGAP32'	mRNA	1.03369	6.1816e-104
419729	'PRDM10'	mRNA	2.80872	2.14449e-112
419734	'SNX19'	mRNA	1.35389	1.05707e-55
419752	'ARHGEF12'	mRNA	1.0508	2.95871e-36
419757	'TTC36'	mRNA	1.25939	3.22506e-51
419759	'ZBTB32'	mRNA	1.13454	1.64473e-21
419764	'SIK3'	mRNA	1.04865	3.86166e-23
419769	'CEP164'	mRNA	1.37211	4.60899e-66
419798	'DIXDC1'	mRNA	1.21719	1.88422e-42
419805	'SLC6A17'	mRNA	1.83695	0.000281864
419812	'C26H6ORF222'	mRNA	3.56776	9.57681e-05
419821	'PLEKHA6'	mRNA	2.15557	1.89884e-64
419823	'MDM4'	mRNA	1.34867	2.60228e-211
419824	'NFASC'	mRNA	1.05141	2.08669e-23
419832	'ELK4'	mRNA	1.46227	1.99041e-43
419850	'PFKFB2'	mRNA	2.52337	7.89708e-43
419851	'LOC419851'	mRNA	3.98626	4.32627e-22
419870	'CTTNBP2NL'	mRNA	1.0873	6.74111e-56
419878	'PHTF1'	mRNA	1.31928	1.8165e-149
419879	'AP4B1'	mRNA	1.51551	1.8201e-82
419896	'SCUBE3'	mRNA	1.59627	5.74695e-137
419898	'ANKS1A'	mRNA	1.30626	1.19365e-52
419900	'UHRF1BP1'	mRNA	2.11197	3.09175e-197
419914	'TSPO2'	mRNA	1.01018	2.20567e-33
419922	'TFEB'	mRNA	1.01912	6.24424e-23
419923	'FRS3'	mRNA	1.64709	4.35979e-106
419925	'USP49'	mRNA	1.13626	3.88396e-30
419932	'BTG2'	mRNA	1.18578	2.41916e-103
419951	'TANC2'	mRNA	1.044	2.59946e-56
419964	'MAP3K14'	mRNA	2.00042	2.14665e-65
419967	'DCAKD'	mRNA	1.0226	0.000813927
419969	'GFAP'	mRNA	3.32675	6.09906e-07
419985	'MPP3'	mRNA	2.56776	4.6086e-25
419988	'ABI3'	mRNA	1.20075	1.19354e-05
419995	'MLLT6'	mRNA	2.28323	1.26573e-50
420023	'EZH1'	mRNA	1.93721	8.26914e-84
420030	'ZNF862L'	mRNA	1.08253	2.19893e-17
420033	'KLHL10'	mRNA	2.56776	0.000931082
420070	'TJP3'	mRNA	1.4951	6.34861e-27
420078	'DOT1L'	mRNA	1.23613	6.14782e-153
420082	'MEX3D'	mRNA	1.36519	9.92304e-57
420092	'RFX2'	mRNA	1.25864	3.91724e-29
420104	'SBNO2'	mRNA	1.80638	7.81708e-70
420120	'COMP'	mRNA	2.48203	8.69e-11
420130	'MAST3'	mRNA	1.43815	4.16407e-54
420135	'MYO9B'	mRNA	1.02071	1.85903e-39
420148	'KLF2'	mRNA	2.18925	6.38705e-08
420169	'CSPP1'	mRNA	2.23146	2.76164e-58
420176	'NCOA2'	mRNA	1.12441	1.3675e-35
420212	'WWP1'	mRNA	1.01116	9.04053e-20
420216	'SLC7AL'	mRNA	3.30028	2.67657e-15
420235	'C2H8ORF37'	mRNA	1.19325	5.58319e-14
420249	'SPAG1'	mRNA	1.62535	1.13506e-07
420264	'RIMS2'	mRNA	1.1711	0.000793032
420271	'RSPO2'	mRNA	2.49181	8.97317e-05
420289	'TRPS1'	mRNA	1.35816	2.27704e-24
420315	'COL22A1'	mRNA	1.18608	3.90404e-17
420319	'ZFAT'	mRNA	2.27171	4.14352e-17
420325	'KCNQ3'	mRNA	1.63286	5.2614e-05
420336	'MTSS1'	mRNA	1.10611	2.79979e-38
420346	'ATAD2'	mRNA	1.10583	5.4141e-54
420347	'ZHX1'	mRNA	1.82101	4.53155e-48
420370	'ZNF746'	mRNA	1.32182	1.49306e-31
420388	'NKTR'	mRNA	1.94475	3.99353e-304
420392	'CCDC13'	mRNA	1.01923	6.88899e-05
420399	'SNAP47'	mRNA	1.04718	3.06344e-24
420404	'SETD2'	mRNA	1.04398	1.13793e-201
420437	'KMT2C'	mRNA	2.12745	1.07941e-195
420441	'PAXIP1'	mRNA	1.36049	6.83242e-55
420444	'RBM33'	mRNA	1.15921	9.59613e-95
420449	'PTPRN2'	mRNA	1.01181	1.11193e-41
420452	'WDR60'	mRNA	1.10339	1.91905e-14
420455	'ZMYND11'	mRNA	1.01028	4.19936e-37
420456	'DIP2C'	mRNA	1.74179	8.24032e-22
420471	'EPC1'	mRNA	1.61236	5.31199e-122
420474	'ZNF438'	mRNA	1.63109	4.78675e-29
420486	'LOC420486'	mRNA	2.1392	4.2899e-09
420491	'xcc-b100_1894L'	mRNA	1.2172	2.37377e-18
420494	'MYO3A'	mRNA	1.20436	1.56373e-11
420500	'ARHGAP21'	mRNA	1.64846	2.85426e-140
420542	'CFAP69'	mRNA	1.04065	3.49872e-07
420552	'LOC420552'	mRNA	2.80143	3.74471e-13
420555	'RBM48'	mRNA	1.1522	8.89336e-13
420565	'CASD1'	mRNA	1.01774	2.38924e-23
420587	'VWDE'	mRNA	1.0785	1.08734e-105
420673	'ABHD5'	mRNA	1.77421	8.08594e-10
420675	'SNRK'	mRNA	1.17225	4.87072e-39
420690	'NPHP3'	mRNA	1.9215	2.75358e-30
420717	'SLC25A38'	mRNA	1.30753	4.46971e-24
420721	'SUSD5'	mRNA	1.14034	6.85742e-07
420722	'FBXL2'	mRNA	1.29309	3.56613e-30
420757	'ITGA9'	mRNA	1.0615	4.29296e-09
420758	'GOLGA4'	mRNA	1.48893	6.32831e-47
420766	'CDK13'	mRNA	1.14034	4.19954e-48
420774	'HECW1'	mRNA	1.06526	2.19377e-10
420805	'ADNP2'	mRNA	1.00507	1.44146e-65
420821	'DCDC2'	mRNA	1.03725	1.13148e-14
420827	'RNF144B'	mRNA	3.97585	1.59396e-11
420829	'KDM1B'	mRNA	1.48976	5.48708e-07
420832	'KIF13A'	mRNA	1.88655	9.09567e-107
420839	'JARID2'	mRNA	1.11248	1.51662e-75
420842	'GMPR'	mRNA	1.08832	1.0073e-11
420905	'ZCCHC2'	mRNA	1.21817	3.36725e-62
420919	'TRIO'	mRNA	1.12562	5.63196e-78
420921	'DNAH5'	mRNA	2.39982	8.25792e-09
420927	'MARCH6'	mRNA	1.62247	1.62504e-79
420949	'COBL'	mRNA	1.24078	1.96395e-05
420961	'FRRS1L'	mRNA	1.7476	1.45614e-58
420965	'PCBP2'	mRNA	1.64493	2.52019e-23
420996	'NR4A3'	mRNA	1.03725	4.70449e-09
421008	'ZNF236'	mRNA	1.46921	9.94458e-35
421023	'RTTN'	mRNA	2.61486	1.43307e-72
421031	'MPPE1'	mRNA	1.1224	2.67177e-09
421039	'CEP76'	mRNA	1.18898	3.28484e-27
421043	'CEP192'	mRNA	1.19484	5.8102e-38
421052	'PIEZO2'	mRNA	1.11924	6.04355e-07
421100	'KLHL14'	mRNA	1.13267	3.28903e-05
421115	'ST18'	mRNA	4.11525	0.000505927
421140	'CHD7'	mRNA	1.03517	4.81585e-158
421155	'PPFIA4'	mRNA	1.33199	5.80017e-07
421172	'ZC3H11A'	mRNA	1.7937	1.20083e-244
421178	'KIF21B'	mRNA	1.40651	1.9111e-136
421193	'USP34'	mRNA	1.56991	3.93106e-128
421196	'KIAA1841'	mRNA	1.1269	4.27345e-12
421210	'CCDC88A'	mRNA	1.47545	1.12627e-84
421215	'EML6'	mRNA	1.12785	1.29432e-08
421218	'PSME4'	mRNA	1.04498	2.29307e-84
421231	'NAPB'	mRNA	2.21479	1.23105e-25
421232	'LOC421232'	mRNA	2.05475	7.64909e-07
421233	'GZF1'	mRNA	1.29368	1.93243e-51
421237	'KIZ'	mRNA	1.17644	2.60269e-32
421240	'RALGAPA2'	mRNA	1.31842	1.18135e-65
421258	'CUL9'	mRNA	1.46844	9.85473e-117
421276	'SERTAD2'	mRNA	1.01664	1.3841e-12
421287	'PPP1R21'	mRNA	1.29694	4.74805e-36
421296	'FAM179A'	mRNA	1.39088	2.55176e-06
421297	'ALK'	mRNA	1.28765	9.20561e-05
421311	'GPCPD1'	mRNA	1.31604	2.44147e-87
421312	'CHGB'	mRNA	1.81907	1.07271e-20
421314	'MCM8'	mRNA	1.16737	1.40129e-32
421343	'RAB3GAP2'	mRNA	1.07748	3.464e-47
421349	'SLC30A10'	mRNA	2.57977	4.4246e-63
421431	'MDGA1'	mRNA	1.5194	1.17688e-05
421457	'ZNF318'	mRNA	1.03801	1.5088e-54
421487	'CNST'	mRNA	2.51392	1.23842e-53
421499	'CEP170'	mRNA	1.42144	2.66341e-72
421508	'RYR2'	mRNA	2.18925	6.38705e-08
421517	'TARBP1'	mRNA	1.13621	1.29778e-33
421574	'PDE10A'	mRNA	1.09069	8.1207e-47
421579	'MAP3K4'	mRNA	1.06097	1.6252e-43
421593	'DEPDC7'	mRNA	1.1601	3.9647e-06
421597	'HIPK3'	mRNA	1.04821	1.81567e-19
421601	'CCDC73'	mRNA	1.59524	0.000492678
421640	'SYNE1'	mRNA	1.77421	4.69152e-30
421642	'FBXO5'	mRNA	1.12606	1.06603e-33
421644	'OPRM1'	mRNA	1.15683	4.29294e-07
421650	'ARID1B'	mRNA	1.19227	3.65856e-137
421672	'HIVEP2'	mRNA	1.0872	5.51543e-07
421680	'NHSL1'	mRNA	1.09994	7.59411e-100
421681	'ARFGEF3'	mRNA	1.16688	6.64269e-21
421689	'MAP7'	mRNA	1.10833	2.34495e-09
421713	'SOGA3'	mRNA	2.96184	1.83287e-25
421725	'TBC1D32'	mRNA	1.79015	6.61871e-19
421737	'RFX6'	mRNA	2.97883	1.37974e-15
421750	'TUBE1'	mRNA	2.69086	5.42388e-59
421770	'AFG1L'	mRNA	1.0395	2.99954e-10
421796	'PNISR'	mRNA	1.37615	2.32432e-190
421798	'FBXL4'	mRNA	1.05402	3.24403e-11
421799	'MMS22L'	mRNA	1.32307	1.15221e-25
421810	'CASP8AP2'	mRNA	1.38719	3.63666e-36
421813	'ANKRD6'	mRNA	1.11418	7.0436e-12
421828	'ZNF292'	mRNA	1.24376	1.41219e-64
421835	'CEP162'	mRNA	1.86485	3.11971e-41
421842	'DOPEY1'	mRNA	1.42711	1.91397e-30
421866	'KCNQ5'	mRNA	1.76544	2.29213e-06
421867	'RIMS1'	mRNA	1.42191	8.09076e-32
421873	'COL19A1'	mRNA	1.43367	2.0517e-08
421884	'DST'	mRNA	1.11925	2.37655e-59
421972	'ATAD2B'	mRNA	1.0568	1.53101e-31
421993	'ASXL2'	mRNA	1.18925	6.76047e-29
422000	'C3H8ORF80'	mRNA	2.11525	0.000343032
422017	'ZNF395'	mRNA	1.19583	9.99447e-72
422042	'PAQR8'	mRNA	1.07924	3.23349e-12
422044	'PKHD1'	mRNA	1.65282	9.21509e-09
422069	'MTR'	mRNA	1.36482	2.22402e-26
422075	'ST6GALNAC2L'	mRNA	2.62631	1.3715e-19
422076	'AATK'	mRNA	1.79369	3.41177e-52
422084	'CBX8'	mRNA	1.74439	1.10657e-47
422095	'SPAG9'	mRNA	1.11429	2.43723e-97
422099	'ABCC3'	mRNA	1.29418	3.05731e-123
422121	'GGA3'	mRNA	1.50087	1.95485e-103
422123	'SLC25A19'	mRNA	1.02652	9.74065e-07
422125	'CASKIN2'	mRNA	1.10867	1.94825e-37
422127	'LLGL2'	mRNA	1.12904	1.38556e-38
422151	'FNDC3AL'	mRNA	1.03532	7.40785e-107
422154	'PCTPL'	mRNA	1.38161	5.16257e-05
422162	'OPHN1'	mRNA	1.21184	5.23672e-102
422166	'EDA2R'	mRNA	1.88362	2.40168e-07
422175	'ZC3H12B'	mRNA	2.11822	4.57103e-80
422203	'OGT'	mRNA	2.14181	0
422209	'ZMYM3'	mRNA	1.94982	7.26041e-171
422210	'MED12'	mRNA	1.08179	4.71656e-104
422215	'TEX11'	mRNA	1.31312	3.38108e-14
422220	'LRCH2'	mRNA	1.3918	1.35936e-53
422239	'INTS6L'	mRNA	1.9223	8.96197e-151
422242	'MAP7D3'	mRNA	1.35539	5.11766e-96
422253	'MCF2'	mRNA	2.24429	3.9902e-50
422269	'ZNF711'	mRNA	1.55639	3.71158e-119
422273	'RPS6KA6'	mRNA	1.79543	1.24545e-90
422281	'BRWD3'	mRNA	1.53475	4.05864e-80
422304	'LOC422304'	mRNA	2.00483	0.000191407
422323	'WASF3L'	mRNA	1.58353	3.65803e-06
422361	'THOC2'	mRNA	1.50019	1.18817e-219
422372	'LOC422372'	mRNA	1.15683	1.45445e-11
422375	'LONRF3'	mRNA	1.72346	2.86795e-25
422381	'C4HCXorf57'	mRNA	2.19378	1.88881e-53
422383	'TBC1D8B'	mRNA	1.33751	3.73876e-21
422384	'PASD1'	mRNA	1.93341	8.05124e-11
422406	'MAP9'	mRNA	1.82668	5.55575e-62
422418	'RAPGEF2'	mRNA	1.22839	5.2924e-47
422445	'MAML3'	mRNA	1.25689	1.3251e-46
422448	'MGAT4D'	mRNA	2.53029	6.1252e-05
422465	'ZNF827'	mRNA	1.95479	7.36798e-76
422478	'SH3D19'	mRNA	1.19187	1.07558e-20
422500	'LARP1B'	mRNA	1.15613	1.96325e-24
422502	'JADE1'	mRNA	1.68373	1.28714e-22
422512	'CCNG2'	mRNA	1.15592	3.71546e-108
422528	'CYP2U1'	mRNA	1.33735	7.48442e-10
422540	'TET2'	mRNA	2.06393	2.84133e-91
422544	'SNX25'	mRNA	1.1746	3.90176e-18
422581	'BMP3'	mRNA	1.03266	1.52378e-05
422585	'PKD2'	mRNA	1.1999	3.79598e-40
422589	'KLHL8'	mRNA	1.00819	4.13269e-15
422590	'AFF1'	mRNA	1.2115	6.72197e-75
422595	'LIN54'	mRNA	1.34537	2.92877e-46
422596	'THAP9'	mRNA	1.23369	2.64949e-70
422609	'AGPAT9L'	mRNA	2.45228	4.0112e-15
422613	'WDFY3'	mRNA	1.35513	1.52791e-132
422614	'PPM1K'	mRNA	1.01647	1.03308e-25
422630	'PPP1R3B'	mRNA	1.0219	1.72163e-11
422649	'SLC4A4'	mRNA	1.36114	3.43239e-13
422652	'AFP'	mRNA	3.39088	0.000343815
422666	'NUDT6'	mRNA	1.37285	3.57516e-08
422670	'KIAA1109'	mRNA	1.29106	2.45855e-61
422689	'ANK2'	mRNA	1.01237	1.11524e-13
422709	'MTTP'	mRNA	2.65392	1.85795e-08
422716	'CENPE'	mRNA	1.04392	1.66774e-72
422719	'SORBS2'	mRNA	1.48623	1.03142e-09
422730	'SLC7A2'	mRNA	1.30973	5.20035e-15
422731	'MTMR7'	mRNA	1.63286	9.42686e-15
422736	'MICU3'	mRNA	1.73302	6.41707e-42
422742	'LONRF1'	mRNA	1.68091	5.71787e-15
422746	'CEP135'	mRNA	1.23372	2.30904e-23
422752	'LNX1'	mRNA	1.19713	2.92212e-14
422756	'RASL11B'	mRNA	1.22487	2.42986e-16
422765	'FRYL'	mRNA	1.10257	3.05053e-55
422806	'ZCCHC4'	mRNA	2.28174	4.28598e-24
422809	'LGI2'	mRNA	1.00639	4.01485e-06
422820	'LCORL'	mRNA	1.0462	2.00548e-17
422838	'BOD1L1'	mRNA	1.52841	2.99716e-107
422847	'ZBTB49'	mRNA	1.67468	2.86344e-27
422860	'KIAA0232'	mRNA	1.70646	3.93307e-82
422878	'HTT'	mRNA	1.99787	4.53817e-173
422901	'LOC422901'	mRNA	1.30933	8.00618e-25
422945	'C4H20ORF194'	mRNA	2.68183	0
422949	'ALMS1'	mRNA	1.13848	1.86861e-90
422952	'RAB11FIP5'	mRNA	2.12302	7.44681e-62
422976	'DBX1'	mRNA	1.78789	3.10458e-25
422977	'NAV2'	mRNA	1.36922	5.64368e-71
423010	'BAHD1'	mRNA	1.00483	1.96899e-09
423014	'PLCB2'	mRNA	1.01416	3.2523e-06
423049	'SCUBE2'	mRNA	1.80554	1.39338e-180
423050	'NRIP3'	mRNA	1.31663	0.000475934
423056	'TRIM66'	mRNA	1.95031	6.61744e-13
423072	'ABCC8'	mRNA	1.3957	2.40527e-11
423075	'OTOG'	mRNA	2.66434	6.04108e-16
423079	'gene-HPS5'	mRNA	3.45228	0.000224954
423085	'PTPN5'	mRNA	1.02652	7.48653e-05
423106	'CRACR2B'	mRNA	1.26725	7.88475e-05
423112	'CHKA'	mRNA	1.26593	4.8475e-84
423138	'INCENPL'	mRNA	1.6625	4.60369e-08
423144	'ANO1'	mRNA	2.76214	1.8618e-27
423156	'SLC1A2'	mRNA	1.21622	8.18533e-31
423163	'TRAF6'	mRNA	1.00324	8.90921e-16
423167	'TTC17'	mRNA	1.48943	9.38381e-82
423189	'LRP4'	mRNA	1.21627	5.37264e-90
423210	'INO80'	mRNA	1.50626	1.25055e-60
423216	'LTK'	mRNA	1.1546	7.37042e-11
423220	'MGA'	mRNA	1.16849	4.82018e-96
423230	'VPS39'	mRNA	1.13711	7.04608e-33
423238	'STARD9'	mRNA	2.51118	4.3786e-21
423239	'CDAN1'	mRNA	1.20999	7.31297e-42
423245	'ELMSAN1'	mRNA	1.64988	1.2545e-44
423246	'DNAL1'	mRNA	1.14345	2.79118e-06
423250	'RBM25'	mRNA	1.417	2.14123e-258
423260	'PLEKHD1'	mRNA	3.29731	1.55689e-26
423270	'PLEKHH1'	mRNA	1.90375	1.13234e-26
423276	'ZFYVE26'	mRNA	1.48203	7.02416e-28
423286	'FSIP1'	mRNA	1.73239	0.000280413
423305	'G2E3'	mRNA	1.02669	5.64476e-79
423311	'HEATR5A'	mRNA	1.33939	9.63164e-38
423316	'EGLN3'	mRNA	1.2131	4.77036e-10
423327	'RALGAPA1'	mRNA	1.00845	8.6434e-51
423333	'TTC6'	mRNA	1.13741	0.000841939
423400	'EML5'	mRNA	2.22487	0.000116965
423410	'CCDC88C'	mRNA	1.08142	4.34295e-131
423414	'TRIP11'	mRNA	1.29468	2.19964e-34
423424	'BTBD7'	mRNA	1.1255	7.18481e-55
423426	'UNC79'	mRNA	2.94553	7.71874e-93
423427	'FAM181A'	mRNA	1.26193	1.22943e-25
423430	'PPP4R4'	mRNA	1.73522	1.12815e-05
423437	'DICER1'	mRNA	1.47398	1.07903e-40
423441	'ATG2B'	mRNA	1.82633	2.69432e-31
423452	'EML1'	mRNA	1.13131	1.97785e-29
423456	'SLC25A29'	mRNA	1.50131	1.68715e-43
423464	'WDR20'	mRNA	1.30028	2.5176e-14
423466	'ZNF839'	mRNA	1.69211	3.55844e-41
423471	'TRAF3'	mRNA	1.57855	2.27332e-30
423484	'KLC1'	mRNA	1.07601	1.58049e-29
423494	'CEP170B'	mRNA	1.48229	1.49635e-172
423509	'SYNE2'	mRNA	1.00504	1.17896e-112
423514	'KCNH5'	mRNA	2.29486	2.03748e-77
423516	'SYT16'	mRNA	1.0274	2.97673e-07
423528	'PCNX4'	mRNA	1.27662	1.86492e-37
423541	'ARID4A'	mRNA	1.45873	1.24713e-44
423568	'KLHDC1'	mRNA	1.40723	5.2009e-43
423575	'CDKL1'	mRNA	1.05827	3.1143e-08
423593	'MIS18BP1'	mRNA	1.31471	1.33737e-82
423595	'FAM179B'	mRNA	1.03017	4.73839e-41
423604	'BICC1'	mRNA	1.10309	1.62073e-21
423631	'RASGEF1A'	mRNA	1.75895	4.26452e-10
423644	'PCDH15'	mRNA	1.65933	4.42227e-12
423647	'DNAJC12'	mRNA	1.90519	1.80776e-28
423655	'JMJD1C'	mRNA	1.64476	1.252e-144
423703	'NUDT13'	mRNA	1.06746	7.15772e-07
423712	'ADAMTS14'	mRNA	1.22785	6.15451e-35
423727	'POLR3A'	mRNA	1.54363	1.75644e-35
423728	'DLG5'	mRNA	1.20075	1.8699e-64
423734	'KAT6B'	mRNA	1.0022	1.47778e-30
423740	'NTL'	mRNA	2.75648	3.02475e-81
423772	'WASHC2C'	mRNA	1.08277	1.531e-51
423785	'ERCC6'	mRNA	1.09339	1.32899e-41
423796	'PCGF5'	mRNA	2.28765	2.0142e-17
423817	'BTAF1'	mRNA	1.19516	6.48841e-71
423818	'DUSP11RC1I'	mRNA	1.65437	4.13277e-38
423824	'KNDC1'	mRNA	2.01707	1.48523e-06
423828	'ABCC2'	mRNA	1.67468	2.8641e-05
423833	'CNNM1'	mRNA	1.21449	1.82833e-07
423847	'LCOR'	mRNA	1.18085	5.24953e-43
423876	'SH3PXD2A'	mRNA	1.408	1.17718e-55
423879	'CFAP43'	mRNA	1.27171	9.40776e-12
423890	'DUSP5'	mRNA	1.54928	2.30007e-48
423905	'CCDC186'	mRNA	1.0134	6.92235e-16
423911	'ABLIM1'	mRNA	1.81728	4.39916e-18
423932	'INPP5F'	mRNA	1.21449	9.36965e-33
423963	'MKI67'	mRNA	1.27222	2.57133e-264
423969	'TCERG1L'	mRNA	1.4946	7.77741e-10
423974	'OPNVA'	mRNA	2.66673	1.98796e-20
423990	'CALCRL'	mRNA	2.70021	1.31071e-19
423994	'ZNF804A'	mRNA	2.08971	1.33733e-05
424003	'UNC80'	mRNA	3.32675	9.40534e-13
424011	'ABCA12'	mRNA	3.03725	1.0484e-07
424043	'GLS'	mRNA	1.01601	1.32204e-80
424046	'NABP1'	mRNA	1.04342	4.34977e-95
424052	'GTF3C3'	mRNA	1.13698	5.25706e-27
424054	'PGAP1'	mRNA	1.41942	3.09141e-11
424055	'ANKRD44'	mRNA	1.14034	4.09661e-25
424063	'SATB2'	mRNA	1.62221	0.000364324
424070	'SGO2'	mRNA	1.32675	1.5779e-08
424071	'AOX1'	mRNA	1.76161	5.04761e-12
424072	'AOX2'	mRNA	4.05715	2.90557e-12
424080	'CFLAR'	mRNA	1.12434	9.91734e-25
424082	'TRAK2'	mRNA	1.28434	1.54853e-20
424085	'ALS2'	mRNA	1.21455	1.74991e-49
424090	'CARF'	mRNA	2.87971	3.96405e-55
424100	'ZDBF2'	mRNA	1.93568	2.3527e-93
424110	'NBEAL1'	mRNA	1.72003	6.53391e-39
424114	'PIKFYVE'	mRNA	1.90159	2.4207e-76
424118	'SSFA2'	mRNA	1.28531	3.48406e-27
424124	'ZNF385B'	mRNA	2.16849	6.48989e-07
424161	'CCDC173'	mRNA	1.13661	8.47965e-50
424164	'KLHL41'	mRNA	3.1711	3.87878e-11
424170	'ABCB11'	mRNA	1.86908	8.24041e-58
424176	'TTC21B'	mRNA	1.46123	1.99e-40
424192	'LY75'	mRNA	2.25081	8.26354e-37
424195	'STK11IP'	mRNA	1.63582	1.74651e-34
424210	'STK36'	mRNA	1.49791	4.79902e-27
424231	'CNTNAP5'	mRNA	1.1601	0.000192051
424241	'ARHGEF1'	mRNA	1.35142	3.74045e-29
424264	'LMLN'	mRNA	1.88722	8.6981e-83
424275	'STEAP3'	mRNA	1.11125	0.000586372
424289	'CCNT2'	mRNA	1.84582	5.99558e-223
424294	'LCT'	mRNA	2.16379	1.13742e-34
424298	'HNMT'	mRNA	1.21371	2.46742e-14
424306	'ZEB2'	mRNA	1.80626	1.35128e-95
424319	'GALNT13'	mRNA	1.28483	1.01083e-16
424327	'CCDC148'	mRNA	1.64868	1.62593e-07
424330	'TANC1'	mRNA	1.70467	5.90011e-75
424345	'CAMSAP2'	mRNA	1.22677	8.87303e-65
424353	'ZBTB41'	mRNA	1.2176	4.38408e-18
424412	'CACNA1E'	mRNA	1.39658	6.70043e-07
424414	'KIAA1614'	mRNA	1.56776	1.90664e-07
424417	'CEP350'	mRNA	1.24993	9.2048e-58
424424	'SOAT1'	mRNA	1.14279	9.6909e-47
424431	'SEC16B'	mRNA	3.42191	7.69045e-14
424433	'BRINP2'	mRNA	1.94912	2.05202e-10
424441	'HEBP2'	mRNA	2.32247	4.18574e-05
424458	'RNPC3'	mRNA	1.0755	2.0665e-22
424466	'CDC14A'	mRNA	1.158	9.02333e-06
424479	'PTBP2'	mRNA	1.0872	4.68365e-42
424497	'CCDC18'	mRNA	2.6463	6.10544e-65
424504	'KIAA1107'	mRNA	1.02173	9.00736e-18
424526	'COL24A1'	mRNA	1.58809	2.04403e-38
424537	'SPATA1'	mRNA	1.40789	0.000480558
424543	'TTLL7'	mRNA	1.0033	3.32067e-06
424566	'SZT2'	mRNA	1.17653	1.01571e-75
424576	'SLC6A9'	mRNA	1.02031	5.12012e-28
424577	'KLF-4'	mRNA	1.80984	2.87405e-09
424586	'PLK3'	mRNA	1.05243	8.72887e-18
424588	'HECTD3L'	mRNA	1.69782	3.51786e-13
424601	'CCDC17'	mRNA	2.49959	2.73162e-07
424621	'STIL'	mRNA	2.013	1.61177e-68
424642	'ZCCHC11'	mRNA	1.34492	1.67373e-40
424647	'PODN'	mRNA	1.10678	2.46422e-09
424669	'C8B'	mRNA	1.42372	8.43941e-06
424671	'MYSM1'	mRNA	1.87265	4.95473e-95
424675	'HOOK1'	mRNA	1.69908	5.44109e-30
424698	'DNAJC6'	mRNA	1.45228	3.65354e-05
424700	'PDE4B'	mRNA	1.38113	2.57108e-37
424711	'LRRC7'	mRNA	2.01522	5.08432e-16
424714	'SRSF11'	mRNA	1.01444	6.0727e-285
424725	'MSH4'	mRNA	1.68757	1.42418e-40
424745	'INPP5D'	mRNA	1.62221	1.03043e-05
424746	'ATG16L1'	mRNA	1.38362	2.85006e-140
424747	'DGKD'	mRNA	2.21003	2.79015e-139
424755	'AMMECR1L'	mRNA	1.00467	8.99398e-52
424776	'TRPC1'	mRNA	1.22336	1.08337e-40
424782	'RASA2'	mRNA	1.12467	3.73646e-37
424817	'SLC25A36'	mRNA	1.33814	5.09131e-150
424826	'PIK3CB'	mRNA	1.47719	2.45306e-21
424829	'HES6'	mRNA	1.57602	6.27289e-25
424835	'TRPM2'	mRNA	1.08971	1.99973e-05
424836	'TSPEAR'	mRNA	1.99886	2.47071e-28
424846	'SNED1'	mRNA	1.80689	9.64563e-100
424849	'KIF1A'	mRNA	1.26361	2.95333e-107
424857	'NRROS'	mRNA	1.10833	0.000214152
424876	'MAP3K13'	mRNA	1.47613	3.24376e-28
424912	'BCL6'	mRNA	2.1643	7.1527e-30
424920	'RUBCN'	mRNA	1.49472	6.0479e-22
424947	'ABCC5'	mRNA	2.66204	0
424959	'MCF2L2'	mRNA	1.29182	3.15413e-05
424969	'CCDC39'	mRNA	1.77421	6.40295e-07
424983	'ECT2'	mRNA	1.02522	6.00452e-61
424996	'LRRC34'	mRNA	2.49535	1.30091e-14
424997	'MECOM'	mRNA	1.17766	2.05831e-18
425024	'CCNL1'	mRNA	1.8977	1.2459e-163
425025	'LEKR1'	mRNA	2.24583	2.48395e-19
425026	'TIPARP'	mRNA	1.12859	2.39648e-22
425030	'PLCH1'	mRNA	1.58979	6.87166e-92
425036	'MED12L'	mRNA	2.66763	1.86635e-66
425060	'CLK2'	mRNA	1.55168	2.80968e-79
425064	'ASH1L'	mRNA	1.67538	2.67738e-123
425067	'GON4L'	mRNA	1.61446	5.77965e-116
425068	'RIT1'	mRNA	1.1695	1.97524e-241
425070	'KHDC4'	mRNA	1.04353	5.88269e-44
425072	'GOLPH3L'	mRNA	1.50733	1.17184e-10
425103	'gene-FAM83D'	mRNA	1.31865	4.45412e-75
425111	'RBL2'	mRNA	1.07744	1.27457e-17
425137	'AKR1B1L'	mRNA	1.28702	1.34504e-05
425211	'DAPP1'	mRNA	1.03725	5.24798e-07
425214	'LOC425214'	mRNA	1.7946	3.81212e-11
425238	'LOC425238'	mRNA	2.64062	1.90166e-05
425295	'CLCN2'	mRNA	2.41164	0.000191755
425342	'TEX9'	mRNA	1.45228	7.43985e-14
425347	'LOC425347'	mRNA	1.51043	1.82232e-37
425353	'DYSF'	mRNA	2.03963	2.99105e-236
425396	'PNPLA6'	mRNA	1.16121	2.37705e-32
425418	'SUPT6H'	mRNA	1.0414	2.41543e-135
425431	'LOC425431'	mRNA	1.29219	1.18003e-42
425485	'SFMBT2'	mRNA	2.32675	3.03012e-29
425499	'NCKAP1L'	mRNA	1.12913	8.60718e-09
425544	'EIF4G3'	mRNA	1.06666	8.5256e-136
425592	'FCRL4'	mRNA	2.1701	2.20616e-76
425673	'SP2'	mRNA	1.16382	1.96968e-18
425792	'MAP3K9'	mRNA	2.23323	1.00081e-38
425805	'NGFR'	mRNA	2.03725	2.04093e-23
425840	'ARID4B'	mRNA	1.40338	7.21935e-45
425846	'KMT2D'	mRNA	1.10107	1.70652e-163
425886	'CDYL2'	mRNA	1.07448	7.63101e-06
425900	'ANKRD12'	mRNA	1.69107	8.86903e-12
425984	'NBEAL2'	mRNA	1.78167	8.57324e-177
426013	'PLEKHG5'	mRNA	1.32242	5.6237e-22
426017	'DAGLA'	mRNA	1.99935	1.14645e-60
426050	'MTCL1'	mRNA	1.51616	3.32909e-27
426163	'ADGRB2'	mRNA	1.1549	9.75661e-07
426211	'KAZN'	mRNA	1.15575	3.26774e-11
426226	'GSE1'	mRNA	1.2693	1.24152e-68
426279	'RIMBP3C'	mRNA	2.00468	3.24097e-14
426281	'SRCIN1'	mRNA	1.71204	1.1557e-22
426295	'MNS1'	mRNA	1.5337	1.26148e-30
426298	'C22H2ORF42'	mRNA	1.26828	1.98097e-22
426324	'MCTP2'	mRNA	1.17927	3.42097e-11
426408	'ZNF555'	mRNA	1.20928	1.51062e-47
426422	'LOC426422'	mRNA	6.92531	4.98679e-23
426427	'KIAA0556'	mRNA	1.21036	1.13747e-18
426454	'GPR155'	mRNA	1.11525	7.07801e-14
426464	'LRRC27'	mRNA	1.3819	1.18789e-13
426469	'ANKRD52'	mRNA	2.20612	1.4579e-30
426500	'BLOC1S3'	mRNA	1.3445	6.61585e-52
426522	'GPATCH8'	mRNA	1.84983	0
426582	'HECTD4'	mRNA	1.28525	4.10124e-114
426627	'SH3TC2'	mRNA	1.65582	2.65764e-23
426630	'AGBL2'	mRNA	2.1601	2.60929e-09
426631	'FNBP4'	mRNA	1.2956	7.28106e-238
426699	'FBXO38'	mRNA	1.45228	1.43169e-56
426737	'MAPT'	mRNA	1.02652	3.21185e-14
426754	'TRIM63'	mRNA	1.22392	3.57802e-15
426771	'ADGRA2'	mRNA	2.17337	4.13295e-56
426778	'WHSC1L1'	mRNA	1.69815	1.31421e-143
426779	'LETM2'	mRNA	1.73441	1.23491e-45
426786	'ZMAT4'	mRNA	2.11525	7.48348e-09
426789	'KAT6A'	mRNA	1.17988	3.30091e-92
426810	'ZNF608'	mRNA	1.1217	2.86503e-64
426813	'GRAMD3'	mRNA	1.7891	2.61091e-23
426846	'LIPG'	mRNA	1.96984	3.88047e-83
426869	'SCN8A'	mRNA	2.15716	8.439e-42
426883	'ASIC1'	mRNA	1.20948	1.57593e-41
426920	'UNC5D'	mRNA	1.16772	1.07631e-05
426923	'TTI2'	mRNA	1.11125	2.00781e-15
426929	'ENPP1'	mRNA	1.76456	1.20214e-10
426934	'PANX2'	mRNA	1.04065	2.35488e-31
426948	'LZTS3'	mRNA	1.13036	2.57545e-11
426970	'CASP9'	mRNA	1.29433	1.08564e-20
426986	'MAPK8IP3'	mRNA	2.63005	0
427000	'ERI2'	mRNA	1.61456	1.71295e-35
427004	'DNAH3'	mRNA	1.82033	3.01697e-21
427031	'HECTD2'	mRNA	3.78619	2.18255e-36
427091	'SLC25A42'	mRNA	1.64589	2.02885e-38
427107	'ARRDC3'	mRNA	1.08234	1.15625e-38
427118	'RFESD'	mRNA	2.27331	7.85252e-06
427146	'MIER3'	mRNA	1.21171	5.18415e-20
427160	'ADAMTS6'	mRNA	1.09532	1.94363e-38
427169	'MAST4'	mRNA	1.79644	1.7922e-37
427187	'C7'	mRNA	1.47876	1.42181e-06
427201	'ARHGEF28'	mRNA	1.03453	1.26647e-08
427203	'ENC1'	mRNA	1.02463	2.61492e-53
427208	'ANKRD31'	mRNA	2.62302	1.37315e-115
427226	'RIC1'	mRNA	1.47699	2.87774e-59
427227	'KIAA2026'	mRNA	1.5698	2.08026e-58
427231	'KDM4C'	mRNA	1.79015	4.65866e-07
427235	'ACER2'	mRNA	1.2228	8.67268e-11
427236	'DENND4C'	mRNA	1.5749	4.07434e-23
427246	'APBA1'	mRNA	1.40144	1.72284e-21
427249	'TRPM3'	mRNA	2.25964	8.12524e-05
427255	'TMC1'	mRNA	3.71532	7.53976e-22
427277	'RGMB'	mRNA	1.33915	1.7516e-33
427287	'PCGF3'	mRNA	1.93468	3.7775e-104
427351	'RFX3'	mRNA	1.16026	5.90942e-33
427354	'TTC39B'	mRNA	1.79693	1.32045e-11
427355	'FREM1'	mRNA	2.51118	2.35887e-123
427362	'HRC8L'	mRNA	3.92477	4.22274e-06
427381	'DGKQ'	mRNA	1.29709	8.90481e-16
427385	'DMXL1'	mRNA	2.34331	2.96455e-130
427394	'BDP1L'	mRNA	1.41884	1.61457e-66
427409	'DNAJB5'	mRNA	2.34897	2.18498e-43
427423	'MTMR12'	mRNA	1.33656	6.02782e-20
427440	'CZH5ORF42'	mRNA	1.3542	1.3494e-35
427447	'RICTOR'	mRNA	1.75927	7.21042e-105
427449	'DAB2'	mRNA	1.02602	1.75726e-06
427460	'AGTPBP1'	mRNA	2.97166	2.21405e-11
427502	'TRPM7'	mRNA	1.03845	2.03012e-52
427538	'HYDIN'	mRNA	4.39088	9.01538e-05
427547	'CADNL'	mRNA	1.90295	6.19956e-07
427553	'CDH8'	mRNA	1.76041	0.000204015
427606	'NRG2'	mRNA	2.03725	0.000135782
427616	'FCHSD1'	mRNA	1.00248	2.46228e-14
427623	'ADRB2'	mRNA	1.18925	5.22832e-05
427625	'SH3PXD2B'	mRNA	1.46592	7.91211e-48
427640	'TRIM69'	mRNA	1.71281	2.80244e-29
427642	'FNIP1'	mRNA	1.71131	4.44527e-23
427643	'SPRY4'	mRNA	2.50291	4.5921e-27
427678	'GRIN2A'	mRNA	1.77421	7.46156e-09
427706	'SFI1'	mRNA	2.18785	2.95213e-88
427723	'RNFT2'	mRNA	1.75443	3.41945e-88
427725	'BTN3A3L1'	mRNA	4.18383	2.56659e-07
427737	'YF6'	mRNA	1.87083	2.30396e-13
427756	'CARD9'	mRNA	1.39839	2.74377e-14
427797	'ARHGAP44'	mRNA	1.24979	1.01908e-06
427798	'gene-FOXK2-2'	mRNA	1.73082	2.8147e-09
427807	'ANKFN1'	mRNA	1.80223	1.11393e-09
427828	'RTN4RL1'	mRNA	1.03564	1.45912e-26
427829	'KIF12'	mRNA	2.92622	5.32629e-07
427839	'KSR1'	mRNA	1.07883	4.37612e-25
427841	'gene-RAP1GAP2'	mRNA	1.82152	2.98099e-05
427844	'LRRK2'	mRNA	1.4453	7.82611e-21
427845	'SLC26A4'	mRNA	3.67468	4.09032e-05
427846	'CDHR3'	mRNA	1.86611	1.01642e-07
427847	'ATXN7L1'	mRNA	1.20392	4.34134e-26
427850	'RELN'	mRNA	1.58485	1.92967e-103
427863	'GRIP1'	mRNA	2.54539	1.57267e-33
427871	'ALX1'	mRNA	1.01416	0.000168173
427900	'CACNA1I'	mRNA	2.45228	0.000131549
427917	'KIAA1147'	mRNA	1.13797	3.65643e-11
427919	'BICD1'	mRNA	1.22096	1.27064e-09
427935	'PHF21B'	mRNA	1.47186	2.30401e-19
427960	'GUCA1C'	mRNA	2.76214	2.62906e-14
427977	'GART-B'	mRNA	4.11525	5.66549e-07
427986	'ZBTB21'	mRNA	1.48184	1.35755e-47
427990	'SYTL5'	mRNA	2.53029	6.1252e-05
427991	'XK'	mRNA	2.82152	0.00012831
427992	'LANCL3'	mRNA	1.98353	2.43603e-50
428001	'CDKL5'	mRNA	1.97209	7.42793e-51
428012	'TBC1D8'	mRNA	1.02815	5.17378e-21
428014	'GCC2'	mRNA	1.13581	8.01854e-17
428021	'ZIC2'	mRNA	1.41388	8.07592e-51
428079	'GPR12'	mRNA	2.29731	7.32137e-10
428142	'RIMS4'	mRNA	2.69249	3.20023e-36
428151	'KCNQ2'	mRNA	4.48623	2.50038e-56
428158	'ASXL1'	mRNA	1.09891	2.28346e-89
428166	'PMEPA1'	mRNA	1.08092	9.38268e-08
428170	'KLHDC7A'	mRNA	1.88227	3.61216e-28
428176	'TAS1R1'	mRNA	1.34845	0.000549673
428180	'PLCH2'	mRNA	2.46467	2.16284e-35
428191	'CROCC'	mRNA	2.23615	1.58345e-133
428201	'STC1'	mRNA	1.17544	2.31085e-08
428208	'HIVEP3'	mRNA	1.07822	6.81214e-05
428218	'MTF1'	mRNA	1.82815	1.92278e-08
428219	'EPHA10'	mRNA	1.96886	9.22221e-09
428223	'CLSPN'	mRNA	1.09218	2.20811e-61
428233	'C2CD2L'	mRNA	2.44179	1.6546e-80
428262	'SLC26A9'	mRNA	1.15508	1.20958e-16
428269	'DCLRE1B'	mRNA	1.73986	1.01193e-16
428282	'ADAM11'	mRNA	1.42942	5.79075e-07
428328	'ATP8B3'	mRNA	3.03725	6.76072e-10
428340	'NRTN'	mRNA	3.10274	7.9948e-13
428364	'HNF4G'	mRNA	3.53975	3.23337e-08
428385	'ASAP1'	mRNA	1.01293	2.08931e-28
428401	'ALS2CL'	mRNA	1.47876	2.6473e-09
428419	'NSUN6'	mRNA	1.37368	3.29709e-12
428437	'CHN2'	mRNA	1.42532	4.30717e-06
428460	'STAC'	mRNA	1.37155	2.02569e-13
428513	'TSHZ1'	mRNA	1.41534	2.52431e-49
428541	'LOC428541'	mRNA	2.77421	0.000191356
428549	'NKX2-2'	mRNA	2.11525	7.48348e-09
428556	'CLIP4'	mRNA	2.18925	1.77033e-21
428566	'SYT14'	mRNA	1.36613	7.66744e-07
428568	'GLTSCR1L'	mRNA	1.34972	7.10839e-34
428580	'ZBTB18'	mRNA	1.65809	1.18426e-51
428587	'PCNX2'	mRNA	1.10552	4.84929e-29
428612	'OLIG2'	mRNA	2.00042	2.14665e-65
428616	'CLVS2'	mRNA	1.14466	1.46148e-08
428622	'REV3L'	mRNA	1.63865	1.26162e-121
428628	'GRIK2'	mRNA	2.36982	1.75546e-07
428630	'FAXC'	mRNA	1.43276	1.86274e-18
428635	'SNAP91'	mRNA	1.76349	2.16053e-05
428641	'PHF3'	mRNA	1.23592	2.49448e-100
428655	'GDF7'	mRNA	1.98834	1.16426e-07
428656	'MFSD2B'	mRNA	1.54915	2.66616e-09
428687	'BCORL1'	mRNA	1.59043	1.56503e-50
428695	'RXFP2'	mRNA	1.14233	3.92676e-05
428699	'FRMPD3'	mRNA	5.08649	4.16091e-26
428712	'SPRY3'	mRNA	1.60925	5.29247e-12
428717	'GAB3'	mRNA	1.52629	2.33685e-07
428729	'MFAP3L'	mRNA	1.76456	1.20214e-10
428744	'ARHGEF38'	mRNA	4.18925	0.000328144
428750	'NEIL3'	mRNA	1.00819	1.87815e-10
428760	'ADAMTS3'	mRNA	1.03179	1.58665e-34
428763	'TMPRSS11F'	mRNA	1.36393	0.000142804
428770	'ZGRF1'	mRNA	2.17531	2.09185e-44
428790	'ARAP2'	mRNA	1.72359	4.15922e-14
428805	'FBXO41'	mRNA	2.14416	1.52047e-11
428824	'LOC428824'	mRNA	1.17295	1.40805e-31
428825	'OR5AS1'	mRNA	2.32675	3.60549e-08
428847	'TMEM86A'	mRNA	1.31027	6.92707e-12
428851	'FADS1L1'	mRNA	2.16849	6.48989e-07
428862	'LRRC4C'	mRNA	1.32675	1.12978e-06
428868	'RHOV'	mRNA	1.11859	2.08292e-25
428898	'ALKBH1'	mRNA	1.11249	3.24996e-30
428899	'CEP128'	mRNA	1.64262	2.09603e-11
428910	'MOK'	mRNA	3.86732	1.32504e-10
428928	'NIN'	mRNA	1.25947	5.87599e-75
428956	'ZNF488'	mRNA	2.20361	9.02672e-10
428991	'JAKMIP3'	mRNA	2.95479	3.81466e-05
428995	'VWC2L'	mRNA	1.94343	1.53613e-19
429010	'FAM126B'	mRNA	1.9201	7.30002e-63
429027	'B3GALT1'	mRNA	1.8308	2.29163e-06
429030	'MYO10L'	mRNA	1.4268	3.82419e-72
429048	'MAP3K19'	mRNA	2.28236	0.000588026
429058	'KCNT2'	mRNA	1.34125	1.11948e-09
429070	'ASTN1'	mRNA	1.52019	6.64324e-55
429073	'ZBTB37'	mRNA	1.29135	4.71427e-27
429082	'FRRS1'	mRNA	1.00868	3.11844e-07
429110	'PRKAA2'	mRNA	1.25811	2.90573e-10
429117	'SLC44A5'	mRNA	1.11933	1.42582e-29
429125	'GRK7'	mRNA	1.63977	0.000412017
429159	'PHC3'	mRNA	1.53717	1.78706e-08
429163	'ARHGEF26'	mRNA	1.44577	1.03909e-11
429171	'GRIN3B'	mRNA	1.58835	4.35033e-34
429249	'FCGBPL'	mRNA	2.62221	1.28196e-09
429363	'APC2'	mRNA	1.8793	2.2583e-26
429367	'P2RX6'	mRNA	1.45228	1.86642e-05
429400	'HOXC12'	mRNA	4.32675	4.37869e-08
429472	'WHRN'	mRNA	1.14416	2.60543e-05
429474	'MICAL1'	mRNA	1.00483	0.000458821
429484	'PLAG1'	mRNA	1.13111	1.95627e-38
429518	'DOCK2L'	mRNA	2.77421	0.000191356
429536	'TBCEL'	mRNA	1.91442	1.08991e-67
429823	'HMCN1'	mRNA	2.67901	4.17384e-144
429900	'COL25A1'	mRNA	2.20436	1.48047e-17
429940	'HOXB2'	mRNA	1.10562	5.75167e-27
429967	'CABP2'	mRNA	1.08154	1.00657e-20
430080	'FAM46B'	mRNA	1.04953	2.23694e-11
430113	'TYK2'	mRNA	1.17503	3.75409e-64
430126	'CELSR2'	mRNA	1.57299	1.90206e-83
430150	'CACNA2D2'	mRNA	1.58339	8.27764e-80
430270	'POU3F1'	mRNA	1.61734	2.70869e-05
430336	'SMARCD3'	mRNA	1.08547	1.99476e-49
430409	'IRF5'	mRNA	1.98834	1.16426e-07
430422	'LOC430422'	mRNA	1.18925	3.46398e-05
430477	'COL16A1'	mRNA	1.01955	3.09169e-21
430492	'TDRD7'	mRNA	1.16585	8.21194e-16
430534	'FOXM1'	mRNA	1.30292	2.19924e-144
430542	'NEU3'	mRNA	1.77453	3.41355e-51
430557	'ACACB'	mRNA	2.01028	3.7805e-05
430664	'SGSM1'	mRNA	1.81486	3.37147e-26
430698	'HOXC11'	mRNA	4.45228	5.88427e-05
430723	'BSN'	mRNA	1.60429	2.73704e-12
430731	'ZNF226L'	mRNA	1.25418	8.05053e-12
430761	'KIF20AL'	mRNA	1.9828	9.78628e-15
430882	'IKZF5'	mRNA	1.14389	1.12954e-14
430998	'EVI5L'	mRNA	1.27364	8.66375e-36
431047	'gene-NR1D1-2'	mRNA	1.89286	4.02952e-05
431090	'GRIN2C'	mRNA	1.06794	1.27856e-09
431137	'CLEC18B'	mRNA	1.17313	0.000346492
431181	'KCNB2'	mRNA	1.36982	0.000421122
431212	'HOXD3'	mRNA	1.13328	2.59101e-140
431251	'PRLHRL'	mRNA	4.25964	0.000213118
431347	'CELF3'	mRNA	4.18925	1.47995e-13
431387	'SLC25A12'	mRNA	1.48331	3.78562e-50
431400	'NRARP'	mRNA	1.0558	4.98449e-128
431499	'LOC431499'	mRNA	1.94006	7.88939e-58
431530	'RFX7'	mRNA	1.01469	6.53204e-55
431595	'FAM169A'	mRNA	1.18048	4.56121e-24
431603	'ADAMTSL1'	mRNA	1.16989	3.13196e-06
431607	'PTAR1'	mRNA	1.17218	6.08085e-07
431637	'KIAA1958'	mRNA	1.68724	7.27309e-22
431670	'DAPK1'	mRNA	1.18143	2.51988e-33
693250	'H1F0'	mRNA	2.7905	1.34701e-54
768091	'TSC22D3'	mRNA	1.50558	6.03332e-11
768421	'HK3'	mRNA	1.59772	3.65095e-05
768434	'HEATR7B2L1'	mRNA	1.78955	3.32733e-06
768444	'CACNA2D1'	mRNA	2.16566	1.44712e-31
768450	'FAM131B'	mRNA	2.14416	1.52047e-11
768548	'FAM222A'	mRNA	1.10436	2.1333e-37
768554	'GRPEL2'	mRNA	9.06545	7.36628e-80
768579	'ARHGAP39L'	mRNA	2.03416	3.56331e-37
768599	'ASAP2'	mRNA	1.12512	6.06984e-19
768612	'TCF4Z'	mRNA	1.05778	1.97954e-09
768638	'FAM19A5'	mRNA	1.29617	0.000616419
768642	'CCDC113'	mRNA	2.08971	2.48351e-12
768717	'NUMA1'	mRNA	1.17299	0
768736	'PANX3'	mRNA	2.77517	7.95025e-53
768763	'MSANTD2'	mRNA	1.03339	6.24413e-38
768783	'BTN1'	mRNA	1.64125	5.96293e-50
768802	'HARS2'	mRNA	1.47667	2.37859e-39
768838	'MZT2BL'	mRNA	1.43898	9.77075e-68
768861	'DNAH17'	mRNA	2.15888	2.91343e-40
768916	'SCMH1'	mRNA	1.61557	7.03433e-47
768990	'TMEM173'	mRNA	2.52553	2.79907e-11
769005	'AFMID'	mRNA	1.42122	1.61035e-37
769024	'GPR17'	mRNA	4.25964	0.000213118
769200	'LMTK2'	mRNA	1.25703	4.38446e-33
769261	'UBAP1L'	mRNA	2.95479	3.41205e-09
769280	'SENP7'	mRNA	2.75185	1.43123e-64
769290	'OVCH2'	mRNA	1.50887	4.31166e-09
769312	'NEMP1'	mRNA	1.07457	7.07189e-43
769329	'ANKRD40L'	mRNA	2.0289	3.98632e-54
769355	'MAFG'	mRNA	1.31931	3.28972e-13
769385	'CACNA1G'	mRNA	1.32937	2.46866e-24
769410	'SPTB'	mRNA	1.16366	2.03492e-16
769431	'ANKS3'	mRNA	1.8793	5.36821e-60
769464	'FCHO2'	mRNA	1.02043	3.73363e-21
769490	'HS3ST3B1'	mRNA	1.04004	1.59404e-16
769506	'DGKH'	mRNA	3.48594	7.5647e-18
769528	'GRAMD1B'	mRNA	2.18751	2.6434e-71
769654	'SNTB2'	mRNA	1.07678	2.48162e-22
769660	'LOC769660'	mRNA	1.87085	2.12947e-29
769661	'ATF7'	mRNA	1.04808	8.95049e-27
769701	'TUBGCP6'	mRNA	1.09601	1.6227e-22
769704	'LOC769704'	mRNA	1.53181	0.000143028
769757	'MPP4'	mRNA	1.51642	0.000117573
769785	'AIPL1'	mRNA	2.86732	2.45282e-10
769808	'TMEM8B'	mRNA	1.39088	2.55176e-06
769830	'FAM78B'	mRNA	1.18925	3.53009e-19
769918	'GMEB1'	mRNA	1.08329	1.08425e-30
769940	'RANBP17'	mRNA	2.92737	4.97059e-50
769944	'MTCP1'	mRNA	1.91402	2.4928e-12
770009	'FOXJ1'	mRNA	1.0968	2.40223e-05
770049	'FUK'	mRNA	1.84798	2.05987e-157
770095	'EVC2'	mRNA	1.1601	3.88171e-11
770104	'NLGN3'	mRNA	1.72293	1.60452e-10
770158	'ELAVL2'	mRNA	1.04276	7.28627e-05
770165	'LOC770165'	mRNA	3.85974	2.68946e-28
770247	'MAB21L3'	mRNA	2.52267	8.92441e-14
770254	'KLF4'	mRNA	1.78159	1.78798e-07
770271	'LOC770271'	mRNA	2.15272	0.000240357
770283	'GFOD1'	mRNA	1.32819	3.35291e-22
770295	'LOC770295'	mRNA	3.47218	4.05206e-11
770327	'MTHFD2L'	mRNA	1.01734	2.98092e-06
770471	'HOXC10'	mRNA	2.71167	1.11053e-69
770610	'ABCA7'	mRNA	1.58979	3.21893e-10
770613	'GORAB'	mRNA	1.0511	2.85775e-25
770690	'PODXL2'	mRNA	1.26637	7.14277e-83
770766	'CCDC141'	mRNA	1.82779	2.00964e-20
770775	'IRX5'	mRNA	1.30739	7.66509e-18
770794	'AAREL'	mRNA	1.25689	3.46921e-06
770841	'DCDC2B'	mRNA	1.62221	2.95874e-07
770854	'CAMKV'	mRNA	1.01933	0.000203581
770867	'JPH2'	mRNA	1.51697	2.34199e-06
770947	'FAM167A'	mRNA	1.28611	6.31185e-32
770984	'ZNF618'	mRNA	1.47066	1.1926e-16
771014	'GNG13'	mRNA	4.03725	1.33416e-06
771015	'CRTC1'	mRNA	1.24042	1.1273e-97
771133	'FUT9'	mRNA	2.06372	1.89818e-05
771137	'SLC26A8'	mRNA	2.82152	1.14609e-18
771214	'HOXD9'	mRNA	1.11465	2.29117e-20
771243	'PECAM1'	mRNA	2.49004	3.23466e-108
771246	'HOXD10'	mRNA	1.75081	1.26697e-41
771271	'KCNE4'	mRNA	2.00483	0.000191407
771328	'TBX1'	mRNA	1.47876	0.000803933
771348	'PDX1'	mRNA	1.60429	0.000186603
771375	'EVX2'	mRNA	1.77421	5.99068e-06
771393	'NMNAT2'	mRNA	1.24236	0.000297346
771397	'NKX2-8'	mRNA	1.25727	9.54019e-19
771410	'IGFN1'	mRNA	1.55538	2.05188e-10
771427	'PRICKLE2'	mRNA	1.10436	1.279e-14
771446	'TCFL5'	mRNA	2.05054	1.20557e-09
771456	'LOC771456'	mRNA	2.48791	2.786e-13
771487	'MAPKBP1'	mRNA	1.6704	8.95349e-66
771495	'TMEM82'	mRNA	1.03725	3.09453e-06
771537	'MEIKIN'	mRNA	2.60151	4.35135e-19
771549	'INPP5K'	mRNA	1.13573	2.13076e-52
771612	'LOC771612'	mRNA	2.05997	3.74087e-06
771616	'ZNF512B'	mRNA	1.60056	3.02806e-101
771632	'PIGV'	mRNA	1.8081	3.18418e-90
771638	'SDR42E2L'	mRNA	2.88145	1.32151e-08
771648	'SSTR1'	mRNA	1.59524	0.000492678
771674	'PROK2'	mRNA	1.59524	0.000492678
771681	'VWA5B1'	mRNA	3.12433	9.04969e-61
771843	'TTLL9'	mRNA	1.91795	1.41009e-13
771888	'MMR1L4'	mRNA	4.7253	6.9821e-06
771891	'REEP2'	mRNA	1.62783	6.56502e-122
771902	'C20H20ORF112'	mRNA	1.32748	5.98294e-43
771945	'TRPV3'	mRNA	4.11525	8.11156e-13
771961	'MKNK1'	mRNA	1.21215	9.3369e-06
771996	'CIPC'	mRNA	1.06234	1.76572e-34
772096	'LOC772096'	mRNA	1.47139	1.3273e-08
772097	'CD226'	mRNA	4.22487	1.57292e-07
772213	'PHF19'	mRNA	2.10982	1.40169e-22
772279	'SLC24A4'	mRNA	1.44335	8.03081e-09
772294	'LDLRAD1'	mRNA	1.84133	1.39705e-08
772331	'BEND2'	mRNA	1.59691	3.89461e-19
772356	'CADM3'	mRNA	1.08307	1.73457e-24
775985	'BEND6'	mRNA	1.71235	7.21166e-25
776014	'BAHCC1'	mRNA	1.31381	1.05633e-297
776034	'SP8'	mRNA	1.70037	9.8046e-70
776038	'SGIP1'	mRNA	1.8308	2.29163e-06
776067	'LOC776067'	mRNA	1.34277	0
776143	'HOXA10'	mRNA	1.71126	3.61334e-40
777252	'SLC12A5'	mRNA	1.76456	1.20552e-29
777366	'CACNB1'	mRNA	1.32375	3.33353e-31
777386	'PRDM8'	mRNA	2.22722	1.7797e-14
777528	'PDE1B'	mRNA	1.49831	8.02896e-26
777580	'WNK4'	mRNA	1.53717	8.21861e-16

## Sheet: SF3B1 gRNA vs Ctrl gRNA(down)
Gene ID	Gene Symbol	Type	log2 (SF3B1 gRNA_1_2 / Ctrl gRNA)	Qvalue (SF3B1 gRNA_1_2 / Ctrl gRNA)
100857161	'SLC22A31'	mRNA	-1.09873	0.000568114
100857299	'LOC100857299'	mRNA	-1.05219	2.41258e-45
100857973	'GM2A'	mRNA	-1.54495	1.22476e-81
100858087	'MESP2'	mRNA	-1.029	6.2497e-05
100858365	'HAPLN4'	mRNA	-1.33062	0.000101404
100859106	'LOC100859106'	mRNA	-1.42325	0.000167379
100859277	'CYP4F11'	mRNA	-1.18871	2.79866e-09
100859283	'PHLDA3'	mRNA	-1.13268	0.000480046
101748282	'GJB3'	mRNA	-1.09568	2.28585e-06
101748456	'FNDC9L'	mRNA	-2.05022	0.000519783
101748543	'LOC101748543'	mRNA	-1.07256	2.59521e-07
101748691	'FOXI2'	mRNA	-1.0275	1.01837e-15
101749098	'ITGA7'	mRNA	-1.53044	1.29884e-10
101749333	'KRT18'	mRNA	-1.01861	0
101749520	'KCNJ13'	mRNA	-4.75717	1.77689e-14
101749790	'LOC101749790'	mRNA	-1.54772	7.90965e-05
101749942	'UPK3B'	mRNA	-1.42813	0.000700982
101750711	'LOC101750711'	mRNA	-7.19532	5.6255e-13
101752219	'PI3'	mRNA	-1.1052	0.000106209
107049250	'LOC107049250'	mRNA	-1.39571	4.19852e-07
107049506	'FKBP11'	mRNA	-1.116	2.98627e-31
107049571	'LOC107049571'	mRNA	-1.08235	0.000362266
107050261	'LOC107050261'	mRNA	-1.50243	2.48738e-28
107050300	'LOC107050300'	mRNA	-1.57746	1.12985e-18
107050437	'LOC107050437'	mRNA	-1.05115	4.50844e-12
107051077	'LOC107051077'	mRNA	-1.06053	3.67898e-06
107052718	'LOC107052718'	mRNA	-1.0726	4.15943e-89
107052719	'LOC107052719'	mRNA	-1.05425	5.32799e-24
107054462	'LOC107054462'	mRNA	-1.12283	1.7958e-08
107054465	'LOC107054465'	mRNA	-1.01144	7.58907e-12
107054466	'LOC107054466'	mRNA	-1.06467	0.000238266
107054662	'LOC107054662'	mRNA	-5.77422	8.75456e-06
107055139	'SLC39A1'	mRNA	-1.00321	1.12942e-65
107055200	'LOC107055200'	mRNA	-1.28119	3.63777e-18
107055335	'TMIGD2'	mRNA	-1.21674	2.20385e-05
107056991	'LOC107056991'	mRNA	-1.4002	3.4836e-35
112529960	'LOC112529960'	mRNA	-1.57077	1.0778e-07
112530215	'LOC112530215'	mRNA	-1.21883	7.82523e-18
112530444	'MGAT1'	mRNA	-1.00243	1.99915e-71
112530978	'BEST2'	mRNA	-1.50346	1.07025e-160
112531693	'LOC112531693'	mRNA	-2.01271	1.30481e-05
112532192	'LOC112532192'	mRNA	-2.90782	1.56128e-07
112532770	'LOC112532770'	mRNA	-4.14516	0
374135	'CTGF'	mRNA	-1.30598	3.86381e-97
374213	'ACVR2B'	mRNA	-1.28886	4.74882e-184
378792	'RHBG'	mRNA	-1.09568	1.3038e-11
378800	'SOSTDC1'	mRNA	-1.06763	5.4484e-28
378906	'ZP3'	mRNA	-2.01586	4.94504e-15
395085	'PROC'	mRNA	-1.06451	4.35742e-08
395144	'CLDN4'	mRNA	-1.56152	2.38084e-46
395244	'UNC93B1'	mRNA	-1.38061	1.40317e-21
395387	'MMP9'	mRNA	-1.08537	3.64652e-07
395437	'CFC1'	mRNA	-1.4572	1.25394e-30
395527	'CD9'	mRNA	-1.50263	1.79689e-10
395596	'EPAS1'	mRNA	-1.42587	2.53565e-117
395812	'HAND1'	mRNA	-1.11544	2.47221e-164
395991	'LOC395991'	mRNA	-1.43437	2.44583e-87
396007	'PMEL'	mRNA	-1.30559	1.03548e-60
396255	'CALB2'	mRNA	-1.20194	3.53144e-06
396279	'SST'	mRNA	-1.33276	5.03553e-14
396365	'LOC396365'	mRNA	-1.54772	0.000693809
396433	'TNNT2'	mRNA	-1.4705	7.64501e-43
408039	'KRT14'	mRNA	-1.08014	5.83231e-90
408082	'EDNRB'	mRNA	-1.31353	1.16266e-32
414845	'CDH3'	mRNA	-1.18998	0
414873	'PDLIM3'	mRNA	-1.00715	5.82927e-09
415687	'FA2H'	mRNA	-1.09873	1.72297e-15
415860	'CDH1'	mRNA	-1.00577	7.82692e-83
416071	'FHIT'	mRNA	-1.02126	1.90451e-09
416245	'NIPAL4'	mRNA	-1.71764	5.60547e-06
416266	'FAT2'	mRNA	-1.07457	2.2305e-20
416874	'MYL2'	mRNA	-1.06556	3.25712e-05
416920	'KREMEN1'	mRNA	-1.06579	1.23681e-58
417051	'DMB2'	mRNA	-1.06671	2.83739e-12
417242	'ASTN2'	mRNA	-1.09631	3.25984e-137
417248	'TMEM268'	mRNA	-1.16212	1.5292e-08
417281	'ENTPD8L'	mRNA	-1.07856	3.66606e-20
417474	'CLDN9'	mRNA	-1.25297	2.48459e-05
417514	'UPK3BL'	mRNA	-1.4335	1.45518e-55
417769	'WNT2'	mRNA	-2.08687	1.48042e-06
417815	'SLC16A7'	mRNA	-1.06709	9.78789e-07
417843	'CPM'	mRNA	-1.07234	1.08659e-45
417964	'EMP1'	mRNA	-1.2728	5.39279e-44
418044	'RAC2'	mRNA	-1.44361	2.14642e-11
418345	'UPK1B'	mRNA	-1.26224	2.53302e-98
419057	'P4HA3'	mRNA	-1.01277	4.13101e-10
419077	'SMPD1'	mRNA	-1.14039	1.30556e-123
419191	'KCNK15'	mRNA	-1.29869	3.24539e-05
419428	'RNF223'	mRNA	-1.2093	9.57922e-06
419557	'FABP3'	mRNA	-1.35356	1.45833e-46
419684	'PITHD1'	mRNA	-1.79835	1.21524e-37
419802	'APOA5'	mRNA	-1.0131	7.83003e-11
419809	'SLC16A4'	mRNA	-1.31789	1.06129e-08
419908	'IP6K3'	mRNA	-1.9667	0.000286149
420044	'KRT23'	mRNA	-1.45461	2.35544e-05
420166	'TRIM55'	mRNA	-1.38793	9.17533e-05
420744	'BMPER'	mRNA	-1.015	2.54632e-22
421089	'CHST9'	mRNA	-1.24599	2.42593e-24
421158	'PKP1'	mRNA	-1.23536	6.26951e-12
421160	'LAD1'	mRNA	-1.20778	4.15503e-12
421447	'EPHX1L'	mRNA	-1.75417	0.00070945
421471	'VIT'	mRNA	-1.03204	6.88642e-55
421683	'PERP1'	mRNA	-1.22256	3.25637e-13
421935	'LOC421935'	mRNA	-1.11031	1.43439e-05
422107	'CD300LG'	mRNA	-1.10744	7.85241e-06
422268	'POF1B'	mRNA	-1.10843	6.60015e-38
422413	'FAM198B'	mRNA	-1.45764	8.909e-14
423042	'ADM'	mRNA	-1.05176	0.000203202
423784	'C6H10ORF71'	mRNA	-1.13268	0.000175019
423907	'VWA2'	mRNA	-1.1683	2.55057e-07
424387	'PIGC'	mRNA	-1.1398	1.49349e-30
424564	'ELOVL1'	mRNA	-1.18678	9.72753e-178
424910	'CLDN1'	mRNA	-1.21803	0
424936	'ALPI'	mRNA	-2.2227	9.25952e-202
425961	'CLEC3A'	mRNA	-5.13268	0.000474567
426748	'PLA2G2A'	mRNA	-1.45461	0.000959856
426871	'METTL7A'	mRNA	-1.42813	1.08101e-06
426894	'AQP3'	mRNA	-1.12234	5.74357e-11
426933	'FIBIN'	mRNA	-1.47852	0
427183	'PTGER4'	mRNA	-1.06994	5.04187e-07
427232	'HACD4'	mRNA	-1.03228	5.45407e-08
427781	'Pou5f3'	mRNA	-1.26874	6.8364e-27
427812	'KCNJ16'	mRNA	-1.22579	7.41335e-13
427981	'CLIC6'	mRNA	-1.38643	1.89092e-19
428006	'NLGN4L'	mRNA	-1.4671	0.000324271
428199	'ANTXR1'	mRNA	-1.17115	0.00055879
428200	'PROM2'	mRNA	-1.54772	3.30738e-13
428268	'LAMB3'	mRNA	-1.4057	5.76635e-07
428320	'TMPRSS9'	mRNA	-1.14104	8.55523e-39
428949	'UGT8L'	mRNA	-1.39066	4.71176e-18
429040	'WNT10A'	mRNA	-1.29495	1.78651e-09
429089	'CYR61'	mRNA	-1.60964	1.47577e-59
429762	'NAT8'	mRNA	-1.21277	1.53921e-11
430880	'DNAJC22'	mRNA	-1.17115	0.00055879
431081	'SLC35F6'	mRNA	-1.17753	1.27213e-08
431587	'SELENOP1'	mRNA	-1.33568	1.17232e-138
693256	'BLB1'	mRNA	-1.12401	1.52646e-06
768449	'F2RL2'	mRNA	-1.03692	7.99976e-14
768538	'SPTLC3'	mRNA	-1.18514	8.84784e-10
770022	'HIST2H3D'	mRNA	-1.03888	1.40019e-06
770188	'HIST1H2B7L2'	mRNA	-1.38646	1.60427e-06
770345	'HSPB7L'	mRNA	-3.59211	0.000170024
770665	'LTC4SL'	mRNA	-1.37369	1.89942e-07
770705	'LOC770705'	mRNA	-1.33118	1.91056e-95
770844	'VGLL1'	mRNA	-1.17357	9.36748e-27
770936	'LOC770936'	mRNA	-1.34212	7.99534e-12
770953	'DDO'	mRNA	-1.23922	3.19822e-09
771058	'BMP8A'	mRNA	-1.47817	7.55495e-13
771092	'WNT9B'	mRNA	-1.70269	1.94336e-39
771943	'C26H1orf74'	mRNA	-1.49401	1.56882e-19
772063	'STEAP4'	mRNA	-2.07609	1.81637e-05
776390	'ACPP'	mRNA	-1.3026	3.41802e-09

## Sheet: DLC1 gRNA vs Ctrl gRNA(up)
Gene ID	Gene Symbol	Type	log2 (DLC1 gRNA_1_2 / Ctrl gRNA)	Qvalue (DLC1 gRNA_1_2 / Ctrl gRNA)
100857973	'GM2A'	mRNA	1.73469	0.00281894
396073	'NKX2-5'	mRNA	3.81089	0.00391299
422618	'TECRL'	mRNA	7.13037	0.0411927
772243	'LOC772243'	mRNA	9.22695	0.0333421

## Sheet: DLC1 gRNA vs Ctrl gRNA(down)
Gene ID	Gene Symbol	Type	log2 (DLC1 gRNA_1_2 / Ctrl gRNA)	Qvalue (DLC1 gRNA_1_2 / Ctrl gRNA)
107049060	'HBE'	mRNA	-1.53393	0.00087923
396532	'SLC4A1'	mRNA	-1.9803	0.011189
416650	'HBZ'	mRNA	-1.56785	0.00268173
416651	'HBM'	mRNA	-1.4834	0.0101906
416652	'HBA1'	mRNA	-1.40299	0.0100791
419079	'HBBR'	mRNA	-1.7207	0.000980663
770705	'LOC770705'	mRNA	-2.15042	2.75868e-08
