# Supplementary material for: Determination of Trunk Neural Crest Cell Fate and Susceptibility to Splicing Perturbation by the DLC1-SF3B1-PHF5A Splicing Complex
Source: Research Square preprint supplement (doi:10.21203/rs.3.rs-2603667/v1), 2024-05-09
Supplement: Supplementary file 3 [file 85636cc55d783df235c2a471.xlsx]

## Sheet: RNA-seq
	Ratio				Increase
Intron Names	SF3B1 gRNA1	PHF5A gRNA1	DLC1 gRNA1	Ctrl gRNA	SF3B1 gRNA1	PHF5A gRNA1	DLC1 gRNA1
SOX9 Intron1	18.612	15.01	11.781	5.394	2.4505	1.78272	1.18409
SOX9 Intron2	5.173	6.522	10.377	0	NA	NA	NA
SNAI2 Intron1	19.068	22.473	14.713	11.494	0.658952	0.955194	0.280059
SNAI2 Intron3	32.24	28.74	18.454	11.918	1.70515	1.41148	0.548414
ID1 Intron1	14.099	16.171	16.843	2.666	4.28845	5.06564	5.3177
TWIST1 Intron1	41.659	21.102	28.402	15.122	1.75486	0.39545	0.878191
MYC Intron1	31.44	27.355	17.272	10.248	2.06792	1.6693	0.685402
BMP4 Intron2	67.096	67.691	65.494	65.173	0.0295061	0.0386356	0.00492535
WNT1 Intron1	0	0	0	0	NA	NA	NA
WNT1 Intron2	0	0	0	0	NA	NA	NA
PAX7 Intron3	0	0	0	0	NA	NA	NA
PAX7 Intron4	0	0	0	0	NA	NA	NA
PAX7 Intron7	0	0	0	0	NA	NA	NA
MYB Intron2	0	0	0	0	NA	NA	NA
Notes:
NA: percentage of Increase is not available, because the Ratio of intron in Ctrl group is zero.
