# Supplementary material for: Determination of Trunk Neural Crest Cell Fate and Susceptibility to Splicing Perturbation by the DLC1-SF3B1-PHF5A Splicing Complex
Source: Research Square preprint supplement (doi:10.21203/rs.3.rs-2603667/v1), 2024-05-09
Supplement: Supplementary file 4 [file a278b18efc6893edb5a7fe60.xlsx]

## Sheet: Processed data__iBAQ_IgGvsPHF5A
Protein list:
iBAQ= Intensity based absolute quantitation w. r. t. total cell count i.e.protein copy number or protein abundance
Gene Symbol	Log2(iBAQ IgG)	Log2(iBAQ MC_PHF5A)	Potential contaminant	Peptides	Razor + unique peptides	Unique peptides	Sequence coverage [%]	Unique + razor sequence coverage [%]	Unique sequence coverage [%]	Mol. weight [kDa]	Q-value	Score	Intensity	MS/MS count	Protein IDs	Majority protein IDs	Gene Symbol
CDT1	NaN	12.1329		1	1	1	1.5	1.5	1.5	64.39	0.008	5.6336	152700	0	E1BS75	E1BS75	CDT1
-	NaN	15.9244		1	1	1	0.3	0.3	0.3	269.15	0	7.9099	8458000	2	E1BU04	E1BU04	-
MYO18A	NaN	11.6988		1	1	1	0.4	0.4	0.4	231.99	0.0084034	5.78	349040	0	E1BY27	E1BY27	MYO18A
SF3B1	NaN	13.4457		1	1	1	1.2	1.2	1.2	145.72	0	7.4273	691710	1	E1C2C3	E1C2C3	SF3B1
-	NaN	14.797		1	1	1	0.4	0.4	0.4	288.97	0.0081967	5.7189	4042300	2	E1C5Z3	E1C5Z3	-
RACK1;GNB2L1	NaN	15.897		1	1	1	8.8	8.8	8.8	35.076	0	5.9771	1220400	1	P63247;E6N1V8	P63247;E6N1V8	RACK1;GNB2L1
RCJMB04_19g1	NaN	16.4764		2	2	2	10.9	10.9	10.9	23.219	0	11.623	1550000	2	Q6EE58;F1NPA9;Q5ZJC1	Q6EE58;F1NPA9;Q5ZJC1	RCJMB04_19g1
RCJMB04_2l3	NaN	16.1586		10	1	0	22.7	4.3	0	83.301	0.0083333	5.7762	2340800	1	F1NVN4;Q5ZIC0;Q2XQE5;Q5ZKZ3;Q5ZMA5	F1NVN4;Q5ZIC0;Q2XQE5;Q5ZKZ3;Q5ZMA5	RCJMB04_2l3
HSPA9	NaN	13.9032		1	1	1	1.8	1.8	1.8	73.191	0	5.9267	582190	1	Q5ZM98;F1NZ86	Q5ZM98;F1NZ86	HSPA9
H2AFZ;H2AFV	NaN	NaN		3	1	1	23	8.8	8.8	12.02	0	8.7554	0	1	F2Z4M5;Q5ZMD6;P02272;Q92064;R4GJP9;Q788R4	F2Z4M5;Q5ZMD6;P02272;Q92064;R4GJP9	H2AFZ;H2AFV
RPS6	NaN	15.0498		1	1	1	4.9	4.9	4.9	28.423	0	7.916	271350	1	Q9PTD6;P47838;F7BYQ2	Q9PTD6;P47838;F7BYQ2	RPS6
SF3B4	NaN	15.852		1	1	1	1.9	1.9	1.9	43.923	0	6.5957	946330	1	H9L019	H9L019	SF3B4
PCDHGA2	NaN	15.211		1	1	1	1.2	1.2	1.2	100.35	0	6.6198	1327500	1	O13129;R4GLV8	O13129;R4GLV8	PCDHGA2
SF3A3	NaN	15.0685		1	1	1	1.8	1.8	1.8	58.888	0	16.88	824680	1	Q5F387	Q5F387	SF3A3
HSPG	NaN	11.2135		1	1	1	0.2	0.2	0.2	432.84	0	5.9523	465450	1	Q6KDZ1	Q6KDZ1	HSPG
-	NaN	15.1261		1	1	1	5.6	5.6	5.6	13.859	0.0079365	5.6306	321850	0	Q9PSQ5;R4GJZ8	Q9PSQ5;R4GJZ8	-
H2A-VII	22.8878	23.4096		4	4	2	49.6	49.6	37.2	13.94	0	131.92	94517000	18	Q92069;P02263;Q788R3;P70082;P35062;R4GJN7	Q92069;P02263;Q788R3;P70082;P35062;R4GJN7	H2A-VII
ACTG1	22.2864	22.6085		19	19	1	73.1	73.1	4.5	41.792	0	302	230200000	83	Q5ZMQ2;Q5ZLX9	Q5ZMQ2	ACTG1
H4	21.5627	22.7115		5	5	5	41.7	41.7	41.7	11.439	0	55.41	59796000	23	P70081;P62801;Q6B834	P70081;P62801	H4
H3	20.9703	21.8853		1	1	1	5.1	5.1	5.1	15.388	0	11.182	23713000	6	Q92068;P84247;P84229	Q92068;P84247;P84229	H3
H2B	20.6509	21.7152		2	2	2	19	19	19	13.964	0	66.832	35625000	15	Q9PSW9;P0C1H4;P0C1H3;A0A0A0MQ64;F1NF30;P0C1H5	Q9PSW9;P0C1H4;P0C1H3;A0A0A0MQ64;F1NF30;P0C1H5	H2B
-	20.2557	20.6298	+	2	2	2	18.1	18.1	18.1	16.622	0	39.113	17247000	10	CON__Streptavidin	CON__Streptavidin	-
EEF1A2	19.5928	20.4663		10	10	10	27.5	27.5	27.5	50.156	0	99.635	47029000	32	Q90835;Q5ZKM2;F1N9H4;Q6PTX1	Q90835;Q5ZKM2;F1N9H4	EEF1A2
-	19.5351	20.8869	+	2	2	2	7.8	7.8	7.8	24.409	0	65.336	29686000	12	CON__P00761	CON__P00761	-
HBAA	19.2224	21.6843	+	4	4	4	28.2	28.2	28.2	15.184	0	36.61	35834000	16	CON__P01966;P01994;P02001;P02007	CON__P01966;P01994	HBAA
-	19.0081	20.2358		7	7	2	23.5	23.5	5.8	45.9	0	126.58	38765000	20	P02552	P02552	-
VIM	18.9095	19.7098		11	11	11	25.9	25.9	25.9	53.142	0	118.37	47248000	34	P09654;F1NJ08;Q49MC0;Q49MC1;E1BZ05;O73665;P02542;R4GHS8;E1C5R3;P16053;F1NUT7;F1ND22	P09654;F1NJ08;Q49MC0	VIM
ENO1	18.4179	19.6072		6	6	3	23.3	23.3	10.6	47.332	0	113.58	25274000	16	F1NZ78;P51913;Q5ZIQ4;P07322	F1NZ78;P51913;Q5ZIQ4	ENO1
-	18.4042	18.2629		1	1	1	1.3	1.3	1.3	59.845	0.0081301	5.718	17859000	3	E1BY05	E1BY05	-
UbI;RPS27A;UBB	18.3057	20.1352		2	2	2	35.2	35.2	35.2	8.0251	0	21.824	5902500	7	Q9PST8;P79781;Q91021;P0CG62;Q91022	Q9PST8;P79781;Q91021;P0CG62;Q91022	UbI;RPS27A;UBB
TUBB4B	18.2469	19.1734		8	8	2	33.7	33.7	7.2	49.86	0	97.008	17144000	24	P09206;F1NYB1;P09653	P09206;F1NYB1	TUBB4B
HNRNPA2B1	18.1635	19.1881		6	6	6	24.1	24.1	24.1	36.985	0	84.201	16927000	15	Q5ZME1	Q5ZME1	HNRNPA2B1
HBE1;HBE;HBB	18.1211	19.0792	+	2	2	2	13.9	13.9	13.9	22.06	0	23.718	8389600	9	CON__Q3SX09;Q90864;P02128;P02127;P02112;F1NMZ3	CON__Q3SX09;Q90864;P02128;P02127;P02112;F1NMZ3	HBE1;HBE;HBB
-	18.1172	18.8067	+	11	11	11	20.7	20.7	20.7	69.366	0	108.8	26743000	28	CON__P02768-1;CON__P02769	CON__P02768-1	-
TNFSF6	17.9063	18.1908		1	1	1	2.8	2.8	2.8	28.831	0	6.285	6538500	2	Q5CAQ0;F6SXF4	Q5CAQ0;F6SXF4	TNFSF6
RPL14	17.8514	NaN		1	1	1	9.2	9.2	9.2	15.478	0	18.131	945950	2	Q98TF9;F6R347	Q98TF9;F6R347	RPL14
RPL22	17.824	17.6481		1	1	1	10.2	10.2	10.2	14.655	0	7.1215	1749800	3	F1N9J4;Q98TF8	F1N9J4;Q98TF8	RPL22
-	17.5603	19.4122	+	2	2	2	12.5	12.5	12.5	38.418	0	52.329	12474000	10	CON__P12763	CON__P12763	-
-	17.5523	18.9749	+	10	10	10	29.4	29.4	29.4	53.704	0	123.84	20516000	22	CON__P05787;CON__H-INV:HIT000292931;Q6PVZ4;H9KZ26;A0A146F038;A0A146F031;A0A146F021;A0A146F010;CON__REFSEQ:XP_092267;H9KZP5;H9KZP2;O93532;A0A146F0A0;CON__Q9H552;H2EQW7;Q6PVZ3;H9KZ27;A0A146F050;A0A146F047;CON__Q8BGZ7;CON__P50446;CON__P48668;CON__P04259;CON__P02538;Q6PVZ5;R4GGI4	CON__P05787;CON__H-INV:HIT000292931	-
HNRNPA1	17.543	18.2582		4	4	4	14.1	14.1	14.1	38.166	0	39.703	9585500	9	Q5ZLB3;R4GKX4	Q5ZLB3;R4GKX4	HNRNPA1
ACTB	17.5088	18.6947		19	1	1	73.1	4.5	4.5	41.736	0	22.368	12216000	3	P60706;P53478;Q0QWA1;G4WW42;A9YXX3;A9YXX2	P60706;P53478	ACTB
SRSF3;SRSF7	17.4863	17.7875		1	1	1	8.5	8.5	8.5	19.329	0	7.9249	2869000	2	E1C8Y9;R4GME2;Q5ZMI0;E1BRL9;E1BVX5	E1C8Y9;R4GME2;Q5ZMI0;E1BRL9;E1BVX5	SRSF3;SRSF7
-	17.3925	17.8533		1	1	1	6.5	6.5	6.5	15.75	0.0082645	5.7189	3270900	2	R4GG79;E1C4R5	R4GG79;E1C4R5	-
HIST1H111L	17.2411	18.6779		1	1	1	5.5	5.5	5.5	21.881	0	13.183	4019900	3	P09987;P08288;P08284;F1NME1;P08286;P08285;P08287;F1NPJ2	P09987;P08288;P08284;F1NME1;P08286;P08285;P08287;F1NPJ2	HIST1H111L
HNRNPK	17.223	18.4666		5	5	5	16.9	16.9	16.9	47.102	0	56.785	12365000	15	E1C453;Q5ZIQ3;H9L0I0	E1C453;Q5ZIQ3;H9L0I0	HNRNPK
GAPDH	17.1329	17.3943		3	3	3	11.1	11.1	11.1	35.704	0	31.983	5371800	8	P00356;F1NH87	P00356;F1NH87	GAPDH
HSP90AA1	17.1128	18.2786		10	10	0	20.3	20.3	0	84.058	0	99.691	15170000	19	P11501	P11501	HSP90AA1
RPLP1	17.0902	18.384		1	1	1	22.8	22.8	22.8	11.477	0	10.965	1444800	1	P18660	P18660	RPLP1
HSPA8;HSP70	17.0738	18.4205		7	7	6	15.6	15.6	13.9	70.87	0	77.289	16131000	17	F1NWP3;O73885;Q7SX63;P08106;B3VHV2;B6EAX2;D6PVB7;Q7ZSX8	F1NWP3;O73885;Q7SX63;P08106;B3VHV2;B6EAX2	HSPA8;HSP70
RPS7	17.0657	18.2789		2	2	2	17.3	17.3	17.3	22.311	0	23.117	4552400	6	F1NN16	F1NN16	RPS7
-	17.0241	17.8326		1	1	1	17	17	17	9.9082	0	7.8379	2566900	2	Q90YX6;F6UGI5	Q90YX6;F6UGI5	-
RPL7A	16.9252	17.4745		2	2	2	9.1	9.1	9.1	29.868	0	13.621	3065500	5	F2Z4L5;P32429	F2Z4L5;P32429	RPL7A
YWHAE	16.8666	18.4103		3	3	2	17.5	17.5	13.2	26.633	0	28.306	7018200	8	F1P2P9;Q5ZMT0;F1NMY1;Q5ZLQ6;Q5ZMD1;R4GF89;Q5ZKJ2;Q5F3W6	F1P2P9;Q5ZMT0	YWHAE
RPS21	16.8061	17.9654		1	1	1	18.1	18.1	18.1	9.1183	0	16.175	1852600	3	E1BSJ2	E1BSJ2	RPS21
ATP5F1B	16.797	18.2529		3	3	3	9.3	9.3	9.3	52.946	0	45.886	10656000	10	H9L340;Q5ZLC5	H9L340;Q5ZLC5	ATP5F1B
PKM	16.7478	17.6587		4	4	4	12.5	12.5	12.5	58.014	0	37.647	10460000	10	P00548;F1NW43	P00548;F1NW43	PKM
CALM1	16.7269	17.5863		1	1	1	8.8	8.8	8.8	16.706	0	14.786	2747300	3	F2Z4K8;P62149;O93410	F2Z4K8;P62149;O93410	CALM1
HSP90AB1	16.6562	17.6711		8	3	2	16.4	4.4	2.8	83.426	0	38.553	10296000	9	Q04619;F1NC33	Q04619;F1NC33	HSP90AB1
-	16.6008	17.3719		2	2	2	21.4	21.4	21.4	21.835	0	18.597	2421100	3	F1NS91	F1NS91	-
ENO2	16.5615	18.2208		4	1	1	19.6	6.9	6.9	47.324	0	18.836	8044100	3	F1NG74;O57391	F1NG74;O57391	ENO2
HSPD1	16.5327	17.4709		5	5	5	11.2	11.2	11.2	60.972	0	49.16	8570600	11	Q5ZL72	Q5ZL72	HSPD1
-	16.4154	17.2436		1	1	1	7.6	7.6	7.6	30.352	0	7.868	3396200	4	F1NVA4	F1NVA4	-
HSPA5	16.3933	17.4092		6	5	5	17.9	16.3	16.3	72.018	0	43.866	7804000	9	Q90593	Q90593	HSPA5
HNRNPD	16.391	17.3959		2	2	2	9.3	9.3	9.3	29.355	0	16.347	2842400	6	Q5ZIH1	Q5ZIH1	HNRNPD
TUBA8B	16.3439	17.5156		7	2	2	26	10	10	51.042	0	21.496	5952300	6	F1NXR6;P09644;F1NMP5;P09643;F1NMP3;Q6PTX0;P08070	F1NXR6;P09644;F1NMP5	TUBA8B
RCJMB04_30d2	16.3019	16.2282		1	1	1	8.3	8.3	8.3	18.938	0	9.8675	1575600	2	E1C3K3;Q5ZI56;F1NYL7	E1C3K3;Q5ZI56;F1NYL7	RCJMB04_30d2
RPS14	16.2971	17.2395		1	1	1	8.6	8.6	8.6	16.273	0	6.0488	941060	1	Q5ZHW8	Q5ZHW8	RPS14
ggFLNb; FLNB	16.1994	17.9012		1	1	1	3.9	3.9	3.9	32.296	0	9.4639	4160600	3	Q7ZZR8;Q9YGW4;Q90574;F1N8D4;Q90WF1;Q90WF0	Q7ZZR8;Q9YGW4;Q90574;F1N8D4;Q90WF1;Q90WF0	ggFLNb; FLNB
ATP5A1	16.1928	17.1809		3	3	3	6.9	6.9	6.9	60.186	0	31.016	6928000	5	Q8UVX3;F1NI22;F1NGA2;Q9DDH7;Q90ZX5;Q90ZX4;Q90VX2	Q8UVX3;F1NI22;F1NGA2;Q9DDH7	ATP5A1
RPS23	16.1673	17.8936		1	1	1	18.9	18.9	18.9	15.807	0	10.665	1902600	1	F1NDC2	F1NDC2	RPS23
SET	16.1495	16.7815		1	1	1	5.1	5.1	5.1	32.151	0	13.079	1668000	3	Q5F3R9;F2Z4L4	Q5F3R9;F2Z4L4	SET
RPL6	16.1234	17.0993		1	1	1	3	3	3	33.923	0	6.4148	2329700	3	Q8UWG7	Q8UWG7	RPL6
-	16.0315	17.0195	+	1	1	1	4	4	4	26.558	0	6.8731	1598700	3	CON__P07477	CON__P07477	-
ALDH1A1; ALDH6	16.0195	16.9022		2	2	2	3.9	3.9	3.9	55.809	0	16.233	4722700	9	P27463;F1NJC7;F1NIE7;Q9DD46;O93344;E1BT93	P27463;F1NJC7;F1NIE7;Q9DD46;O93344;E1BT93	ALDH1A1; ALDH6
-	16.011	16.9529		2	2	2	8.7	8.7	8.7	24.185	0	12.391	1736100	4	F1NB02;Q6EE57	F1NB02;Q6EE57	-
avANT;SLC25A4;SLC25A6;SLC25A5	15.9799	17.1895		2	2	2	14.8	14.8	14.8	29.149	0	27.985	3639800	4	F1NBW8;Q8AYM3;Q5ZMJ6;Q5ZLG7;F1NJ10	F1NBW8;Q8AYM3;Q5ZMJ6;Q5ZLG7;F1NJ10	avANT;SLC25A4;SLC25A6;SLC25A5
--	15.9322	15.2317	+	1	1	1	1.9	1.9	1.9	57.552	0	9.1903	2828100	1	CON__Q8VED5;CON__Q5XKE5	CON__Q8VED5;CON__Q5XKE5	--
TUBA4B	15.9134	17.0244		5	1	1	17.1	4.4	4.4	50.059	0	12.39	4095600	3	F1N9J7;F1NW97;P09645;P09642;F1P5B0	F1N9J7;F1NW97	TUBA4B
RPLP0	15.8787	18.0715		2	2	2	6.3	6.3	6.3	34.285	0	31.02	4700000	3	P47826;F1NB66	P47826;F1NB66	RPLP0
-	15.855	18.203		2	2	2	17	17	17	17.288	0	17.304	4332100	5	O57535	O57535	-
RCJMB04_23c5;ACTN2; ACTN1;ACTN4	15.8428	17.1433		1	1	1	7.2	7.2	7.2	19.132	0	8.2453	2238800	2	F1NJ54;Q5ZIW4;F1NCV1;Q5ZJN7;R9PXN5;R9PXN4;R9PXQ0;P05094-2;P05094;P20111;Q90734;P20111-2	F1NJ54;Q5ZIW4;F1NCV1;Q5ZJN7;R9PXN5;R9PXN4;R9PXQ0;P05094-2;P05094;P20111;Q90734;P20111-2	RCJMB04_23c5;ACTN2; ACTN1;ACTN4
RPS24	15.8268	16.6771		1	1	1	8.9	8.9	8.9	15.643	0.0080645	5.6562	977490	1	F1NF89	F1NF89	RPS24
-	15.787	17.1462		1	1	1	17.4	17.4	17.4	7.8409	0	7.7635	604780	1	F1NTT2	F1NTT2	-
LDHA	15.7411	16.6068		2	2	2	8.7	8.7	8.7	36.514	0	15.194	2627800	4	P00340;E1BTT8	P00340;E1BTT8	LDHA
HSP90B1	15.7012	15.4794		3	2	2	4.4	2.9	2.9	91.215	0	17.983	3859500	4	B5AAV6;P08110;F1NWB7;Q90WA6;Q9PSP5	B5AAV6;P08110;F1NWB7;Q90WA6	HSP90B1
RPS16	15.6571	14.5719		1	1	1	6.8	6.8	6.8	16.413	0	6.1372	836330	1	R4GGJ0	R4GGJ0	RPS16
-	15.6509	15.8157	+	1	1	1	4.4	4.4	4.4	33.423	0	7.4935	1200400	1	CON__H-INV:HIT000015463	CON__H-INV:HIT000015463	-
EEF2	15.6465	17.036		6	6	6	9.7	9.7	9.7	95.228	0	44.007	8355300	13	F1NFS0;Q90705;R4GK33;D5G0G8;B4ZAD9	F1NFS0;Q90705;R4GK33	EEF2
SRP14	15.6202	17.4705		1	1	1	12.7	12.7	12.7	12.528	0	12.188	1391800	1	Q5ZIE3	Q5ZIE3	SRP14
-	15.6036	17.1467	+	2	2	1	6	6	4.4	48.105	0	16.107	5652000	4	CON__Q04695	CON__Q04695	-
RPL15	15.5312	16.6263		1	1	1	5.5	5.5	5.5	19.305	0	11.616	1336600	3	P51417;F1NQG5	P51417;F1NQG5	RPL15
RPS10	15.5247	16.7176		1	1	1	5.5	5.5	5.5	18.91	0	6.7049	1239300	2	E1C4N0	E1C4N0	RPS10
RPL13	15.3989	16.2332		1	1	1	5.2	5.2	5.2	24.395	0	24.467	1082100	2	P41125	P41125	RPL13
COPE	15.2952	NaN		1	1	1	3.2	3.2	3.2	34.369	0	6.0335	643310	1	Q5ZIK9	Q5ZIK9	COPE
CFL2	15.0923	16.2471		1	1	1	6.6	6.6	6.6	18.661	0	7.3266	1239900	3	P21566	P21566	CFL2
-	14.9706	15.9972		1	1	1	6.4	6.4	6.4	24.572	0	7.4908	1170200	3	F1NIB4;Q90626;Q90602	F1NIB4;Q90626;Q90602	-
TUBB2A	14.948	17.413		8	2	2	38	7.7	7.7	43.509	0	14.621	3504100	4	G1K342;P09244;P32882;G1K338;P09203;F1NMU4;P09652	G1K342;P09244;P32882;G1K338;P09203	TUBB2A
DDX3X	14.9043	15.8875		1	1	1	1.5	1.5	1.5	72.048	0	13.047	3377400	3	Q5F491;F1NIX2	Q5F491;F1NIX2	DDX3X
-	14.8826	15.8892	+	1	1	1	3.6	3.6	3.6	46.103	0	20.781	1908800	3	CON__P34955	CON__P34955	-
LDHB	14.8592	16.9461		1	1	1	6	6	6	36.318	0	26.746	2495900	2	P00337	P00337	LDHB
VDAC1	14.8526	15.3842		1	1	1	8.1	8.1	8.1	30.706	0	6.4571	1230000	1	E1BYN7	E1BYN7	VDAC1
HNRNPR	14.8379	15.9766		2	2	2	4.1	4.1	4.1	71.019	0	17.584	3188100	3	E1BZR1;F6SG96	E1BZR1;F6SG96	HNRNPR
RPS4	14.7437	16.231		1	1	1	5	5	5	29.463	0	25.637	1669600	3	F1NFC6;P47836	F1NFC6;P47836	RPS4
YWHAZ	14.7143	15.4386		2	1	1	9.8	5.7	5.7	27.775	0	7.4408	998090	1	Q5ZKC9	Q5ZKC9	YWHAZ
EIF4A2	14.5844	15.7474		2	2	2	6.3	6.3	6.3	43.551	0	12.711	1750700	2	R9PXN1;Q8JFP1	R9PXN1;Q8JFP1	EIF4A2
-	14.559	15.3175	+	1	1	1	1.4	1.4	1.4	65.865	0	6.8367	2533900	2	CON__P35908;CON__Q3TTY5	CON__P35908;CON__Q3TTY5	-
MYL6	14.4922	15.7294		1	1	1	8.6	8.6	8.6	16.983	0	7.3466	773730	1	P02607-2;P02607	P02607-2;P02607	MYL6
#NAME?	14.4349	15.1973		1	1	1	3.2	3.2	3.2	46.88	0	9.6694	1313800	2	Q6EE32	Q6EE32	#NAME?
HNRNPA0	14.4141	15.2616		1	1	1	2.1	2.1	2.1	32.986	0	6.455	916710	3	F1NCI5	F1NCI5	HNRNPA0
RCJMB04_2m14;HNRNPH2	14.4104	15.4306		1	1	1	3.3	3.3	3.3	53.635	0	11.975	1186900	1	Q5ZM95;Q5F3I8;Q6WNG8;F1NEG6	Q5ZM95;Q5F3I8;Q6WNG8;F1NEG6	RCJMB04_2m14;HNRNPH2
RPS3A	14.2204	16.4323		1	1	1	6.4	6.4	6.4	29.867	0	10.952	1827900	1	F2Z4K7	F2Z4K7	RPS3A
-	14.2041	15.1122		2	2	2	3.6	3.6	3.6	74.994	0	15.435	2008800	3	F1NSP8;Q2MHD2	F1NSP8;Q2MHD2	-
P4HB	14.1357	15.3018		2	2	2	4.4	4.4	4.4	55.786	0	14.398	1926900	3	F1N9H3;P09102;V9GZR5	F1N9H3;P09102;V9GZR5	P4HB
AKAP11	14.0771	14.5842		1	1	1	0.4	0.4	0.4	209.12	0	6.1275	3306000	1	F1NAS3	F1NAS3	AKAP11
-	14.0412	15.9971	+	1	1	1	5.2	5.2	5.2	45.456	0	7.7169	1480700	1	CON__Q3SZH5	CON__Q3SZH5	-
PDIA3	13.9901	14.9606		1	1	1	2	2	2	56.181	0	7.0536	1348400	2	Q8JG64	Q8JG64	PDIA3
ANXA2	13.9828	15.1736		1	1	1	2.7	2.7	2.7	38.64	0	16.147	1222400	3	P17785	P17785	ANXA2
-	13.9237	15.6654	+	1	1	1	2.9	2.9	2.9	101.51	0	12.524	2902900	1	CON__Q3T052	CON__Q3T052	-
vcp	13.8391	15.2709		1	1	1	2.4	2.4	2.4	58.821	0	7.1732	1625800	2	H9KYT1;Q5ZMU9	H9KYT1;Q5ZMU9	vcp
CPS1	13.616	15.4787		1	1	1	1.8	1.8	1.8	158.34	0	10.023	3958700	5	Q5KTI9;F1N9N8	Q5KTI9;F1N9N8	CPS1
-	13.6118	14.8567		1	1	1	2.3	2.3	2.3	69.572	0	7.7816	1307900	2	F1P555	F1P555	-
CCT2	13.587	14.5382		1	1	1	2.2	2.2	2.2	57.431	0	6.5602	1155100	1	Q5F424	Q5F424	CCT2
MDH2	13.2393	16.4846		2	2	2	7.1	7.1	7.1	35.655	0	16.393	2230100	2	E1BVT3	E1BVT3	MDH2
PPP1R12A	13.2338	15.5965		1	1	1	0.9	0.9	0.9	106.97	0	6.1715	2663000	3	Q90623-2;Q90623;F1NA71	Q90623-2;Q90623;F1NA71	PPP1R12A
LMNA	12.681	13.764		1	1	1	1.5	1.5	1.5	73.164	0	12.38	901060	2	P13648	P13648	LMNA
-	11.2022	15.1575	+	2	2	2	2.8	2.8	2.8	66.017	0	14.677	1206000	1	CON__P04264	CON__P04264	-
