# Supplementary material for: Determination of Trunk Neural Crest Cell Fate and Susceptibility to Splicing Perturbation by the DLC1-SF3B1-PHF5A Splicing Complex
Source: Research Square preprint supplement (doi:10.21203/rs.3.rs-2603667/v1), 2024-05-09
Supplement: Supplementary file 5 [file a734224215767466cdcf87dc.xlsx]

## Sheet: PHF5A_MS
Majority protein IDs	Gene Symbol	iBAQ IgG	iBAQ PHF5A	Unique peptides	Mol. weight [kDa]	Q-value	Score	Intensity
E1BS75	CDT1	NaN	12.1329	1	64.39	0.008	5.6336	152700
E1BU04	-	NaN	15.9244	1	269.15	0	7.9099	8458000
E1BY27	MYO18A	NaN	11.6988	1	231.99	0.0084034	5.78	349040
E1C2C3	SF3B1	NaN	13.4457	1	145.72	0	7.4273	691710
E1C5Z3	-	NaN	14.797	1	288.97	0.0081967	5.7189	4042300
P63247;E6N1V8	RACK1;GNB2L1	NaN	15.897	1	35.076	0	5.9771	1220400
Q6EE58;F1NPA9;Q5ZJC1	RCJMB04_19g1	NaN	16.4764	2	23.219	0	11.623	1550000
F1NVN4;Q5ZIC0;Q2XQE5;Q5ZKZ3;Q5ZMA5	RCJMB04_2l3	NaN	16.1586	0	83.301	0.0083333	5.7762	2340800
Q5ZM98;F1NZ86	HSPA9	NaN	13.9032	1	73.191	0	5.9267	582190
F2Z4M5;Q5ZMD6;P02272;Q92064;R4GJP9	H2AFZ;H2AFV	NaN	NaN	1	12.02	0	8.7554	0
Q9PTD6;P47838;F7BYQ2	RPS6	NaN	15.0498	1	28.423	0	7.916	271350
H9L019	SF3B4	NaN	15.852	1	43.923	0	6.5957	946330
O13129;R4GLV8	PCDHGA2	NaN	15.211	1	100.35	0	6.6198	1327500
Q5F387	SF3A3	NaN	15.0685	1	58.888	0	16.88	824680
Q6KDZ1	HSPG	NaN	11.2135	1	432.84	0	5.9523	465450
Q9PSQ5;R4GJZ8	-	NaN	15.1261	1	13.859	0.0079365	5.6306	321850
Q92069;P02263;Q788R3;P70082;P35062;R4GJN7	H2A-VII	22.8878	23.4096	2	13.94	0	131.92	94517000
Q5ZMQ2	ACTG1	22.2864	22.6085	1	41.792	0	302	230200000
P70081;P62801	H4	21.5627	22.7115	5	11.439	0	55.41	59796000
Q92068;P84247;P84229	H3	20.9703	21.8853	1	15.388	0	11.182	23713000
Q9PSW9;P0C1H4;P0C1H3;A0A0A0MQ64;F1NF30;P0C1H5	H2B	20.6509	21.7152	2	13.964	0	66.832	35625000
CON__Streptavidin	-	20.2557	20.6298	2	16.622	0	39.113	17247000
Q90835;Q5ZKM2;F1N9H4	EEF1A2	19.5928	20.4663	10	50.156	0	99.635	47029000
CON__P00761	-	19.5351	20.8869	2	24.409	0	65.336	29686000
CON__P01966;P01994	HBAA	19.2224	21.6843	4	15.184	0	36.61	35834000
P02552	-	19.0081	20.2358	2	45.9	0	126.58	38765000
P09654;F1NJ08;Q49MC0	VIM	18.9095	19.7098	11	53.142	0	118.37	47248000
F1NZ78;P51913;Q5ZIQ4	ENO1	18.4179	19.6072	3	47.332	0	113.58	25274000
E1BY05	-	18.4042	18.2629	1	59.845	0.0081301	5.718	17859000
Q9PST8;P79781;Q91021;P0CG62;Q91022	UbI;RPS27A;UBB	18.3057	20.1352	2	8.0251	0	21.824	5902500
P09206;F1NYB1	TUBB4B	18.2469	19.1734	2	49.86	0	97.008	17144000
Q5ZME1	HNRNPA2B1	18.1635	19.1881	6	36.985	0	84.201	16927000
CON__Q3SX09;Q90864;P02128;P02127;P02112;F1NMZ3	HBE1;HBE;HBB	18.1211	19.0792	2	22.06	0	23.718	8389600
CON__P02768-1	-	18.1172	18.8067	11	69.366	0	108.8	26743000
Q5CAQ0;F6SXF4	TNFSF6	17.9063	18.1908	1	28.831	0	6.285	6538500
Q98TF9;F6R347	RPL14	17.8514	NaN	1	15.478	0	18.131	945950
F1N9J4;Q98TF8	RPL22	17.824	17.6481	1	14.655	0	7.1215	1749800
CON__P12763	-	17.5603	19.4122	2	38.418	0	52.329	12474000
CON__P05787;CON__H-INV:HIT000292931	-	17.5523	18.9749	10	53.704	0	123.84	20516000
Q5ZLB3;R4GKX4	HNRNPA1	17.543	18.2582	4	38.166	0	39.703	9585500
P60706;P53478	ACTB	17.5088	18.6947	1	41.736	0	22.368	12216000
E1C8Y9;R4GME2;Q5ZMI0;E1BRL9;E1BVX5	SRSF3;SRSF7	17.4863	17.7875	1	19.329	0	7.9249	2869000
R4GG79;E1C4R5	-	17.3925	17.8533	1	15.75	0.0082645	5.7189	3270900
P09987;P08288;P08284;F1NME1;P08286;P08285;P08287;F1NPJ2	HIST1H111L	17.2411	18.6779	1	21.881	0	13.183	4019900
E1C453;Q5ZIQ3;H9L0I0	HNRNPK	17.223	18.4666	5	47.102	0	56.785	12365000
P00356;F1NH87	GAPDH	17.1329	17.3943	3	35.704	0	31.983	5371800
P11501	HSP90AA1	17.1128	18.2786	0	84.058	0	99.691	15170000
P18660	RPLP1	17.0902	18.384	1	11.477	0	10.965	1444800
F1NWP3;O73885;Q7SX63;P08106;B3VHV2;B6EAX2	HSPA8;HSP70	17.0738	18.4205	6	70.87	0	77.289	16131000
F1NN16	RPS7	17.0657	18.2789	2	22.311	0	23.117	4552400
Q90YX6;F6UGI5	-	17.0241	17.8326	1	9.9082	0	7.8379	2566900
F2Z4L5;P32429	RPL7A	16.9252	17.4745	2	29.868	0	13.621	3065500
F1P2P9;Q5ZMT0	YWHAE	16.8666	18.4103	2	26.633	0	28.306	7018200
E1BSJ2	RPS21	16.8061	17.9654	1	9.1183	0	16.175	1852600
H9L340;Q5ZLC5	ATP5F1B	16.797	18.2529	3	52.946	0	45.886	10656000
P00548;F1NW43	PKM	16.7478	17.6587	4	58.014	0	37.647	10460000
F2Z4K8;P62149;O93410	CALM1	16.7269	17.5863	1	16.706	0	14.786	2747300
Q04619;F1NC33	HSP90AB1	16.6562	17.6711	2	83.426	0	38.553	10296000
F1NS91	-	16.6008	17.3719	2	21.835	0	18.597	2421100
F1NG74;O57391	ENO2	16.5615	18.2208	1	47.324	0	18.836	8044100
Q5ZL72	HSPD1	16.5327	17.4709	5	60.972	0	49.16	8570600
F1NVA4	-	16.4154	17.2436	1	30.352	0	7.868	3396200
Q90593	HSPA5	16.3933	17.4092	5	72.018	0	43.866	7804000
Q5ZIH1	HNRNPD	16.391	17.3959	2	29.355	0	16.347	2842400
F1NXR6;P09644;F1NMP5	TUBA8B	16.3439	17.5156	2	51.042	0	21.496	5952300
E1C3K3;Q5ZI56;F1NYL7	RCJMB04_30d2	16.3019	16.2282	1	18.938	0	9.8675	1575600
Q5ZHW8	RPS14	16.2971	17.2395	1	16.273	0	6.0488	941060
Q7ZZR8;Q9YGW4;Q90574;F1N8D4;Q90WF1;Q90WF0	ggFLNb; FLNB	16.1994	17.9012	1	32.296	0	9.4639	4160600
Q8UVX3;F1NI22;F1NGA2;Q9DDH7	ATP5A1	16.1928	17.1809	3	60.186	0	31.016	6928000
F1NDC2	RPS23	16.1673	17.8936	1	15.807	0	10.665	1902600
Q5F3R9;F2Z4L4	SET	16.1495	16.7815	1	32.151	0	13.079	1668000
Q8UWG7	RPL6	16.1234	17.0993	1	33.923	0	6.4148	2329700
CON__P07477	-	16.0315	17.0195	1	26.558	0	6.8731	1598700
P27463;F1NJC7;F1NIE7;Q9DD46;O93344;E1BT93	ALDH1A1; ALDH6	16.0195	16.9022	2	55.809	0	16.233	4722700
F1NB02;Q6EE57	-	16.011	16.9529	2	24.185	0	12.391	1736100
F1NBW8;Q8AYM3;Q5ZMJ6;Q5ZLG7;F1NJ10	avANT;SLC25A4;SLC25A6;SLC25A5	15.9799	17.1895	2	29.149	0	27.985	3639800
CON__Q8VED5;CON__Q5XKE5	--	15.9322	15.2317	1	57.552	0	9.1903	2828100
F1N9J7;F1NW97	TUBA4B	15.9134	17.0244	1	50.059	0	12.39	4095600
P47826;F1NB66	RPLP0	15.8787	18.0715	2	34.285	0	31.02	4700000
O57535	-	15.855	18.203	2	17.288	0	17.304	4332100
F1NJ54;Q5ZIW4;F1NCV1;Q5ZJN7;R9PXN5;R9PXN4;R9PXQ0;P05094-2;P05094;P20111;Q90734;P20111-2	RCJMB04_23c5;ACTN2; ACTN1;ACTN4	15.8428	17.1433	1	19.132	0	8.2453	2238800
F1NF89	RPS24	15.8268	16.6771	1	15.643	0.0080645	5.6562	977490
F1NTT2	-	15.787	17.1462	1	7.8409	0	7.7635	604780
P00340;E1BTT8	LDHA	15.7411	16.6068	2	36.514	0	15.194	2627800
B5AAV6;P08110;F1NWB7;Q90WA6	HSP90B1	15.7012	15.4794	2	91.215	0	17.983	3859500
R4GGJ0	RPS16	15.6571	14.5719	1	16.413	0	6.1372	836330
CON__H-INV:HIT000015463	-	15.6509	15.8157	1	33.423	0	7.4935	1200400
F1NFS0;Q90705;R4GK33	EEF2	15.6465	17.036	6	95.228	0	44.007	8355300
Q5ZIE3	SRP14	15.6202	17.4705	1	12.528	0	12.188	1391800
CON__Q04695	-	15.6036	17.1467	1	48.105	0	16.107	5652000
P51417;F1NQG5	RPL15	15.5312	16.6263	1	19.305	0	11.616	1336600
E1C4N0	RPS10	15.5247	16.7176	1	18.91	0	6.7049	1239300
P41125	RPL13	15.3989	16.2332	1	24.395	0	24.467	1082100
Q5ZIK9	COPE	15.2952	NaN	1	34.369	0	6.0335	643310
P21566	CFL2	15.0923	16.2471	1	18.661	0	7.3266	1239900
F1NIB4;Q90626;Q90602	-	14.9706	15.9972	1	24.572	0	7.4908	1170200
G1K342;P09244;P32882;G1K338;P09203	TUBB2A	14.948	17.413	2	43.509	0	14.621	3504100
Q5F491;F1NIX2	DDX3X	14.9043	15.8875	1	72.048	0	13.047	3377400
CON__P34955	-	14.8826	15.8892	1	46.103	0	20.781	1908800
P00337	LDHB	14.8592	16.9461	1	36.318	0	26.746	2495900
E1BYN7	VDAC1	14.8526	15.3842	1	30.706	0	6.4571	1230000
E1BZR1;F6SG96	HNRNPR	14.8379	15.9766	2	71.019	0	17.584	3188100
F1NFC6;P47836	RPS4	14.7437	16.231	1	29.463	0	25.637	1669600
Q5ZKC9	YWHAZ	14.7143	15.4386	1	27.775	0	7.4408	998090
R9PXN1;Q8JFP1	EIF4A2	14.5844	15.7474	2	43.551	0	12.711	1750700
CON__P35908;CON__Q3TTY5	-	14.559	15.3175	1	65.865	0	6.8367	2533900
P02607-2;P02607	MYL6	14.4922	15.7294	1	16.983	0	7.3466	773730
Q6EE32	#NAME?	14.4349	15.1973	1	46.88	0	9.6694	1313800
F1NCI5	HNRNPA0	14.4141	15.2616	1	32.986	0	6.455	916710
Q5ZM95;Q5F3I8;Q6WNG8;F1NEG6	RCJMB04_2m14;HNRNPH2	14.4104	15.4306	1	53.635	0	11.975	1186900
F2Z4K7	RPS3A	14.2204	16.4323	1	29.867	0	10.952	1827900
F1NSP8;Q2MHD2	-	14.2041	15.1122	2	74.994	0	15.435	2008800
F1N9H3;P09102;V9GZR5	P4HB	14.1357	15.3018	2	55.786	0	14.398	1926900
F1NAS3	AKAP11	14.0771	14.5842	1	209.12	0	6.1275	3306000
CON__Q3SZH5	-	14.0412	15.9971	1	45.456	0	7.7169	1480700
Q8JG64	PDIA3	13.9901	14.9606	1	56.181	0	7.0536	1348400
P17785	ANXA2	13.9828	15.1736	1	38.64	0	16.147	1222400
CON__Q3T052	-	13.9237	15.6654	1	101.51	0	12.524	2902900
H9KYT1;Q5ZMU9	vcp	13.8391	15.2709	1	58.821	0	7.1732	1625800
Q5KTI9;F1N9N8	CPS1	13.616	15.4787	1	158.34	0	10.023	3958700
F1P555	-	13.6118	14.8567	1	69.572	0	7.7816	1307900
Q5F424	CCT2	13.587	14.5382	1	57.431	0	6.5602	1155100
E1BVT3	MDH2	13.2393	16.4846	2	35.655	0	16.393	2230100
Q90623-2;Q90623;F1NA71	PPP1R12A	13.2338	15.5965	1	106.97	0	6.1715	2663000
P13648	LMNA	12.681	13.764	1	73.164	0	12.38	901060
CON__P04264	-	11.2022	15.1575	2	66.017	0	14.677	1206000
Notes:
iBAQ= Log2-transformed, Intensity based absolute quantitation value
* The score is correlated with the Q-value
